# Supplementary material for: Pancreatic tumors exhibit myeloid-driven amino acid stress and upregulate arginine biosynthesis
Source: eLife. 2023 May 31;12:e81289. doi: 10.7554/eLife.81289 (PMC10260022; doi:10.7554/eLife.81289)
Supplement: Figure 1—source data 1. — logFC(in vivo/RPMI) and t-statistic (t) outputs from limma are reported in this table. [file elife-81289-fig1-data1.xlsx]

## Sheet: limma-voom_Tumor-RPMI
Differential expression of genes in mPDAC3 cells isolated from orthotopic tumors and isolated from RPMI-1640 cultures.
ENTREZID	SYMBOL	GENENAME	logFC(in vivo/RPMI)	AveExpr	t	P.Value	adj.P.Val	B
67724	Pop1	processing of precursor 1, ribonuclease P/MRP family, (S. cerevisiae)	-2.9496	6.39612	-45.9875	8.22624e-26	1.34729e-21	48.5433
20135	Rrm2	ribonucleotide reductase M2	-3.17901	7.27314	-39.3856	3.86221e-24	3.16276e-20	45.1111
72515	Wdr43	WD repeat domain 43	-2.18822	7.81107	-35.9693	3.64796e-23	1.99154e-19	42.9935
26909	Exo1	exonuclease 1	-2.94706	4.92786	-34.2956	1.18274e-22	4.84274e-19	41.537
107272	Psat1	phosphoserine aminotransferase 1	-3.08898	8.23223	-33.2503	2.5364e-22	8.30823e-19	41.1073
76843	Dtl	denticleless E3 ubiquitin protein ligase	-2.71978	6.16817	-32.2796	5.25982e-22	1.43575e-18	40.3272
319909	Ism1	isthmin 1, angiogenesis inhibitor	-5.28599	2.48025	-31.874	7.17822e-22	1.6795e-18	37.7167
15201	Hells	helicase, lymphoid specific	-2.56903	7.09516	-31.1118	1.30107e-21	2.39834e-18	39.5059
17975	Ncl	nucleolin	-1.97803	11.0717	-31.0955	1.31793e-21	2.39834e-18	39.5062
72662	Dis3	DIS3 homolog, exosome endoribonuclease and 3'-5' exoribonuclease	-1.94434	6.50714	-30.8799	1.5634e-21	2.56054e-18	39.3034
23834	Cdc6	cell division cycle 6	-2.44351	5.68826	-30.7334	1.75694e-21	2.61592e-18	39.1355
17217	Mcm4	minichromosome maintenance complex component 4	-2.22625	7.94026	-29.8242	3.66942e-21	4.68831e-18	38.4974
67134	Nop56	NOP56 ribonucleoprotein	-2.19523	8.64881	-29.8071	3.72134e-21	4.68831e-18	38.4845
100102	Pcsk9	proprotein convertase subtilisin/kexin type 9	-6.99125	3.03508	-29.6673	4.67315e-21	5.46692e-18	37.0446
234549	Heatr3	HEAT repeat containing 3	-1.71512	6.80055	-29.2863	5.73031e-21	6.25674e-18	38.049
56338	Txnip	thioredoxin interacting protein	4.09652	6.32498	29.1343	7.27382e-21	7.38543e-18	37.7371
56095	Ftsj3	FtsJ RNA methyltransferase homolog 3 (E. coli)	-1.75697	7.77226	-28.9401	7.66591e-21	7.38543e-18	37.7685
245474	Dkc1	dyskeratosis congenita 1, dyskerin	-2.22059	7.29084	-28.8121	8.54447e-21	7.77452e-18	37.6575
233315	Mtmr10	myotubularin related protein 10	-2.24899	6.13368	-28.0631	1.62644e-20	1.40199e-17	37.0058
68014	Zwilch	zwilch kinetochore protein	-1.85721	5.15504	-27.8675	1.92931e-20	1.57992e-17	36.7819
233406	Prc1	protein regulator of cytokinesis 1	-1.94538	7.02546	-27.7877	2.06913e-20	1.61373e-17	36.7794
19224	Ptgs1	prostaglandin-endoperoxide synthase 1	3.47503	6.84361	27.7971	2.24901e-20	1.67428e-17	36.6641
70572	Ipo5	importin 5	-1.71761	8.7222	-27.5819	2.48063e-20	1.76642e-17	36.6063
20509	Slc19a1	solute carrier family 19 (folate transporter), member 1	-2.40117	4.81923	-27.5152	2.63176e-20	1.79595e-17	36.4454
445007	Nup85	nucleoporin 85	-1.85386	6.96868	-27.3499	3.04819e-20	1.97119e-17	36.3978
17119	Mxd1	MAX dimerization protein 1	4.15083	4.78324	27.3674	3.12926e-20	1.97119e-17	36.129
11640	Akap1	A kinase (PRKA) anchor protein 1	-2.11404	6.12369	-27.0637	3.93908e-20	2.38942e-17	36.1343
59028	Rcl1	RNA terminal phosphate cyclase-like 1	-2.32579	5.81204	-26.9305	4.44223e-20	2.59839e-17	36.0084
13838	Epha4	Eph receptor A4	-2.87359	6.62197	-26.3915	7.56819e-20	4.2742e-17	35.4903
17218	Mcm5	minichromosome maintenance complex component 5	-2.44395	7.69157	-26.2131	8.56993e-20	4.67861e-17	35.3716
53975	Ddx20	DEAD box helicase 20	-1.6781	5.91311	-26.1034	9.48949e-20	5.01351e-17	35.2597
70769	Nolc1	nucleolar and coiled-body phosphoprotein 1	-2.44064	8.03553	-26.0018	1.04328e-19	5.22955e-17	35.1756
68275	Rpa1	replication protein A1	-1.73079	7.02186	-25.9912	1.0537e-19	5.22955e-17	35.1654
14281	Fos	FBJ osteosarcoma oncogene	5.25141	5.95788	26.0186	1.13742e-19	5.42909e-17	35.0794
80859	Nfkbiz	nuclear factor of kappa light polypeptide gene enhancer in B cells inhibitor, zeta	2.63864	6.35192	25.915	1.1602e-19	5.42909e-17	35.07
17220	Mcm7	minichromosome maintenance complex component 7	-1.76163	7.87178	-25.7718	1.29466e-19	5.77416e-17	34.9601
67141	Fbxo5	F-box protein 5	-2.77679	4.92711	-25.7638	1.30446e-19	5.77416e-17	34.883
100039239	Gm2115	predicted gene 2115	-6.2859	0.601342	-25.696	1.3907e-19	5.98589e-17	31.9362
26934	Racgap1	Rac GTPase-activating protein 1	-1.66033	7.75648	-25.6687	1.42701e-19	5.98589e-17	34.863
12449	Ccnf	cyclin F	-2.17118	5.67102	-25.6197	1.49472e-19	5.98589e-17	34.8048
16551	Kif11	kinesin family member 11	-2.02733	6.98653	-25.6171	1.49848e-19	5.98589e-17	34.8145
70024	Mcm10	minichromosome maintenance 10 replication initiation factor	-1.98167	5.73456	-25.5632	1.57711e-19	6.14998e-17	34.7517
17688	Msh6	mutS homolog 6	-1.65995	7.01258	-25.5376	1.61593e-19	6.15482e-17	34.7392
67849	Cdca5	cell division cycle associated 5	-2.37354	5.20097	-25.4952	1.6824e-19	6.17349e-17	34.6708
11564	Adsl	adenylosuccinate lyase	-1.7662	6.99054	-25.4866	1.69622e-19	6.17349e-17	34.6909
52874	Pum3	pumilio RNA-binding family member 3	-1.78914	7.45773	-25.4446	1.76546e-19	6.28582e-17	34.6505
72278	Ccpg1	cell cycle progression 1	2.35311	4.4938	25.0543	2.56851e-19	8.87718e-17	34.2015
101612	Grwd1	glutamate-rich WD repeat containing 1	-2.3739	5.98351	-25.0304	2.62855e-19	8.87718e-17	34.2519
15382	Hnrnpa1	heterogeneous nuclear ribonucleoprotein A1	-1.86909	9.74078	-25.0197	2.65589e-19	8.87718e-17	34.241
14450	Gart	phosphoribosylglycinamide formyltransferase	-1.92823	7.29509	-24.9559	2.82552e-19	9.25526e-17	34.1814
13605	Ect2	ect2 oncogene	-2.11209	7.35891	-24.8761	3.05336e-19	9.80547e-17	34.104
27401	Skp2	S-phase kinase-associated protein 2	-1.72528	5.50554	-24.7474	3.46207e-19	1.09042e-16	33.9764
66614	Gpatch4	G patch domain containing 4	-2.13216	5.98692	-24.7217	3.55021e-19	1.09708e-16	33.9538
106248	Qtrt2	queuine tRNA-ribosyltransferase accessory subunit 2	-1.93885	5.69867	-24.6111	3.95754e-19	1.20031e-16	33.8451
20937	Suv39h1	suppressor of variegation 3-9 1	-2.3755	6.15499	-24.55	4.20264e-19	1.25147e-16	33.7864
16647	Kpna2	karyopherin (importin) alpha 2	-2.60165	7.74954	-24.4573	4.8755e-19	1.41799e-16	33.6376
80287	Apobec3	apolipoprotein B mRNA editing enzyme, catalytic polypeptide 3	2.26361	6.02039	24.3676	5.03351e-19	1.41799e-16	33.5932
270906	Prr11	proline rich 11	-2.02579	5.92815	-24.3569	5.08764e-19	1.41799e-16	33.5954
18392	Orc1	origin recognition complex, subunit 1	-2.19513	4.30009	-24.3528	5.10816e-19	1.41799e-16	33.4921
108912	Cdca2	cell division cycle associated 2	-2.1693	5.06242	-24.2739	5.52502e-19	1.4955e-16	33.4965
59014	Rrs1	ribosome biogenesis regulator 1	-2.06043	6.31763	-24.2578	5.61432e-19	1.4955e-16	33.4977
110109	Nop2	NOP2 nucleolar protein	-1.78418	7.3689	-24.2495	5.6613e-19	1.4955e-16	33.4864
20425	Shmt1	serine hydroxymethyltransferase 1 (soluble)	-1.86699	5.57665	-24.1033	6.55201e-19	1.70332e-16	33.3401
50786	Hs6st2	heparan sulfate 6-O-sulfotransferase 2	-4.80667	4.38077	-24.1602	6.81456e-19	1.74389e-16	33.1369
68979	Nol11	nucleolar protein 11	-1.69357	6.47748	-24.0001	7.26819e-19	1.77158e-16	33.2391
20133	Rrm1	ribonucleotide reductase M1	-1.96008	7.94995	-23.9925	7.32347e-19	1.77158e-16	33.226
18005	Nek2	NIMA (never in mitosis gene a)-related expressed kinase 2	-1.89685	6.12264	-23.9778	7.43329e-19	1.77158e-16	33.218
12428	Ccna2	cyclin A2	-2.12667	7.32712	-23.9651	7.52837e-19	1.77158e-16	33.2005
22145	Tuba4a	tubulin, alpha 4A	-2.21025	7.72104	-23.9622	7.55066e-19	1.77158e-16	33.1962
108156	Mthfd1	methylenetetrahydrofolate dehydrogenase (NADP+ dependent), methenyltetrahydrofolate cyclohydrolase, formyltetrahydrofolate synthase	-1.99295	6.62853	-23.9594	7.57179e-19	1.77158e-16	33.1975
16571	Kif4	kinesin family member 4	-2.17357	5.92576	-23.9228	7.85649e-19	1.796e-16	33.1625
229949	Ak5	adenylate kinase 5	-5.62802	3.53815	-24.013	7.89549e-19	1.796e-16	32.6401
110749	Chaf1b	chromatin assembly factor 1, subunit B (p60)	-2.24921	5.53833	-23.8587	8.38294e-19	1.88076e-16	33.0971
269378	Ahcy	S-adenosylhomocysteine hydrolase	-2.52752	7.70357	-23.8917	8.5093e-19	1.88332e-16	33.0798
21781	Tfdp1	transcription factor Dp 1	-1.30679	7.20062	-23.7386	9.46844e-19	2.05142e-16	32.9711
69716	Trip13	thyroid hormone receptor interactor 13	-2.14172	5.29599	-23.7334	9.51936e-19	2.05142e-16	32.9605
53416	Stk39	serine/threonine kinase 39	-3.05427	4.3709	-23.7086	9.79419e-19	2.07804e-16	32.9055
103468	Nup107	nucleoporin 107	-2.13498	6.08133	-23.6952	9.89666e-19	2.07804e-16	32.9327
668661	2410002F23Rik	RIKEN cDNA 2410002F23 gene	-1.83095	5.90581	-23.6752	1.01004e-18	2.09397e-16	32.9124
69860	Eif1ad	eukaryotic translation initiation factor 1A domain containing	-1.74564	6.48613	-23.5227	1.18034e-18	2.41645e-16	32.7551
11804	Aplp2	amyloid beta (A4) precursor-like protein 2	2.13987	8.48736	23.4226	1.30826e-18	2.64527e-16	32.6441
110033	Kif22	kinesin family member 22	-1.69461	5.77563	-23.3693	1.38212e-18	2.76053e-16	32.5996
28000	Prpf19	pre-mRNA processing factor 19	-1.49554	8.0299	-23.2174	1.61717e-18	3.19108e-16	32.4294
219114	Ska3	spindle and kinetochore associated complex subunit 3	-1.98959	4.64941	-23.1279	1.77491e-18	3.46065e-16	32.3342
209318	Gps1	G protein pathway suppressor 1	-1.4431	6.62925	-23.0426	1.94002e-18	3.73808e-16	32.2539
20877	Aurkb	aurora kinase B	-2.02085	5.6545	-22.9887	2.05245e-18	3.90872e-16	32.2057
51797	Ctps	cytidine 5'-triphosphate synthase	-1.75365	7.37958	-22.9277	2.18814e-18	4.11924e-16	32.1302
18813	Pa2g4	proliferation-associated 2G4	-2.08918	8.29618	-22.8966	2.26073e-18	4.20752e-16	32.0927
27041	G3bp1	GTPase activating protein (SH3 domain) binding protein 1	-1.40074	8.55054	-22.8298	2.42531e-18	4.46311e-16	32.0207
70465	Wdr77	WD repeat domain 77	-1.60211	7.60619	-22.7504	2.63724e-18	4.79919e-16	31.9401
110960	Tars	threonyl-tRNA synthetase	-1.52959	8.09069	-22.5155	3.38458e-18	6.09151e-16	31.6888
52513	Ddx56	DEAD box helicase 56	-1.54909	6.25089	-22.4118	3.78145e-18	6.73179e-16	31.5876
18969	Pola2	polymerase (DNA directed), alpha 2	-1.73906	6.09839	-22.3888	3.87596e-18	6.82585e-16	31.5643
74168	Zdhhc16	zinc finger, DHHC domain containing 16	-1.37691	5.51123	-22.3655	3.97386e-18	6.92381e-16	31.5453
14852	Gspt1	G1 to S phase transition 1	-1.45386	7.97368	-22.3366	4.09937e-18	7.06732e-16	31.4933
101867	Rrp8	ribosomal RNA processing 8	-1.76478	5.37217	-22.2919	4.30121e-18	7.33804e-16	31.4675
15354	Hmgb3	high mobility group box 3	-2.14655	5.41179	-22.2476	4.51135e-18	7.6172e-16	31.4203
12558	Cdh2	cadherin 2	-5.7657	3.91103	-22.3025	4.65312e-18	7.77641e-16	31.1727
13653	Egr1	early growth response 1	4.41831	7.21927	22.2912	4.71002e-18	7.79199e-16	31.3736
105837	Mtbp	Mdm2, transformed 3T3 cell double minute p53 binding protein	-1.64434	5.8261	-22.1519	5.00291e-18	8.19377e-16	31.3178
107995	Cdc20	cell division cycle 20	-1.76112	6.5135	-22.1098	5.2365e-18	8.43839e-16	31.2606
21379	Tbrg4	transforming growth factor beta regulated gene 4	-1.86076	6.82769	-22.1065	5.25531e-18	8.43839e-16	31.2544
108147	Atic	5-aminoimidazole-4-carboxamide ribonucleotide formyltransferase/IMP cyclohydrolase	-1.53479	8.03093	-22.0593	5.53219e-18	8.79672e-16	31.1921
116914	Slc19a2	solute carrier family 19 (thiamine transporter), member 2	-1.78735	4.98661	-22.0178	5.7874e-18	9.06849e-16	31.1726
27374	Prmt5	protein arginine N-methyltransferase 5	-1.62902	6.81518	-22.0136	5.81384e-18	9.06849e-16	31.1518
433702	Ncbp1	nuclear cap binding protein subunit 1	-1.39004	7.04408	-21.9221	6.42467e-18	9.83779e-16	31.0473
22247	Umps	uridine monophosphate synthetase	-2.04043	6.43963	-21.9217	6.42718e-18	9.83779e-16	31.0531
70333	Cd3eap	CD3E antigen, epsilon polypeptide associated protein	-1.91597	5.09989	-21.9104	6.50743e-18	9.86839e-16	31.0564
15205	Hes1	hes family bHLH transcription factor 1	-3.07793	7.07313	-21.9675	6.68166e-18	1.00397e-15	31.0205
28019	Ing4	inhibitor of growth family, member 4	2.15636	4.92495	21.864	6.84625e-18	1.01934e-15	31.0047
72117	Naa50	N(alpha)-acetyltransferase 50, NatE catalytic subunit	-1.50029	8.37117	-21.8414	7.0182e-18	1.03553e-15	30.9499
72415	Sgo1	shugoshin 1	-2.48825	5.69103	-21.8453	7.18052e-18	1.05002e-15	30.9568
15525	Hspa4	heat shock protein 4	-1.31478	9.04203	-21.8071	7.28729e-18	1.05621e-15	30.9113
71819	Kif23	kinesin family member 23	-1.72302	7.34701	-21.7973	7.36628e-18	1.05829e-15	30.9087
212547	Nepro	nucleolus and neural progenitor protein	-1.74237	5.09489	-21.6784	8.3968e-18	1.19585e-15	30.801
224045	Eif2b5	eukaryotic translation initiation factor 2B, subunit 5 epsilon	-1.30072	6.65885	-21.6583	8.58581e-18	1.21223e-15	30.7552
27221	Chaf1a	chromatin assembly factor 1, subunit A (p150)	-1.98489	6.74331	-21.5796	9.36657e-18	1.31116e-15	30.6741
66942	Ddx18	DEAD box helicase 18	-1.54428	6.55992	-21.5692	9.47582e-18	1.31521e-15	30.6636
22137	Ttk	Ttk protein kinase	-2.28913	4.73941	-21.5231	9.97357e-18	1.37266e-15	30.6294
20556	Slfn2	schlafen 2	3.96359	3.90169	21.57	1.03326e-17	1.41022e-15	30.5804
28185	Tomm70a	translocase of outer mitochondrial membrane 70A	-1.70131	8.08459	-21.4263	1.1109e-17	1.50367e-15	30.488
70218	Kif18b	kinesin family member 18B	-2.1682	5.34743	-21.4014	1.14218e-17	1.53333e-15	30.4961
100502766	Kifc1	kinesin family member C1	-1.71323	5.68352	-21.3699	1.18313e-17	1.5754e-15	30.4559
60530	Fignl1	fidgetin-like 1	-2.3058	5.43762	-21.3533	1.20531e-17	1.59198e-15	30.4386
74838	Naa15	N(alpha)-acetyltransferase 15, NatA auxiliary subunit	-1.30895	8.03502	-21.3279	1.24006e-17	1.62478e-15	30.3772
140488	Igf2bp3	insulin-like growth factor 2 mRNA binding protein 3	-4.06463	3.44679	-21.3905	1.25902e-17	1.63653e-15	30.2659
100088	Rcc1	regulator of chromosome condensation 1	-1.9581	6.7561	-21.2764	1.31385e-17	1.69435e-15	30.3371
236732	Rbm10	RNA binding motif protein 10	-1.20484	5.94051	-21.234	1.37799e-17	1.76318e-15	30.2918
15510	Hspd1	heat shock protein 1 (chaperonin)	-1.80002	10.0188	-21.2147	1.40818e-17	1.78784e-15	30.2469
268465	Eme1	essential meiotic structure-specific endonuclease 1	-2.09211	3.78629	-21.0243	1.74647e-17	2.20028e-15	30.0441
171504	Apobr	apolipoprotein B receptor	1.81728	6.02278	20.9669	1.86422e-17	2.3307e-15	29.9844
57753	Noc3l	NOC3 like DNA replication regulator	-1.34684	6.19628	-20.9429	1.9157e-17	2.37692e-15	29.9568
19362	Rad51ap1	RAD51 associated protein 1	-2.00182	4.42074	-20.9008	2.00988e-17	2.47502e-15	29.9296
433653	Gimd1	GIMAP family P-loop NTPase domain containing 1	-9.31404	-4.74042	-20.7542	2.37726e-17	2.90558e-15	24.4241
14873	Gsto1	glutathione S-transferase omega 1	-2.28052	8.75693	-20.8025	2.4442e-17	2.96526e-15	29.694
69885	Aunip	aurora kinase A and ninein interacting protein	-3.24051	3.85868	-20.7146	2.48784e-17	2.99601e-15	29.6467
72022	Slc35f2	solute carrier family 35, member F2	-2.98235	3.01335	-20.7055	2.51425e-17	3.00572e-15	29.4154
18817	Plk1	polo like kinase 1	-2.05098	6.06099	-20.6937	2.54849e-17	3.01853e-15	29.6802
19139	Prps1	phosphoribosyl pyrophosphate synthetase 1	-2.68195	5.32484	-20.758	2.57394e-17	3.01853e-15	29.6844
13036	Ctsh	cathepsin H	4.76751	5.90524	20.7532	2.58998e-17	3.01853e-15	29.6826
328949	Mcc	mutated in colorectal cancers	-4.53989	2.91945	-20.7502	2.59869e-17	3.01853e-15	29.5119
56321	Aatf	apoptosis antagonizing transcription factor	-1.58543	6.03984	-20.6571	2.65826e-17	3.06599e-15	29.6316
227696	Phyhd1	phytanoyl-CoA dioxygenase domain containing 1	4.31527	2.89307	20.6554	2.71901e-17	3.11412e-15	29.2817
16155	Il10rb	interleukin 10 receptor, beta	2.50535	5.2465	20.654	2.75786e-17	3.13668e-15	29.6161
66645	Pspc1	paraspeckle protein 1	-1.77561	5.85247	-20.5282	3.08576e-17	3.48542e-15	29.4876
16391	Irf9	interferon regulatory factor 9	2.95024	3.43251	20.3325	3.87561e-17	4.34758e-15	29.2058
330122	Cxcl3	chemokine (C-X-C motif) ligand 3	4.50512	0.761807	20.3902	3.93698e-17	4.38639e-15	29.1709
21335	Tacc3	transforming, acidic coiled-coil containing protein 3	-1.30838	7.17256	-20.2975	4.03737e-17	4.44661e-15	29.1914
30877	Gnl3	guanine nucleotide binding protein-like 3 (nucleolar)	-2.00457	7.42573	-20.3002	4.04534e-17	4.44661e-15	29.1904
330836	Slc7a6	solute carrier family 7 (cationic amino acid transporter, y+ system), member 6	-1.92843	7.70599	-20.2874	4.08547e-17	4.46079e-15	29.1759
11792	Apex1	apurinic/apyrimidinic endonuclease 1	-2.06998	4.53048	-20.2721	4.15923e-17	4.49957e-15	29.2094
106298	Rrn3	RRN3 RNA polymerase I transcription factor homolog (yeast)	-1.36263	6.60926	-20.2687	4.17593e-17	4.49957e-15	29.163
276919	Gemin4	gem nuclear organelle associated protein 4	-1.69687	5.38223	-20.2136	4.45536e-17	4.76928e-15	29.1274
22436	Xdh	xanthine dehydrogenase	5.01817	3.02028	20.2415	4.6828e-17	4.98019e-15	28.964
12266	C3	complement component 3	8.31796	3.68865	20.2304	4.74424e-17	5.01297e-15	28.7625
21973	Top2a	topoisomerase (DNA) II alpha	-2.28198	9.24281	-20.1818	5.0224e-17	5.27288e-15	28.9651
98238	Lrrc59	leucine rich repeat containing 59	-1.41187	8.86475	-20.1007	5.08909e-17	5.30886e-15	28.9471
71878	Fam83d	family with sequence similarity 83, member D	-2.22053	4.81976	-20.0862	5.17705e-17	5.36644e-15	28.9908
50492	Thop1	thimet oligopeptidase 1	-1.81555	5.85611	-20.042	5.45497e-17	5.59493e-15	28.9132
73674	Wdr75	WD repeat domain 75	-1.72889	7.02978	-20.0401	5.46754e-17	5.59493e-15	28.89
17215	Mcm3	minichromosome maintenance complex component 3	-1.96457	7.79072	-20.0406	5.54536e-17	5.59493e-15	28.8668
72386	2610035D17Rik	RIKEN cDNA 2610035D17 gene	-2.45395	3.70315	-20.0265	5.55643e-17	5.59493e-15	28.8407
67776	Vwa5a	von Willebrand factor A domain containing 5A	3.48435	4.67428	20.094	5.56829e-17	5.59493e-15	28.9119
109212	Pimreg	PICALM interacting mitotic regulator	-2.41999	5.85644	-20.0714	5.63529e-17	5.62773e-15	28.8881
654467	Gm10052	heterogeneous nuclear ribonucleoprotein A1 pseudogene	-1.9271	4.25036	-19.9472	6.10472e-17	6.05958e-15	28.8269
24015	Abce1	ATP-binding cassette, sub-family E (OABP), member 1	-1.6997	8.96677	-19.9345	6.19766e-17	6.11478e-15	28.7475
16476	Jun	jun proto-oncogene	3.24976	6.26083	19.9978	6.23829e-17	6.118e-15	28.7758
217011	Nle1	notchless homolog 1	-2.04306	4.51307	-19.9185	6.31725e-17	6.12324e-15	28.7932
213773	Tbl3	transducin (beta)-like 3	-1.75144	5.96723	-19.9146	6.34629e-17	6.12324e-15	28.7589
12544	Cdc45	cell division cycle 45	-1.86912	5.45871	-19.9126	6.36159e-17	6.12324e-15	28.7643
27981	Rsrp1	arginine/serine rich protein 1	2.35516	6.76544	19.9771	6.39318e-17	6.12324e-15	28.7455
170762	Nup155	nucleoporin 155	-1.5135	7.43611	-19.8541	6.82131e-17	6.43126e-15	28.6569
231712	Trafd1	TRAF type zinc finger domain containing 1	2.65254	4.96237	19.8742	6.82821e-17	6.43126e-15	28.7168
56489	Ikbke	inhibitor of kappaB kinase epsilon	3.31256	4.89624	19.921	6.83258e-17	6.43126e-15	28.7173
109065	Dnaaf2	dynein, axonemal assembly factor 2	-1.8998	4.12219	-19.8435	6.90885e-17	6.46589e-15	28.7039
69071	Tmem97	transmembrane protein 97	-2.44882	5.694	-19.8974	7.00834e-17	6.52174e-15	28.6695
229363	Gmps	guanine monophosphate synthetase	-1.83773	7.5492	-19.8233	7.07714e-17	6.54856e-15	28.6215
107753	Lgals2	lectin, galactose-binding, soluble 2	-7.7809	1.40999	-19.8647	7.3061e-17	6.72244e-15	27.7915
236930	Ercc6l	excision repair cross-complementing rodent repair deficiency complementation group 6 like	-2.38299	4.96262	-19.7854	7.55472e-17	6.91235e-15	28.6099
27399	Ip6k1	inositol hexaphosphate kinase 1	1.41455	5.76504	19.7547	7.68371e-17	6.99133e-15	28.5704
83703	Dbr1	debranching RNA lariats 1	-1.60667	4.98737	-19.7383	7.83627e-17	7.09075e-15	28.572
66973	Mrps18b	mitochondrial ribosomal protein S18B	-1.94511	4.93566	-19.7262	7.95124e-17	7.1268e-15	28.5628
27966	Rrp9	ribosomal RNA processing 9, U3 small nucleolar RNA binding protein	-2.02309	6.03964	-19.7249	7.96315e-17	7.1268e-15	28.5372
17760	Map6	microtubule-associated protein 6	-2.75551	4.78098	-19.7541	8.01077e-17	7.13046e-15	28.5582
17279	Melk	maternal embryonic leucine zipper kinase	-1.55669	5.56247	-19.7015	8.19083e-17	7.25132e-15	28.5131
80290	Gpr146	G protein-coupled receptor 146	6.34873	1.10857	19.6887	8.31757e-17	7.32393e-15	26.698
227715	Exosc2	exosome component 2	-1.99543	6.6062	-19.6838	8.36677e-17	7.32786e-15	28.4749
11816	Apoe	apolipoprotein E	8.90814	3.93129	19.7412	8.46562e-17	7.375e-15	28.4358
70420	Arpin	actin-related protein 2/3 complex inhibitor	-1.87604	5.30069	-19.6645	8.56403e-17	7.42125e-15	28.4744
12461	Cct2	chaperonin containing Tcp1, subunit 2 (beta)	-1.32684	8.48188	-19.6524	8.68904e-17	7.48995e-15	28.4059
14696	Gnb4	guanine nucleotide binding protein (G protein), beta 4	-3.20244	3.5855	-19.7119	8.76862e-17	7.51898e-15	28.4685
53605	Nap1l1	nucleosome assembly protein 1-like 1	-1.74697	9.16244	-19.6299	8.92827e-17	7.616e-15	28.3772
73389	Hbp1	high mobility group box transcription factor 1	1.81917	5.57708	19.6191	9.04532e-17	7.67586e-15	28.4209
17132	Maf	avian musculoaponeurotic fibrosarcoma oncogene homolog	5.17329	3.3454	19.6345	9.62233e-17	8.12343e-15	28.283
14964	H2-D1	histocompatibility 2, D region locus 1	3.33978	6.75965	19.6269	9.71035e-17	8.1557e-15	28.3238
67045	Riok2	RIO kinase 2	-1.97544	6.37333	-19.5399	9.95438e-17	8.29372e-15	28.3011
14841	Haspin	histone H3 associated protein kinase	-1.90769	4.04306	-19.5382	9.97596e-17	8.29372e-15	28.3339
105298	Epdr1	ependymin related protein 1 (zebrafish)	-4.48484	2.11608	-19.5868	1.00708e-16	8.29675e-15	28.0653
20873	Plk4	polo like kinase 4	-1.89793	5.98104	-19.5295	1.00809e-16	8.29675e-15	28.2956
16164	Il13ra1	interleukin 13 receptor, alpha 1	3.30381	4.02975	19.5582	1.05481e-16	8.6378e-15	28.2861
12181	Bop1	block of proliferation 1	-1.6986	7.24375	-19.4653	1.08981e-16	8.88008e-15	28.1875
17865	Mybl2	myeloblastosis oncogene-like 2	-2.57023	6.37206	-19.4855	1.15172e-16	9.31806e-15	28.1654
268697	Ccnb1	cyclin B1	-2.61241	6.90904	-19.4832	1.15494e-16	9.31806e-15	28.1487
14156	Fen1	flap structure specific endonuclease 1	-2.02584	6.10755	-19.4054	1.18911e-16	9.54665e-15	28.1193
28109	D10Wsu102e	DNA segment, Chr 10, Wayne State University 102, expressed	-1.66632	6.25725	-19.3811	1.20749e-16	9.64699e-15	28.1023
66058	Tmem176a	transmembrane protein 176A	2.28169	5.78377	19.4286	1.21635e-16	9.67055e-15	28.1062
75785	Klhl24	kelch-like 24	2.92465	4.37663	19.3878	1.23106e-16	9.74021e-15	28.119
16319	Incenp	inner centromere protein	-1.83819	6.94278	-19.3505	1.25342e-16	9.86406e-15	28.0496
18767	Pkia	protein kinase inhibitor, alpha	-5.15207	1.70786	-19.363	1.25875e-16	9.86406e-15	27.387
108767	Pnrc1	proline-rich nuclear receptor coactivator 1	2.58617	6.01154	19.4078	1.26546e-16	9.86936e-15	28.0806
106952	Arap3	ArfGAP with RhoGAP domain, ankyrin repeat and PH domain 3	2.54614	2.44909	19.3381	1.2726e-16	9.87803e-15	28.0836
18226	Nup62	nucleoporin 62	-1.60421	6.70561	-19.3261	1.29139e-16	9.97658e-15	28.0269
66583	Exosc1	exosome component 1	-1.86152	5.6451	-19.3093	1.31822e-16	1.01361e-14	28.0328
72416	Lrpprc	leucine-rich PPR-motif containing	-1.22886	7.16012	-19.2933	1.34427e-16	1.02881e-14	27.9734
69137	Vstm5	V-set and transmembrane domain containing 5	-3.80711	2.24047	-19.2796	1.36712e-16	1.04143e-14	27.7209
19072	Prep	prolyl endopeptidase	-1.58325	7.33513	-19.2122	1.48507e-16	1.12604e-14	27.8736
53322	Nucb2	nucleobindin 2	2.67438	4.06786	19.2189	1.50377e-16	1.13496e-14	27.9304
223691	Eif3l	eukaryotic translation initiation factor 3, subunit L	-1.30745	8.42471	-19.1972	1.51268e-16	1.13645e-14	27.8443
13006	Smc3	structural maintenance of chromosomes 3	-1.28436	7.59601	-19.1688	1.5665e-16	1.17151e-14	27.8115
230088	Fam214b	family with sequence similarity 214, member B	2.79679	4.8756	19.1395	1.62422e-16	1.20915e-14	27.8291
170756	Slc8b1	solute carrier family 8 (sodium/lithium/calcium exchanger), member B1	2.4061	4.77422	19.1043	1.69635e-16	1.25714e-14	27.8093
54722	Gsdme	gasdermin E	-3.29547	2.95159	-19.082	1.74376e-16	1.28256e-14	27.6984
56200	Ddx21	DExD box helicase 21	-2.22015	8.23236	-19.1443	1.74632e-16	1.28256e-14	27.7056
17988	Ndrg1	N-myc downstream regulated gene 1	4.24964	8.22786	19.1357	1.76479e-16	1.29034e-14	27.7281
50766	Crim1	cysteine rich transmembrane BMP regulator 1 (chordin like)	-2.62009	6.90941	-19.1149	1.81058e-16	1.31794e-14	27.6873
16881	Lig1	ligase I, DNA, ATP-dependent	-1.65071	6.4266	-19.0179	1.88786e-16	1.36811e-14	27.6373
106795	Tcf19	transcription factor 19	-1.70675	5.40135	-19.0134	1.89835e-16	1.36965e-14	27.6778
21356	Tapbp	TAP binding protein	1.96838	6.63352	19.0001	1.96724e-16	1.40948e-14	27.6026
28114	Nsun2	NOL1/NOP2/Sun domain family member 2	-1.37057	8.04828	-18.9822	1.97334e-16	1.40948e-14	27.5769
71902	Cand1	cullin associated and neddylation disassociated 1	-1.2259	7.44322	-18.9797	1.97937e-16	1.40948e-14	27.5765
72056	1810055G02Rik	RIKEN cDNA 1810055G02 gene	-1.75544	5.65843	-18.9735	1.99469e-16	1.41424e-14	27.6142
21771	Utp4	UTP4 small subunit processome component	-1.6674	7.59355	-18.9691	2.00585e-16	1.41603e-14	27.567
20624	Eftud2	elongation factor Tu GTP binding domain containing 2	-1.29391	7.83436	-18.9656	2.01458e-16	1.41604e-14	27.5562
15364	Hmga2	high mobility group AT-hook 2	-2.47639	9.24965	-19.0249	2.02315e-16	1.41604e-14	27.5531
67493	Mettl16	methyltransferase like 16	-1.20321	6.32308	-18.916	2.14279e-16	1.49339e-14	27.5181
20848	Stat3	signal transducer and activator of transcription 3	2.25028	6.3191	18.9652	2.16371e-16	1.50158e-14	27.522
12035	Bcat1	branched chain aminotransferase 1, cytosolic	-3.7201	5.94172	-18.9305	2.27422e-16	1.57161e-14	27.5217
22156	Tuft1	tuftelin 1	-2.26338	6.13499	-18.9011	2.35893e-16	1.6233e-14	27.4321
16819	Lcn2	lipocalin 2	11.9698	0.244185	18.8557	2.49589e-16	1.71037e-14	23.7081
18140	Uhrf1	ubiquitin-like, containing PHD and RING finger domains, 1	-1.76598	7.82328	-18.7875	2.51613e-16	1.71705e-14	27.3332
52668	Ifi27	interferon, alpha-inducible protein 27	4.36714	1.81373	18.782	2.572e-16	1.74789e-14	27.0167
233802	Thumpd1	THUMP domain containing 1	-1.17185	6.22863	-18.7509	2.6345e-16	1.78297e-14	27.3103
68058	Chd1l	chromodomain helicase DNA binding protein 1-like	-1.46377	4.94628	-18.7332	2.69375e-16	1.81557e-14	27.334
231327	Ppat	phosphoribosyl pyrophosphate amidotransferase	-1.42737	6.57264	-18.7237	2.72598e-16	1.82976e-14	27.27
58184	Cnot9	CCR4-NOT transcription complex, subunit 9	-1.2719	6.92919	-18.7182	2.74494e-16	1.83496e-14	27.2557
22339	Vegfa	vascular endothelial growth factor A	2.17633	8.66029	18.7712	2.77366e-16	1.84181e-14	27.2378
72155	Cenpn	centromere protein N	-1.84082	4.68289	-18.7088	2.77767e-16	1.84181e-14	27.312
269470	Wdr3	WD repeat domain 3	-1.20022	6.73085	-18.6726	2.90718e-16	1.91774e-14	27.1962
233876	Hirip3	HIRA interacting protein 3	-1.82652	5.18248	-18.6703	2.9156e-16	1.91774e-14	27.236
17859	Mxi1	MAX interactor 1, dimerization protein	1.70632	5.28295	18.642	3.02191e-16	1.97971e-14	27.211
15983	Ifrd2	interferon-related developmental regulator 2	-1.75684	5.2075	-18.6356	3.04605e-16	1.98109e-14	27.1961
208943	Myo5c	myosin VC	-4.80136	4.55931	-18.6959	3.0482e-16	1.98109e-14	27.2148
110809	Srsf1	serine and arginine-rich splicing factor 1	-1.2143	9.09804	-18.6187	3.11213e-16	2.01464e-14	27.1096
52615	Suz12	SUZ12 polycomb repressive complex 2 subunit	-1.13297	7.37929	-18.6131	3.13414e-16	2.0209e-14	27.1106
72194	Fbxl20	F-box and leucine-rich repeat protein 20	2.43228	5.04279	18.6129	3.19397e-16	2.05141e-14	27.1783
223828	Pphln1	periphilin 1	-1.37665	7.00028	-18.5872	3.23848e-16	2.07187e-14	27.0856
104721	Ddx1	DEAD box helicase 1	-1.24661	7.44865	-18.5673	3.32096e-16	2.11637e-14	27.0513
106565	Dlk2	delta like non-canonical Notch ligand 2	-6.03042	1.07507	-18.5572	3.47005e-16	2.20281e-14	26.0378
26943	Serinc3	serine incorporator 3	2.26879	8.21733	18.5871	3.49556e-16	2.21043e-14	27.0041
27053	Asns	asparagine synthetase	-3.1365	7.22752	-18.5642	3.59785e-16	2.26637e-14	27.0256
97112	Nmd3	NMD3 ribosome export adaptor	-1.90903	6.5269	-18.4994	3.64462e-16	2.28703e-14	26.9832
328162	Trmt61a	tRNA methyltransferase 61A	-1.71552	4.28875	-18.4779	3.72017e-16	2.32554e-14	27.0275
17089	Lyar	Ly1 antibody reactive clone	-1.84895	6.55337	-18.4655	3.77926e-16	2.35349e-14	26.9398
100042069	Impdh2-ps	inosine monophosphate dehydrogenase 2, pseudogene	-1.6973	5.31548	-18.4393	3.90763e-16	2.42421e-14	26.9524
18972	Pold2	polymerase (DNA directed), delta 2, regulatory subunit	-1.83923	5.98368	-18.4284	3.96232e-16	2.44886e-14	26.9077
22143	Tuba1b	tubulin, alpha 1B	-1.98982	6.89571	-18.451	4.02445e-16	2.47653e-14	26.8726
22036	Traip	TRAF-interacting protein	-1.98862	4.43918	-18.4137	4.03733e-16	2.47653e-14	26.9475
214669	L3mbtl2	L3MBTL2 polycomb repressive complex 1 subunit	-1.74874	5.5263	-18.383	4.19859e-16	2.56584e-14	26.8719
71805	Nup93	nucleoporin 93	-1.01385	7.09098	-18.3794	4.21806e-16	2.56816e-14	26.8139
107701	Sf3b4	splicing factor 3b, subunit 4	-1.74437	6.78508	-18.3635	4.30451e-16	2.61108e-14	26.8108
72119	Tpx2	TPX2, microtubule-associated	-1.20614	7.98964	-18.3575	4.33812e-16	2.61747e-14	26.7792
72787	Ndc1	NDC1 transmembrane nucleoporin	-1.90706	5.68936	-18.3548	4.35297e-16	2.61747e-14	26.8236
12261	C1qbp	complement component 1, q subcomponent binding protein	-2.04021	7.6091	-18.4045	4.38309e-16	2.61747e-14	26.7761
14615	Gjc1	gap junction protein, gamma 1	-3.22152	4.27574	-18.4064	4.39489e-16	2.61747e-14	26.8664
55989	Nop58	NOP58 ribonucleoprotein	-1.99038	8.61	-18.3986	4.39494e-16	2.61747e-14	26.7668
234344	Naf1	nuclear assembly factor 1 ribonucleoprotein	-1.9228	5.8194	-18.3429	4.41986e-16	2.61928e-14	26.803
72133	Trub1	TruB pseudouridine (psi) synthase family member 1	-1.43286	4.26821	-18.3411	4.42997e-16	2.61928e-14	26.8474
218977	Dlgap5	DLG associated protein 5	-1.65083	5.84279	-18.318	4.56291e-16	2.68818e-14	26.7784
77128	Crebrf	CREB3 regulatory factor	3.27542	4.03017	18.315	4.67806e-16	2.74213e-14	26.7445
215999	Mcu	mitochondrial calcium uniporter	-1.98209	5.82059	-18.3149	4.68797e-16	2.74213e-14	26.7376
225908	Myrf	myelin regulatory factor	-5.10101	0.832694	-18.3501	4.72171e-16	2.75166e-14	26.7249
15976	Ifnar2	interferon (alpha and beta) receptor 2	1.71012	4.77865	18.2887	4.73787e-16	2.75166e-14	26.754
77286	Nkrf	NF-kappaB repressing factor	-1.65432	4.37347	-18.2856	4.75636e-16	2.75264e-14	26.7798
11433	Acp5	acid phosphatase 5, tartrate resistant	4.78842	3.2248	18.3228	4.88902e-16	2.81945e-14	26.7318
73804	Kif2c	kinesin family member 2C	-1.34941	5.86766	-18.2317	5.0976e-16	2.928e-14	26.6597
330050	Fam185a	family with sequence similarity 185, member A	-1.91271	4.44583	-18.2294	5.11301e-16	2.928e-14	26.7082
54525	Syt7	synaptotagmin VII	-5.17494	2.95072	-18.2722	5.21576e-16	2.97644e-14	26.4816
11566	Adss	adenylosuccinate synthetase, non muscle	-1.65742	8.29074	-18.1923	5.36333e-16	3.05002e-14	26.5597
57315	Wdr46	WD repeat domain 46	-1.87721	6.3067	-18.1134	5.94454e-16	3.36884e-14	26.4945
272396	Tarsl2	threonyl-tRNA synthetase-like 2	-1.97135	3.97641	-18.0846	6.16465e-16	3.48154e-14	26.526
94092	Trim16	tripartite motif-containing 16	-1.38887	6.29276	-18.0798	6.20305e-16	3.49119e-14	26.4531
15376	Foxa2	forkhead box A2	-4.64429	3.18481	-18.1269	6.28634e-16	3.52595e-14	26.3371
13992	Khdrbs3	KH domain containing, RNA binding, signal transduction associated 3	-4.73533	1.35509	-18.1214	6.33114e-16	3.53273e-14	26.3506
107071	Wdr74	WD repeat domain 74	-1.98483	6.114	-18.0862	6.34157e-16	3.53273e-14	26.4285
67920	Mak16	MAK16 homolog	-1.51788	6.33485	-18.0489	6.4568e-16	3.58473e-14	26.402
56456	Actl6a	actin-like 6A	-1.59409	6.65737	-18.0413	6.52096e-16	3.60812e-14	26.382
17161	Maoa	monoamine oxidase A	-2.58181	6.37743	-18.0952	6.54932e-16	3.61027e-14	26.4038
66977	Nuf2	NUF2, NDC80 kinetochore complex component	-1.90187	5.4765	-18.0356	6.56894e-16	3.61027e-14	26.4222
110750	Cse1l	chromosome segregation 1-like (S. cerevisiae)	-1.46545	8.47312	-18.0081	6.80808e-16	3.72353e-14	26.3169
57815	Spata5	spermatogenesis associated 5	-1.53273	5.62563	-18.0067	6.82049e-16	3.72353e-14	26.3753
225020	Fez2	fasciculation and elongation protein zeta 2 (zygin II)	-1.9066	7.23383	-18.0236	6.91993e-16	3.76527e-14	26.3215
68943	Pink1	PTEN induced putative kinase 1	1.7032	4.71574	17.9748	7.10958e-16	3.85565e-14	26.3788
103136	Pwp1	PWP1 homolog, endonuclein	-1.68589	6.10529	-17.9596	7.25218e-16	3.92e-14	26.2951
227210	Ccnyl1	cyclin Y-like 1	-1.45154	4.69491	-17.9551	7.29458e-16	3.92995e-14	26.325
17535	Mre11a	MRE11A homolog A, double strand break repair nuclease	-1.36517	5.55462	-17.9132	7.7053e-16	4.13762e-14	26.2481
240641	Kif20b	kinesin family member 20B	-2.25269	6.48213	-17.9129	8.29559e-16	4.44004e-14	26.1495
381306	BC055324	cDNA sequence BC055324	-1.75726	4.78822	-17.8422	8.45514e-16	4.51069e-14	26.1873
18432	Mybbp1a	MYB binding protein (P160) 1a	-2.00135	9.12889	-17.8915	8.53105e-16	4.53487e-14	26.0906
18393	Orc2	origin recognition complex, subunit 2	-2.1419	6.81676	-17.886	8.59243e-16	4.53487e-14	26.1124
21877	Tk1	thymidine kinase 1	-2.12398	6.49821	-17.8843	8.61093e-16	4.53487e-14	26.1057
67223	Rrp15	ribosomal RNA processing 15 homolog	-2.03763	5.56144	-17.8483	8.61122e-16	4.53487e-14	26.1406
68728	Trp53inp2	transformation related protein 53 inducible nuclear protein 2	2.66527	5.56957	17.8385	9.00803e-16	4.72864e-14	26.1501
216156	Wdr18	WD repeat domain 18	-1.50562	5.97343	-17.7891	9.06546e-16	4.74358e-14	26.0684
11432	Acp2	acid phosphatase 2, lysosomal	1.79913	5.55296	17.7796	9.18004e-16	4.78824e-14	26.0705
211389	Suox	sulfite oxidase	-1.76602	5.23411	-17.7265	9.84505e-16	5.1188e-14	26.0114
58175	Rgs20	regulator of G-protein signaling 20	-5.43584	1.0879	-17.7357	9.9739e-16	5.16938e-14	25.2551
66471	Anp32e	acidic (leucine-rich) nuclear phosphoprotein 32 family, member E	-1.05675	8.05122	-17.7094	1.00693e-15	5.20235e-14	25.919
12534	Cdk1	cyclin-dependent kinase 1	-2.64911	7.24366	-17.7387	1.04193e-15	5.36627e-14	25.9093
245688	Rbbp7	retinoblastoma binding protein 7, chromatin remodeling factor	-1.49498	8.23691	-17.6596	1.07536e-15	5.52109e-14	25.8523
29870	Gtse1	G two S phase expressed protein 1	-1.91514	5.19423	-17.6486	1.09115e-15	5.58465e-14	25.9275
78733	Troap	trophinin associated protein	-1.96996	5.00447	-17.643	1.09927e-15	5.60866e-14	25.9209
12649	Chek1	checkpoint kinase 1	-1.87787	4.97285	-17.6403	1.10315e-15	5.61101e-14	25.9202
19075	Prim1	DNA primase, p49 subunit	-2.42131	5.47612	-17.6851	1.11796e-15	5.66872e-14	25.888
67203	Nde1	nudE neurodevelopment protein 1	-1.1325	6.35608	-17.6268	1.12304e-15	5.67691e-14	25.8305
69499	Tsr2	TSR2 20S rRNA accumulation	-2.15792	4.74218	-17.6149	1.16146e-15	5.85305e-14	25.8708
72981	Thap12	THAP domain containing 12	-1.50192	6.77794	-17.5921	1.17605e-15	5.90837e-14	25.7807
63959	Slc29a1	solute carrier family 29 (nucleoside transporters), member 1	-2.57632	7.42055	-17.6268	1.20731e-15	6.0469e-14	25.75
53414	Bysl	bystin-like	-1.75586	6.0926	-17.5691	1.21248e-15	6.05429e-14	25.7777
20148	Dhrs3	dehydrogenase/reductase (SDR family) member 3	5.56244	1.01584	17.5844	1.27693e-15	6.35673e-14	25.646
14056	Ezh2	enhancer of zeste 2 polycomb repressive complex 2 subunit	-1.01556	6.46935	-17.5173	1.29902e-15	6.44709e-14	25.6875
71365	Pdss2	prenyl (solanesyl) diphosphate synthase, subunit 2	-1.85087	3.25446	-17.5099	1.31181e-15	6.49086e-14	25.7722
72778	Dnajc22	DnaJ heat shock protein family (Hsp40) member C22	-4.30292	2.22771	-17.5559	1.32609e-15	6.53799e-14	25.707
20438	Siah1b	siah E3 ubiquitin protein ligase 1B	-2.70374	3.98448	-17.5396	1.32931e-15	6.53799e-14	25.7651
17216	Mcm2	minichromosome maintenance complex component 2	-1.8022	7.15422	-17.4979	1.36276e-15	6.68241e-14	25.6327
216987	Utp6	UTP6 small subunit processome component	-1.02014	6.75766	-17.4744	1.37553e-15	6.72401e-14	25.6194
217431	Nol10	nucleolar protein 10	-1.46335	5.57346	-17.4714	1.38092e-15	6.72401e-14	25.6573
16905	Lmna	lamin A	-1.74047	9.79977	-17.4883	1.38421e-15	6.72401e-14	25.5948
381101	Dnph1	2'-deoxynucleoside 5'-phosphate N-hydrolase 1	-2.39639	5.16886	-17.5207	1.38766e-15	6.72401e-14	25.6929
20810	Srm	spermidine synthase	-2.37471	6.72753	-17.5145	1.40094e-15	6.76833e-14	25.6202
110816	Pwp2	PWP2 periodic tryptophan protein homolog (yeast)	-1.58574	6.08594	-17.4583	1.40528e-15	6.76934e-14	25.6232
224250	Cldnd1	claudin domain containing 1	-1.59092	6.41906	-17.4542	1.41311e-15	6.78705e-14	25.5959
218973	Wdhd1	WD repeat and HMG-box DNA binding protein 1	-2.20578	5.61171	-17.4946	1.43858e-15	6.88921e-14	25.6225
12842	Col1a1	collagen, type I, alpha 1	7.0916	2.64979	17.4312	1.56516e-15	7.46734e-14	25.57
224092	Lsg1	large 60S subunit nuclear export GTPase 1	-1.1706	6.05621	-17.3763	1.56842e-15	7.46734e-14	25.5076
384275	Gm5297	predicted gene 5297	-2.01565	3.9116	-17.3555	1.61266e-15	7.65567e-14	25.5714
52009	Jpt2	Jupiter microtubule associated homolog 2	-1.21307	7.55763	-17.3504	1.62387e-15	7.68662e-14	25.4405
214901	Chtf18	CTF18, chromosome transmission fidelity factor 18	-2.05907	4.56969	-17.3346	1.65862e-15	7.80806e-14	25.5194
208968	Zfp280c	zinc finger protein 280C	-1.80933	5.11897	-17.3344	1.65906e-15	7.80806e-14	25.4844
14620	Gjb3	gap junction protein, beta 3	-2.18566	5.95211	-17.3753	1.68663e-15	7.9151e-14	25.4499
22772	Zic2	zinc finger protein of the cerebellum 2	-6.37598	0.761654	-17.3585	1.72489e-15	8.05957e-14	24.619
18861	Pms2	PMS1 homolog2, mismatch repair system component	-1.32906	4.62548	-17.3045	1.72726e-15	8.05957e-14	25.4774
234865	Nup133	nucleoporin 133	-1.2829	6.69465	-17.2892	1.76313e-15	8.20357e-14	25.3703
243771	Parp12	poly (ADP-ribose) polymerase family, member 12	3.76356	4.13161	17.3347	1.78082e-15	8.26239e-14	25.4265
78789	Vsig1	V-set and immunoglobulin domain containing 1	-8.4452	-1.04188	-17.2892	1.8929e-15	8.74639e-14	23.7959
19730	Ralgds	ral guanine nucleotide dissociation stimulator	2.35068	6.1184	17.288	1.89582e-15	8.74639e-14	25.3505
20856	Stc2	stanniocalcin 2	-4.48447	2.44637	-17.2304	1.9087e-15	8.78108e-14	24.8057
12021	Bard1	BRCA1 associated RING domain 1	-1.58362	4.99551	-17.2226	1.9288e-15	8.84872e-14	25.3485
67374	Jam2	junction adhesion molecule 2	-2.22072	5.75304	-17.2606	1.96697e-15	8.99863e-14	25.3156
102920	Cenpi	centromere protein I	-2.03834	4.99631	-17.2123	1.99268e-15	9.09082e-14	25.3136
53610	Nono	non-POU-domain-containing, octamer binding protein	-1.06539	8.58749	-17.1955	2.00088e-15	9.1029e-14	25.2184
78895	Pus7l	pseudouridylate synthase 7-like	-1.41939	3.87191	-17.1893	2.01782e-15	9.15454e-14	25.3405
19361	Rad51	RAD51 recombinase	-1.88991	6.18939	-17.2032	2.02917e-15	9.18057e-14	25.259
20911	Stxbp2	syntaxin binding protein 2	1.13641	6.35336	17.1566	2.10925e-15	9.51663e-14	25.1974
70423	Tspan15	tetraspanin 15	-3.149	3.57827	-17.2028	2.12617e-15	9.56659e-14	25.2995
107094	Rrp12	ribosomal RNA processing 12 homolog	-2.13725	6.10275	-17.1879	2.16947e-15	9.73469e-14	25.1885
109077	Ints5	integrator complex subunit 5	-1.41658	6.08709	-17.1275	2.19401e-15	9.81788e-14	25.1638
100503394	Gm17494	predicted gene, 17494	-3.11542	1.99696	-17.1092	2.24941e-15	1.00276e-13	24.8835
17245	Mdm1	transformed mouse 3T3 cell double minute 1	-1.59263	3.68756	-17.108	2.25313e-15	1.00276e-13	25.2288
70472	Atad2	ATPase family, AAA domain containing 2	-1.57257	7.59882	-17.0998	2.27839e-15	1.01126e-13	25.096
18807	Pld3	phospholipase D family, member 3	3.07633	5.19053	17.144	2.302e-15	1.01898e-13	25.1919
23918	Impdh2	inosine monophosphate dehydrogenase 2	-1.59452	7.54043	-17.0711	2.36886e-15	1.04575e-13	25.0581
69077	Psmd11	proteasome (prosome, macropain) 26S subunit, non-ATPase, 11	-1.07743	7.25708	-17.0667	2.38307e-15	1.04919e-13	25.0581
68743	Anln	anillin, actin binding protein	-1.77779	7.89109	-17.0864	2.40409e-15	1.05561e-13	25.0405
21384	Tbx15	T-box 15	-5.89406	1.48214	-17.0993	2.44566e-15	1.07099e-13	24.546
69787	Anxa13	annexin A13	-4.17266	0.0347591	-16.9926	2.63664e-15	1.15155e-13	24.5443
22154	Tubb5	tubulin, beta 5 class I	-1.26325	8.71589	-16.9887	2.65085e-15	1.15467e-13	24.9321
57376	Smarce1	SWI/SNF related, matrix associated, actin dependent regulator of chromatin, subfamily e, member 1	-1.30593	7.10351	-16.9775	2.6917e-15	1.16936e-13	24.9324
56390	Znrd2	zinc ribbon domain containing 2	-2.34418	5.11603	-17.0248	2.70598e-15	1.17245e-13	25.012
66409	Rsl1d1	ribosomal L1 domain containing 1	-2.06348	8.31299	-17.0067	2.77321e-15	1.19841e-13	24.8934
228913	Zfp217	zinc finger protein 217	2.40805	5.50189	16.9975	2.80831e-15	1.21038e-13	24.9814
67291	Ccdc137	coiled-coil domain containing 137	-1.42286	5.74979	-16.9393	2.83616e-15	1.21918e-13	24.9348
12192	Zfp36l1	zinc finger protein 36, C3H type-like 1	2.85278	6.22358	16.9751	2.8954e-15	1.24138e-13	24.895
56367	Scoc	short coiled-coil protein	-2.06844	5.43394	-16.9728	2.90459e-15	1.24207e-13	24.8971
68606	Ppm1f	protein phosphatase 1F (PP2C domain containing)	-1.66835	5.64694	-16.899	2.99763e-15	1.27852e-13	24.8548
20878	Aurka	aurora kinase A	-1.6474	6.54962	-16.8911	3.03022e-15	1.28906e-13	24.8336
18148	Npm1	nucleophosmin 1	-2.55835	10.8678	-16.9314	3.07348e-15	1.30408e-13	24.7911
16855	Lgals4	lectin, galactose binding, soluble 4	-4.20842	3.45075	-16.9244	3.10307e-15	1.31323e-13	24.8786
14208	Ppm1g	protein phosphatase 1G (formerly 2C), magnesium-dependent, gamma isoform	-1.25633	8.11255	-16.8707	3.11663e-15	1.31557e-13	24.7708
66282	Tma16	translation machinery associated 16	-2.02118	4.3034	-16.8459	3.22462e-15	1.35766e-13	24.869
70247	Psmd1	proteasome (prosome, macropain) 26S subunit, non-ATPase, 1	-1.06743	8.33669	-16.8295	3.2984e-15	1.38516e-13	24.7111
74244	Atg7	autophagy related 7	1.31905	5.34531	16.8257	3.31569e-15	1.38886e-13	24.7945
216001	Micu1	mitochondrial calcium uptake 1	-1.06842	6.1308	-16.7992	3.43923e-15	1.43693e-13	24.7004
108000	Cenpf	centromere protein F	-1.92036	6.65676	-16.8296	3.50158e-15	1.45926e-13	24.6857
77782	Polq	polymerase (DNA directed), theta	-2.04672	3.82887	-16.7781	3.54095e-15	1.47192e-13	24.7778
216766	Gemin5	gem nuclear organelle associated protein 5	-1.69982	6.41127	-16.756	3.6504e-15	1.51357e-13	24.6452
14621	Gjb4	gap junction protein, beta 4	-2.34935	5.45928	-16.7819	3.77313e-15	1.56051e-13	24.6765
21682	Tec	tec protein tyrosine kinase	1.94457	4.82099	16.7278	3.79562e-15	1.56586e-13	24.7046
74778	Rrp7a	ribosomal RNA processing 7 homolog A	-1.17778	6.54964	-16.7059	3.91291e-15	1.61019e-13	24.57
21454	Tcp1	t-complex protein 1	-1.36246	8.72262	-16.7027	3.93001e-15	1.61318e-13	24.5308
21853	Timeless	timeless circadian clock 1	-1.73465	5.27294	-16.695	3.97217e-15	1.62641e-13	24.5978
192170	Eif4a3	eukaryotic translation initiation factor 4A3	-1.33905	7.34906	-16.6886	4.00775e-15	1.63688e-13	24.5228
74035	Nol9	nucleolar protein 9	-1.43421	6.28448	-16.6818	4.04574e-15	1.64829e-13	24.5423
71963	Cdca4	cell division cycle associated 4	-1.40917	6.16917	-16.6702	4.11184e-15	1.67106e-13	24.5339
240660	Slc35g1	solute carrier family 35, member G1	-1.77011	3.75864	-16.6575	4.18474e-15	1.69648e-13	24.5954
100129	Gpr153	G protein-coupled receptor 153	3.66634	2.16649	16.6546	4.20196e-15	1.69826e-13	24.3749
20867	Stip1	stress-induced phosphoprotein 1	-1.26935	8.54685	-16.6532	4.20988e-15	1.69826e-13	24.4609
22770	Zhx1	zinc fingers and homeoboxes 1	2.84513	5.19296	16.6904	4.2812e-15	1.72279e-13	24.6035
20840	Stac	src homology three (SH3) and cysteine rich domain	-4.25243	1.69418	-16.6419	4.3336e-15	1.7396e-13	24.253
246086	Onecut3	one cut domain, family member 3	-5.05735	0.0996566	-16.6217	4.39842e-15	1.7613e-13	23.5746
20311	Cxcl5	chemokine (C-X-C motif) ligand 5	4.24244	3.22368	16.6498	4.52863e-15	1.80902e-13	24.5474
15469	Prmt1	protein arginine N-methyltransferase 1	-1.76364	7.7269	-16.6295	4.57435e-15	1.82284e-13	24.3872
75624	Metap1	methionyl aminopeptidase 1	-1.07835	7.00178	-16.5891	4.60279e-15	1.82972e-13	24.3887
54141	Spag5	sperm associated antigen 5	-1.69033	6.06897	-16.5704	4.72491e-15	1.87372e-13	24.395
68036	Zfp706	zinc finger protein 706	-1.22653	7.73044	-16.5572	4.81252e-15	1.90385e-13	24.3295
98415	Nucks1	nuclear casein kinase and cyclin-dependent kinase substrate 1	-1.44915	7.82513	-16.5355	4.96103e-15	1.95787e-13	24.2982
74030	Rin2	Ras and Rab interactor 2	1.76112	6.73663	16.5438	4.98606e-15	1.96302e-13	24.3368
15165	Hcn1	hyperpolarization activated cyclic nucleotide gated potassium channel 1	-7.5806	-3.54512	-16.5285	5.00936e-15	1.96747e-13	20.8103
72568	Lin9	lin-9 homolog (C. elegans)	-1.48462	5.02579	-16.5201	5.06911e-15	1.98617e-13	24.3803
72502	Cwf19l1	CWF19-like 1, cell cycle control (S. pombe)	-1.20788	4.43323	-16.4998	5.21529e-15	2.03857e-13	24.363
66953	Cdca7	cell division cycle associated 7	-1.44344	5.97081	-16.4818	5.34841e-15	2.08563e-13	24.2837
229302	Tm4sf4	transmembrane 4 superfamily member 4	-5.67493	2.1356	-16.5087	5.51086e-15	2.14387e-13	24.2776
100383	Bsdc1	BSD domain containing 1	1.38341	5.20485	16.4529	5.56974e-15	2.16164e-13	24.299
73666	Thoc3	THO complex 3	-1.17559	5.66083	-16.4475	5.61178e-15	2.17281e-13	24.2352
19335	Rab23	RAB23, member RAS oncogene family	-1.61062	4.81508	-16.4422	5.65392e-15	2.18396e-13	24.2831
20471	Six1	sine oculis-related homeobox 1	-3.90395	1.16923	-16.4251	5.79178e-15	2.23195e-13	23.8324
269023	Zfp608	zinc finger protein 608	2.37287	3.91166	16.4434	5.80917e-15	2.23339e-13	24.2867
18822	Plod1	procollagen-lysine, 2-oxoglutarate 5-dioxygenase 1	1.92763	5.53318	16.4456	5.85342e-15	2.24297e-13	24.1962
22196	Ube2i	ubiquitin-conjugating enzyme E2I	-1.28454	7.17597	-16.4166	5.86147e-15	2.24297e-13	24.1375
16211	Kpnb1	karyopherin (importin) beta 1	-1.57027	9.49167	-16.4116	5.92017e-15	2.26015e-13	24.1131
15395	Hoxa10	homeobox A10	-8.42655	-4.07065	-16.4058	5.95797e-15	2.26403e-13	21.314
19141	Lgmn	legumain	4.05918	6.18555	16.4529	5.95798e-15	2.26403e-13	24.1719
65964	Map3k20	mitogen-activated protein kinase kinase kinase 20	-1.75906	7.40976	-16.4166	6.06419e-15	2.29752e-13	24.1181
380928	Lmo7	LIM domain only 7	-2.23435	7.59857	-16.4391	6.07416e-15	2.29752e-13	24.1099
52276	Cdca8	cell division cycle associated 8	-1.47802	6.198	-16.3822	6.15199e-15	2.32159e-13	24.1217
74764	Klc4	kinesin light chain 4	1.81006	4.3996	16.371	6.25045e-15	2.35333e-13	24.2117
236539	Phgdh	3-phosphoglycerate dehydrogenase	-2.3201	8.81416	-16.3854	6.54946e-15	2.46025e-13	24.019
217695	Zfyve1	zinc finger, FYVE domain containing 1	1.99961	4.27492	16.3297	6.62536e-15	2.48307e-13	24.1657
108037	Shmt2	serine hydroxymethyltransferase 2 (mitochondrial)	-1.74363	7.45865	-16.3552	6.64674e-15	2.48539e-13	24.0179
229504	Isg20l2	interferon stimulated exonuclease gene 20-like 2	-0.94942	6.47944	-16.2749	7.15935e-15	2.66976e-13	23.9556
17219	Mcm6	minichromosome maintenance complex component 6	-1.3026	8.25983	-16.2737	7.17238e-15	2.66976e-13	23.9211
19387	Rangap1	RAN GTPase activating protein 1	-1.34572	8.40127	-16.2647	7.26381e-15	2.69766e-13	23.9075
80905	Polh	polymerase (DNA directed), eta (RAD 30 related)	-1.44871	4.99543	-16.2377	7.54796e-15	2.79473e-13	23.97
230073	Ddx58	DEAD/H box helicase 58	3.21411	4.33264	16.2836	7.55933e-15	2.79473e-13	24.0339
12466	Cct6a	chaperonin containing Tcp1, subunit 6a (zeta)	-1.33545	8.74735	-16.2145	7.80129e-15	2.87648e-13	23.8328
17067	Ly6c1	lymphocyte antigen 6 complex, locus C1	3.26098	5.03222	16.26	7.81557e-15	2.87648e-13	23.9327
14265	Fmr1	FMRP translational regulator 1	-1.36192	6.62687	-16.1994	7.97031e-15	2.92685e-13	23.8278
74153	Uba7	ubiquitin-like modifier activating enzyme 7	5.23742	2.01208	16.2394	8.04718e-15	2.94847e-13	23.5815
171543	Bmf	BCL2 modifying factor	3.36012	3.41637	16.2361	8.0841e-15	2.95539e-13	23.9715
22631	Ywhaz	tyrosine 3-monooxygenase/tryptophan 5-monooxygenase activation protein, zeta polypeptide	-1.27792	8.84524	-16.1848	8.13759e-15	2.96832e-13	23.7888
224171	Cip2a	cell proliferation regulating inhibitor of protein phosphatase 2A	-2.01187	6.72382	-16.2218	8.25052e-15	3.00282e-13	23.8
15384	Hnrnpab	heterogeneous nuclear ribonucleoprotein A/B	-1.42635	9.58884	-16.1657	8.36201e-15	3.03665e-13	23.7607
14630	Gclm	glutamate-cysteine ligase, modifier subunit	-1.45641	6.7123	-16.1615	8.41245e-15	3.04821e-13	23.7967
67834	Idh3a	isocitrate dehydrogenase 3 (NAD+) alpha	-1.33571	6.95301	-16.1532	8.51189e-15	3.07743e-13	23.7628
27407	Abcf2	ATP-binding cassette, sub-family F (GCN20), member 2	-1.1629	7.75891	-16.1504	8.54585e-15	3.08291e-13	23.7487
14972	H2-K1	histocompatibility 2, K1, K region	4.73384	7.78457	16.1894	8.63731e-15	3.10905e-13	23.7894
110173	Manba	mannosidase, beta A, lysosomal	1.78275	5.9435	16.1412	8.65895e-15	3.11001e-13	23.8113
11799	Birc5	baculoviral IAP repeat-containing 5	-1.99144	6.52098	-16.1782	8.77675e-15	3.14542e-13	23.7462
57750	Wdr12	WD repeat domain 12	-1.82432	6.10685	-16.1574	8.79669e-15	3.14568e-13	23.7618
21927	Tnfaip1	tumor necrosis factor, alpha-induced protein 1 (endothelial)	-0.937239	7.47374	-16.1246	8.86718e-15	3.16398e-13	23.7144
15903	Id3	inhibitor of DNA binding 3	-3.35476	5.08749	-16.1667	8.92138e-15	3.1764e-13	23.8365
75316	Taf1d	TATA-box binding protein associated factor, RNA polymerase I, D	-1.8381	6.54672	-16.1438	9.14747e-15	3.24983e-13	23.7038
56459	Sae1	SUMO1 activating enzyme subunit 1	-1.21929	7.3131	-16.0927	9.28067e-15	3.29002e-13	23.6668
407243	Tmem189	transmembrane protein 189	1.78469	6.32904	16.0792	9.67907e-15	3.42384e-13	23.6768
67619	Nob1	NIN1/RPN12 binding protein 1 homolog	-1.39283	6.29443	-16.0576	9.7591e-15	3.44471e-13	23.6436
57339	Jph1	junctophilin 1	-2.88498	3.27983	-16.0472	9.90524e-15	3.48877e-13	23.7129
14962	Cfb	complement factor B	5.55444	3.2745	16.0822	1.00614e-14	3.52999e-13	23.7303
67811	Poldip2	polymerase (DNA-directed), delta interacting protein 2	-1.2295	6.35442	-16.036	1.00654e-14	3.52999e-13	23.6121
64294	Itm2c	integral membrane protein 2C	1.77665	6.56521	16.0556	1.01702e-14	3.55913e-13	23.6044
50927	Nasp	nuclear autoantigenic sperm protein (histone-binding)	-1.86828	7.64362	-16.064	1.03267e-14	3.60621e-13	23.5616
18806	Pld2	phospholipase D2	1.42965	5.54373	16.0056	1.05156e-14	3.66435e-13	23.6144
54153	Rasa4	RAS p21 protein activator 4	2.45978	4.33006	16.0481	1.05634e-14	3.67318e-13	23.6664
14211	Smc2	structural maintenance of chromosomes 2	-1.91923	7.2354	-16.0464	1.05901e-14	3.67466e-13	23.5436
74747	Ddit4	DNA-damage-inducible transcript 4	2.53819	6.10946	16.0434	1.06357e-14	3.68268e-13	23.609
21917	Tmpo	thymopoietin	-1.27391	8.19434	-15.987	1.08002e-14	3.73176e-13	23.5022
69906	Slc25a32	solute carrier family 25, member 32	-1.41551	4.81176	-15.9801	1.09082e-14	3.76115e-13	23.6045
15951	Ifi204	interferon activated gene 204	2.97225	4.15347	15.9995	1.13252e-14	3.89674e-13	23.6034
72107	Dscc1	DNA replication and sister chromatid cohesion 1	-2.37138	3.00388	-15.9519	1.13602e-14	3.90058e-13	23.6328
14390	Gabpa	GA repeat binding protein, alpha	-1.03596	6.60323	-15.9426	1.15134e-14	3.94492e-13	23.4541
229937	Znhit6	zinc finger, HIT type 6	-1.72455	5.6198	-15.9398	1.15594e-14	3.9524e-13	23.5141
16469	Jrk	jerky	-2.08367	3.38075	-15.9366	1.16127e-14	3.96236e-13	23.6109
24064	Spry2	sprouty RTK signaling antagonist 2	-1.8135	5.23172	-15.9415	1.17437e-14	3.9987e-13	23.4995
66249	Pno1	partner of NOB1 homolog	-2.02305	6.5128	-15.9726	1.17705e-14	3.99953e-13	23.4542
17330	Minpp1	multiple inositol polyphosphate histidine phosphatase 1	-1.01245	6.02088	-15.9256	1.17992e-14	4.00099e-13	23.4455
67177	Cdt1	chromatin licensing and DNA replication factor 1	-2.03539	6.63393	-15.9384	1.23627e-14	4.18338e-13	23.4068
228608	Smox	spermine oxidase	1.60261	7.11977	15.8826	1.25551e-14	4.23975e-13	23.3865
12462	Cct3	chaperonin containing Tcp1, subunit 3 (gamma)	-1.40823	9.1837	-15.8691	1.28038e-14	4.31483e-13	23.3264
107260	Otub1	OTU domain, ubiquitin aldehyde binding 1	-1.22264	7.13668	-15.8544	1.30776e-14	4.39805e-13	23.3194
56174	Nagk	N-acetylglucosamine kinase	2.02398	4.46182	15.8485	1.31902e-14	4.42682e-13	23.458
235036	Ppan	peter pan homolog	-1.72557	6.08938	-15.8587	1.32585e-14	4.44064e-13	23.3502
66929	Asf1b	anti-silencing function 1B histone chaperone	-1.86879	5.83433	-15.8762	1.3289e-14	4.44179e-13	23.3601
52679	E2f7	E2F transcription factor 7	-2.48402	4.85628	-15.8396	1.42556e-14	4.75515e-13	23.3635
14719	Got2	glutamatic-oxaloacetic transaminase 2, mitochondrial	-1.33474	7.84431	-15.792	1.43169e-14	4.7659e-13	23.2204
18024	Nfe2l2	nuclear factor, erythroid derived 2, like 2	1.14952	7.62714	15.7827	1.45126e-14	4.81603e-13	23.2078
104662	Tsr1	TSR1 20S rRNA accumulation	-1.93942	6.64401	-15.8266	1.45263e-14	4.81603e-13	23.2466
14672	Gna11	guanine nucleotide binding protein, alpha 11	-1.45213	6.11817	-15.7728	1.47238e-14	4.87165e-13	23.2378
57741	Noc2l	NOC2 like nucleolar associated transcriptional repressor	-1.45939	7.13272	-15.7595	1.50097e-14	4.95622e-13	23.1819
245867	Pcmtd2	protein-L-isoaspartate (D-aspartate) O-methyltransferase domain containing 2	1.92391	5.13617	15.756	1.53869e-14	5.07055e-13	23.2568
67246	Resf1	retroelement silencing factor 1	2.14393	6.80524	15.7799	1.55408e-14	5.111e-13	23.1701
17069	Ly6e	lymphocyte antigen 6 complex, locus E	1.75798	9.22516	15.77	1.57665e-14	5.17076e-13	23.1192
216443	Mars1	methionine-tRNA synthetase 1	-1.44734	6.82138	-15.7249	1.57857e-14	5.17076e-13	23.1469
230376	Haus6	HAUS augmin-like complex, subunit 6	-1.54565	5.58428	-15.715	1.60168e-14	5.23599e-13	23.1821
68026	Pclaf	PCNA clamp associated factor	-2.13269	6.82205	-15.757	1.60667e-14	5.23927e-13	23.1237
75580	Zbtb4	zinc finger and BTB domain containing 4	2.46666	4.65613	15.7559	1.60908e-14	5.23927e-13	23.2628
52033	Pbk	PDZ binding kinase	-2.12355	5.68122	-15.7532	1.61544e-14	5.24953e-13	23.1648
74552	Nipal3	NIPA-like domain containing 3	2.00596	3.65143	15.7046	1.62603e-14	5.27334e-13	23.2742
13361	Dhfr	dihydrofolate reductase	-2.29623	5.71413	-15.7474	1.6292e-14	5.27334e-13	23.1676
26425	Nubp1	nucleotide binding protein 1	-1.52089	4.86575	-15.7008	1.63526e-14	5.28251e-13	23.1803
66293	Snhg16	small nucleolar RNA host gene 16	-1.98436	4.9732	-15.6801	1.74091e-14	5.61271e-13	23.1318
269536	Tex10	testis expressed gene 10	-0.98521	6.53256	-15.6453	1.7735e-14	5.70655e-13	23.0287
170768	Pfkfb3	6-phosphofructo-2-kinase/fructose-2,6-biphosphatase 3	2.85479	5.24979	15.6831	1.78882e-14	5.74458e-13	23.1362
68729	Trim37	tripartite motif-containing 37	-1.12984	6.37317	-15.6111	1.86467e-14	5.97642e-13	22.9808
27993	Imp4	IMP4, U3 small nucleolar ribonucleoprotein	-1.37408	6.15099	-15.6059	1.8788e-14	6.00994e-13	22.9817
17829	Muc1	mucin 1, transmembrane	3.21399	5.01481	15.643	1.8966e-14	6.05506e-13	23.0373
67160	Eef1g	eukaryotic translation elongation factor 1 gamma	-1.43978	9.92252	-15.586	1.93458e-14	6.16431e-13	22.9058
66251	Arfgap3	ADP-ribosylation factor GTPase activating protein 3	1.46496	5.0809	15.577	1.96018e-14	6.23374e-13	23.0117
227613	Tubb4b	tubulin, beta 4B class IVB	-1.43657	8.75139	-15.5726	1.97305e-14	6.25349e-13	22.8872
108062	Cstf2	cleavage stimulation factor, 3' pre-RNA subunit 2	-1.23998	6.66347	-15.5714	1.97656e-14	6.25349e-13	22.9094
20419	Shcbp1	Shc SH2-domain binding protein 1	-2.17183	5.08754	-15.6143	1.97784e-14	6.25349e-13	22.9988
237211	Fancb	Fanconi anemia, complementation group B	-2.74841	3.6805	-15.5954	2.03338e-14	6.41669e-13	23.0418
26364	Adgre5	adhesion G protein-coupled receptor E5	1.91338	6.73827	15.5879	2.0558e-14	6.46837e-13	22.8895
21681	Alyref	Aly/REF export factor	-1.95337	6.83221	-15.5873	2.05765e-14	6.46837e-13	22.873
77744	Bora	bora, aurora kinase A activator	-1.48166	4.86029	-15.5422	2.06324e-14	6.4735e-13	22.9662
80283	Abtb1	ankyrin repeat and BTB (POZ) domain containing 1	2.4494	2.77537	15.5322	2.09387e-14	6.55706e-13	23.0002
70052	Prpf4	pre-mRNA processing factor 4	-0.990721	5.61504	-15.5265	2.11164e-14	6.60007e-13	22.8878
319477	Insyn1	inhibitory synaptic factor 1	-2.6088	3.27705	-15.5223	2.1245e-14	6.62001e-13	23.0049
108960	Irak2	interleukin-1 receptor-associated kinase 2	1.62932	5.13502	15.5218	2.1261e-14	6.62001e-13	22.9042
68626	Elac2	elaC ribonuclease Z 2	-1.44579	5.41906	-15.5195	2.13354e-14	6.63057e-13	22.8834
12795	Plk3	polo like kinase 3	2.58928	5.28037	15.5517	2.16775e-14	6.72413e-13	22.9166
214854	Neurl3	neuralized E3 ubiquitin protein ligase 3	2.40516	5.91036	15.5306	2.23588e-14	6.92236e-13	22.8411
20753	Sprr1a	small proline-rich protein 1A	4.6211	5.27508	15.488	2.38042e-14	7.35035e-13	22.8993
21762	Psmd2	proteasome (prosome, macropain) 26S subunit, non-ATPase, 2	-0.96917	8.9604	-15.4446	2.3831e-14	7.35035e-13	22.6921
231807	Map11	microtubule associated protein 11	2.16655	4.67238	15.4747	2.39666e-14	7.3783e-13	22.8392
74041	Ddias	DNA damage-induced apoptosis suppressor	-1.95074	3.39709	-15.4202	2.47063e-14	7.59173e-13	22.8615
78308	Gpr108	G protein-coupled receptor 108	1.08861	5.49786	15.4129	2.49744e-14	7.65974e-13	22.7181
142980	Tlr3	toll-like receptor 3	3.26515	3.9672	15.453	2.50662e-14	7.67353e-13	22.8456
64934	Pes1	pescadillo ribosomal biogenesis factor 1	-1.28626	7.23212	-15.4073	2.51835e-14	7.69506e-13	22.6514
72157	Pgm1	phosphoglucomutase 1	1.59674	6.352	15.4023	2.55751e-14	7.80017e-13	22.6675
17475	Mpdz	multiple PDZ domain crumbs cell polarity complex component	-3.95787	3.65242	-15.4347	2.575e-14	7.83114e-13	22.8232
75317	Parpbp	PARP1 binding protein	-2.21009	3.54783	-15.3906	2.58145e-14	7.83114e-13	22.809
67065	Polr3d	polymerase (RNA) III (DNA directed) polypeptide D	-1.18938	5.24373	-15.3905	2.58201e-14	7.83114e-13	22.7077
14605	Tsc22d3	TSC22 domain family, member 3	2.86448	4.62704	15.4315	2.5873e-14	7.83269e-13	22.7425
72486	Obi1	ORC ubiquitin ligase 1	-2.26546	3.39292	-15.3951	2.62845e-14	7.94256e-13	22.7787
229524	Msto1	misato 1, mitochondrial distribution and morphology regulator	-1.37502	5.50835	-15.3765	2.63603e-14	7.9508e-13	22.6718
56412	Noa1	nitric oxide associated 1	-1.2734	5.41125	-15.3658	2.67825e-14	8.0633e-13	22.6515
66870	Serbp1	serpine1 mRNA binding protein 1	-1.12813	9.29146	-15.3592	2.70485e-14	8.12845e-13	22.5628
52696	Zwint	ZW10 interactor	-1.58149	6.67687	-15.3662	2.71813e-14	8.15339e-13	22.5939
98386	Lbr	lamin B receptor	-1.20595	7.17148	-15.3537	2.72684e-14	8.16456e-13	22.5689
70348	Ube2cbp	ubiquitin-conjugating enzyme E2C binding protein	-2.0264	2.63729	-15.3411	2.77855e-14	8.3042e-13	22.7241
269831	Tspan12	tetraspanin 12	-4.57276	2.88076	-15.368	2.84198e-14	8.47831e-13	22.702
12064	Bdnf	brain derived neurotrophic factor	-3.21839	3.78549	-15.3609	2.87214e-14	8.55272e-13	22.6586
56403	Syncrip	synaptotagmin binding, cytoplasmic RNA interacting protein	-1.05027	8.50324	-15.3156	2.88615e-14	8.57883e-13	22.4986
269582	Clspn	claspin	-2.09282	5.38723	-15.3437	2.94637e-14	8.74197e-13	22.5869
12189	Brca1	breast cancer 1, early onset	-1.70794	5.46359	-15.3016	2.97692e-14	8.81664e-13	22.5548
27214	Dbf4	DBF4 zinc finger	-1.42857	7.39524	-15.291	2.99394e-14	8.85104e-13	22.472
76574	Mfsd2a	major facilitator superfamily domain containing 2A	-3.7476	0.407427	-15.2737	3.07214e-14	9.06586e-13	22.217
66965	Ctu2	cytosolic thiouridylase subunit 2	-1.5113	5.34415	-15.2494	3.18572e-14	9.38413e-13	22.4905
23942	Mta2	metastasis-associated gene family, member 2	-0.966002	7.9569	-15.2422	3.22024e-14	9.46878e-13	22.3896
16192	Il5ra	interleukin 5 receptor, alpha	-6.7979	1.60857	-15.2765	3.25578e-14	9.55611e-13	22.5486
50995	Uba2	ubiquitin-like modifier activating enzyme 2	-1.28858	7.26675	-15.219	3.33432e-14	9.7662e-13	22.3628
97961	Nol12	nucleolar protein 12	-1.59676	5.44832	-15.218	3.33928e-14	9.7662e-13	22.4363
70779	Prdm5	PR domain containing 5	-2.45329	3.60027	-15.2161	3.40531e-14	9.94157e-13	22.5414
70385	Spdl1	spindle apparatus coiled-coil protein 1	-1.89002	4.79527	-15.214	3.42342e-14	9.97664e-13	22.4563
67880	Dcxr	dicarbonyl L-xylulose reductase	2.60492	1.48978	15.19	3.48248e-14	1.01307e-12	22.3921
51786	Cpsf2	cleavage and polyadenylation specific factor 2	-1.25447	6.71463	-15.1835	3.5163e-14	1.0211e-12	22.3224
19231	Ptma	prothymosin alpha	-1.27481	10.0125	-15.176	3.55634e-14	1.03018e-12	22.2852
50915	Grb14	growth factor receptor bound protein 14	-4.36956	1.23868	-15.1753	3.56015e-14	1.03018e-12	22.0606
103710	Slc35e4	solute carrier family 35, member E4	-1.78519	5.5083	-15.1872	3.59651e-14	1.03886e-12	22.3656
65963	Tmem176b	transmembrane protein 176B	1.73933	7.38156	15.2084	3.60356e-14	1.03907e-12	22.2862
30878	Apln	apelin	-2.20145	3.67731	-15.2002	3.6482e-14	1.05009e-12	22.412
67870	Enoph1	enolase-phosphatase 1	-1.41556	5.41455	-15.1308	3.80602e-14	1.0936e-12	22.2977
66926	Trmt6	tRNA methyltransferase 6	-1.25995	6.50636	-15.1248	3.84097e-14	1.10171e-12	22.2439
407821	Znrf3	zinc and ring finger 3	-2.10702	4.03841	-15.1285	3.86208e-14	1.10436e-12	22.3872
72080	Sapcd2	suppressor APC domain containing 2	-1.81408	4.24693	-15.1208	3.86371e-14	1.10436e-12	22.3777
17533	Mrc1	mannose receptor, C type 1	3.86505	6.38799	15.1583	3.88399e-14	1.10822e-12	22.2387
11307	Abcg1	ATP binding cassette subfamily G member 1	5.80378	2.49753	15.1532	3.91423e-14	1.11491e-12	22.2946
217203	Tmem106a	transmembrane protein 106A	4.83531	3.184	15.1425	3.97698e-14	1.13082e-12	22.3673
212377	Mms22l	MMS22-like, DNA repair protein	-1.50209	4.98414	-15.0938	4.02451e-14	1.14235e-12	22.2669
71876	Cenpu	centromere protein U	-1.96094	2.88494	-15.0679	4.18474e-14	1.18577e-12	22.3382
11739	Slc25a4	solute carrier family 25 (mitochondrial carrier, adenine nucleotide translocator), member 4	-1.98467	8.87127	-15.0717	4.42342e-14	1.25124e-12	22.0667
67895	Ppa1	pyrophosphatase (inorganic) 1	-1.88568	7.11972	-15.0666	4.45752e-14	1.25595e-12	22.0795
71804	Mtfr2	mitochondrial fission regulator 2	-2.1181	3.36839	-15.0255	4.46212e-14	1.25595e-12	22.2687
244373	Erlin2	ER lipid raft associated 2	1.08648	6.63349	15.0253	4.46306e-14	1.25595e-12	22.0926
52829	Lurap1l	leucine rich adaptor protein 1-like	-2.84445	3.94971	-15.0626	4.4846e-14	1.25984e-12	22.2339
77011	Ticrr	TOPBP1-interacting checkpoint and replication regulator	-2.45799	4.70494	-15.057	4.52278e-14	1.2647e-12	22.2104
74195	Elp3	elongator acetyltransferase complex subunit 3	-0.945567	5.6958	-15.0162	4.52492e-14	1.2647e-12	22.1068
66229	Rpl7l1	ribosomal protein L7-like 1	-1.31288	7.48554	-15.0162	4.52507e-14	1.2647e-12	22.0513
217109	Utp18	UTP18 small subunit processome component	-1.62625	6.57276	-15.033	4.55035e-14	1.2696e-12	22.0701
11676	Aldoc	aldolase C, fructose-bisphosphate	3.20119	3.05265	15.0409	4.6337e-14	1.29066e-12	22.2357
68145	Etaa1	Ewing tumor-associated antigen 1	-1.43651	4.93851	-14.9925	4.69018e-14	1.30417e-12	22.1361
28030	Gfm1	G elongation factor, mitochondrial 1	-1.08514	6.64701	-14.9866	4.73296e-14	1.31384e-12	22.0214
99890	Prmt6	protein arginine N-methyltransferase 6	-1.5399	4.35751	-14.9734	4.82806e-14	1.33797e-12	22.1334
380863	Tmem171	transmembrane protein 171	-2.55978	4.0397	-15.0001	4.9276e-14	1.362e-12	22.1592
56473	Fads2	fatty acid desaturase 2	-2.07778	5.69059	-14.9991	4.93543e-14	1.362e-12	22.0168
12892	Cpox	coproporphyrinogen oxidase	-1.14175	5.65401	-14.9584	4.93974e-14	1.362e-12	22.0335
22184	Zrsr2	zinc finger (CCCH type), RNA binding motif and serine/arginine rich 2	-1.05654	5.7405	-14.9531	4.97942e-14	1.36933e-12	21.9928
67574	Alg13	asparagine-linked glycosylation 13	-1.27773	4.42196	-14.9526	4.98303e-14	1.36933e-12	22.0753
276770	Eif5a	eukaryotic translation initiation factor 5A	-1.68702	10.3975	-14.9795	5.08379e-14	1.39395e-12	21.9256
12508	Cd53	CD53 antigen	6.81661	2.62113	14.9787	5.08966e-14	1.39395e-12	22.1032
68549	Sgo2a	shugoshin 2A	-1.75243	5.51659	-14.9519	5.14403e-14	1.40649e-12	21.9925
60599	Trp53inp1	transformation related protein 53 inducible nuclear protein 1	6.19166	3.25103	14.9678	5.17433e-14	1.41242e-12	21.7645
71952	Riox1	ribosomal oxygenase 1	-1.66408	3.95537	-14.9232	5.21076e-14	1.42e-12	22.0825
19357	Rad21	RAD21 cohesin complex component	-0.973003	8.68928	-14.9192	5.24273e-14	1.42563e-12	21.8881
22256	Ung	uracil DNA glycosylase	-1.52013	4.57429	-14.9185	5.24885e-14	1.42563e-12	22.0281
15229	Foxd1	forkhead box D1	-7.65753	-0.237793	-14.953	5.29147e-14	1.43483e-12	20.6092
16475	Ajuba	ajuba LIM protein	-1.91085	6.71513	-14.9382	5.4121e-14	1.46511e-12	21.8913
16432	Itm2b	integral membrane protein 2B	1.94358	8.40596	14.9339	5.44726e-14	1.4722e-12	21.8552
108052	Slc14a1	solute carrier family 14 (urea transporter), member 1	-3.77008	1.62979	-14.9169	5.58949e-14	1.50815e-12	22.055
622675	Zfp827	zinc finger protein 827	-2.68054	3.57646	-14.9064	5.67888e-14	1.52975e-12	22.0173
68119	Cmtm3	CKLF-like MARVEL transmembrane domain containing 3	1.5266	6.40736	14.8585	5.75701e-14	1.54825e-12	21.8429
54160	Copg2	coatomer protein complex, subunit gamma 2	1.04537	5.66753	14.8559	5.77438e-14	1.55037e-12	21.8722
12469	Cct8	chaperonin containing Tcp1, subunit 8 (theta)	-1.38964	9.17713	-14.8518	5.81084e-14	1.55761e-12	21.7825
54392	Ncapg	non-SMC condensin I complex, subunit G	-1.7039	6.1635	-14.8771	5.85455e-14	1.56676e-12	21.8312
68612	Ube2c	ubiquitin-conjugating enzyme E2C	-2.22863	7.27754	-14.8796	5.91535e-14	1.58045e-12	21.8001
12236	Bub1b	BUB1B, mitotic checkpoint serine/threonine kinase	-1.2502	7.09688	-14.8388	5.92699e-14	1.58098e-12	21.7832
19891	Rpa2	replication protein A2	-1.65917	5.59466	-14.8456	5.95717e-14	1.58645e-12	21.8422
64424	Polr1e	polymerase (RNA) I polypeptide E	-1.57066	4.73839	-14.8326	5.98324e-14	1.5908e-12	21.9004
80744	Cwc22	CWC22 spliceosome-associated protein	-0.963771	6.21817	-14.8303	6.00451e-14	1.59387e-12	21.799
51788	H2az1	H2A.Z variant histone 1	-2.12443	7.29413	-14.8625	6.07108e-14	1.60893e-12	21.7583
93737	Pard6g	par-6 family cell polarity regulator gamma	-2.86994	2.39167	-14.8172	6.12644e-14	1.62098e-12	21.9036
67629	Spc24	SPC24, NDC80 kinetochore complex component, homolog (S. cerevisiae)	-1.83839	3.85256	-14.8149	6.14725e-14	1.62387e-12	21.9209
237823	Pfas	phosphoribosylformylglycinamidine synthase (FGAR amidotransferase)	-1.76491	6.33472	-14.8533	6.15718e-14	1.62387e-12	21.7782
67111	Naaa	N-acylethanolamine acid amidase	2.89483	5.60572	14.841	6.27335e-14	1.65185e-12	21.81
22042	Tfrc	transferrin receptor	-2.20852	8.84786	-14.8358	6.32305e-14	1.66226e-12	21.7026
213582	Map9	microtubule-associated protein 9	-4.632	1.95399	-14.8036	6.37163e-14	1.67235e-12	21.4761
230737	Gnl2	guanine nucleotide binding protein-like 2 (nucleolar)	-1.08111	6.7366	-14.7845	6.4404e-14	1.68769e-12	21.7134
53333	Tomm40	translocase of outer mitochondrial membrane 40	-1.61702	6.41561	-14.7977	6.5371e-14	1.7103e-12	21.7023
13340	Slc29a2	solute carrier family 29 (nucleoside transporters), member 2	-1.857	4.22164	-14.771	6.57524e-14	1.71753e-12	21.8351
68591	Mocos	molybdenum cofactor sulfurase	3.09252	2.91653	14.7831	6.5953e-14	1.72003e-12	21.8638
216859	Acap1	ArfGAP with coiled-coil, ankyrin repeat and PH domains 1	5.57173	2.02624	14.8023	6.65518e-14	1.73288e-12	21.31
17311	Kitl	kit ligand	-3.34077	3.53138	-14.7948	6.73168e-14	1.75002e-12	21.7547
57773	Wdr4	WD repeat domain 4	-1.10695	6.04619	-14.751	6.78075e-14	1.75999e-12	21.6851
21452	Tcn2	transcobalamin 2	6.88307	3.26197	14.7889	6.79253e-14	1.76026e-12	21.5543
71707	Ubiad1	UbiA prenyltransferase domain containing 1	-1.29601	4.56855	-14.7417	6.87836e-14	1.77968e-12	21.7685
19385	Ranbp1	RAN binding protein 1	-2.00943	7.83909	-14.7575	7.12613e-14	1.84088e-12	21.5863
50911	Exosc9	exosome component 9	-1.94464	5.46793	-14.7469	7.2434e-14	1.86823e-12	21.6475
69470	Tmem127	transmembrane protein 127	0.925728	6.92569	14.7045	7.2827e-14	1.87541e-12	21.5844
79456	Recql4	RecQ protein-like 4	-2.36795	4.53837	-14.74	7.32025e-14	1.88212e-12	21.7421
54651	Usp27x	ubiquitin specific peptidase 27, X chromosome	-1.58097	3.41579	-14.6971	7.36686e-14	1.89114e-12	21.7732
671535	Parp10	poly (ADP-ribose) polymerase family, member 10	2.54684	4.1604	14.7268	7.47008e-14	1.91463e-12	21.7521
69902	Mrto4	mRNA turnover 4, ribosome maturation factor	-1.76825	6.24565	-14.7029	7.74922e-14	1.98307e-12	21.5423
18141	Nup50	nucleoporin 50	-1.00714	7.17465	-14.6631	7.76272e-14	1.98343e-12	21.5053
16563	Kif2a	kinesin family member 2A	-1.11592	6.44462	-14.662	7.77579e-14	1.98367e-12	21.5274
171508	Creld1	cysteine-rich with EGF-like domains 1	1.68412	5.2048	14.6542	7.87079e-14	2.00176e-12	21.6173
22329	Vcam1	vascular cell adhesion molecule 1	5.13799	2.54773	14.6927	7.87112e-14	2.00176e-12	21.7148
11883	Arsa	arylsulfatase A	1.51837	4.82258	14.6285	8.18922e-14	2.07943e-12	21.5436
22003	Tpm1	tropomyosin 1, alpha	-1.73416	9.28166	-14.6659	8.20252e-14	2.07958e-12	21.4355
67187	Zmynd19	zinc finger, MYND domain containing 19	-1.43773	6.02652	-14.6209	8.2861e-14	2.09752e-12	21.4985
12227	Btg2	BTG anti-proliferation factor 2	5.02697	4.90166	14.6552	8.33788e-14	2.10562e-12	21.6138
80750	N4bp1	NEDD4 binding protein 1	1.24242	6.13485	14.6164	8.3438e-14	2.10562e-12	21.4603
170439	Elovl6	ELOVL family member 6, elongation of long chain fatty acids (yeast)	-1.73843	5.76196	-14.6534	8.36099e-14	2.10671e-12	21.4511
16362	Irf1	interferon regulatory factor 1	2.34217	5.26879	14.6405	8.52993e-14	2.14598e-12	21.4935
192285	Phf21a	PHD finger protein 21A	2.03403	5.13625	14.6319	8.64256e-14	2.17098e-12	21.5166
66180	P3h4	prolyl 3-hydroxylase family member 4 (non-enzymatic)	-3.10182	1.58998	-14.6273	8.70401e-14	2.18307e-12	21.6131
332397	Nanos1	nanos C2HC-type zinc finger 1	-2.07427	3.49114	-14.5838	8.77586e-14	2.19772e-12	21.5953
67949	Nifk	nucleolar protein interacting with the FHA domain of MKI67	-1.77574	6.65378	-14.6168	8.84675e-14	2.21209e-12	21.3911
83383	Tfap4	transcription factor AP4	-1.69555	4.13865	-14.5702	8.96384e-14	2.23795e-12	21.5051
13386	Dlk1	delta like non-canonical Notch ligand 1	-9.29236	-2.57226	-14.6068	8.9845e-14	2.2397e-12	19.6146
15260	Hira	histone cell cycle regulator	-1.14595	6.08235	-14.563	9.0633e-14	2.25591e-12	21.376
22123	Psmd3	proteasome (prosome, macropain) 26S subunit, non-ATPase, 3	-1.20329	7.55064	-14.5616	9.08417e-14	2.25767e-12	21.3378
12576	Cdkn1b	cyclin-dependent kinase inhibitor 1B	1.13302	5.6157	14.5506	9.23986e-14	2.29288e-12	21.3761
22695	Zfp36	zinc finger protein 36	3.81599	6.46856	14.5874	9.2574e-14	2.29376e-12	21.3569
50527	Ero1a	endoplasmic reticulum oxidoreductase 1 alpha	1.68736	6.43425	14.5768	9.33902e-14	2.31049e-12	21.3508
66912	Bzw2	basic leucine zipper and W2 domains 2	-1.65267	6.38717	-14.5687	9.4294e-14	2.32735e-12	21.3325
20174	Ruvbl2	RuvB-like protein 2	-1.36681	6.93294	-14.5371	9.43558e-14	2.32735e-12	21.3148
69596	Ap5s1	adaptor-related protein 5 complex, sigma 1 subunit	1.7859	3.62006	14.5339	9.48312e-14	2.33556e-12	21.5271
70383	Cox10	heme A:farnesyltransferase cytochrome c oxidase assembly factor 10	-1.42713	4.48185	-14.5313	9.52079e-14	2.34131e-12	21.4401
18641	Pfkl	phosphofructokinase, liver, B-type	1.32295	7.17023	14.5208	9.6783e-14	2.37648e-12	21.2777
213211	Rnf26	ring finger protein 26	-1.22914	5.1289	-14.5154	9.75989e-14	2.39293e-12	21.3613
230484	Usp1	ubiquitin specific peptidase 1	-1.36332	6.50985	-14.5079	9.8744e-14	2.41738e-12	21.2685
72162	Dhx36	DEAH (Asp-Glu-Ala-His) box polypeptide 36	-1.07685	6.83077	-14.4961	1.00572e-13	2.45519e-12	21.2464
16564	Kif21a	kinesin family member 21A	-5.69378	2.39361	-14.5337	1.00588e-13	2.45519e-12	21.2863
235559	Topbp1	topoisomerase (DNA) II binding protein 1	-1.47109	7.41958	-14.4783	1.05512e-13	2.56804e-12	21.1898
70466	Ckap2l	cytoskeleton associated protein 2-like	-1.1584	6.64976	-14.4653	1.05525e-13	2.56804e-12	21.216
319272	A130077B15Rik	RIKEN cDNA A130077B15 gene	8.05284	-5.04927	14.4489	1.08247e-13	2.63038e-12	16.5673
70767	Prpf3	pre-mRNA processing factor 3	-0.895692	6.36168	-14.4459	1.08762e-13	2.63583e-12	21.1859
73173	Pcdh18	protocadherin 18	-3.91515	0.774042	-14.4832	1.08793e-13	2.63583e-12	21.3849
235461	Mindy2	MINDY lysine 48 deubiquitinase 2	2.62209	4.53794	14.4791	1.09496e-13	2.64893e-12	21.3317
21817	Tgm2	transglutaminase 2, C polypeptide	7.72897	5.57509	14.4754	1.10125e-13	2.66022e-12	21.3478
107765	Ankrd1	ankyrin repeat domain 1 (cardiac muscle)	-1.97901	8.18599	-14.4615	1.12529e-13	2.71429e-12	21.1221
22185	U2af2	U2 small nuclear ribonucleoprotein auxiliary factor (U2AF) 2	-1.06182	7.85634	-14.4139	1.14349e-13	2.75412e-12	21.0972
17939	Naga	N-acetyl galactosaminidase, alpha	2.10153	4.52728	14.4369	1.16929e-13	2.81214e-12	21.2396
71919	Rpap3	RNA polymerase II associated protein 3	-1.31107	5.2705	-14.3914	1.18448e-13	2.84316e-12	21.1682
233875	Ino80e	INO80 complex subunit E	-1.47512	4.90332	-14.3907	1.18566e-13	2.84316e-12	21.184
18438	P2rx4	purinergic receptor P2X, ligand-gated ion channel 4	2.79649	4.81674	14.4261	1.18899e-13	2.84696e-12	21.2179
22330	Vcl	vinculin	-1.80965	8.30808	-14.4204	1.1997e-13	2.86842e-12	21.0498
21816	Tgm1	transglutaminase 1, K polypeptide	6.24865	1.30097	14.4106	1.21822e-13	2.90846e-12	20.4414
11702	Amd1	S-adenosylmethionine decarboxylase 1	-1.20383	6.65405	-14.3661	1.23239e-13	2.938e-12	21.0469
226830	Smyd2	SET and MYND domain containing 2	-1.34763	6.13547	-14.3573	1.24939e-13	2.9742e-12	21.0542
12607	Cebpz	CCAAT/enhancer binding protein zeta	-1.13324	7.06449	-14.3457	1.2725e-13	3.02482e-12	21.0041
18035	Nfkbia	nuclear factor of kappa light polypeptide gene enhancer in B cells inhibitor, alpha	2.8242	6.27649	14.3811	1.27563e-13	3.02556e-12	21.0496
81018	Rnf114	ring finger protein 114	1.1396	6.70394	14.3437	1.27651e-13	3.02556e-12	21.0273
54720	Rcan1	regulator of calcineurin 1	2.34837	4.62849	14.3765	1.28478e-13	3.04076e-12	21.1541
77110	Gpbp1l1	GC-rich promoter binding protein 1-like 1	1.22064	5.71303	14.3313	1.30151e-13	3.07593e-12	21.0454
66849	Ppp1r2	protein phosphatase 1, regulatory inhibitor subunit 2	-1.12592	7.08453	-14.3238	1.31702e-13	3.10809e-12	20.9694
72198	Mtrex	Mtr4 exosome RNA helicase	-1.0714	7.02878	-14.3223	1.32004e-13	3.11074e-12	20.966
72982	Tmem138	transmembrane protein 138	-1.40666	4.32978	-14.3205	1.32384e-13	3.11521e-12	21.0773
100217453	Snord16a	small nucleolar RNA, C/D box 16A	-2.9582	1.46623	-14.3196	1.32578e-13	3.1153e-12	21.0161
104174	Gldc	glycine decarboxylase	-4.39597	1.44399	-14.3491	1.34099e-13	3.14653e-12	21.1247
83766	Actl6b	actin-like 6B	-5.91847	-5.93989	-14.3043	1.35807e-13	3.17976e-12	17.9063
207214	Larp4	La ribonucleoprotein domain family, member 4	-1.20164	7.88773	-14.3038	1.35904e-13	3.17976e-12	20.922
66375	Dhrs7	dehydrogenase/reductase (SDR family) member 7	1.90425	4.26885	14.3021	1.36263e-13	3.18361e-12	21.1341
73296	Rhobtb3	Rho-related BTB domain containing 3	-1.90504	5.84124	-14.3321	1.37726e-13	3.21322e-12	20.9878
70099	Smc4	structural maintenance of chromosomes 4	-1.07794	8.11067	-14.2938	1.38072e-13	3.21669e-12	20.9029
108707	Fam207a	family with sequence similarity 207, member A	-1.17195	5.50867	-14.291	1.3868e-13	3.22627e-12	20.9843
433813	Pusl1	pseudouridylate synthase-like 1	-1.35807	3.98969	-14.2813	1.40814e-13	3.27127e-12	21.0728
68385	Tlcd1	TLC domain containing 1	-1.79133	4.06874	-14.2789	1.41351e-13	3.27594e-12	21.0887
21849	Trim28	tripartite motif-containing 28	-1.15997	8.40244	-14.2786	1.41415e-13	3.27594e-12	20.8762
58801	Pmaip1	phorbol-12-myristate-13-acetate-induced protein 1	2.79123	6.00297	14.3135	1.41793e-13	3.27949e-12	21.012
75475	Oplah	5-oxoprolinase (ATP-hydrolysing)	4.18871	2.46568	14.3073	1.41968e-13	3.27949e-12	20.9483
56307	Metap2	methionine aminopeptidase 2	-1.17293	7.94886	-14.2694	1.43472e-13	3.30956e-12	20.8646
14105	Srsf10	serine and arginine-rich splicing factor 10	-1.10672	7.6576	-14.2683	1.43736e-13	3.31099e-12	20.8647
71988	Esco2	establishment of sister chromatid cohesion N-acetyltransferase 2	-2.15435	4.78745	-14.2975	1.454e-13	3.3446e-12	21.012
68971	Tamm41	TAM41 mitochondrial translocator assembly and maintenance homolog	-1.30949	4.23773	-14.2553	1.46711e-13	3.37003e-12	21.0097
11534	Adk	adenosine kinase	-1.81699	6.23626	-14.2847	1.4835e-13	3.40291e-12	20.8869
76477	Pcolce2	procollagen C-endopeptidase enhancer 2	-3.03223	4.64031	-14.2774	1.5006e-13	3.43312e-12	20.9899
68493	Ndufaf4	NADH:ubiquinone oxidoreductase complex assembly factor 4	-2.0155	5.04707	-14.2773	1.50086e-13	3.43312e-12	20.9247
13841	Epha7	Eph receptor A7	-5.14359	-0.442416	-14.24	1.5241e-13	3.4814e-12	20.3569
15366	Hmmr	hyaluronan mediated motility receptor (RHAMM)	-1.85599	6.514	-14.2655	1.529e-13	3.48773e-12	20.8443
207683	Igsf11	immunoglobulin superfamily, member 11	-3.8346	3.9555	-14.2642	1.53209e-13	3.48906e-12	21.0556
74107	Cep55	centrosomal protein 55	-1.79544	5.87218	-14.2632	1.53443e-13	3.48906e-12	20.8632
66905	Plin3	perilipin 3	1.22152	6.58864	14.2262	1.53597e-13	3.48906e-12	20.8404
94282	Sfxn5	sideroflexin 5	1.76661	3.08365	14.2189	1.55393e-13	3.52393e-12	21.0045
170716	Cyp4f13	cytochrome P450, family 4, subfamily f, polypeptide 13	2.32793	3.12498	14.2182	1.55563e-13	3.52393e-12	21.0382
233870	Tufm	Tu translation elongation factor, mitochondrial	-1.16382	6.02953	-14.2135	1.56713e-13	3.54509e-12	20.8118
53626	Insm1	insulinoma-associated 1	-4.07281	1.49565	-14.2359	1.57847e-13	3.5651e-12	20.8503
20583	Snai2	snail family zinc finger 2	-3.38935	2.18532	-14.238	1.58033e-13	3.5651e-12	20.9899
381318	Nsl1	NSL1, MIS12 kinetochore complex component	-1.67121	4.21175	-14.1966	1.60968e-13	3.62632e-12	20.9517
24056	Sh3bp5	SH3-domain binding protein 5 (BTK-associated)	-1.28927	5.47576	-14.193	1.6189e-13	3.64208e-12	20.8243
226419	Dyrk3	dual-specificity tyrosine-(Y)-phosphorylation regulated kinase 3	-2.26238	5.00974	-14.2179	1.64807e-13	3.70262e-12	20.878
22235	Ugdh	UDP-glucose dehydrogenase	-1.35479	8.66826	-14.1773	1.66198e-13	3.72875e-12	20.71
100041948	Gm9800	predicted gene 9800	-1.34424	5.18305	-14.17	1.67897e-13	3.76173e-12	20.7889
66259	Camk2n1	calcium/calmodulin-dependent protein kinase II inhibitor 1	2.47394	4.76691	14.1995	1.69653e-13	3.79587e-12	20.8543
15278	Tfb2m	transcription factor B2, mitochondrial	-1.32971	4.63016	-14.1595	1.70719e-13	3.81451e-12	20.8457
74120	Zfp263	zinc finger protein 263	1.4179	5.1476	14.1456	1.7453e-13	3.89435e-12	20.7504
76889	Coq8b	coenzyme Q8B	1.60935	3.26858	14.1407	1.75902e-13	3.91963e-12	20.9127
22146	Tuba1c	tubulin, alpha 1C	-1.30332	5.68979	-14.1397	1.76172e-13	3.9203e-12	20.7569
69605	Lnpk	lunapark, ER junction formation factor	-1.01529	5.90914	-14.1331	1.78022e-13	3.95611e-12	20.6939
75415	Arhgap12	Rho GTPase activating protein 12	1.16366	5.77717	14.1293	1.79092e-13	3.97449e-12	20.717
50772	Mapk6	mitogen-activated protein kinase 6	-1.37543	8.11381	-14.1311	1.8057e-13	4.00187e-12	20.6295
18605	Enpp1	ectonucleotide pyrophosphatase/phosphodiesterase 1	1.48508	3.62154	14.1212	1.81438e-13	4.01172e-12	20.7738
224674	Slc37a1	solute carrier family 37 (glycerol-3-phosphate transporter), member 1	4.10884	2.64519	14.1316	1.81505e-13	4.01172e-12	20.6251
210719	Mkx	mohawk homeobox	-4.08606	0.639234	-14.1133	1.83711e-13	4.05501e-12	20.5172
331623	Bend3	BEN domain containing 3	-1.76879	5.18181	-14.1381	1.84458e-13	4.06602e-12	20.72
28035	Usp39	ubiquitin specific peptidase 39	-0.960278	6.32665	-14.1023	1.86969e-13	4.11582e-12	20.6356
105522	Ankrd28	ankyrin repeat domain 28	-1.79843	6.89045	-14.137	1.87286e-13	4.11727e-12	20.6234
71983	Tmco6	transmembrane and coiled-coil domains 6	1.87729	3.06069	14.0816	1.93221e-13	4.24205e-12	20.8175
14062	F2r	coagulation factor II (thrombin) receptor	-1.69894	8.37233	-14.0958	1.99922e-13	4.38331e-12	20.5269
212285	Arap2	ArfGAP with RhoGAP domain, ankyrin repeat and PH domain 2	2.54573	5.44622	14.0868	2.028e-13	4.44044e-12	20.6938
57349	Ppbp	pro-platelet basic protein	3.89648	4.50479	14.0847	2.0349e-13	4.44826e-12	20.7457
75705	Eif4b	eukaryotic translation initiation factor 4B	-0.857097	9.77673	-14.0485	2.037e-13	4.44826e-12	20.5007
77622	Apex2	apurinic/apyrimidinic endonuclease 2	-1.54174	4.37813	-14.0381	2.07133e-13	4.5172e-12	20.6504
66356	Knop1	lysine rich nucleolar protein 1	-0.974714	6.39514	-14.0309	2.09512e-13	4.56301e-12	20.5074
15511	Hspa1b	heat shock protein 1B	2.592	5.88176	14.0591	2.11943e-13	4.60982e-12	20.5853
12176	Bnip3	BCL2/adenovirus E1B interacting protein 3	2.99898	4.84166	14.0548	2.13367e-13	4.63465e-12	20.5737
19656	Rbmxl1	RNA binding motif protein, X-linked like-1	-1.53648	5.77834	-14.0277	2.15324e-13	4.67097e-12	20.5067
13204	Dhx15	DEAH (Asp-Glu-Ala-His) box polypeptide 15	-0.852977	8.69874	-14.0083	2.1721e-13	4.70565e-12	20.4365
69834	Rab43	RAB43, member RAS oncogene family	1.83348	5.70086	14.0379	2.19197e-13	4.74241e-12	20.5428
209586	Nudcd3	NudC domain containing 3	-1.14419	6.26607	-13.9978	2.20906e-13	4.77309e-12	20.4636
108946	Zzz3	zinc finger, ZZ domain containing 3	-1.06405	7.27708	-13.9965	2.21356e-13	4.7765e-12	20.4331
78388	Mvp	major vault protein	1.41278	6.38033	13.9919	2.23018e-13	4.80604e-12	20.4551
66102	Cxcl16	chemokine (C-X-C motif) ligand 16	2.3231	6.76904	14.0259	2.2344e-13	4.80881e-12	20.4593
72722	Fam98a	family with sequence similarity 98, member A	-1.02694	6.55325	-13.9795	2.2747e-13	4.8891e-12	20.4279
237877	Atad5	ATPase family, AAA domain containing 5	-1.89913	5.13334	-14.0116	2.28586e-13	4.90037e-12	20.5135
74513	Neto2	neuropilin (NRP) and tolloid (TLL)-like 2	-5.46401	2.73732	-14.0116	2.28592e-13	4.90037e-12	20.6561
12799	Cnp	2',3'-cyclic nucleotide 3' phosphodiesterase	1.78619	4.74928	13.9753	2.29263e-13	4.90833e-12	20.5599
68278	Ddx39a	DEAD box helicase 39a	-1.51017	7.74209	-13.9946	2.32503e-13	4.96757e-12	20.3801
28036	Larp7	La ribonucleoprotein domain family, member 7	-1.06044	6.22063	-13.9655	2.32637e-13	4.96757e-12	20.4032
107566	Arl2bp	ADP-ribosylation factor-like 2 binding protein	-1.28462	6.65176	-13.9602	2.34641e-13	5.00384e-12	20.3904
321022	Cdv3	carnitine deficiency-associated gene expressed in ventricle 3	-0.831378	8.245	-13.9512	2.38048e-13	5.06989e-12	20.3457
232533	Stk38l	serine/threonine kinase 38 like	1.25266	4.94428	13.9428	2.41256e-13	5.13155e-12	20.4496
69612	Kansl2	KAT8 regulatory NSL complex subunit 2	-1.01685	6.49522	-13.9372	2.43462e-13	5.17175e-12	20.3644
108888	Atad3a	ATPase family, AAA domain containing 3A	-1.18565	6.03594	-13.9361	2.43891e-13	5.17414e-12	20.3747
29811	Ndrg2	N-myc downstream regulated gene 2	-2.5211	1.87672	-13.932	2.4612e-13	5.21469e-12	20.5839
71978	Ppp2r2a	protein phosphatase 2, regulatory subunit B, alpha	-0.948398	7.08467	-13.9208	2.49942e-13	5.28882e-12	20.313
229731	Slc25a24	solute carrier family 25 (mitochondrial carrier, phosphate carrier), member 24	-0.974838	8.3677	-13.9175	2.51285e-13	5.31038e-12	20.2903
237107	Gnl3l	guanine nucleotide binding protein-like 3 (nucleolar)-like	-1.21187	6.3542	-13.9136	2.52875e-13	5.3371e-12	20.3285
17160	Man2b2	mannosidase 2, alpha B2	2.30574	4.79385	13.9472	2.53369e-13	5.34064e-12	20.4498
15901	Id1	inhibitor of DNA binding 1, HLH protein	-2.39624	7.0904	-13.9458	2.53908e-13	5.34512e-12	20.3021
14057	Sfxn1	sideroflexin 1	-0.930711	6.61121	-13.9028	2.573e-13	5.40957e-12	20.2939
241274	Pnpla7	patatin-like phospholipase domain containing 7	2.4392	4.34367	13.9272	2.61588e-13	5.49268e-12	20.4649
209086	Samd9l	sterile alpha motif domain containing 9-like	2.55889	3.27994	13.9229	2.63425e-13	5.52418e-12	20.4645
14168	Fgf13	fibroblast growth factor 13	-4.07524	1.81334	-13.9005	2.73035e-13	5.71836e-12	20.3945
12545	Cdc7	cell division cycle 7 (S. cerevisiae)	-1.04792	4.66788	-13.864	2.73907e-13	5.7293e-12	20.3296
71949	Cers5	ceramide synthase 5	-0.993075	7.07988	-13.8597	2.75787e-13	5.75394e-12	20.2063
67096	Mmachc	methylmalonic aciduria cblC type, with homocystinuria	-1.45931	4.01475	-13.8597	2.75787e-13	5.75394e-12	20.4001
67623	Tm7sf3	transmembrane 7 superfamily member 3	1.37174	4.32508	13.8579	2.76597e-13	5.76349e-12	20.3671
15361	Hmga1	high mobility group AT-hook 1	-1.93917	8.50178	-13.8908	2.77329e-13	5.7714e-12	20.1942
12530	Cdc25a	cell division cycle 25A	-1.42568	5.65216	-13.8466	2.81707e-13	5.85507e-12	20.2644
229211	Acad9	acyl-Coenzyme A dehydrogenase family, member 9	-1.03423	5.7112	-13.827	2.90766e-13	6.0357e-12	20.2005
100861774	NA	NA	-2.52808	6.73351	-13.8534	2.94526e-13	6.106e-12	20.1674
68215	Fam98b	family with sequence similarity 98, member B	-0.886647	6.35463	-13.8113	2.98215e-13	6.17468e-12	20.158
13495	Drg2	developmentally regulated GTP binding protein 2	-1.17216	6.43516	-13.8066	3.00507e-13	6.21428e-12	20.1451
22214	Ube2h	ubiquitin-conjugating enzyme E2H	1.45498	5.90465	13.8001	3.03772e-13	6.27386e-12	20.1665
12151	Bmi1	Bmi1 polycomb ring finger oncogene	-1.19906	6.18127	-13.7972	3.05116e-13	6.29369e-12	20.1247
68048	Aen	apoptosis enhancing nuclease	-1.4683	5.02555	-13.7892	3.09111e-13	6.35974e-12	20.2018
272551	Gins2	GINS complex subunit 2 (Psf2 homolog)	-2.06876	5.55308	-13.8231	3.09253e-13	6.35974e-12	20.1828
26569	Slc27a4	solute carrier family 27 (fatty acid transporter), member 4	1.3303	5.87343	13.7884	3.09483e-13	6.35974e-12	20.1428
269181	Mgat4a	mannoside acetylglucosaminyltransferase 4, isoenzyme A	2.64453	5.06241	13.8159	3.12874e-13	6.42138e-12	20.213
574428	Zmynd15	zinc finger, MYND-type containing 15	4.29724	2.35781	13.8144	3.13631e-13	6.42884e-12	20.2427
76131	Depdc1a	DEP domain containing 1a	-2.74535	4.39843	-13.8135	3.14062e-13	6.42964e-12	20.2391
279653	Pcdh19	protocadherin 19	-3.83984	2.49895	-13.7989	3.21548e-13	6.57468e-12	20.2919
11981	Atp9a	ATPase, class II, type 9A	5.32601	5.33468	13.7904	3.25992e-13	6.65723e-12	20.2877
74326	Hnrnpr	heterogeneous nuclear ribonucleoprotein R	-0.913449	6.94692	-13.7555	3.26455e-13	6.65838e-12	20.0387
75939	4930579G24Rik	RIKEN cDNA 4930579G24 gene	-1.6382	3.54334	-13.7454	3.31841e-13	6.75981e-12	20.2431
101994	Champ1	chromosome alignment maintaining phosphoprotein 1	-1.18543	5.61079	-13.7424	3.3348e-13	6.78477e-12	20.0942
93762	Smarca5	SWI/SNF related, matrix associated, actin dependent regulator of chromatin, subfamily a, member 5	-0.892681	8.37373	-13.7363	3.36806e-13	6.84393e-12	19.9896
14464	Gata5	GATA binding protein 5	-8.75397	-2.41449	-13.7658	3.39241e-13	6.88487e-12	18.5765
64209	Herpud1	homocysteine-inducible, endoplasmic reticulum stress-inducible, ubiquitin-like domain member 1	1.62864	6.19839	13.7413	3.4351e-13	6.96289e-12	20.0692
209737	Kif15	kinesin family member 15	-1.66839	5.08514	-13.7271	3.51486e-13	7.11574e-12	20.0611
66902	Mtap	methylthioadenosine phosphorylase	-1.23196	7.18688	-13.7029	3.55584e-13	7.18981e-12	19.9441
80886	Senp3	SUMO/sentrin specific peptidase 3	-0.800391	6.99354	-13.7011	3.56661e-13	7.19503e-12	19.9491
76561	Snx7	sorting nexin 7	-2.49256	4.06344	-13.7347	3.5672e-13	7.19503e-12	20.1151
71974	Prmt3	protein arginine N-methyltransferase 3	-1.07493	5.48368	-13.6962	3.5948e-13	7.24178e-12	20.0119
666634	Gm8203	H2A histone family, member Z pseudogene	-2.26519	5.08447	-13.7277	3.60787e-13	7.25917e-12	20.0421
20382	Srsf2	serine and arginine-rich splicing factor 2	-1.26691	8.73335	-13.6922	3.61849e-13	7.27162e-12	19.9143
66497	Cmss1	cms small ribosomal subunit 1	-2.201	3.98254	-13.7161	3.67636e-13	7.37886e-12	20.1119
67383	Carnmt1	carnosine N-methyltransferase 1	-1.43122	4.2849	-13.6758	3.7162e-13	7.44968e-12	20.0352
72567	Bclaf1	BCL2-associated transcription factor 1	-1.26447	7.81649	-13.6738	3.72862e-13	7.46545e-12	19.8906
74919	Slc35f6	solute carrier family 35, member F6	1.26072	5.5739	13.6716	3.74204e-13	7.48317e-12	19.9888
11610	Agtrap	angiotensin II, type I receptor-associated protein	2.03146	4.43389	13.702	3.76147e-13	7.51285e-12	20.0574
213068	Tmem71	transmembrane protein 71	2.73418	2.46153	13.6586	3.82249e-13	7.62543e-12	20.0795
66848	Fuca2	fucosidase, alpha-L- 2, plasma	3.57361	4.0944	13.6908	3.83044e-13	7.63199e-12	20.1186
68556	Uckl1	uridine-cytidine kinase 1-like 1	1.47638	4.67274	13.647	3.89501e-13	7.74183e-12	20.0069
17347	Mknk2	MAP kinase-interacting serine/threonine kinase 2	1.3292	6.63038	13.647	3.89502e-13	7.74183e-12	19.875
69908	Rab3b	RAB3B, member RAS oncogene family	-4.39797	0.83581	-13.6573	3.95474e-13	7.85101e-12	19.8319
73945	Otud4	OTU domain containing 4	-1.78749	9.15992	-13.6688	3.97038e-13	7.8725e-12	19.8238
13601	Ecm1	extracellular matrix protein 1	1.61411	7.25316	13.6663	3.98651e-13	7.89494e-12	19.8307
223921	Aaas	achalasia, adrenocortical insufficiency, alacrimia	-1.18822	5.91545	-13.6304	4.00233e-13	7.91669e-12	19.8745
218581	Depdc1b	DEP domain containing 1B	-2.11358	3.38168	-13.6296	4.00777e-13	7.91789e-12	20.0871
18515	Pbx2	pre B cell leukemia homeobox 2	1.09579	5.35571	13.6261	4.03031e-13	7.95283e-12	19.8887
209588	Sectm1a	secreted and transmembrane 1A	7.37579	-4.72213	13.622	4.05785e-13	7.99753e-12	16.696
56449	Ybx3	Y box protein 3	-1.4172	8.68379	-13.6395	4.07187e-13	8.01552e-12	19.7976
18585	Pde9a	phosphodiesterase 9A	2.30926	3.17681	13.6178	4.08567e-13	8.03303e-12	20.0817
18011	Neurl1a	neuralized E3 ubiquitin protein ligase 1A	3.58161	2.89434	13.609	4.14459e-13	8.1391e-12	19.9166
11820	App	amyloid beta (A4) precursor protein	1.53183	8.60811	13.6376	4.17679e-13	8.18609e-12	19.7734
235293	Sc5d	sterol-C5-desaturase	-1.07177	6.14815	-13.6041	4.17852e-13	8.18609e-12	19.8109
70693	Adgra3	adhesion G protein-coupled receptor A3	-1.97011	5.00462	-13.6338	4.20263e-13	8.22349e-12	19.8776
18508	Pax6	paired box 6	-4.34269	-1.68508	-13.5975	4.22396e-13	8.25537e-12	18.8122
104416	Bap1	Brca1 associated protein 1	-0.910241	6.1834	-13.5853	4.30911e-13	8.41175e-12	19.78
212679	Mars2	methionine-tRNA synthetase 2 (mitochondrial)	-1.86953	3.73095	-13.578	4.36088e-13	8.50269e-12	19.9708
72201	Otud6b	OTU domain containing 6B	-1.30131	6.68944	-13.5759	4.37567e-13	8.52137e-12	19.7585
19348	Kif20a	kinesin family member 20A	-1.41199	6.99124	-13.5845	4.3966e-13	8.55179e-12	19.7489
319262	Fchsd1	FCH and double SH3 domains 1	2.66912	3.47108	13.589	4.40173e-13	8.55179e-12	20.0095
67037	Pmf1	polyamine-modulated factor 1	-1.53643	5.56868	-13.5777	4.45688e-13	8.64868e-12	19.7864
16971	Lrp1	low density lipoprotein receptor-related protein 1	3.40491	6.05735	13.5949	4.4778e-13	8.67898e-12	19.7597
51810	Hnrnpu	heterogeneous nuclear ribonucleoprotein U	-0.835498	9.83415	-13.5588	4.50064e-13	8.71295e-12	19.6906
100336	Ppp1r8	protein phosphatase 1, regulatory subunit 8	-1.25784	6.32542	-13.5568	4.51538e-13	8.73115e-12	19.7409
26360	Angptl2	angiopoietin-like 2	-1.73374	6.41288	-13.5806	4.5836e-13	8.85262e-12	19.7179
230514	Leprot	leptin receptor overlapping transcript	1.45806	6.53091	13.5553	4.65196e-13	8.97407e-12	19.6965
234076	Tmco3	transmembrane and coiled-coil domains 3	1.23591	4.68352	13.5349	4.68073e-13	9.01894e-12	19.8177
18968	Pola1	polymerase (DNA directed), alpha 1	-1.43921	6.22347	-13.5384	4.74232e-13	9.1229e-12	19.6854
67738	Ppid	peptidylprolyl isomerase D (cyclophilin D)	-1.65713	7.69965	-13.5594	4.74583e-13	9.1229e-12	19.6505
67781	Ilf2	interleukin enhancer binding factor 2	-1.31539	7.22517	-13.5259	4.75369e-13	9.1273e-12	19.6522
13032	Ctsc	cathepsin C	3.52778	6.26236	13.5528	4.79715e-13	9.19707e-12	19.6584
17427	Mns1	meiosis-specific nuclear structural protein 1	-1.78659	3.20407	-13.5194	4.80125e-13	9.19707e-12	19.9
170799	Rtkn2	rhotekin 2	-2.32086	1.975	-13.5185	4.80851e-13	9.2002e-12	19.9026
69270	Gins1	GINS complex subunit 1 (Psf1 homolog)	-2.05507	5.00766	-13.5484	4.83152e-13	9.23344e-12	19.7468
338523	Kdm7a	lysine (K)-specific demethylase 7A	6.09372	4.06876	13.5456	4.85428e-13	9.26612e-12	19.8672
12532	Cdc25c	cell division cycle 25C	-1.47695	4.34416	-13.5102	4.87457e-13	9.29403e-12	19.8058
56847	Aldh1a3	aldehyde dehydrogenase family 1, subfamily A3	-2.80132	3.01443	-13.5359	4.93157e-13	9.39177e-12	19.8349
12825	Col3a1	collagen, type III, alpha 1	4.25296	1.74406	13.5337	4.94968e-13	9.41531e-12	19.6692
12235	Bub1	BUB1, mitotic checkpoint serine/threonine kinase	-1.57855	7.0022	-13.5241	5.02819e-13	9.55355e-12	19.6135
234374	Ddx49	DEAD box helicase 49	-1.0808	5.27805	-13.4889	5.04849e-13	9.58102e-12	19.6804
232345	A2m	alpha-2-macroglobulin	8.21468	-4.94058	13.469	5.21659e-13	9.88858e-12	15.6605
72947	Phykpl	5-phosphohydroxy-L-lysine phospholyase	-1.30973	3.83657	-13.4668	5.23567e-13	9.91328e-12	19.773
20847	Stat2	signal transducer and activator of transcription 2	3.87753	3.21821	13.4986	5.24264e-13	9.915e-12	19.8363
54725	Cadm1	cell adhesion molecule 1	-1.77457	6.89344	-13.4945	5.27819e-13	9.97072e-12	19.5626
216440	Os9	amplified in osteosarcoma	1.34477	6.06497	13.4499	5.38375e-13	1.01584e-11	19.5525
18120	Mrpl49	mitochondrial ribosomal protein L49	-1.56463	5.92651	-13.4724	5.41819e-13	1.02063e-11	19.5684
12371	Casp9	caspase 9	1.47317	4.27024	13.4457	5.42161e-13	1.02063e-11	19.723
57869	Adck2	aarF domain containing kinase 2	1.69839	2.67264	13.4441	5.43564e-13	1.0221e-11	19.7985
217328	Myo15b	myosin XVB	-5.09422	1.46832	-13.4692	5.5025e-13	1.03332e-11	19.7102
28015	Polr2m	polymerase (RNA) II (DNA directed) polypeptide M	-0.942284	7.60638	-13.4361	5.50791e-13	1.03332e-11	19.4941
58186	Rad18	RAD18 E3 ubiquitin protein ligase	-1.52404	4.7759	-13.4306	5.55855e-13	1.04162e-11	19.6533
26401	Map3k1	mitogen-activated protein kinase kinase kinase 1	1.86763	4.91638	13.4589	5.59652e-13	1.04754e-11	19.5989
12974	Cs	citrate synthase	-1.05255	8.48596	-13.4248	5.61151e-13	1.04915e-11	19.4683
99480	Dnttip2	deoxynucleotidyltransferase, terminal, interacting protein 2	-1.48755	7.2048	-13.4455	5.67643e-13	1.05907e-11	19.481
70701	Nipal1	NIPA-like domain containing 1	-2.45519	5.41254	-13.4502	5.67751e-13	1.05907e-11	19.6235
13030	Ctsb	cathepsin B	2.23784	9.03024	13.4382	5.79022e-13	1.07887e-11	19.439
208518	Cep78	centrosomal protein 78	-1.25719	3.42674	-13.4045	5.80398e-13	1.0802e-11	19.6771
76936	Hnrnpm	heterogeneous nuclear ribonucleoprotein M	-0.924203	8.69334	-13.3917	5.9282e-13	1.10207e-11	19.4091
105352	Dusp22	dual specificity phosphatase 22	4.05233	2.09173	13.4082	6.08404e-13	1.12976e-11	19.6072
56075	Pdss1	prenyl (solanesyl) diphosphate synthase, subunit 1	-1.70043	4.55496	-13.377	6.10983e-13	1.13206e-11	19.5601
71041	Pcgf6	polycomb group ring finger 6	-1.64813	5.0319	-13.3923	6.1103e-13	1.13206e-11	19.4983
76044	Ncapg2	non-SMC condensin II complex, subunit G2	-1.64835	6.51817	-13.3942	6.22622e-13	1.15095e-11	19.398
19156	Psap	prosaposin	2.57432	9.29011	13.394	6.22879e-13	1.15095e-11	19.3652
56086	Set	SET nuclear oncogene	-1.20792	9.51864	-13.3614	6.23333e-13	1.15095e-11	19.3573
69072	Ebna1bp2	EBNA1 binding protein 2	-1.54	6.72354	-13.3876	6.29487e-13	1.16101e-11	19.3823
19125	Prodh	proline dehydrogenase	-2.26138	2.30452	-13.3532	6.32436e-13	1.16496e-11	19.6386
217653	Mis18bp1	MIS18 binding protein 1	-1.81568	4.69343	-13.3783	6.33051e-13	1.16496e-11	19.5078
14055	Ezh1	enhancer of zeste 1 polycomb repressive complex 2 subunit	1.59596	4.64937	13.3443	6.41287e-13	1.17879e-11	19.5251
74203	Eif4enif1	eukaryotic translation initiation factor 4E nuclear import factor 1	-0.876885	6.6759	-13.3419	6.43887e-13	1.18224e-11	19.3535
72477	Tmem87b	transmembrane protein 87B	1.08433	6.02592	13.34	6.45835e-13	1.18449e-11	19.3972
230233	Elp1	elongator complex protein 1	-1.01523	6.73324	-13.3363	6.49869e-13	1.19055e-11	19.3492
108671	Dnajc9	DnaJ heat shock protein family (Hsp40) member C9	-1.73622	5.28947	-13.3631	6.55437e-13	1.19941e-11	19.3975
108660	Rnf187	ring finger protein 187	-1.17741	7.10631	-13.3189	6.6894e-13	1.22276e-11	19.3036
227612	Tor4a	torsin family 4, member A	0.853718	6.1302	13.3143	6.74033e-13	1.23069e-11	19.3351
13350	Dgat1	diacylglycerol O-acyltransferase 1	2.0774	5.38537	13.343	6.77646e-13	1.23591e-11	19.3791
69953	2810025M15Rik	RIKEN cDNA 2810025M15 gene	-1.39258	3.88665	-13.3085	6.80647e-13	1.24e-11	19.4335
70686	Dusp16	dual specificity phosphatase 16	1.64529	5.36396	13.3097	6.86322e-13	1.24869e-11	19.4237
231668	Vsig10	V-set and immunoglobulin domain containing 10	2.40839	5.21973	13.3348	6.86938e-13	1.24869e-11	19.4536
100043123	Cd300ld4	CD300 molecule like family member D4	6.54391	-5.35296	13.294	6.97243e-13	1.26507e-11	15.3292
16633	Klra2	killer cell lectin-like receptor, subfamily A, member 2	5.64777	1.97714	13.3256	6.97493e-13	1.26507e-11	19.377
104458	Rars	arginyl-tRNA synthetase	-1.30878	8.36477	-13.2927	7.0785e-13	1.28243e-11	19.2355
268417	Zkscan17	zinc finger with KRAB and SCAN domains 17	-1.33612	5.92066	-13.2836	7.09497e-13	1.28399e-11	19.2958
234214	Sorbs2	sorbin and SH3 domain containing 2	-1.84925	6.0956	-13.3113	7.1423e-13	1.29113e-11	19.2851
21938	Tnfrsf1b	tumor necrosis factor receptor superfamily, member 1b	2.45712	5.11445	13.3068	7.19605e-13	1.29942e-11	19.3164
14238	Foxf2	forkhead box F2	-2.59144	4.10963	-13.3047	7.22124e-13	1.30253e-11	19.4392
72512	Sting1	stimulator of interferon response cGAMP interactor 1	2.90021	4.71111	13.3015	7.25945e-13	1.30798e-11	19.4127
73139	Cenpv	centromere protein V	-2.06315	3.35816	-13.298	7.29446e-13	1.31284e-11	19.4202
216198	Tcp11l2	t-complex 11 (mouse) like 2	4.28819	2.43137	13.2958	7.32786e-13	1.31723e-11	19.3402
76582	Ipo11	importin 11	-1.34093	5.90768	-13.2636	7.33493e-13	1.31723e-11	19.2638
219072	Haus4	HAUS augmin-like complex, subunit 4	-1.66942	4.58973	-13.2556	7.44445e-13	1.33544e-11	19.3579
20204	Prrx2	paired related homeobox 2	-3.31958	1.21898	-13.2779	7.5495e-13	1.3528e-11	19.4601
320145	Sp8	trans-acting transcription factor 8	-6.49331	0.411421	-13.2746	7.59167e-13	1.35887e-11	18.5223
14585	Gfra1	glial cell line derived neurotrophic factor family receptor alpha 1	-4.23093	1.63875	-13.272	7.62355e-13	1.36308e-11	19.4096
20846	Stat1	signal transducer and activator of transcription 1	4.18265	4.23372	13.2696	7.65404e-13	1.36704e-11	19.3888
24055	Sh3bp2	SH3-domain binding protein 2	2.14785	5.60247	13.2686	7.66726e-13	1.36791e-11	19.2624
20775	Sqle	squalene epoxidase	-1.14198	7.76902	-13.2325	7.72609e-13	1.37691e-11	19.147
215113	Slc43a2	solute carrier family 43, member 2	3.522	4.15103	13.2558	7.83296e-13	1.39444e-11	19.3701
12159	Bmp4	bone morphogenetic protein 4	-3.11595	0.800653	-13.2157	7.94698e-13	1.4132e-11	19.3005
13805	Eng	endoglin	3.38367	2.5865	13.2437	7.99202e-13	1.41967e-11	19.4161
234463	Tmem184c	transmembrane protein 184C	-1.37175	5.76794	-13.2086	8.04127e-13	1.42687e-11	19.1786
67861	Akr1b10	aldo-keto reductase family 1, member B10 (aldose reductase)	1.93903	3.52112	13.2047	8.09403e-13	1.43341e-11	19.37
223723	Ttll12	tubulin tyrosine ligase-like family, member 12	-1.34165	6.94955	-13.2133	8.09567e-13	1.43341e-11	19.1168
19826	Rnps1	RNA binding protein with serine rich domain 1	-1.2252	6.78227	-13.202	8.13049e-13	1.43803e-11	19.118
16907	Lmnb2	lamin B2	-1.34875	5.29953	-13.2	8.15805e-13	1.44134e-11	19.1833
14048	Eya1	EYA transcriptional coactivator and phosphatase 1	-6.28893	-0.0167651	-13.2249	8.24552e-13	1.45523e-11	18.6885
13139	Dgka	diacylglycerol kinase, alpha	2.01639	2.58784	13.1903	8.29142e-13	1.46175e-11	19.3539
223920	Soat2	sterol O-acyltransferase 2	2.72845	2.48336	13.1885	8.31731e-13	1.46474e-11	19.2382
15932	Idua	iduronidase, alpha-L	2.60218	3.34916	13.2149	8.38504e-13	1.47508e-11	19.3615
16190	Il4ra	interleukin 4 receptor, alpha	2.02171	6.73834	13.2137	8.40204e-13	1.47649e-11	19.0782
66090	Ypel3	yippee like 3	3.77726	3.22364	13.2109	8.44105e-13	1.48175e-11	19.3525
69900	Mfsd11	major facilitator superfamily domain containing 11	1.0813	5.01839	13.1716	8.5565e-13	1.50041e-11	19.1667
18799	Plcd1	phospholipase C, delta 1	2.20322	4.17852	13.181	8.59646e-13	1.50581e-11	19.3148
56421	Pfkp	phosphofructokinase, platelet	2.35049	5.42608	13.186	8.79996e-13	1.53981e-11	19.1158
23959	Nt5e	5' nucleotidase, ecto	4.11852	5.43815	13.1759	8.94897e-13	1.56421e-11	19.2166
20715	Serpina3g	serine (or cysteine) peptidase inhibitor, clade A, member 3G	10.4868	-3.65781	13.1636	9.00911e-13	1.57304e-11	15.5742
80285	Parp9	poly (ADP-ribose) polymerase family, member 9	2.41768	3.37011	13.1708	9.02543e-13	1.57421e-11	19.2285
67731	Fbxo32	F-box protein 32	2.88212	4.79158	13.1651	9.11295e-13	1.58779e-11	19.2301
18791	Plat	plasminogen activator, tissue	2.85096	6.78973	13.1622	9.15747e-13	1.59385e-11	19.0506
432731	Zscan26	zinc finger and SCAN domain containing 26	1.53121	4.82856	13.1223	9.29477e-13	1.61603e-11	19.1164
21813	Tgfbr2	transforming growth factor, beta receptor II	1.43274	7.09055	13.1411	9.32439e-13	1.61891e-11	18.9822
56351	Ptges3	prostaglandin E synthase 3	-1.20321	6.67865	-13.12	9.33115e-13	1.61891e-11	18.9789
68404	Nrn1	neuritin 1	-5.58931	2.75598	-13.1493	9.35612e-13	1.62153e-11	19.258
20218	Khdrbs1	KH domain containing, RNA binding, signal transduction associated 1	-0.752276	8.01163	-13.1168	9.38194e-13	1.62429e-11	18.9444
545812	Pilrb2	paired immunoglobin-like type 2 receptor beta 2	3.35942	2.13287	13.1462	9.40579e-13	1.6267e-11	19.2595
106504	Stk38	serine/threonine kinase 38	0.979385	6.53787	13.1131	9.4397e-13	1.63003e-11	18.9687
106014	Tafa5	TAFA chemokine like family member 5	-6.29302	1.24027	-13.1437	9.44496e-13	1.63003e-11	18.7961
70807	Arrdc2	arrestin domain containing 2	2.51989	2.41014	13.1078	9.52407e-13	1.64195e-11	19.2376
57738	Slc15a2	solute carrier family 15 (H+/peptide transporter), member 2	3.61755	1.35627	13.1122	9.5641e-13	1.64712e-11	19.1048
59001	Pole3	polymerase (DNA directed), epsilon 3 (p17 subunit)	-1.11237	4.87441	-13.1038	9.58932e-13	1.64973e-11	19.0502
27362	Dnajb9	DnaJ heat shock protein family (Hsp40) member B9	1.44653	4.91733	13.0912	9.79515e-13	1.68337e-11	19.0269
21923	Tnc	tenascin C	4.08878	2.68606	13.1192	9.84025e-13	1.68935e-11	19.0953
67337	Cstf1	cleavage stimulation factor, 3' pre-RNA, subunit 1	-1.11755	6.06309	-13.085	9.8977e-13	1.69743e-11	18.9558
229534	Pbxip1	pre B cell leukemia transcription factor interacting protein 1	2.24408	5.14806	13.1151	9.90823e-13	1.69746e-11	19.0746
107368	Pdzd8	PDZ domain containing 8	-1.14316	6.97949	-13.0823	9.94261e-13	1.70157e-11	18.9018
72151	Rfc5	replication factor C (activator 1) 5	-1.22554	5.93337	-13.0767	1.00375e-12	1.71602e-11	18.9329
103733	Tubg1	tubulin, gamma 1	-1.44792	6.01249	-13.0871	1.00659e-12	1.71908e-11	18.9374
20768	Sephs2	selenophosphate synthetase 2	-1.29961	5.66173	-13.073	1.01005e-12	1.72319e-11	18.956
100503802	Gm10419	predicted gene 10419	3.93342	0.346959	13.07	1.01506e-12	1.72993e-11	18.5716
12404	Cbln1	cerebellin 1 precursor protein	-2.53994	0.89685	-13.0709	1.02385e-12	1.7431e-11	19.1736
224742	Abcf1	ATP-binding cassette, sub-family F (GCN20), member 1	-0.97382	7.84395	-13.049	1.0518e-12	1.78882e-11	18.8295
76479	Smndc1	survival motor neuron domain containing 1	-1.20501	6.88766	-13.0471	1.05516e-12	1.79268e-11	18.8442
75416	Nop14	NOP14 nucleolar protein	-1.30146	7.31522	-13.0459	1.06002e-12	1.79772e-11	18.8447
26464	Vnn3	vanin 3	8.47249	-4.62835	13.0442	1.06032e-12	1.79772e-11	15.2438
50493	Txnrd1	thioredoxin reductase 1	-1.12471	8.87944	-13.0395	1.06884e-12	1.81029e-11	18.809
18971	Pold1	polymerase (DNA directed), delta 1, catalytic subunit	-1.44372	5.76221	-13.0522	1.07379e-12	1.81679e-11	18.8602
75062	Sf3a3	splicing factor 3a, subunit 3	-0.9596	6.64914	-13.0349	1.07718e-12	1.82064e-11	18.832
100087	Kti12	KTI12 homolog, chromatin associated	-1.5098	5.18674	-13.0413	1.07901e-12	1.82185e-11	18.9186
228421	Kif18a	kinesin family member 18A	-2.10937	4.99896	-13.0478	1.10962e-12	1.87161e-11	18.9216
242960	Fbxl5	F-box and leucine-rich repeat protein 5	1.45783	6.68003	13.0306	1.13459e-12	1.91176e-11	18.777
243371	Lrrc61	leucine rich repeat containing 61	2.6465	1.85895	12.9973	1.14789e-12	1.93219e-11	18.9075
217031	Tada2a	transcriptional adaptor 2A	-1.20146	4.91451	-12.9956	1.1513e-12	1.93594e-11	18.8616
67486	Polr3g	polymerase (RNA) III (DNA directed) polypeptide G	-1.58125	4.70096	-12.9976	1.16178e-12	1.95155e-11	18.8769
67788	Sfr1	SWI5 dependent recombination repair 1	-1.14918	7.85697	-12.9886	1.16486e-12	1.95472e-11	18.7238
53945	Slc40a1	solute carrier family 40 (iron-regulated transporter), member 1	2.7327	3.28214	13.0182	1.16633e-12	1.95519e-11	19.0332
224792	Adgrf5	adhesion G protein-coupled receptor F5	3.21999	3.74078	13.0145	1.17366e-12	1.96546e-11	19.0205
67832	Brix1	BRX1, biogenesis of ribosomes	-1.71762	7.05829	-13.0122	1.17823e-12	1.9711e-11	18.7348
109079	Sephs1	selenophosphate synthetase 1	-0.833222	6.74146	-12.9797	1.1826e-12	1.97639e-11	18.7345
107435	Hat1	histone aminotransferase 1	-1.77009	6.48704	-13.0067	1.18934e-12	1.98562e-11	18.7405
12443	Ccnd1	cyclin D1	-1.1721	9.16892	-12.9662	1.21005e-12	2.01675e-11	18.679
26939	Polr3e	polymerase (RNA) III (DNA directed) polypeptide E	-1.1552	5.27095	-12.966	1.21045e-12	2.01675e-11	18.7873
66368	Rtca	RNA 3'-terminal phosphate cyclase	-1.28505	5.84417	-12.9632	1.21631e-12	2.02446e-11	18.7478
20539	Slc7a5	solute carrier family 7 (cationic amino acid transporter, y+ system), member 5	-1.72589	8.11354	-12.9741	1.25663e-12	2.08945e-11	18.6636
100039795	Ildr2	immunoglobulin-like domain containing receptor 2	-4.7715	1.48221	-12.9706	1.26411e-12	2.09976e-11	18.956
20833	Ssrp1	structure specific recognition protein 1	-0.906312	8.9304	-12.9327	1.28088e-12	2.12348e-11	18.6216
104263	Kdm3a	lysine (K)-specific demethylase 3A	1.25273	6.23161	12.9327	1.28098e-12	2.12348e-11	18.6785
20307	Ccl8	chemokine (C-C motif) ligand 8	8.71979	-0.61923	12.959	1.28928e-12	2.13507e-11	18.4768
14936	Gys1	glycogen synthase 1, muscle	1.7079	6.15047	12.9532	1.30182e-12	2.15184e-11	18.6896
71591	Zfp251	zinc finger protein 251	-1.33608	4.26014	-12.9231	1.30203e-12	2.15184e-11	18.8064
244237	Tnfrsf26	tumor necrosis factor receptor superfamily, member 26	3.67257	2.5447	12.9502	1.30863e-12	2.16056e-11	18.9045
56690	Mlycd	malonyl-CoA decarboxylase	2.56557	2.45072	12.916	1.31799e-12	2.17382e-11	18.8943
231238	Sel1l3	sel-1 suppressor of lin-12-like 3 (C. elegans)	4.89479	5.12968	12.9435	1.32352e-12	2.17968e-11	18.9217
66940	Shisa5	shisa family member 5	1.67019	6.73331	12.9428	1.32518e-12	2.17968e-11	18.6314
19144	Klk6	kallikrein related-peptidase 6	7.04313	1.68585	12.9426	1.32554e-12	2.17968e-11	18.4895
231050	Galnt11	polypeptide N-acetylgalactosaminyltransferase 11	1.41495	3.82618	12.9083	1.33532e-12	2.19357e-11	18.8201
70885	Ints10	integrator complex subunit 10	-0.897353	5.7332	-12.9031	1.34717e-12	2.21081e-11	18.6304
22627	Ywhae	tyrosine 3-monooxygenase/tryptophan 5-monooxygenase activation protein, epsilon polypeptide	-0.927661	9.79078	-12.8961	1.36332e-12	2.23508e-11	18.5571
102115	Dohh	deoxyhypusine hydroxylase/monooxygenase	-1.59838	5.46581	-12.9174	1.37071e-12	2.24494e-11	18.6626
244745	Dpy19l1	dpy-19-like 1 (C. elegans)	-1.37159	6.41671	-12.9046	1.38435e-12	2.26379e-11	18.5646
18974	Pole2	polymerase (DNA directed), epsilon 2 (p59 subunit)	-1.78243	4.03037	-12.8972	1.38498e-12	2.26379e-11	18.76
192174	Rwdd4a	RWD domain containing 4A	-1.09818	5.97266	-12.8751	1.41305e-12	2.30737e-11	18.5888
213819	Casd1	CAS1 domain containing 1	3.30522	3.10107	12.8872	1.45631e-12	2.37564e-11	18.8214
67052	Ndc80	NDC80 kinetochore complex component	-1.45139	5.86568	-12.8653	1.46432e-12	2.38633e-11	18.5729
20821	Trim21	tripartite motif-containing 21	3.75306	1.54843	12.862	1.47055e-12	2.3941e-11	18.6671
108155	Ogt	O-linked N-acetylglucosamine (GlcNAc) transferase (UDP-N-acetylglucosamine:polypeptide-N-acetylglucosaminyl transferase)	1.2227	7.55878	12.8481	1.47967e-12	2.4044e-11	18.4853
69219	Ddah1	dimethylarginine dimethylaminohydrolase 1	-2.38396	5.19813	-12.8778	1.47981e-12	2.4044e-11	18.7085
66997	Psmd12	proteasome (prosome, macropain) 26S subunit, non-ATPase, 12	-1.39594	7.55817	-12.8708	1.48381e-12	2.40851e-11	18.486
80986	Ckap2	cytoskeleton associated protein 2	-1.48687	5.47327	-12.8563	1.49711e-12	2.42769e-11	18.5557
54375	Azin1	antizyme inhibitor 1	-1.26981	7.87522	-12.8459	1.50393e-12	2.43633e-11	18.4663
12237	Bub3	BUB3 mitotic checkpoint protein	-1.59924	6.71425	-12.8672	1.50655e-12	2.43817e-11	18.4906
26936	Mprip	myosin phosphatase Rho interacting protein	-1.47859	8.79749	-12.8471	1.55924e-12	2.52096e-11	18.4245
338359	Supv3l1	suppressor of var1, 3-like 1 (S. cerevisiae)	-1.01348	4.67267	-12.8083	1.58399e-12	2.55664e-11	18.5629
70998	Phf6	PHD finger protein 6	-1.22866	5.98297	-12.8082	1.58444e-12	2.55664e-11	18.4514
208624	Alg3	asparagine-linked glycosylation 3 (alpha-1,3-mannosyltransferase)	-1.29852	4.27824	-12.8062	1.58972e-12	2.56054e-11	18.5699
14282	Fosb	FBJ osteosarcoma oncogene B	3.06877	6.07441	12.8356	1.58998e-12	2.56054e-11	18.4323
18949	Pnn	pinin	-0.815291	7.24482	-12.8038	1.59635e-12	2.56827e-11	18.4077
66686	Dcbld1	discoidin, CUB and LCCL domain containing 1	-2.83151	2.76895	-12.8312	1.60198e-12	2.5748e-11	18.7231
11778	Ap3s2	adaptor-related protein complex 3, sigma 2 subunit	-0.82281	5.84779	-12.7969	1.61521e-12	2.59352e-11	18.4513
56248	Ak3	adenylate kinase 3	-1.00712	5.59156	-12.7857	1.64652e-12	2.64121e-11	18.4048
23827	Bpnt1	3'(2'), 5'-bisphosphate nucleotidase 1	-0.939412	6.11486	-12.7809	1.66028e-12	2.66068e-11	18.4151
52530	Nhp2	NHP2 ribonucleoprotein	-2.28184	7.13257	-12.8074	1.66829e-12	2.67089e-11	18.3826
54632	Ftsj1	FtsJ RNA methyltransferase homolog 1 (E. coli)	-1.18367	4.71962	-12.7774	1.67039e-12	2.67165e-11	18.4941
106759	Ticam1	toll-like receptor adaptor molecule 1	1.65395	3.99176	12.7727	1.68391e-12	2.69064e-11	18.6399
545085	Wdr70	WD repeat domain 70	-0.994022	5.19281	-12.7703	1.69062e-12	2.69873e-11	18.456
216551	Lgalsl	lectin, galactoside binding-like	-1.32131	5.40661	-12.768	1.69732e-12	2.70478e-11	18.4249
56292	Naa10	N(alpha)-acetyltransferase 10, NatA catalytic subunit	-1.3037	5.58281	-12.7679	1.69771e-12	2.70478e-11	18.3895
14853	Gspt2	G1 to S phase transition 2	-2.98923	0.831875	-12.7665	1.70189e-12	2.70615e-11	18.471
15529	Sdc2	syndecan 2	-3.6808	3.05967	-12.7953	1.70332e-12	2.70615e-11	18.5584
56282	Mrpl12	mitochondrial ribosomal protein L12	-2.1736	5.64728	-12.7952	1.70353e-12	2.70615e-11	18.4261
93692	Glrx	glutaredoxin	1.98866	3.52539	12.7934	1.7087e-12	2.71174e-11	18.5314
270685	Mthfd1l	methylenetetrahydrofolate dehydrogenase (NADP+ dependent) 1-like	-1.19422	6.4122	-12.7605	1.71951e-12	2.72625e-11	18.3728
19687	Rfc1	replication factor C (activator 1) 1	-1.00379	7.07239	-12.7569	1.73009e-12	2.74038e-11	18.3388
107449	Unc5b	unc-5 netrin receptor B	-1.74234	7.50642	-12.7792	1.75097e-12	2.77077e-11	18.3185
13730	Emp1	epithelial membrane protein 1	-1.35681	10.2729	-12.7695	1.76208e-12	2.78566e-11	18.3011
69912	Nup43	nucleoporin 43	-2.28674	5.14194	-12.7667	1.78871e-12	2.82502e-11	18.4248
20666	Sox11	SRY (sex determining region Y)-box 11	-3.30707	0.701735	-12.7544	1.79993e-12	2.84001e-11	18.584
19183	Psmc3ip	proteasome (prosome, macropain) 26S subunit, ATPase 3, interacting protein	-2.27383	3.64358	-12.7622	1.80259e-12	2.84146e-11	18.5439
246782	Atpaf2	ATP synthase mitochondrial F1 complex assembly factor 2	-1.01038	5.14607	-12.7312	1.80816e-12	2.84751e-11	18.3893
19192	Psme3	proteaseome (prosome, macropain) activator subunit 3 (PA28 gamma, Ki)	-1.20866	7.4417	-12.7239	1.83129e-12	2.88115e-11	18.2701
108956	Apol7c	apolipoprotein L 7c	7.66506	-5.05079	12.7228	1.83471e-12	2.88378e-11	14.8552
407795	Smim31	small integral membrane protein 31	-7.27107	-3.59998	-12.7056	1.88988e-12	2.96763e-11	16.4874
269338	Vps39	VPS39 HOPS complex subunit	1.36311	5.36971	12.7014	1.90358e-12	2.98629e-11	18.3564
108735	Sft2d2	SFT2 domain containing 2	1.31713	7.27112	12.708	1.91015e-12	2.99372e-11	18.2533
74055	Plce1	phospholipase C, epsilon 1	-3.68118	1.55751	-12.7107	1.96892e-12	3.08289e-11	18.5292
52589	Ncald	neurocalcin delta	-3.34872	0.892632	-12.6793	1.97743e-12	3.09324e-11	18.33
17769	Mthfr	methylenetetrahydrofolate reductase	2.23854	5.13043	12.7057	1.98611e-12	3.10386e-11	18.382
64707	Suv39h2	suppressor of variegation 3-9 2	-1.1592	4.33768	-12.6593	2.04696e-12	3.19592e-11	18.3385
20817	Srpk2	serine/arginine-rich protein specific kinase 2	1.44504	5.82793	12.6642	2.06983e-12	3.22854e-11	18.2242
83671	Sytl2	synaptotagmin-like 2	-4.11694	2.24661	-12.6713	2.10694e-12	3.28329e-11	18.4469
56278	Gkap1	G kinase anchoring protein 1	-1.95618	3.67847	-12.6587	2.10959e-12	3.2843e-11	18.372
15378	Hnf4a	hepatic nuclear factor 4, alpha	-4.24174	1.96465	-12.6698	2.1127e-12	3.28602e-11	18.435
11991	Hnrnpd	heterogeneous nuclear ribonucleoprotein D	-1.16948	8.26296	-12.6226	2.18112e-12	3.38922e-11	18.0798
20356	Sema5a	sema domain, seven thrombospondin repeats (type 1 and type 1-like), transmembrane domain (TM) and short cytoplasmic domain, (semaphorin) 5A	-4.74679	1.34138	-12.6384	2.23023e-12	3.46225e-11	18.3744
100861625	NA	NA	-4.30089	-0.253065	-12.6289	2.24674e-12	3.48457e-11	18.1834
12563	Cdh6	cadherin 6	-3.48734	4.74887	-12.618	2.31014e-12	3.57952e-11	18.224
215705	Arrdc1	arrestin domain containing 1	1.47749	5.8255	12.6	2.32558e-12	3.60003e-11	18.1154
13681	Eif4a1	eukaryotic translation initiation factor 4A1	-1.22247	10.3171	-12.5846	2.35537e-12	3.6427e-11	18.0011
26570	Slc7a11	solute carrier family 7 (cationic amino acid transporter, y+ system), member 11	1.84659	7.952	12.5971	2.3948e-12	3.7002e-11	18.0479
171212	Galnt10	polypeptide N-acetylgalactosaminyltransferase 10	-1.12195	6.4465	-12.5449	2.49635e-12	3.85346e-11	17.9803
433804	Zfp985	zinc finger protein 985	-6.88499	-2.99751	-12.5669	2.51941e-12	3.8854e-11	17.0651
66140	Ska2	spindle and kinetochore associated complex subunit 2	-1.80226	5.24501	-12.5559	2.5722e-12	3.96307e-11	18.0398
23871	Ets1	E26 avian leukemia oncogene 1, 5' domain	-1.61925	6.68383	-12.552	2.58946e-12	3.98591e-11	17.9532
18673	Phb	prohibitin	-1.54478	6.93846	-12.5489	2.6036e-12	4.00393e-11	17.9242
231506	Lin54	lin-54 homolog (C. elegans)	-1.09979	5.4655	-12.52	2.60668e-12	4.00451e-11	18.0127
16648	Kpna3	karyopherin (importin) alpha 3	-1.11718	7.2284	-12.5195	2.60888e-12	4.00451e-11	17.9097
68477	Rmnd5a	required for meiotic nuclear division 5 homolog A	1.66944	6.17391	12.5451	2.62078e-12	4.01902e-11	17.9706
58809	Rnase4	ribonuclease, RNase A family 4	2.6664	4.77395	12.5412	2.63855e-12	4.04248e-11	18.0488
66168	Grina	glutamate receptor, ionotropic, N-methyl D-aspartate-associated protein 1 (glutamate binding)	1.14867	7.38536	12.5097	2.65421e-12	4.06267e-11	17.8899
74133	Smg8	smg-8 homolog, nonsense mediated mRNA decay factor (C. elegans)	-0.900612	5.41886	-12.509	2.6575e-12	4.06392e-11	17.9824
26397	Map2k3	mitogen-activated protein kinase kinase 3	-1.48429	7.0996	-12.5359	2.66285e-12	4.06829e-11	17.8987
70546	Zdhhc2	zinc finger, DHHC domain containing 2	-1.92688	4.8234	-12.5294	2.69299e-12	4.11052e-11	18.03
71643	Zgrf1	zinc finger, GRF-type containing 1	-1.53665	3.82793	-12.5008	2.69574e-12	4.11087e-11	18.1245
100273	Osbpl9	oxysterol binding protein-like 9	1.1506	6.8825	12.4995	2.70165e-12	4.11606e-11	17.8949
22099	Tsn	translin	-0.922685	7.21826	-12.4975	2.71089e-12	4.12629e-11	17.8671
217232	Cdc27	cell division cycle 27	-1.16709	6.98206	-12.4962	2.71738e-12	4.13233e-11	17.8729
223881	Rnd1	Rho family GTPase 1	-2.00684	5.04922	-12.5222	2.72677e-12	4.14277e-11	18.0304
50799	Slc25a13	solute carrier family 25 (mitochondrial carrier, adenine nucleotide translocator), member 13	-1.0918	5.48891	-12.4848	2.77173e-12	4.20621e-11	17.9569
70044	Tut1	terminal uridylyl transferase 1, U6 snRNA-specific	-1.03217	5.47665	-12.4844	2.77366e-12	4.20621e-11	17.9286
80911	Acox3	acyl-Coenzyme A oxidase 3, pristanoyl	3.09958	3.78585	12.5053	2.80847e-12	4.2517e-11	18.1347
68147	Gar1	GAR1 ribonucleoprotein	-1.33677	6.11889	-12.4858	2.80885e-12	4.2517e-11	17.8802
107271	Yars	tyrosyl-tRNA synthetase	-1.00229	6.76882	-12.4735	2.8273e-12	4.27567e-11	17.853
66880	Rsrc1	arginine/serine-rich coiled-coil 1	-1.02709	5.18076	-12.4598	2.89573e-12	4.37512e-11	17.8976
105372	Utp15	UTP15 small subunit processome component	-1.10451	5.85315	-12.4535	2.92753e-12	4.41909e-11	17.8527
208691	Eif5a2	eukaryotic translation initiation factor 5A2	-2.59388	3.31921	-12.4804	2.93243e-12	4.42241e-11	18.0811
67053	Rpp14	ribonuclease P 14 subunit	-1.47442	5.18555	-12.4515	3.01142e-12	4.53494e-11	17.8587
18597	Pdha1	pyruvate dehydrogenase E1 alpha 1	-1.05049	7.18665	-12.4372	3.01259e-12	4.53494e-11	17.7627
21956	Tnnt2	troponin T2, cardiac	-2.10458	7.33817	-12.4606	3.03561e-12	4.5654e-11	17.7711
20630	Snrpc	U1 small nuclear ribonucleoprotein C	-1.29438	5.69245	-12.4303	3.0493e-12	4.58178e-11	17.8174
74580	Pyroxd2	pyridine nucleotide-disulphide oxidoreductase domain 2	4.6508	1.18571	12.4547	3.06675e-12	4.60378e-11	17.9581
234258	Neil3	nei like 3 (E. coli)	-2.02202	3.78983	-12.4535	3.07323e-12	4.60928e-11	17.9822
19122	Prnp	prion protein	-1.36592	6.13408	-12.4391	3.07705e-12	4.61079e-11	17.7855
226026	Smc5	structural maintenance of chromosomes 5	-1.0616	6.90702	-12.4231	3.088e-12	4.62296e-11	17.7409
13972	Gnb1l	guanine nucleotide binding protein (G protein), beta polypeptide 1-like	-1.97566	2.96227	-12.4206	3.10153e-12	4.63898e-11	18.0406
65099	Irak1bp1	interleukin-1 receptor-associated kinase 1 binding protein 1	-4.19383	0.917221	-12.4452	3.11302e-12	4.65192e-11	17.9128
66194	Pycrl	pyrroline-5-carboxylate reductase-like	-1.5326	5.61339	-12.4436	3.12691e-12	4.66842e-11	17.7986
105440	Kctd9	potassium channel tetramerisation domain containing 9	-0.963141	5.75235	-12.414	3.13768e-12	4.68023e-11	17.8022
17966	Nbr1	NBR1, autophagy cargo receptor	1.04348	6.83545	12.4118	3.14951e-12	4.69361e-11	17.739
50912	Exosc10	exosome component 10	-0.862411	6.69897	-12.4081	3.17e-12	4.71984e-11	17.7287
67144	Lrrc40	leucine rich repeat containing 40	-1.35485	5.86092	-12.4029	3.24669e-12	4.82964e-11	17.748
69548	2310015A10Rik	RIKEN cDNA 2310015A10 gene	2.59006	2.20245	12.3918	3.26231e-12	4.84847e-11	18.0159
66922	Rras2	related RAS viral (r-ras) oncogene 2	-1.49715	6.72292	-12.4032	3.35553e-12	4.97952e-11	17.6797
65102	Nif3l1	Ngg1 interacting factor 3-like 1 (S. pombe)	-1.41264	5.74097	-12.3863	3.35657e-12	4.97952e-11	17.7307
21413	Tcf4	transcription factor 4	1.42691	4.77648	12.3822	3.36678e-12	4.98564e-11	17.7477
70045	2610528A11Rik	RIKEN cDNA 2610528A11 gene	-5.5426	1.28349	-12.4013	3.36678e-12	4.98564e-11	17.9486
20363	Selenop	selenoprotein P	4.13107	2.53666	12.3985	3.38361e-12	5.00603e-11	17.696
245945	Rbm47	RNA binding motif protein 47	1.62938	5.65149	12.3947	3.40597e-12	5.03456e-11	17.745
57028	Pdxp	pyridoxal (pyridoxine, vitamin B6) phosphatase	-1.53603	3.58469	-12.3609	3.44404e-12	5.08625e-11	17.8886
15212	Hexb	hexosaminidase B	2.9102	4.84141	12.3822	3.48103e-12	5.13624e-11	17.7969
53600	Timm23	translocase of inner mitochondrial membrane 23	-1.85712	5.70151	-12.3756	3.52165e-12	5.1915e-11	17.6874
69051	Pycr2	pyrroline-5-carboxylate reductase family, member 2	-1.64378	4.68427	-12.3621	3.53806e-12	5.211e-11	17.7598
21399	Tcea1	transcription elongation factor A (SII) 1	-1.43187	6.66818	-12.366	3.5817e-12	5.27054e-11	17.6094
209200	Dtx3l	deltex 3-like, E3 ubiquitin ligase	2.93883	3.16354	12.3638	3.5951e-12	5.28551e-11	17.8633
18602	Padi4	peptidyl arginine deiminase, type IV	3.79367	4.00227	12.3629	3.60111e-12	5.28959e-11	17.8555
26433	Plod3	procollagen-lysine, 2-oxoglutarate 5-dioxygenase 3	1.11022	6.90815	12.3329	3.61818e-12	5.30991e-11	17.5862
15182	Hdac2	histone deacetylase 2	-1.35852	6.70958	-12.3465	3.67609e-12	5.38896e-11	17.5686
57230	Sap30bp	SAP30 binding protein	-0.888741	5.62497	-12.3235	3.67863e-12	5.38896e-11	17.6311
19707	Reps1	RalBP1 associated Eps domain containing protein	-1.35718	5.74668	-12.3299	3.69103e-12	5.40092e-11	17.6206
20229	Sat1	spermidine/spermine N1-acetyl transferase 1	2.70867	5.8191	12.3485	3.69339e-12	5.40092e-11	17.6144
16188	Il3ra	interleukin 3 receptor, alpha chain	2.96582	2.78277	12.3156	3.72988e-12	5.44942e-11	17.8632
50926	Hnrnpdl	heterogeneous nuclear ribonucleoprotein D-like	-0.958544	8.18576	-12.3139	3.74099e-12	5.46078e-11	17.5273
56077	Dgke	diacylglycerol kinase, epsilon	-1.26266	4.72333	-12.3093	3.77204e-12	5.5012e-11	17.6927
56347	Eif3c	eukaryotic translation initiation factor 3, subunit C	-0.955434	8.95336	-12.3074	3.78469e-12	5.51473e-11	17.5144
20346	Sema3a	sema domain, immunoglobulin domain (Ig), short basic domain, secreted, (semaphorin) 3A	-3.15133	3.22571	-12.3319	3.80255e-12	5.53584e-11	17.8307
18519	Kat2b	K(lysine) acetyltransferase 2B	1.16877	5.18817	12.3021	3.82012e-12	5.55647e-11	17.6121
320709	Tmem117	transmembrane protein 117	-5.64711	0.833906	-12.3287	3.82391e-12	5.55706e-11	17.5999
20826	Snu13	SNU13 homolog, small nuclear ribonucleoprotein (U4/U6.U5)	-1.95935	7.03575	-12.3241	3.85492e-12	5.59715e-11	17.5278
11947	Atp5b	ATP synthase, H+ transporting mitochondrial F1 complex, beta subunit	-0.962004	10.1163	-12.2957	3.86366e-12	5.60488e-11	17.492
29861	Dpf1	D4, zinc and double PHD fingers family 1	-2.25357	1.59669	-12.2898	3.90376e-12	5.65804e-11	17.8244
18414	Osmr	oncostatin M receptor	5.13789	2.74158	12.3045	3.99021e-12	5.77822e-11	17.7851
494504	Apcdd1	adenomatosis polyposis coli down-regulated 1	-4.52164	2.43939	-12.2928	4.07277e-12	5.89256e-11	17.8008
100043772	Zfp850	zinc finger protein 850	-1.42522	3.83089	-12.2652	4.07734e-12	5.89397e-11	17.7158
107767	Scamp1	secretory carrier membrane protein 1	1.47112	5.58318	12.2861	4.0817e-12	5.89507e-11	17.5309
67824	Nmral1	NmrA-like family domain containing 1	-1.6189	3.89232	-12.2693	4.1361e-12	5.96838e-11	17.6121
107508	Eprs	glutamyl-prolyl-tRNA synthetase	-1.06359	8.60458	-12.2553	4.14908e-12	5.98184e-11	17.4228
58223	Mmp19	matrix metallopeptidase 19	5.72395	1.58939	12.2784	4.17792e-12	6.01812e-11	17.7418
230125	Slc25a51	solute carrier family 25, member 51	0.849173	6.17959	12.2487	4.1979e-12	6.03845e-11	17.4617
18164	Nptx1	neuronal pentraxin 1	-3.07024	4.71011	-12.2752	4.20116e-12	6.03845e-11	17.5704
27979	Eif3b	eukaryotic translation initiation factor 3, subunit B	-1.02486	9.11908	-12.248	4.2031e-12	6.03845e-11	17.4053
68106	Nt5c3b	5'-nucleotidase, cytosolic IIIB	-1.6483	5.2323	-12.2682	4.2538e-12	6.10594e-11	17.512
66897	Naa16	N(alpha)-acetyltransferase 16, NatA auxiliary subunit	-0.935045	4.74401	-12.2372	4.28468e-12	6.14488e-11	17.5157
353258	Ltv1	LTV1 ribosome biogenesis factor	-1.3046	5.72965	-12.2372	4.28867e-12	6.14521e-11	17.4693
71909	Haus5	HAUS augmin-like complex, subunit 5	-1.26178	3.99142	-12.2357	4.29609e-12	6.15047e-11	17.5841
26359	Anxa10	annexin A10	-6.02405	-1.88406	-12.2548	4.35504e-12	6.22942e-11	17.4383
103140	Gstt3	glutathione S-transferase, theta 3	5.59995	1.62416	12.2512	4.38332e-12	6.2644e-11	17.1622
56055	Gtpbp2	GTP binding protein 2	1.99438	5.93448	12.2444	4.43618e-12	6.33442e-11	17.4737
21937	Tnfrsf1a	tumor necrosis factor receptor superfamily, member 1a	1.1389	6.50769	12.2115	4.48424e-12	6.39747e-11	17.3784
20732	Spint1	serine protease inhibitor, Kunitz type 1	3.28571	5.68705	12.2244	4.59546e-12	6.54671e-11	17.4792
100216534	Snord96a	small nucleolar RNA, C/D box 96A	-1.40907	3.58133	-12.1975	4.59685e-12	6.54671e-11	17.571
12144	Blm	Bloom syndrome, RecQ like helicase	-1.55152	4.55466	-12.1935	4.64039e-12	6.60298e-11	17.5043
108961	E2f8	E2F transcription factor 8	-1.77437	5.23223	-12.215	4.67244e-12	6.64282e-11	17.4294
12010	B2m	beta-2 microglobulin	2.58472	8.48127	12.214	4.68052e-12	6.64766e-11	17.3044
207521	Dtx4	deltex 4, E3 ubiquitin ligase	1.1967	5.42102	12.187	4.68397e-12	6.64766e-11	17.3965
226747	Ahctf1	AT hook containing transcription factor 1	-1.34795	7.56996	-12.2082	4.71371e-12	6.68407e-11	17.3044
100609	Nsun5	NOL1/NOP2/Sun domain family, member 5	-0.990467	4.60158	-12.1799	4.74295e-12	6.71973e-11	17.4552
57278	Bcam	basal cell adhesion molecule	3.7761	4.00042	12.2034	4.76984e-12	6.75198e-11	17.5503
12070	Bex3	brain expressed X-linked 3	-1.85643	5.89576	-12.1981	4.81451e-12	6.80932e-11	17.3415
12812	Coil	coilin	-1.24436	3.13193	-12.1692	4.83391e-12	6.83087e-11	17.5777
65100	Zic5	zinc finger protein of the cerebellum 5	-4.18633	-0.296775	-12.1667	4.85559e-12	6.85559e-11	17.2037
66355	Gmpr	guanosine monophosphate reductase	-1.94149	2.70883	-12.1724	4.86236e-12	6.85924e-11	17.5673
52686	Mettl2	methyltransferase like 2	-0.865473	5.36439	-12.1635	4.88374e-12	6.88347e-11	17.3667
20186	Nr1h4	nuclear receptor subfamily 1, group H, member 4	-6.60098	-0.854636	-12.1872	4.9083e-12	6.91213e-11	16.9607
70451	Dhrs13	dehydrogenase/reductase (SDR family) member 13	-1.60468	4.23804	-12.1585	4.98861e-12	7.0192e-11	17.4409
634731	Susd1	sushi domain containing 1	4.15163	3.30216	12.17	5.06019e-12	7.1138e-11	17.5878
66468	Ska1	spindle and kinetochore associated complex subunit 1	-2.19197	3.36965	-12.1662	5.09466e-12	7.15612e-11	17.5134
13836	Epha2	Eph receptor A2	-1.72561	8.78286	-12.165	5.10503e-12	7.16454e-11	17.2131
57265	Fzd2	frizzled class receptor 2	-1.96371	4.00205	-12.164	5.11404e-12	7.17104e-11	17.4214
68801	Elovl5	ELOVL family member 5, elongation of long chain fatty acids (yeast)	-0.879771	6.70972	-12.133	5.15611e-12	7.22385e-11	17.2263
74111	Rbm19	RNA binding motif protein 19	-1.03057	5.99462	-12.1299	5.18447e-12	7.2525e-11	17.2642
83673	Snhg1	small nucleolar RNA host gene 1	-2.45819	7.22399	-12.1562	5.18542e-12	7.2525e-11	17.2188
78903	Wrnip1	Werner helicase interacting protein 1	-0.892909	6.05507	-12.1281	5.20139e-12	7.26864e-11	17.255
56505	Ruvbl1	RuvB-like protein 1	-1.00698	6.48056	-12.1181	5.29549e-12	7.39382e-11	17.2104
380629	Heca	hdc homolog, cell cycle regulator	2.11072	3.98858	12.1343	5.31586e-12	7.41594e-11	17.4878
54609	Ubqln2	ubiquilin 2	-1.4333	6.1176	-12.1405	5.33258e-12	7.43294e-11	17.2082
66585	Snrnp40	small nuclear ribonucleoprotein 40 (U5)	-1.08089	6.07779	-12.111	5.3627e-12	7.46857e-11	17.2194
74427	Eaf1	ELL associated factor 1	-0.972573	7.39558	-12.1076	5.3953e-12	7.50758e-11	17.1722
26905	Eif2s3x	eukaryotic translation initiation factor 2, subunit 3, structural gene X-linked	-1.53972	7.07791	-12.133	5.40367e-12	7.51284e-11	17.175
56357	Ivd	isovaleryl coenzyme A dehydrogenase	2.64085	5.23938	12.12	5.53041e-12	7.68253e-11	17.322
13684	Eif4e	eukaryotic translation initiation factor 4E	-1.41424	7.59275	-12.1107	5.62295e-12	7.80447e-11	17.1237
211548	Nomo1	nodal modulator 1	-1.06206	7.23324	-12.0829	5.63852e-12	7.81704e-11	17.1201
69237	Gtpbp4	GTP binding protein 4	-1.06558	7.24874	-12.0825	5.643e-12	7.81704e-11	17.1256
319322	Sf3b2	splicing factor 3b, subunit 2	-1.008	8.30966	-12.0821	5.64633e-12	7.81704e-11	17.1058
114643	Oas1c	2'-5' oligoadenylate synthetase 1C	8.68574	-0.717597	12.0802	5.6664e-12	7.8382e-11	14.1973
50755	Fbh1	F-box DNA helicase 1	0.994177	6.20151	12.0777	5.69136e-12	7.86608e-11	17.152
110213	Tmbim6	transmembrane BAX inhibitor motif containing 6	0.819063	8.91754	12.0762	5.70687e-12	7.88087e-11	17.0925
20170	Hps6	HPS6, biogenesis of lysosomal organelles complex 2 subunit 3	-1.20294	3.95172	-12.0725	5.74468e-12	7.9264e-11	17.3136
214572	Prmt7	protein arginine N-methyltransferase 7	-1.08978	6.17278	-12.0718	5.75188e-12	7.92966e-11	17.1396
56316	Ggcx	gamma-glutamyl carboxylase	1.28623	4.0283	12.0704	5.76625e-12	7.93869e-11	17.3341
20496	Slc12a2	solute carrier family 12, member 2	-2.19428	7.49927	-12.0963	5.76813e-12	7.93869e-11	17.0974
108121	U2af1	U2 small nuclear ribonucleoprotein auxiliary factor (U2AF) 1	-1.45408	6.931	-12.0943	5.78968e-12	7.96166e-11	17.1051
19340	Rab3d	RAB3D, member RAS oncogene family	2.35448	3.61905	12.0928	5.80431e-12	7.97508e-11	17.3933
103573	Xpo1	exportin 1	-1.17454	8.53537	-12.0643	5.89604e-12	8.09432e-11	17.0615
18145	Npc1	NPC intracellular cholesterol transporter 1	1.93185	5.66457	12.0792	5.94751e-12	8.15815e-11	17.1682
226841	Vash2	vasohibin 2	-1.72513	4.91264	-12.0762	5.97882e-12	8.19424e-11	17.2392
239570	Ttc38	tetratricopeptide repeat domain 38	2.50774	2.97607	12.0568	6.00477e-12	8.22292e-11	17.4241
19205	Ptbp1	polypyrimidine tract binding protein 1	-1.0047	8.76357	-12.0439	6.04676e-12	8.27351e-11	17.0338
85031	Pla1a	phospholipase A1 member A	4.60254	1.21296	12.0622	6.0928e-12	8.32954e-11	17.1226
381493	S100a7a	S100 calcium binding protein A7A	-2.86398	2.26421	-12.0574	6.13447e-12	8.37951e-11	17.4064
12702	Socs3	suppressor of cytokine signaling 3	3.18295	4.57122	12.0604	6.15032e-12	8.39416e-11	17.1863
328258	Slc25a48	solute carrier family 25, member 48	-2.25355	2.68529	-12.0564	6.15658e-12	8.39571e-11	17.3568
71306	Mfap3l	microfibrillar-associated protein 3-like	-3.48907	3.65248	-12.0588	6.16746e-12	8.40355e-11	17.3904
17691	Sik1	salt inducible kinase 1	1.92597	6.72465	12.0546	6.214e-12	8.45992e-11	17.0713
58998	Nectin3	nectin cell adhesion molecule 3	-3.73149	1.81669	-12.0535	6.22569e-12	8.4688e-11	17.3684
19212	Pter	phosphotriesterase related	-2.41924	1.83434	-12.0512	6.24271e-12	8.48491e-11	17.3624
100532	Rell1	RELT-like 1	1.06002	5.87489	12.0251	6.25394e-12	8.48664e-11	17.0949
72284	LTO1	ABCE maturation factor	1.32442	3.57629	12.025	6.25435e-12	8.48664e-11	17.3172
72040	Cdhr5	cadherin-related family member 5	-8.11237	-1.58897	-12.048	6.28718e-12	8.52292e-11	16.4034
14359	Fxr1	fragile X mental retardation gene 1, autosomal homolog	-0.971256	7.49349	-12.0217	6.2915e-12	8.52292e-11	17.0039
19355	Rad1	RAD1 checkpoint DNA exonuclease	-1.18715	3.75504	-12.0162	6.35474e-12	8.60148e-11	17.2502
328099	Prps1l3	phosphoribosyl pyrophosphate synthetase 1-like 3	-1.07634	6.12586	-12.0136	6.38376e-12	8.63362e-11	17.0266
270162	Elmod1	ELMO/CED-12 domain containing 1	-7.81638	-1.96975	-12.0378	6.40293e-12	8.65241e-11	16.1886
228026	Pdk1	pyruvate dehydrogenase kinase, isoenzyme 1	1.18938	6.4951	12.0061	6.471e-12	8.73718e-11	17.0036
67728	Dph2	DPH2 homolog	-1.09424	4.66595	-12.0014	6.52578e-12	8.80389e-11	17.1435
74112	Usp16	ubiquitin specific peptidase 16	-0.976499	5.78947	-11.9989	6.55511e-12	8.83618e-11	17.011
93694	Clec2d	C-type lectin domain family 2, member d	5.05086	0.764279	12.0225	6.58145e-12	8.86439e-11	17.3114
20442	St3gal1	ST3 beta-galactoside alpha-2,3-sialyltransferase 1	1.76884	6.47962	12.0194	6.61783e-12	8.90607e-11	17.0035
14463	Gata4	GATA binding protein 4	-1.57196	4.8393	-12.0121	6.63224e-12	8.91813e-11	17.1035
94063	Mrpl16	mitochondrial ribosomal protein L16	-1.60458	5.03231	-12.0158	6.66097e-12	8.94942e-11	17.0529
319448	Fndc3a	fibronectin type III domain containing 3A	1.61172	5.91128	12.015	6.66996e-12	8.95414e-11	17.0059
15228	Foxg1	forkhead box G1	-4.42373	4.41708	-12.0107	6.72153e-12	9.01599e-11	17.1578
16985	Lsp1	lymphocyte specific 1	6.23139	2.51459	12.0052	6.7878e-12	9.09743e-11	17.2892
12475	Cd14	CD14 antigen	4.21324	5.06174	12.0015	6.83272e-12	9.14406e-11	17.0619
66276	1810009A15Rik	RIKEN cDNA 1810009A15 gene	-2.0183	5.40045	-12.0015	6.83376e-12	9.14406e-11	16.998
84094	Plvap	plasmalemma vesicle associated protein	6.72137	0.78689	11.9984	6.87071e-12	9.186e-11	16.6168
20017	Polr1b	polymerase (RNA) I polypeptide B	-1.24386	6.74404	-11.9739	6.9457e-12	9.27869e-11	16.9361
79560	Ublcp1	ubiquitin-like domain containing CTD phosphatase 1	-1.32977	5.21618	-11.9635	6.98652e-12	9.32561e-11	17.008
14824	Grn	granulin	2.19723	8.03435	11.9842	7.04853e-12	9.40072e-11	16.8878
226250	Afap1l2	actin filament associated protein 1-like 2	5.7703	3.11679	11.9825	7.06975e-12	9.42134e-11	16.7507
216877	Dhx33	DEAH (Asp-Glu-Ala-His) box polypeptide 33	-1.35889	6.02442	-11.97	7.09321e-12	9.44493e-11	16.9432
11972	Atp6v0d1	ATPase, H+ transporting, lysosomal V0 subunit D1	1.27603	6.48193	11.9613	7.1266e-12	9.48168e-11	16.9219
12125	Bcl2l11	BCL2-like 11 (apoptosis facilitator)	1.8166	6.02347	11.9724	7.19867e-12	9.56979e-11	16.9766
230935	Dnajc11	DnaJ heat shock protein family (Hsp40) member C11	-0.91095	6.3603	-11.9412	7.27175e-12	9.6591e-11	16.892
242466	Zfp462	zinc finger protein 462	-3.8343	2.88981	-11.9604	7.3561e-12	9.76322e-11	17.2267
671878	Sms-ps	spermine synthase, pseudogene	-1.6542	4.27066	-11.9516	7.40682e-12	9.82259e-11	17.0216
72554	Utp14a	UTP14A small subunit processome component	-1.41392	5.15871	-11.934	7.50751e-12	9.94806e-11	16.9336
72046	Urgcp	upregulator of cell proliferation	-1.05517	5.46723	-11.9231	7.51368e-12	9.94818e-11	16.8992
19663	Rbpms	RNA binding protein gene with multiple splicing	1.75687	5.60437	11.9408	7.57468e-12	1.00209e-10	17.0282
68667	Trpm4	transient receptor potential cation channel, subfamily M, member 4	1.56063	3.96394	11.9143	7.63379e-12	1.00909e-10	17.0888
12567	Cdk4	cyclin-dependent kinase 4	-1.26392	8.40796	-11.9272	7.72616e-12	1.02048e-10	16.7878
66590	Farsa	phenylalanyl-tRNA synthetase, alpha subunit	-0.933824	6.73663	-11.9049	7.76424e-12	1.02468e-10	16.8112
14466	Gba	glucosidase, beta, acid	1.02795	6.14968	11.9035	7.7851e-12	1.02655e-10	16.834
17151	Ccndbp1	cyclin D-type binding-protein 1	0.919681	5.58391	11.903	7.79094e-12	1.02655e-10	16.887
382038	Urb2	URB2 ribosome biogenesis 2 homolog (S. cerevisiae)	-1.28532	6.62134	-11.9151	7.80145e-12	1.02711e-10	16.8199
613262	BC029722	cDNA sequence BC029722	-1.21386	4.83509	-11.9011	7.81844e-12	1.02852e-10	16.9224
57246	Tbx20	T-box 20	-5.0281	-1.70121	-11.9257	7.8292e-12	1.02911e-10	16.8128
68539	Tmem109	transmembrane protein 109	-1.12537	6.98358	-11.8966	7.88287e-12	1.03486e-10	16.7805
94094	Trim34a	tripartite motif-containing 34A	6.61458	0.237057	11.9209	7.8856e-12	1.03486e-10	16.0787
15893	Ica1	islet cell autoantigen 1	-2.3136	3.98113	-11.9193	7.92089e-12	1.03866e-10	17.0905
230801	Pigv	phosphatidylinositol glycan anchor biosynthesis, class V	1.78274	2.85377	11.8894	7.98629e-12	1.0464e-10	17.1325
381650	Thap6	THAP domain containing 6	2.3576	4.10198	11.9135	8.00306e-12	1.04776e-10	17.0435
66826	Taz	tafazzin	1.10015	4.05831	11.8872	8.01813e-12	1.04889e-10	16.9405
12452	Ccng2	cyclin G2	2.02539	6.19501	11.9079	8.08401e-12	1.05666e-10	16.826
16180	Il1rap	interleukin 1 receptor accessory protein	1.801	4.03707	11.904	8.11091e-12	1.05933e-10	16.9707
73225	Fam118a	family with sequence similarity 118, member A	-1.32375	4.5916	-11.8803	8.11866e-12	1.0595e-10	16.9297
19219	Ptger4	prostaglandin E receptor 4 (subtype EP4)	3.65046	3.13007	11.9031	8.15525e-12	1.06343e-10	17.1251
27387	Sh2d3c	SH2 domain containing 3C	3.99142	2.47185	11.9024	8.16546e-12	1.06391e-10	17.0319
50917	Galns	galactosamine (N-acetyl)-6-sulfate sulfatase	1.06283	4.68979	11.8762	8.17904e-12	1.06484e-10	16.8721
74043	Pex26	peroxisomal biogenesis factor 26	1.89245	4.21583	11.8883	8.18941e-12	1.06502e-10	17.0198
73212	3110082I17Rik	RIKEN cDNA 3110082I17 gene	-1.45803	5.2441	-11.8938	8.19344e-12	1.06502e-10	16.8435
78523	Mrpl9	mitochondrial ribosomal protein L9	-1.22816	6.43273	-11.8795	8.22093e-12	1.06774e-10	16.764
213649	Arhgef19	Rho guanine nucleotide exchange factor (GEF) 19	2.78047	2.99307	11.8975	8.2372e-12	1.06901e-10	17.0917
232430	Crebl2	cAMP responsive element binding protein-like 2	2.58567	2.65565	11.8588	8.44026e-12	1.09448e-10	17.0888
14375	Xrcc6	X-ray repair complementing defective repair in Chinese hamster cells 6	-1.1447	6.109	-11.8584	8.44682e-12	1.09448e-10	16.74
67488	Calcoco1	calcium binding and coiled coil domain 1	1.90337	5.42809	11.8795	8.50907e-12	1.10167e-10	16.8788
12296	Cacnb2	calcium channel, voltage-dependent, beta 2 subunit	-3.50955	1.87056	-11.8772	8.54519e-12	1.10509e-10	17.0645
320311	Rnf152	ring finger protein 152	3.19448	2.0254	11.8769	8.54898e-12	1.10509e-10	17.0785
67842	Nop9	NOP9 nucleolar protein	-1.27775	5.64189	-11.8531	8.56689e-12	1.10653e-10	16.7654
21780	Tfam	transcription factor A, mitochondrial	-1.1409	5.49362	-11.8493	8.58703e-12	1.10783e-10	16.771
18759	Prkci	protein kinase C, iota	-1.46217	7.02324	-11.8742	8.59043e-12	1.10783e-10	16.7147
15139	Hc	hemolytic complement	7.48521	0.0687493	11.8618	8.61588e-12	1.11024e-10	15.2869
14297	Fxn	frataxin	-1.87502	3.69209	-11.865	8.6427e-12	1.11282e-10	16.9472
54124	Cks1b	CDC28 protein kinase 1b	-2.02224	7.01264	-11.8666	8.70978e-12	1.12057e-10	16.6921
72479	Hsdl2	hydroxysteroid dehydrogenase like 2	1.74137	4.22234	11.85	8.76931e-12	1.12734e-10	16.9125
18782	Pla2g2d	phospholipase A2, group IID	7.36176	-4.83726	11.8325	8.85239e-12	1.13613e-10	13.8318
56419	Diaph3	diaphanous related formin 3	-1.77284	5.29882	-11.8574	8.8552e-12	1.13613e-10	16.7922
73192	Xpot	exportin, tRNA (nuclear export receptor for tRNAs)	-1.10001	7.28941	-11.8321	8.85845e-12	1.13613e-10	16.6658
13197	Gadd45a	growth arrest and DNA-damage-inducible 45 alpha	3.09578	4.37923	11.8488	8.9952e-12	1.15276e-10	16.9599
15396	Hoxa11	homeobox A11	-6.20381	-5.36095	-11.8215	9.03123e-12	1.15648e-10	15.1461
329540	Nol4l	nucleolar protein 4-like	1.98763	4.95906	11.8412	9.1182e-12	1.1667e-10	16.7776
56454	Aldh18a1	aldehyde dehydrogenase 18 family, member A1	-1.06033	7.17395	-11.8141	9.15277e-12	1.17021e-10	16.6404
26380	Esrrb	estrogen related receptor, beta	-6.47931	-2.01407	-11.8114	9.19906e-12	1.17521e-10	15.2393
67891	Rpl4	ribosomal protein L4	-1.02824	10.335	-11.8105	9.21298e-12	1.17607e-10	16.6037
110052	Dek	DEK proto-oncogene (DNA binding)	-1.35952	7.65705	-11.8269	9.35808e-12	1.19367e-10	16.6001
80880	Kank3	KN motif and ankyrin repeat domains 3	2.88468	3.0013	11.822	9.44214e-12	1.20345e-10	16.9673
13830	Stom	stomatin	1.16647	6.96441	11.8027	9.44947e-12	1.20345e-10	16.5916
104360	Isl2	insulin related protein 2 (islet 2)	-2.77936	-0.538771	-11.791	9.5455e-12	1.21473e-10	16.6566
69101	Ydjc	YdjC homolog (bacterial)	-1.66336	3.42884	-11.7881	9.59745e-12	1.21979e-10	16.8422
217869	Eif5	eukaryotic translation initiation factor 5	-0.932255	8.57519	-11.7879	9.60017e-12	1.21979e-10	16.5605
19881	Rom1	rod outer segment membrane protein 1	2.17928	3.58249	11.8102	9.64531e-12	1.22458e-10	16.8576
319924	Apba1	amyloid beta (A4) precursor protein binding, family A, member 1	7.87228	0.108019	11.809	9.66692e-12	1.22637e-10	15.8584
14268	Fn1	fibronectin 1	2.86729	10.8704	11.8051	9.73527e-12	1.23409e-10	16.5558
231452	Sdad1	SDA1 domain containing 1	-0.72487	6.58459	-11.7781	9.7731e-12	1.23793e-10	16.5813
69780	Smap2	small ArfGAP 2	1.29652	5.61816	11.7842	9.78825e-12	1.23851e-10	16.629
69870	Polr3gl	polymerase (RNA) III (DNA directed) polypeptide G like	1.35154	2.69036	11.777	9.79284e-12	1.23851e-10	16.8886
22791	Dnajc2	DnaJ heat shock protein family (Hsp40) member C2	-1.14051	7.33096	-11.7761	9.80951e-12	1.23966e-10	16.5575
27060	Tcirg1	T cell, immune regulator 1, ATPase, H+ transporting, lysosomal V0 protein A3	1.92503	6.23984	11.7959	9.89812e-12	1.2499e-10	16.576
71778	Klhl5	kelch-like 5	2.04829	4.29692	11.7889	1.00253e-11	1.26498e-10	16.8034
70082	Lysmd2	LysM, putative peptidoglycan-binding, domain containing 2	-4.3564	1.37571	-11.7833	1.01272e-11	1.27685e-10	16.8602
14457	Gas7	growth arrest specific 7	9.49843	1.95857	11.7812	1.01661e-11	1.28069e-10	16.0633
76932	Arfip2	ADP-ribosylation factor interacting protein 2	-0.761944	5.86196	-11.7561	1.01733e-11	1.28069e-10	16.572
109910	Zfp91	zinc finger protein 91	-0.925998	6.97236	-11.7556	1.01811e-11	1.28069e-10	16.5161
12765	Cxcr2	chemokine (C-X-C motif) receptor 2	7.33126	0.45078	11.7725	1.03286e-11	1.29824e-10	16.3003
26926	Aifm1	apoptosis-inducing factor, mitochondrion-associated 1	-1.06743	6.20969	-11.7453	1.03742e-11	1.30298e-10	16.5197
19069	Nup88	nucleoporin 88	-0.744335	7.02867	-11.7425	1.04282e-11	1.30876e-10	16.4971
171531	Mlph	melanophilin	-3.29265	2.84318	-11.764	1.04887e-11	1.31476e-10	16.6698
107029	Me2	malic enzyme 2, NAD(+)-dependent, mitochondrial	-1.36909	6.14312	-11.763	1.04921e-11	1.31476e-10	16.5242
67198	Spats2l	spermatogenesis associated, serine-rich 2-like	-2.99658	-1.41364	-11.7444	1.05076e-11	1.3157e-10	16.8525
17190	Mbd1	methyl-CpG binding domain protein 1	1.43559	5.49463	11.7556	1.05388e-11	1.3186e-10	16.5809
108679	Cops8	COP9 signalosome subunit 8	-0.866024	6.64281	-11.7166	1.09339e-11	1.36699e-10	16.4589
24061	Smc1a	structural maintenance of chromosomes 1A	-0.829752	7.51155	-11.7146	1.09735e-11	1.37089e-10	16.4317
55944	Eif3d	eukaryotic translation initiation factor 3, subunit D	-1.21246	7.49051	-11.7249	1.09943e-11	1.37245e-10	16.4407
94178	Mcoln1	mucolipin 1	0.928525	5.15957	11.7079	1.11094e-11	1.38369e-10	16.5473
109361	D730005E14Rik	RIKEN cDNA D730005E14 gene	4.21487	1.29192	11.7077	1.11131e-11	1.38369e-10	16.4057
19045	Ppp1ca	protein phosphatase 1 catalytic subunit alpha	-1.11261	8.70228	-11.7079	1.11151e-11	1.38369e-10	16.4105
19025	Ctsa	cathepsin A	1.52047	7.59632	11.732	1.11182e-11	1.38369e-10	16.4222
68567	Cgref1	cell growth regulator with EF hand domain 1	-4.50138	0.19397	-11.7307	1.11447e-11	1.38594e-10	16.7585
170930	Sumo2	small ubiquitin-like modifier 2	-1.39508	6.63417	-11.7298	1.11621e-11	1.38705e-10	16.4418
72325	Vps9d1	VPS9 domain containing 1	1.50058	4.35493	11.7043	1.12047e-11	1.39128e-10	16.6139
225372	Apbb3	amyloid beta (A4) precursor protein-binding, family B, member 3	1.84923	3.73302	11.7007	1.13804e-11	1.41203e-10	16.7067
16532	Kcnu1	potassium channel, subfamily U, member 1	-5.68289	-0.494487	-11.7162	1.14429e-11	1.41871e-10	16.2074
252875	Mios	meiosis regulator for oocyte development	-1.32691	4.87822	-11.6894	1.14907e-11	1.42356e-10	16.5419
239839	Ccdc14	coiled-coil domain containing 14	-1.36187	3.41929	-11.6795	1.1701e-11	1.44852e-10	16.638
209354	Eif2b1	eukaryotic translation initiation factor 2B, subunit 1 (alpha)	-1.16697	6.04474	-11.678	1.17337e-11	1.45147e-10	16.4244
110454	Ly6a	lymphocyte antigen 6 complex, locus A	2.48579	7.65749	11.7015	1.17525e-11	1.4527e-10	16.3754
66878	Riok3	RIO kinase 3	1.11601	6.96089	11.6755	1.17879e-11	1.45598e-10	16.3883
57279	Slc25a20	solute carrier family 25 (mitochondrial carnitine/acylcarnitine translocase), member 20	1.16439	4.53695	11.6745	1.18086e-11	1.45743e-10	16.5375
72709	C1qtnf6	C1q and tumor necrosis factor related protein 6	6.44582	0.170939	11.6969	1.18513e-11	1.46161e-10	16.2563
20191	Ryr2	ryanodine receptor 2, cardiac	-7.07715	-2.81003	-11.6811	1.18743e-11	1.46334e-10	15.104
99334	Zscan29	zinc finger SCAN domains 29	1.0373	4.83835	11.6634	1.20522e-11	1.48414e-10	16.5169
19184	Psmc5	protease (prosome, macropain) 26S subunit, ATPase 5	-1.02574	7.39641	-11.6568	1.21975e-11	1.50091e-10	16.3292
66420	Polr2e	polymerase (RNA) II (DNA directed) polypeptide E	-1.39004	6.4554	-11.6787	1.22531e-11	1.50662e-10	16.3506
74008	Arsg	arylsulfatase G	4.22421	1.23235	11.6754	1.2326e-11	1.51444e-10	16.5865
217684	Susd6	sushi domain containing 6	1.81243	5.52727	11.6732	1.23771e-11	1.51958e-10	16.3971
170750	Xpnpep1	X-prolyl aminopeptidase (aminopeptidase P) 1, soluble	-0.820372	7.19196	-11.6347	1.27022e-11	1.55833e-10	16.2943
22259	Nr1h3	nuclear receptor subfamily 1, group H, member 3	3.74191	-0.288742	11.6544	1.28091e-11	1.57027e-10	16.631
21950	Tnfsf9	tumor necrosis factor (ligand) superfamily, member 9	1.97968	4.09441	11.6524	1.28556e-11	1.57478e-10	16.4962
229706	Slc6a17	solute carrier family 6 (neurotransmitter transporter), member 17	-3.64662	2.90216	-11.6512	1.28838e-11	1.57675e-10	16.61
80914	Uck2	uridine-cytidine kinase 2	-1.53658	6.64211	-11.6509	1.28909e-11	1.57675e-10	16.3061
72508	Rps6kb1	ribosomal protein S6 kinase, polypeptide 1	-0.901806	6.20414	-11.624	1.29564e-11	1.58359e-10	16.2979
72507	Dzip1l	DAZ interacting protein 1-like	-1.69335	5.57407	-11.6471	1.29817e-11	1.58549e-10	16.3633
271842	Rpusd2	RNA pseudouridylate synthase domain containing 2	-1.57277	3.29649	-11.6218	1.30079e-11	1.5875e-10	16.6192
14991	H2-M3	histocompatibility 2, M region locus 3	2.58212	3.24162	11.636	1.32478e-11	1.61558e-10	16.6077
18451	P4ha1	procollagen-proline, 2-oxoglutarate 4-dioxygenase (proline 4-hydroxylase), alpha 1 polypeptide	1.62705	5.47349	11.6332	1.33148e-11	1.62181e-10	16.2764
11513	Adcy7	adenylate cyclase 7	2.65696	5.29426	11.6331	1.33187e-11	1.62181e-10	16.3504
13392	Dlx2	distal-less homeobox 2	-6.47636	-2.0464	-11.6052	1.34258e-11	1.63351e-10	15.1512
213541	Ythdf2	YTH N6-methyladenosine RNA binding protein 2	-0.8557	6.58877	-11.6042	1.34347e-11	1.63351e-10	16.2568
17476	Mpeg1	macrophage expressed gene 1	9.87517	1.58215	11.6279	1.34453e-11	1.63358e-10	16.3986
17686	Msh3	mutS homolog 3	-0.941405	4.51971	-11.6018	1.34947e-11	1.63838e-10	16.3828
66131	Tipin	timeless interacting protein	-1.95427	5.90849	-11.6242	1.3536e-11	1.64142e-10	16.2984
101739	Psip1	PC4 and SFRS1 interacting protein 1	-0.967872	6.72253	-11.6	1.35398e-11	1.64142e-10	16.2362
330256	Gm20559	predicted gene, 20559	4.89735	-0.329413	11.6144	1.36739e-11	1.65644e-10	16.2145
30935	Tor3a	torsin family 3, member A	1.72035	4.39858	11.6065	1.38181e-11	1.67267e-10	16.4399
69938	Scrn1	secernin 1	-3.81915	1.50169	-11.6118	1.38493e-11	1.67521e-10	16.5607
22318	Vamp2	vesicle-associated membrane protein 2	1.43545	5.25091	11.595	1.3892e-11	1.67914e-10	16.3455
19376	Rab34	RAB34, member RAS oncogene family	-1.69807	6.39228	-11.608	1.39446e-11	1.68425e-10	16.2298
320019	Ptgs2os	prostaglandin-endoperoxide synthase 2, opposite strand	-3.40513	0.959924	-11.5831	1.3968e-11	1.68583e-10	16.4103
231855	Ap5z1	adaptor-related protein complex 5, zeta 1 subunit	1.81427	4.38759	11.6057	1.40046e-11	1.68901e-10	16.4227
74196	Ttc27	tetratricopeptide repeat domain 27	-1.16701	5.78572	-11.5797	1.4057e-11	1.69408e-10	16.2438
18102	Nme1	NME/NM23 nucleoside diphosphate kinase 1	-1.94905	6.57558	-11.6025	1.40854e-11	1.69625e-10	16.2185
55925	Syt8	synaptotagmin VIII	3.60051	3.41437	11.5972	1.42244e-11	1.7111e-10	16.4804
74015	Fcho1	FCH domain only 1	2.47702	3.3973	11.597	1.42296e-11	1.7111e-10	16.5198
381802	Tsen2	tRNA splicing endonuclease subunit 2	-1.15725	3.43197	-11.5683	1.43531e-11	1.72469e-10	16.4369
14030	Ewsr1	Ewing sarcoma breakpoint region 1	-0.699611	8.41086	-11.5665	1.44031e-11	1.72943e-10	16.1469
12111	Bgn	biglycan	7.1555	1.63867	11.5885	1.44536e-11	1.73422e-10	16.561
12585	Cdr2	cerebellar degeneration-related 2	-1.3988	4.72051	-11.5642	1.46861e-11	1.76082e-10	16.2771
75339	Mphosph8	M-phase phosphoprotein 8	-0.873361	5.14289	-11.5532	1.47606e-11	1.76847e-10	16.239
57813	Tk2	thymidine kinase 2, mitochondrial	0.921785	4.45374	11.5482	1.48963e-11	1.78341e-10	16.3142
11757	Prdx3	peroxiredoxin 3	-1.52478	6.33695	-11.5687	1.49887e-11	1.79317e-10	16.1425
101437	Dhx32	DEAH (Asp-Glu-Ala-His) box polypeptide 32	-0.985698	6.39296	-11.5429	1.50442e-11	1.79849e-10	16.1577
69534	Avpi1	arginine vasopressin-induced 1	-2.10046	5.89816	-11.5633	1.51375e-11	1.80833e-10	16.1803
237911	Brip1	BRCA1 interacting protein C-terminal helicase 1	-1.71482	4.36024	-11.557	1.52285e-11	1.81787e-10	16.3217
65970	Lima1	LIM domain and actin binding 1	1.2598	6.37035	11.5474	1.52535e-11	1.81953e-10	16.1384
20525	Slc2a1	solute carrier family 2 (facilitated glucose transporter), member 1	1.40441	7.40935	11.5567	1.53246e-11	1.82668e-10	16.1086
226421	Rab7b	RAB7B, member RAS oncogene family	1.9128	3.78993	11.5492	1.55361e-11	1.85055e-10	16.3336
22134	Tgoln1	trans-golgi network protein	1.16181	7.41018	11.5314	1.55681e-11	1.85301e-10	16.0864
277396	Klhl23	kelch-like 23	-3.2027	1.70617	-11.5466	1.5612e-11	1.85688e-10	16.4819
208836	Fanci	Fanconi anemia, complementation group I	-1.4733	3.94019	-11.5166	1.57929e-11	1.87704e-10	16.2899
75717	Cul5	cullin 5	-0.890916	6.05704	-11.516	1.58106e-11	1.87778e-10	16.1136
59013	Hnrnph1	heterogeneous nuclear ribonucleoprotein H1	-0.948384	9.20059	-11.512	1.59276e-11	1.89031e-10	16.0412
14793	Cdca3	cell division cycle associated 3	-1.42486	6.02222	-11.5337	1.59862e-11	1.89588e-10	16.1048
19352	Rabggtb	Rab geranylgeranyl transferase, b subunit	-1.26525	7.0888	-11.5286	1.60347e-11	1.90027e-10	16.0582
212070	Clrn3	clarin 3	-6.61992	-3.31008	-11.5252	1.61116e-11	1.908e-10	15.3078
21355	Tap2	transporter 2, ATP-binding cassette, sub-family B (MDR/TAP)	7.97382	0.802033	11.5272	1.61796e-11	1.91467e-10	15.4759
18824	Plp2	proteolipid protein 2	-1.06406	7.71089	-11.4995	1.6301e-11	1.92682e-10	16.0269
12464	Cct4	chaperonin containing Tcp1, subunit 4 (delta)	-1.27551	8.83985	-11.523	1.63058e-11	1.92682e-10	16.0225
224697	Adamts10	a disintegrin-like and metallopeptidase (reprolysin type) with thrombospondin type 1 motif, 10	1.55546	4.43504	11.5154	1.64295e-11	1.94003e-10	16.1876
66949	Trim59	tripartite motif-containing 59	-1.35077	7.26469	-11.5175	1.64694e-11	1.94334e-10	16.0346
11966	Atp6v1b2	ATPase, H+ transporting, lysosomal V1 subunit B2	1.33157	6.39311	11.5019	1.69267e-11	1.99586e-10	16.0309
56399	Akap8	A kinase (PRKA) anchor protein 8	-0.795717	7.3841	-11.4784	1.69507e-11	1.99726e-10	15.9909
50529	Mrps7	mitchondrial ribosomal protein S7	-1.17571	5.98446	-11.4772	1.6998e-11	2.00013e-10	16.0359
100201	Tmem64	transmembrane protein 64	-2.41026	3.08177	-11.5004	1.69996e-11	2.00013e-10	16.2053
216150	Cdc34	cell division cycle 34	-1.4312	6.24579	-11.4994	1.70289e-11	2.00214e-10	16.0375
67800	Dgat2	diacylglycerol O-acyltransferase 2	1.48549	4.27648	11.4844	1.71375e-11	2.01348e-10	16.1447
11767	Ap1m1	adaptor-related protein complex AP-1, mu subunit 1	-0.841594	6.19163	-11.4681	1.72761e-11	2.0283e-10	15.998
244416	Ppp1r3b	protein phosphatase 1, regulatory subunit 3B	6.80314	2.14601	11.4886	1.73731e-11	2.03823e-10	16.1756
105245	Txndc5	thioredoxin domain containing 5	-0.852071	7.8096	-11.4586	1.75841e-11	2.06151e-10	15.9486
19384	Ran	RAN, member RAS oncogene family	-1.39616	9.33663	-11.4802	1.76438e-11	2.06702e-10	15.941
74249	Lrrc2	leucine rich repeat containing 2	5.85329	0.554359	11.4708	1.79542e-11	2.10189e-10	15.6613
68277	2310057M21Rik	RIKEN cDNA 2310057M21 gene	-1.16459	3.50608	-11.4468	1.79726e-11	2.10253e-10	16.2311
72318	Cyth4	cytohesin 4	5.9181	4.15003	11.4631	1.82109e-11	2.12814e-10	16.3121
229285	Spg20	spastic paraplegia 20, spartin (Troyer syndrome) homolog (human)	-0.846811	5.69639	-11.4396	1.82174e-11	2.12814e-10	15.993
226539	Dars2	aspartyl-tRNA synthetase 2 (mitochondrial)	-1.01405	4.5707	-11.4369	1.83071e-11	2.13709e-10	16.065
70620	Ube2v2	ubiquitin-conjugating enzyme E2 variant 2	-1.57498	4.52625	-11.452	1.85914e-11	2.16874e-10	16.0454
67553	Gstcd	glutathione S-transferase, C-terminal domain containing	-1.21028	5.17202	-11.4237	1.87621e-11	2.18709e-10	16.0117
16922	Phyh	phytanoyl-CoA hydroxylase	2.4821	2.36112	11.423	1.88036e-11	2.19036e-10	16.2997
108902	B4gat1	beta-1,4-glucuronyltransferase 1	-1.08608	4.28021	-11.4197	1.89041e-11	2.20051e-10	16.0253
72123	Ccdc71l	coiled-coil domain containing 71 like	2.61977	3.98631	11.4423	1.89286e-11	2.20179e-10	16.1717
70266	Kyat1	kynurenine aminotransferase 1	2.99347	2.30486	11.427	1.89671e-11	2.20471e-10	16.28
26384	Gnpda1	glucosamine-6-phosphate deaminase 1	2.23016	4.78379	11.4405	1.89893e-11	2.20474e-10	16.1105
224116	Muc20	mucin 20	10.275	-0.809855	11.4404	1.89943e-11	2.20474e-10	14.5098
19063	Ppt1	palmitoyl-protein thioesterase 1	1.34012	6.31641	11.421	1.96882e-11	2.28366e-10	15.883
66656	Eef1d	eukaryotic translation elongation factor 1 delta (guanine nucleotide exchange protein)	-1.34942	8.29751	-11.4169	1.98411e-11	2.29906e-10	15.824
21665	Tdg	thymine DNA glycosylase	-1.06154	5.1913	-11.393	1.9865e-11	2.29906e-10	15.9529
69089	Oxa1l	oxidase assembly 1-like	-1.06115	5.07496	-11.393	1.98677e-11	2.29906e-10	15.9316
18174	Slc11a2	solute carrier family 11 (proton-coupled divalent metal ion transporters), member 2	-0.894226	6.08998	-11.3927	1.98771e-11	2.29906e-10	15.8825
105377	Slf1	SMC5-SMC6 complex localization factor 1	-1.28063	4.58395	-11.389	2.00147e-11	2.31334e-10	15.9996
12051	Bcl3	B cell leukemia/lymphoma 3	2.19571	3.63388	11.4064	2.02297e-11	2.33655e-10	16.1291
104111	Adcy3	adenylate cyclase 3	3.21368	2.7674	11.3985	2.03078e-11	2.34391e-10	16.2049
80915	Dusp12	dual specificity phosphatase 12	-1.43466	3.86298	-11.3793	2.03789e-11	2.35046e-10	16.0056
19062	Inpp5k	inositol polyphosphate 5-phosphatase K	1.13345	4.54827	11.3671	2.08492e-11	2.40149e-10	15.96
26410	Map3k8	mitogen-activated protein kinase kinase kinase 8	4.11414	2.53487	11.3901	2.08507e-11	2.40149e-10	16.1799
70683	Utp20	UTP20 small subunit processome component	-1.58189	6.85001	-11.3873	2.09621e-11	2.41262e-10	15.7992
74150	Slc35f5	solute carrier family 35, member F5	1.1414	5.35531	11.363	2.10091e-11	2.41634e-10	15.8773
100043468	Zfp955b	zinc finger protein 955B	-1.25758	4.49027	-11.3535	2.1386e-11	2.45665e-10	15.9608
18590	Pdgfa	platelet derived growth factor, alpha	2.3329	5.6059	11.3764	2.13896e-11	2.45665e-10	15.8777
107607	Nod1	nucleotide-binding oligomerization domain containing 1	7.28405	0.215733	11.3756	2.14212e-11	2.45726e-10	15.875
234396	Ankle1	ankyrin repeat and LEM domain containing 1	-1.6116	3.38843	-11.3606	2.14249e-11	2.45726e-10	15.996
67412	Soga3	SOGA family member 3	-7.35535	-3.31737	-11.3715	2.145e-11	2.45842e-10	14.6427
65961	Utp3	UTP3 small subunit processome component	-1.17618	6.53483	-11.3574	2.15132e-11	2.46394e-10	15.7747
277328	Trpa1	transient receptor potential cation channel, subfamily A, member 1	-5.79813	-3.88301	-11.3495	2.15453e-11	2.46589e-10	14.4598
21770	Ppp2r5d	protein phosphatase 2, regulatory subunit B', delta	-0.972152	7.21791	-11.3471	2.16427e-11	2.47531e-10	15.7459
226182	Taf5	TATA-box binding protein associated factor 5	-1.28058	3.95892	-11.3458	2.16955e-11	2.47962e-10	15.9682
69956	Ptcd3	pentatricopeptide repeat domain 3	-1.22761	6.49112	-11.3485	2.20587e-11	2.51937e-10	15.7543
54140	Avpr1a	arginine vasopressin receptor 1A	7.21032	-5.14141	11.334	2.21779e-11	2.53122e-10	13.2161
240726	Slco5a1	solute carrier organic anion transporter family, member 5A1	-3.4493	0.237264	-11.3545	2.22802e-11	2.54092e-10	16.1183
14727	Lilr4b	leukocyte immunoglobulin-like receptor, subfamily B, member 4B	6.98632	1.4402	11.3542	2.22939e-11	2.54092e-10	16.1222
277463	Gpr107	G protein-coupled receptor 107	0.8989	6.36426	11.3303	2.23324e-11	2.54353e-10	15.7638
69035	Zdhhc3	zinc finger, DHHC domain containing 3	-0.828817	6.04958	-11.3264	2.24981e-11	2.56062e-10	15.7432
73720	Cst6	cystatin E/M	-4.81781	1.86571	-11.3455	2.2657e-11	2.57692e-10	15.9712
67429	Nudcd1	NudC domain containing 1	-1.26554	6.0844	-11.3299	2.29168e-11	2.60465e-10	15.7338
20901	Strap	serine/threonine kinase receptor associated protein	-1.15382	8.15502	-11.3228	2.31253e-11	2.62653e-10	15.6666
66570	Cenpm	centromere protein M	-1.45684	3.18732	-11.3101	2.31939e-11	2.6325e-10	15.9514
67703	Kirrel3	kirre like nephrin family adhesion molecule 3	-3.09944	0.0553008	-11.3209	2.34851e-11	2.6637e-10	16.0726
622320	Kctd21	potassium channel tetramerisation domain containing 21	2.17103	1.5075	11.2874	2.42024e-11	2.74316e-10	16.0416
100608	Noc4l	NOC4 like	-1.05134	6.42823	-11.2855	2.42898e-11	2.75117e-10	15.6593
54367	Zfp326	zinc finger protein 326	-0.749584	6.07722	-11.2842	2.43498e-11	2.75605e-10	15.6697
209334	Gen1	GEN1, Holliday junction 5' flap endonuclease	-1.92438	3.51094	-11.2995	2.43913e-11	2.75884e-10	15.9425
192187	Stab1	stabilin 1	10.519	2.98088	11.3056	2.44104e-11	2.7591e-10	15.776
15040	H2-T23	histocompatibility 2, T region locus 23	2.73758	2.78618	11.3045	2.44593e-11	2.76272e-10	15.8672
11477	Acvr1	activin A receptor, type 1	-0.99858	6.74351	-11.2785	2.46075e-11	2.77755e-10	15.6445
83490	Pik3ap1	phosphoinositide-3-kinase adaptor protein 1	4.89592	2.59938	11.3001	2.46581e-11	2.78134e-10	16.0252
18973	Pole	polymerase (DNA directed), epsilon	-1.71435	6.54546	-11.2919	2.50416e-11	2.82093e-10	15.645
107375	Slc25a45	solute carrier family 25, member 45	1.79543	3.867	11.2889	2.50435e-11	2.82093e-10	15.8613
52202	Rbm34	RNA binding motif protein 34	-0.998038	5.8575	-11.2686	2.5071e-11	2.82208e-10	15.6571
66637	Tsen15	tRNA splicing endonuclease subunit 15	-1.86514	4.11866	-11.2884	2.52068e-11	2.83542e-10	15.8278
212390	Klhl32	kelch-like 32	-6.91313	-1.32044	-11.2872	2.52621e-11	2.83969e-10	15.1538
231042	Nupl2	nucleoporin like 2	-1.17149	3.56776	-11.2599	2.54826e-11	2.86251e-10	15.8997
18569	Pdcd4	programmed cell death 4	1.40877	4.0343	11.2541	2.57639e-11	2.89102e-10	15.8158
211936	Ccdc73	coiled-coil domain containing 73	1.80937	2.06733	11.2539	2.57717e-11	2.89102e-10	15.9857
69656	Pir	pirin	-3.25131	2.60309	-11.276	2.57984e-11	2.89204e-10	15.9812
664968	Tmem238	transmembrane protein 238	-2.55731	3.17069	-11.2749	2.58511e-11	2.89568e-10	15.9286
16906	Lmnb1	lamin B1	-1.09287	7.4636	-11.2531	2.5867e-11	2.89568e-10	15.5565
225870	Rin1	Ras and Rab interactor 1	-1.48709	6.87289	-11.2742	2.58839e-11	2.89568e-10	15.5816
226043	Cbwd1	COBW domain containing 1	-1.51321	5.20714	-11.2735	2.59178e-11	2.89748e-10	15.6824
14284	Fosl2	fos-like antigen 2	2.09134	7.15447	11.2721	2.59874e-11	2.90328e-10	15.5793
76952	Nt5c2	5'-nucleotidase, cytosolic II	-0.664535	6.89628	-11.2396	2.64748e-11	2.95572e-10	15.548
13113	Cyp3a13	cytochrome P450, family 3, subfamily a, polypeptide 13	2.66242	3.90513	11.2602	2.65728e-11	2.96465e-10	15.9019
67014	Riox2	ribosomal oxygenase 2	-1.13656	4.48966	-11.235	2.67044e-11	2.97729e-10	15.6823
108907	Nusap1	nucleolar and spindle associated protein 1	-1.32959	6.24943	-11.2541	2.67271e-11	2.9778e-10	15.5877
15170	Ptpn6	protein tyrosine phosphatase, non-receptor type 6	3.2594	4.09427	11.2483	2.71725e-11	3.02338e-10	15.7125
109270	Prr5	proline rich 5 (renal)	-1.79783	4.75855	-11.2483	2.71732e-11	3.02338e-10	15.73
19366	Rad54l	RAD54 like (S. cerevisiae)	-1.43362	4.11907	-11.2214	2.73983e-11	3.04636e-10	15.7202
68276	Toe1	target of EGR1, member 1 (nuclear)	-1.14133	4.58392	-11.2181	2.75706e-11	3.06345e-10	15.6856
216456	Gls2	glutaminase 2 (liver, mitochondrial)	-2.02972	3.68716	-11.2359	2.76097e-11	3.0657e-10	15.8355
18572	Pdcd11	programmed cell death 11	-1.49809	7.17162	-11.2375	2.77282e-11	3.07677e-10	15.4997
100503380	Snhg4	small nucleolar RNA host gene 4	-1.84568	4.9666	-11.2365	2.77777e-11	3.08018e-10	15.6287
244144	Usp35	ubiquitin specific peptidase 35	2.60522	2.56782	11.2317	2.78046e-11	3.08108e-10	15.9107
104215	Rhoq	ras homolog family member Q	1.58035	5.94564	11.2314	2.80446e-11	3.10557e-10	15.5708
69482	Nup35	nucleoporin 35	-1.64426	5.41546	-11.2173	2.87971e-11	3.18674e-10	15.5531
18391	Sigmar1	sigma non-opioid intracellular receptor 1	-1.03631	6.12034	-11.1936	2.88691e-11	3.18866e-10	15.479
78394	Ddx52	DExD box helicase 52	-1.26018	6.40391	-11.2112	2.88847e-11	3.18866e-10	15.4848
68614	Letmd1	LETM1 domain containing 1	0.961084	4.74594	11.1933	2.88855e-11	3.18866e-10	15.6457
14113	Fbl	fibrillarin	-1.39222	7.12597	-11.2156	2.88923e-11	3.18866e-10	15.4583
56452	Orc6	origin recognition complex, subunit 6	-1.93418	6.75303	-11.2142	2.89654e-11	3.19438e-10	15.4755
238076	Kcns3	potassium voltage-gated channel, delayed-rectifier, subfamily S, member 3	-5.63051	-2.30173	-11.2139	2.89831e-11	3.19438e-10	15.2581
243300	Nyap1	neuronal tyrosine-phosphorylated phosphoinositide 3-kinase adaptor 1	3.11796	4.00807	11.2105	2.91696e-11	3.21278e-10	15.7612
64540	Tspan4	tetraspanin 4	-1.21073	6.09423	-11.1984	2.92261e-11	3.21683e-10	15.4696
14567	Gdi1	guanosine diphosphate (GDP) dissociation inhibitor 1	0.774345	7.00055	11.1825	2.94828e-11	3.24291e-10	15.4361
218506	Mrps27	mitochondrial ribosomal protein S27	-1.10616	4.92244	-11.1821	2.95034e-11	3.24299e-10	15.5701
20305	Ccl6	chemokine (C-C motif) ligand 6	9.13175	2.45881	11.1998	2.97615e-11	3.26917e-10	15.8437
94062	Mrpl3	mitochondrial ribosomal protein L3	-1.26875	5.83966	-11.1893	2.99786e-11	3.29081e-10	15.4641
241627	Wdr76	WD repeat domain 76	-1.04695	5.01324	-11.1726	3.00381e-11	3.29514e-10	15.5705
19652	Rbm3	RNA binding motif (RNP1, RRM) protein 3	-1.92017	8.28738	-11.1918	3.02105e-11	3.31183e-10	15.3953
100529075	Snord100	small nucleolar RNA, C/D box 100	-1.99674	1.72825	-11.163	3.059e-11	3.35119e-10	15.8154
68816	Ppil1	peptidylprolyl isomerase (cyclophilin)-like 1	-1.38676	6.69799	-11.1828	3.07286e-11	3.36412e-10	15.4162
64657	Mrps10	mitochondrial ribosomal protein S10	-1.57451	5.40459	-11.1803	3.08732e-11	3.37769e-10	15.4876
208177	Phldb2	pleckstrin homology like domain, family B, member 2	-1.43658	7.81681	-11.1764	3.10987e-11	3.4001e-10	15.3666
19017	Ppargc1a	peroxisome proliferative activated receptor, gamma, coactivator 1 alpha	-6.98833	-2.18503	-11.1649	3.17812e-11	3.47239e-10	14.9062
76408	Abcc3	ATP-binding cassette, sub-family C (CFTR/MRP), member 3	2.3119	6.45471	11.1623	3.19371e-11	3.48711e-10	15.3684
106512	Gpsm3	G-protein signalling modulator 3 (AGS3-like, C. elegans)	5.48969	1.35771	11.162	3.19587e-11	3.48714e-10	15.7091
214359	Tmem51	transmembrane protein 51	2.96685	3.5251	11.1593	3.21166e-11	3.50203e-10	15.7153
67893	Tmem86a	transmembrane protein 86A	3.10702	3.23271	11.1542	3.2427e-11	3.53352e-10	15.6995
52705	Krr1	KRR1, small subunit (SSU) processome component, homolog (yeast)	-1.16681	5.62568	-11.1295	3.25894e-11	3.54886e-10	15.3939
217356	Tmc8	transmembrane channel-like gene family 8	2.81613	1.50554	11.1035	3.43942e-11	3.74291e-10	15.6961
11828	Aqp3	aquaporin 3	4.52072	3.62621	11.1227	3.44179e-11	3.74301e-10	15.6791
27267	Cars	cysteinyl-tRNA synthetase	-0.995587	7.05149	-11.0994	3.45018e-11	3.74963e-10	15.2865
19261	Sirpa	signal-regulatory protein alpha	6.59473	2.58109	11.1195	3.4624e-11	3.75844e-10	15.6677
11800	Api5	apoptosis inhibitor 5	-0.841632	8.11157	-11.0975	3.46287e-11	3.75844e-10	15.252
27219	Sgk2	serum/glucocorticoid regulated kinase 2	3.32006	3.709	11.113	3.50525e-11	3.80081e-10	15.6292
66125	Sf3b5	splicing factor 3b, subunit 5	-1.68124	4.96131	-11.1128	3.50655e-11	3.80081e-10	15.3725
17299	Mettl1	methyltransferase like 1	-1.47195	3.59204	-11.0894	3.51623e-11	3.80832e-10	15.5217
69309	Slc16a13	solute carrier family 16 (monocarboxylic acid transporters), member 13	-1.30398	4.79407	-11.0897	3.51813e-11	3.80832e-10	15.3932
217946	Cdca7l	cell division cycle associated 7 like	-1.21057	4.0452	-11.0862	3.53805e-11	3.82735e-10	15.4352
56441	Naa80	N(alpha)-acetyltransferase 80, NatH catalytic subunit	1.55949	3.55379	11.0842	3.55161e-11	3.83948e-10	15.5698
66078	Tsen34	tRNA splicing endonuclease subunit 34	-1.25823	5.71875	-11.094	3.56016e-11	3.84619e-10	15.3008
53857	Tuba8	tubulin, alpha 8	3.85991	1.80584	11.1025	3.57538e-11	3.86008e-10	15.6102
70945	Mmrn1	multimerin 1	6.37509	-5.38429	11.08	3.57968e-11	3.86008e-10	12.821
216821	Tmem11	transmembrane protein 11	-1.21584	5.49532	-11.0803	3.58009e-11	3.86008e-10	15.325
228889	Ddx27	DEAD box helicase 27	-0.900256	7.57786	-11.0792	3.58496e-11	3.8616e-10	15.2262
319278	Shfl	shiftless antiviral inhibitor of ribosomal frameshifting	8.58926	-1.74342	11.0857	3.58621e-11	3.8616e-10	12.9667
67887	Saraf	store-operated calcium entry-associated regulatory factor	1.09101	6.89903	11.0774	3.59782e-11	3.87156e-10	15.2485
12182	Bst1	bone marrow stromal cell antigen 1	10.6421	-0.764996	11.0978	3.60769e-11	3.87962e-10	14.2394
234911	Mmp27	matrix metallopeptidase 27	5.64497	-5.45475	11.0742	3.61927e-11	3.88953e-10	12.7298
106581	Fam234a	family with sequence similarity 234, member A	1.16434	5.78879	11.0727	3.62971e-11	3.89819e-10	15.2936
100043508	Ptges3-ps	prostaglandin E synthase 3, pseudogene	-1.45116	5.09664	-11.0918	3.63826e-11	3.90481e-10	15.3449
229521	Syt11	synaptotagmin XI	1.48406	3.5369	11.0654	3.68069e-11	3.94776e-10	15.574
74467	Pus10	pseudouridylate synthase 10	-0.828795	5.8695	-11.0639	3.69065e-11	3.95585e-10	15.2612
223664	Lrrc14	leucine rich repeat containing 14	-0.991805	4.80354	-11.0581	3.73179e-11	3.99733e-10	15.3437
15289	Hmgb1	high mobility group box 1	-1.09962	6.76419	-11.0613	3.73906e-11	4.0025e-10	15.1927
23825	Banf1	BAF nuclear assembly factor 1	-1.72434	7.54501	-11.0768	3.75403e-11	4.0159e-10	15.1791
78833	Gins3	GINS complex subunit 3 (Psf3 homolog)	-1.30636	3.72431	-11.0541	3.7604e-11	4.0201e-10	15.453
67236	Cinp	cyclin-dependent kinase 2 interacting protein	-1.37031	5.10177	-11.0691	3.77226e-11	4.03014e-10	15.2907
104732	Tedc1	tubulin epsilon and delta complex 1	-1.10361	5.1244	-11.052	3.77515e-11	4.0306e-10	15.3167
24014	Rnasel	ribonuclease L (2', 5'-oligoisoadenylate synthetase-dependent)	3.42386	3.97898	11.0697	3.80477e-11	4.05957e-10	15.4817
18150	Npm3	nucleoplasmin 3	-1.92014	6.61819	-11.0688	3.81091e-11	4.06349e-10	15.187
66622	Ubr7	ubiquitin protein ligase E3 component n-recognin 7 (putative)	-0.919578	5.27228	-11.0381	3.87661e-11	4.12863e-10	15.2472
69106	Stoml1	stomatin-like 1	1.37183	3.62744	11.038	3.87705e-11	4.12863e-10	15.4679
14600	Ghr	growth hormone receptor	-2.61994	6.41315	-11.0569	3.89799e-11	4.14823e-10	15.171
54366	Ctnnal1	catenin (cadherin associated protein), alpha-like 1	-1.1599	5.46887	-11.0316	3.92488e-11	4.17414e-10	15.2557
15356	Hmgcl	3-hydroxy-3-methylglutaryl-Coenzyme A lyase	1.75372	3.80894	11.0459	3.95315e-11	4.20106e-10	15.4021
27354	Nbn	nibrin	-1.15976	4.76333	-11.0276	3.95532e-11	4.20106e-10	15.265
212980	Slc45a3	solute carrier family 45, member 3	3.03968	3.15912	11.044	3.995e-11	4.24045e-10	15.5479
22687	Zpr1	ZPR1 zinc finger	-0.880218	6.15077	-11.0216	4.0004e-11	4.2434e-10	15.155
170741	Pilrb1	paired immunoglobin-like type 2 receptor beta 1	2.35748	2.14406	11.0429	4.00296e-11	4.2434e-10	15.4849
22418	Wnt5a	wingless-type MMTV integration site family, member 5A	-2.13316	1.99527	-11.0293	4.00628e-11	4.24416e-10	15.513
211556	Ap1ar	adaptor-related protein complex 1 associated regulatory protein	-0.840343	6.27177	-11.0159	4.04447e-11	4.28186e-10	15.1283
17463	Psmd7	proteasome (prosome, macropain) 26S subunit, non-ATPase, 7	-1.20055	8.03372	-11.0333	4.05469e-11	4.28991e-10	15.0954
12738	Cldn2	claudin 2	3.46174	1.56292	11.0304	4.09884e-11	4.33381e-10	15.418
78697	Pus7	pseudouridylate synthase 7	-0.952004	6.40876	-11.0061	4.12013e-11	4.35352e-10	15.1198
260299	Cadm4	cell adhesion molecule 4	2.80399	3.33325	11.0266	4.12916e-11	4.36025e-10	15.5159
70454	Cenpl	centromere protein L	-1.35544	4.45939	-11.0021	4.15209e-11	4.38066e-10	15.2739
16975	Lrp8	low density lipoprotein receptor-related protein 8, apolipoprotein e receptor	-1.65168	6.27236	-11.0234	4.15384e-11	4.38066e-10	15.1415
15547	Trmt2a	TRM2 tRNA methyltransferase 2A	-0.828405	5.91897	-11.0001	4.16761e-11	4.39235e-10	15.1158
67979	Atad1	ATPase family, AAA domain containing 1	-1.33857	7.44797	-11.0161	4.21173e-11	4.436e-10	15.0605
11796	Birc3	baculoviral IAP repeat-containing 3	3.18322	3.59649	10.9998	4.34506e-11	4.57313e-10	15.3836
81004	Tbl1xr1	transducin (beta)-like 1X-linked receptor 1	0.919662	5.98344	10.9777	4.35025e-11	4.57313e-10	15.0811
50887	Hmgn5	high-mobility group nucleosome binding domain 5	-2.07501	3.67187	-10.9991	4.35059e-11	4.57313e-10	15.1744
52715	Ccdc43	coiled-coil domain containing 43	-0.924761	5.62615	-10.9773	4.3531e-11	4.57313e-10	15.1011
19060	Ppp5c	protein phosphatase 5, catalytic subunit	-1.36422	5.7138	-10.9983	4.35703e-11	4.57433e-10	15.0992
20351	Sema4a	sema domain, immunoglobulin domain (Ig), transmembrane domain (TM) and short cytoplasmic domain, (semaphorin) 4A	9.37186	0.187589	10.9891	4.43391e-11	4.65205e-10	14.8529
71709	Syde1	synapse defective 1, Rho GTPase, homolog 1 (C. elegans)	-1.85105	4.92438	-10.987	4.45233e-11	4.66839e-10	15.1434
80909	Castor2	cytosolic arginine sensor for mTORC1 subunit 2	3.23163	3.79453	10.9846	4.47269e-11	4.68674e-10	15.391
68051	Nutf2	nuclear transport factor 2	-1.29748	5.47708	-10.9715	4.49378e-11	4.70583e-10	15.0957
110639	Prps2	phosphoribosyl pyrophosphate synthetase 2	-1.27217	5.23761	-10.9741	4.52921e-11	4.73989e-10	15.0453
19691	Recql	RecQ protein-like	-0.871799	4.71011	-10.9542	4.55008e-11	4.7587e-10	15.1106
238393	Serpina3f	serine (or cysteine) peptidase inhibitor, clade A, member 3F	8.34099	-4.9975	10.9533	4.59502e-11	4.80263e-10	12.7881
215387	Ncaph	non-SMC condensin I complex, subunit H	-1.00954	6.08717	-10.9357	4.71387e-11	4.92371e-10	15.011
70235	Poc1a	POC1 centriolar protein A	-1.50201	3.62606	-10.9332	4.73676e-11	4.94447e-10	15.2386
68837	Foxk2	forkhead box K2	-0.87843	6.61775	-10.9316	4.75155e-11	4.95448e-10	14.954
15945	Cxcl10	chemokine (C-X-C motif) ligand 10	6.54966	1.1276	10.9527	4.7524e-11	4.95448e-10	14.9397
232431	Gprc5a	G protein-coupled receptor, family C, group 5, member A	-1.69105	8.49388	-10.9521	4.75852e-11	4.9577e-10	14.9339
11758	Prdx6	peroxiredoxin 6	-1.28053	8.37903	-10.9468	4.807e-11	5.00503e-10	14.9195
100526556	Mir3091	microRNA 3091	-3.52136	-0.279307	-10.9218	4.84175e-11	5.03801e-10	14.9953
70354	Secisbp2l	SECIS binding protein 2-like	1.24759	6.43769	10.935	4.8903e-11	5.08529e-10	14.9465
100039968	Tmem35b	transmembrane protein 35B	2.239	1.80398	10.9076	4.97523e-11	5.16983e-10	15.3407
15950	Ifi203	interferon activated gene 203	4.2096	1.43435	10.9285	4.97791e-11	5.16983e-10	15.3262
12729	Clns1a	chloride channel, nucleotide-sensitive, 1A	-1.24002	6.22134	-10.9232	4.9922e-11	5.18138e-10	14.9266
52163	Camk1	calcium/calmodulin-dependent protein kinase I	1.31201	5.65219	10.9131	5.08477e-11	5.27412e-10	14.9595
17122	Mxd4	Max dimerization protein 4	2.17325	2.89735	10.8968	5.10224e-11	5.2887e-10	15.2945
26572	Cops3	COP9 signalosome subunit 3	-1.5402	6.37304	-10.9153	5.10529e-11	5.2887e-10	14.9078
225348	Wdr36	WD repeat domain 36	-0.998796	7.15187	-10.8937	5.11011e-11	5.29035e-10	14.8736
214804	Syde2	synapse defective 1, Rho GTPase, homolog 2 (C. elegans)	-1.38968	4.0331	-10.8907	5.13937e-11	5.31394e-10	15.1945
30963	Hacd1	3-hydroxyacyl-CoA dehydratase 1	-1.7083	4.87383	-10.9118	5.13938e-11	5.31394e-10	14.9787
110074	Dut	deoxyuridine triphosphatase	-1.72052	7.00729	-10.9029	5.2275e-11	5.40164e-10	14.8592
67768	N6amt1	N-6 adenine-specific DNA methyltransferase 1 (putative)	-1.29656	3.95992	-10.8793	5.25333e-11	5.4249e-10	15.0688
12417	Cbx3	chromobox 3	-0.867014	6.79073	-10.8713	5.33468e-11	5.50544e-10	14.8326
13198	Ddit3	DNA-damage inducible transcript 3	1.77526	3.80996	10.8732	5.36798e-11	5.53632e-10	15.1592
244562	Abcc12	ATP-binding cassette, sub-family C (CFTR/MRP), member 12	-5.92812	-1.34618	-10.8726	5.37447e-11	5.53953e-10	14.1833
78244	Dnajc21	DnaJ heat shock protein family (Hsp40) member C21	-0.939173	6.15072	-10.8636	5.41396e-11	5.57672e-10	14.8402
26377	Dapp1	dual adaptor for phosphotyrosine and 3-phosphoinositides 1	1.28006	4.43544	10.8614	5.43676e-11	5.59669e-10	15.0213
20728	Spic	Spi-C transcription factor (Spi-1/PU.1 related)	7.03815	-5.24995	10.8603	5.44909e-11	5.60586e-10	12.5987
17075	Epcam	epithelial cell adhesion molecule	4.35051	6.32133	10.8786	5.47713e-11	5.63116e-10	14.9736
20603	Sms	spermine synthase	-1.48045	6.18893	-10.877	5.49346e-11	5.64314e-10	14.8224
52846	Cnot11	CCR4-NOT transcription complex, subunit 11	-0.916247	5.54719	-10.8558	5.49567e-11	5.64314e-10	14.8853
320472	Ppm1e	protein phosphatase 1E (PP2C domain containing)	-3.44678	0.150254	-10.8566	5.50445e-11	5.64861e-10	15.1403
66522	Pgpep1	pyroglutamyl-peptidase I	1.2782	5.31836	10.8519	5.54679e-11	5.6885e-10	14.9283
211401	Mtss1	MTSS I-BAR domain containing 1	1.05938	6.46655	10.85	5.55751e-11	5.69593e-10	14.8142
72169	Trim29	tripartite motif-containing 29	4.79187	2.52352	10.868	5.58878e-11	5.72439e-10	15.212
269423	Abhd18	abhydrolase domain containing 18	2.49778	0.814486	10.8462	5.59881e-11	5.73108e-10	15.182
78929	Polr3h	polymerase (RNA) III (DNA directed) polypeptide H	-1.46634	5.68131	-10.8626	5.64713e-11	5.77693e-10	14.8699
68730	Dus1l	dihydrouridine synthase 1-like (S. cerevisiae)	-0.822308	5.11972	-10.8411	5.65392e-11	5.78026e-10	14.8738
74197	Gtf2e1	general transcription factor II E, polypeptide 1 (alpha subunit)	-0.912667	4.81302	-10.84	5.66562e-11	5.78862e-10	14.8845
217365	Nploc4	NPL4 homolog, ubiquitin recognition factor	-0.927808	7.48792	-10.8373	5.69536e-11	5.81324e-10	14.7545
19200	Pstpip1	proline-serine-threonine phosphatase-interacting protein 1	4.49815	2.04734	10.8581	5.69682e-11	5.81324e-10	15.2083
27027	Tspan32	tetraspanin 32	6.41939	-0.493885	10.8521	5.76198e-11	5.87608e-10	14.7791
72322	Xpo5	exportin 5	-1.49748	7.12887	-10.8514	5.77002e-11	5.88061e-10	14.7596
226999	Slc9a2	solute carrier family 9 (sodium/hydrogen exchanger), member 2	-2.38331	4.57805	-10.8506	5.77868e-11	5.88577e-10	15.04
22022	Tpst2	protein-tyrosine sulfotransferase 2	-1.18876	6.12497	-10.84	5.78252e-11	5.88602e-10	14.7836
433864	Nom1	nucleolar protein with MIF4G domain 1	-0.679697	6.35319	-10.8275	5.8047e-11	5.90493e-10	14.7713
20595	Smn1	survival motor neuron 1	-1.34429	5.25856	-10.8395	5.84888e-11	5.94618e-10	14.8454
56699	Cdc42ep4	CDC42 effector protein (Rho GTPase binding) 4	1.07046	5.08192	10.8224	5.86127e-11	5.95204e-10	14.8719
100073351	Yy2	Yy2 transcription factor	-1.35813	3.91457	-10.8221	5.86541e-11	5.95204e-10	14.9796
237175	Adgrg2	adhesion G protein-coupled receptor G2	-2.54977	2.14652	-10.8343	5.86554e-11	5.95204e-10	15.1757
16181	Il1rn	interleukin 1 receptor antagonist	2.10961	6.37226	10.8392	5.90663e-11	5.99001e-10	14.7435
17159	Man2b1	mannosidase 2, alpha B1	2.10384	6.70997	10.8381	5.91997e-11	5.99983e-10	14.7325
16580	Kifc5b	kinesin family member C5B	-1.38934	3.32295	-10.816	5.93468e-11	6.01102e-10	15.0667
237500	Tmtc3	transmembrane and tetratricopeptide repeat containing 3	-1.23855	5.90504	-10.8302	5.97463e-11	6.04774e-10	14.745
78832	Cacul1	CDK2 associated, cullin domain 1	-0.711435	6.96203	-10.8107	5.99573e-11	6.06535e-10	14.7029
15357	Hmgcr	3-hydroxy-3-methylglutaryl-Coenzyme A reductase	-0.866399	7.20655	-10.8016	6.10163e-11	6.16867e-10	14.6851
66445	Cyc1	cytochrome c-1	-1.19698	7.50143	-10.8206	6.11394e-11	6.1773e-10	14.6824
23908	Hs2st1	heparan sulfate 2-O-sulfotransferase 1	-0.989787	6.79891	-10.7965	6.16241e-11	6.22158e-10	14.68
21928	Tnfaip2	tumor necrosis factor, alpha-induced protein 2	1.00501	6.79699	10.7962	6.16536e-11	6.22158e-10	14.6819
72400	Pinx1	PIN2/TERF1 interacting, telomerase inhibitor 1	-1.52829	3.93	-10.8021	6.17363e-11	6.22551e-10	14.9247
108737	Oxsr1	oxidative-stress responsive 1	-0.644572	6.95354	-10.7953	6.17686e-11	6.22551e-10	14.6818
70510	Rnf167	ring finger protein 167	1.27196	4.85102	10.7934	6.1987e-11	6.24369e-10	14.8354
72542	Pgam5	phosphoglycerate mutase family member 5	-0.927419	6.73362	-10.7883	6.26001e-11	6.30156e-10	14.6834
231507	Plac8	placenta-specific 8	-2.81148	7.182	-10.8075	6.27789e-11	6.31568e-10	14.6699
216441	Slc26a10	solute carrier family 26, member 10	2.77503	1.78377	10.7865	6.28279e-11	6.31673e-10	15.0847
59040	Rhot1	ras homolog family member T1	-0.770235	6.32468	-10.7809	6.35072e-11	6.38111e-10	14.6745
213417	Klhdc8a	kelch domain containing 8A	-1.84496	3.28287	-10.7771	6.39744e-11	6.42411e-10	15.0273
69550	Bst2	bone marrow stromal cell antigen 2	2.81058	4.53442	10.7963	6.41586e-11	6.43866e-10	14.8399
69573	Hilpda	hypoxia inducible lipid droplet associated	2.26044	6.01163	10.7939	6.4453e-11	6.46424e-10	14.6977
15388	Hnrnpl	heterogeneous nuclear ribonucleoprotein L	-0.749968	8.42152	-10.7698	6.48907e-11	6.50416e-10	14.606
12053	Bcl6	B cell leukemia/lymphoma 6	2.227	3.72981	10.7899	6.49509e-11	6.50622e-10	14.9731
13690	Eif4g2	eukaryotic translation initiation factor 4, gamma 2	-0.836393	10.3632	-10.7666	6.52855e-11	6.53574e-10	14.6
18674	Slc25a3	solute carrier family 25 (mitochondrial carrier, phosphate carrier), member 3	-1.13007	8.207	-10.7786	6.56574e-11	6.56894e-10	14.5985
230734	Yrdc	yrdC domain containing (E.coli)	-1.30087	6.152	-10.7822	6.58388e-11	6.58308e-10	14.6762
27393	Mrpl39	mitochondrial ribosomal protein L39	-0.923671	5.59804	-10.7584	6.63312e-11	6.62827e-10	14.6632
13033	Ctsd	cathepsin D	1.89796	9.43075	10.7767	6.66263e-11	6.65369e-10	14.5822
76681	Trim12a	tripartite motif-containing 12A	6.14955	0.405702	10.7733	6.70676e-11	6.69368e-10	14.3459
319801	Tigar	Trp53 induced glycolysis regulatory phosphatase	-0.927158	4.67672	-10.741	6.86122e-11	6.84367e-10	14.7255
23874	Farsb	phenylalanyl-tRNA synthetase, beta subunit	-0.831047	6.90947	-10.7373	6.91075e-11	6.88888e-10	14.5753
229317	Eif2a	eukaryotic translation initiation factor 2A	-1.17778	7.02899	-10.7479	6.99306e-11	6.96668e-10	14.5541
11910	Atf3	activating transcription factor 3	2.55237	6.44514	10.7509	7.00304e-11	6.97239e-10	14.6136
66525	Timm50	translocase of inner mitochondrial membrane 50	-1.18866	5.89049	-10.7379	7.01069e-11	6.97576e-10	14.6039
171167	Fut10	fucosyltransferase 10	-3.44133	0.631835	-10.7471	7.05484e-11	7.01543e-10	14.9892
19296	Pvt1	Pvt1 oncogene	-1.08288	4.5692	-10.7249	7.07889e-11	7.03508e-10	14.7332
76365	Tbx18	T-box18	-3.6091	0.402912	-10.7441	7.09601e-11	7.04782e-10	14.9872
18669	Abcb1b	ATP-binding cassette, sub-family B (MDR/TAP), member 1B	-1.00581	6.72003	-10.7204	7.14074e-11	7.08794e-10	14.5224
18521	Pcbp2	poly(rC) binding protein 2	-0.833494	8.79864	-10.7201	7.14555e-11	7.08842e-10	14.5063
109689	Arrb1	arrestin, beta 1	2.02821	5.26836	10.7385	7.17325e-11	7.11159e-10	14.6086
12364	Casp12	caspase 12	5.10433	-1.61774	10.7313	7.19508e-11	7.12892e-10	14.4717
68644	Abhd14a	abhydrolase domain containing 14A	-1.19968	3.38384	-10.7144	7.2246e-11	7.15271e-10	14.7951
72016	Tedc2	tubulin epsilon and delta complex 2	-1.06808	3.85777	-10.7142	7.22782e-11	7.15271e-10	14.7678
20460	Stil	Scl/Tal1 interrupting locus	-1.52622	5.20584	-10.7337	7.23917e-11	7.15961e-10	14.6811
67441	Isoc2b	isochorismatase domain containing 2b	3.28175	-0.0362626	10.7114	7.26643e-11	7.18224e-10	14.6635
72844	Kctd17	potassium channel tetramerisation domain containing 17	-1.57837	4.49779	-10.7299	7.2931e-11	7.20424e-10	14.7051
66882	Bzw1	basic leucine zipper and W2 domains 1	-1.17447	9.3536	-10.7256	7.35357e-11	7.25532e-10	14.4797
19367	Rad9a	RAD9 checkpoint clamp component A	-0.969583	5.51635	-10.7053	7.35366e-11	7.25532e-10	14.5772
53895	Clpp	caseinolytic mitochondrial matrix peptidase proteolytic subunit	-1.49077	5.80062	-10.7201	7.43309e-11	7.32672e-10	14.5637
13831	Epc1	enhancer of polycomb homolog 1	1.03996	5.09576	10.6996	7.43498e-11	7.32672e-10	14.6343
68763	1110038B12Rik	RIKEN cDNA 1110038B12 gene	-1.84604	6.73558	-10.717	7.47784e-11	7.36453e-10	14.5041
242860	Rsbn1l	round spermatid basic protein 1-like	0.853618	5.23428	10.6924	7.53995e-11	7.42123e-10	14.5701
100042856	Gvin2	GTPase, very large interferon inducible, family member 2	7.5546	-4.41923	10.692	7.54929e-11	7.42597e-10	12.7477
70984	4931406C07Rik	RIKEN cDNA 4931406C07 gene	1.45049	4.44717	10.7005	7.66892e-11	7.53911e-10	14.6231
67472	Mtfr1	mitochondrial fission regulator 1	-0.976315	6.7065	-10.6829	7.68107e-11	7.54652e-10	14.4744
272322	Arntl2	aryl hydrocarbon receptor nuclear translocator-like 2	3.01201	1.86137	10.7023	7.69351e-11	7.55421e-10	14.9044
76051	Ganc	glucosidase, alpha; neutral C	2.23663	2.92994	10.6873	7.72868e-11	7.5842e-10	14.8837
16453	Jak3	Janus kinase 3	2.49945	4.73643	10.6989	7.74353e-11	7.59423e-10	14.588
54137	Acrbp	proacrosin binding protein	3.54083	2.16082	10.6969	7.7741e-11	7.61964e-10	14.9031
12835	Col6a3	collagen, type VI, alpha 3	3.36735	1.93918	10.6942	7.81469e-11	7.65166e-10	14.7159
381038	Parl	presenilin associated, rhomboid-like	-1.16609	6.18879	-10.6857	7.81611e-11	7.65166e-10	14.4623
223753	Cerk	ceramide kinase	2.11936	4.67902	10.6933	7.82923e-11	7.65993e-10	14.5589
217216	Hrob	homologous recombination factor with OB-fold	-1.87715	3.79841	-10.6916	7.85493e-11	7.68048e-10	14.7263
12514	Cd68	CD68 antigen	4.73818	4.29645	10.6823	7.99745e-11	7.81517e-10	14.7483
14815	Nr3c1	nuclear receptor subfamily 3, group C, member 1	1.01022	6.13597	10.6603	8.02646e-11	7.83884e-10	14.4433
56405	Dusp14	dual specificity phosphatase 14	-1.71634	4.72273	-10.6696	8.19746e-11	8.00107e-10	14.6189
12608	Cebpb	CCAAT/enhancer binding protein (C/EBP), beta	2.62296	5.20635	10.6686	8.21386e-11	8.01231e-10	14.5556
67305	Gpx7	glutathione peroxidase 7	8.89137	-4.64557	10.6595	8.30088e-11	8.09237e-10	12.3955
21652	Phf1	PHD finger protein 1	1.27594	4.68007	10.6408	8.33807e-11	8.12379e-10	14.5466
100217451	Snora7a	small nucleolar RNA, H/ACA box 7A	-1.62976	1.03588	-10.6382	8.38039e-11	8.16017e-10	14.8212
56312	Nupr1	nuclear protein transcription regulator 1	2.34555	4.86856	10.6531	8.46393e-11	8.23662e-10	14.6175
52428	Rhpn2	rhophilin, Rho GTPase binding protein 2	-1.36158	5.49721	-10.6526	8.47227e-11	8.23984e-10	14.4411
22171	Tyms	thymidylate synthase	-1.55975	6.47505	-10.6523	8.47796e-11	8.24047e-10	14.3822
94232	Ubqln4	ubiquilin 4	-0.982	7.31184	-10.6262	8.57829e-11	8.33305e-10	14.3376
76813	Armc6	armadillo repeat containing 6	-1.07668	4.14873	-10.6256	8.58911e-11	8.33862e-10	14.5414
56422	Hbs1l	Hbs1-like (S. cerevisiae)	-0.722137	5.95525	-10.6245	8.60668e-11	8.35073e-10	14.3874
18475	Pafah1b2	platelet-activating factor acetylhydrolase, isoform 1b, subunit 2	-0.780056	7.25928	-10.6242	8.61214e-11	8.35107e-10	14.3311
99138	Stard7	START domain containing 7	-0.721799	6.847	-10.6225	8.63994e-11	8.37307e-10	14.34
11797	Birc2	baculoviral IAP repeat-containing 2	1.05066	4.53975	10.6207	8.67067e-11	8.39789e-10	14.4995
208643	Eif4g1	eukaryotic translation initiation factor 4, gamma 1	-1.23202	9.78745	-10.6403	8.67826e-11	8.40027e-10	14.311
53356	Eif3g	eukaryotic translation initiation factor 3, subunit G	-0.97396	7.05448	-10.6161	8.74896e-11	8.4637e-10	14.3232
11425	Apoc4	apolipoprotein C-IV	6.32308	-5.32184	10.615	8.76812e-11	8.47723e-10	12.2077
74732	Stx11	syntaxin 11	1.72521	2.61908	10.6041	8.95639e-11	8.65415e-10	14.7473
59290	Gpa33	glycoprotein A33 (transmembrane)	3.95471	4.71826	10.6213	9.0045e-11	8.6955e-10	14.5951
12606	Cebpa	CCAAT/enhancer binding protein (C/EBP), alpha	4.57683	2.22221	10.6184	9.05635e-11	8.74042e-10	14.7454
226422	Rab29	RAB29, member RAS oncogene family	3.3819	1.89392	10.6172	9.07629e-11	8.7545e-10	14.7446
216527	Ccm2	cerebral cavernous malformation 2	-0.923048	5.89418	-10.5967	9.08664e-11	8.75932e-10	14.3336
320538	Ubn2	ubinuclein 2	1.55134	5.57941	10.6147	9.12182e-11	8.78705e-10	14.3774
66665	Msantd3	Myb/SANT-like DNA-binding domain containing 3	-1.37872	4.6466	-10.6001	9.12613e-11	8.78705e-10	14.4754
59053	Hgh1	HGH1 homolog	-1.39951	4.82753	-10.6035	9.17482e-11	8.82874e-10	14.4428
67390	Mrm3	mitochondrial rRNA methyltransferase 3	-1.87305	3.10493	-10.6004	9.20084e-11	8.84858e-10	14.6348
70997	Spef1	sperm flagellar 1	2.47384	3.85165	10.6061	9.27554e-11	8.91519e-10	14.5946
223499	Dcaf13	DDB1 and CUL4 associated factor 13	-1.36711	6.71025	-10.6029	9.33326e-11	8.9654e-10	14.2751
108911	Rcc2	regulator of chromosome condensation 2	-0.924843	8.44493	-10.5799	9.39178e-11	9.01633e-10	14.2295
83486	Rbm5	RNA binding motif protein 5	0.911618	6.27807	10.578	9.42623e-11	9.04117e-10	14.2809
232164	Paip2b	poly(A) binding protein interacting protein 2B	-0.933141	6.40301	-10.5779	9.4287e-11	9.04117e-10	14.2822
238673	Zfp367	zinc finger protein 367	-1.22913	5.72617	-10.5872	9.44096e-11	9.04763e-10	14.3275
76073	Pcgf5	polycomb group ring finger 5	-0.970197	5.14066	-10.5753	9.47546e-11	9.07539e-10	14.352
108067	Eif2b3	eukaryotic translation initiation factor 2B, subunit 3	-1.17793	5.21264	-10.5667	9.63769e-11	9.22537e-10	14.347
75751	Ipo4	importin 4	-1.35105	7.07276	-10.582	9.72202e-11	9.30066e-10	14.2201
26886	Cenph	centromere protein H	-1.62338	4.10889	-10.5752	9.80313e-11	9.37278e-10	14.4558
545260	Arsi	arylsulfatase i	7.80768	-4.90893	10.5519	9.92094e-11	9.47988e-10	12.2354
70422	Ints2	integrator complex subunit 2	-0.891011	6.25319	-10.5498	9.96146e-11	9.51305e-10	14.2132
20872	Stk16	serine/threonine kinase 16	-0.89921	5.75458	-10.5494	9.97052e-11	9.51615e-10	14.2263
232288	Frmd4b	FERM domain containing 4B	1.9441	5.15399	10.5677	9.99728e-11	9.52889e-10	14.3277
12832	Col5a2	collagen, type V, alpha 2	4.18774	-0.375296	10.5677	9.99826e-11	9.52889e-10	14.5251
20638	Snrpb	small nuclear ribonucleoprotein B	-1.13874	8.15904	-10.5646	1.00013e-10	9.52889e-10	14.1709
68285	C630043F03Rik	RIKEN cDNA C630043F03 gene	-2.24094	1.55479	-10.5481	1.00245e-10	9.54544e-10	14.6381
215512	Fam117a	family with sequence similarity 117, member A	1.95242	2.99824	10.5514	1.00686e-10	9.58181e-10	14.5753
113868	Acaa1a	acetyl-Coenzyme A acyltransferase 1A	1.27522	5.12331	10.5491	1.02026e-10	9.70374e-10	14.2714
14455	Gas5	growth arrest specific 5	-1.79867	8.57915	-10.5484	1.0382e-10	9.86867e-10	14.129
67419	Armh4	armadillo-like helical domain containing 4	5.31033	-5.60107	10.5278	1.04007e-10	9.87963e-10	11.9815
381293	Kif14	kinesin family member 14	-1.28874	4.56958	-10.5283	1.04056e-10	9.87963e-10	14.3165
77209	8030453O22Rik	RIKEN cDNA 8030453O22 gene	7.03532	-5.25053	10.5264	1.04299e-10	9.89309e-10	12.1528
70028	Dop1b	DOP1 leucine zipper like protein B	2.07473	4.95782	10.5458	1.04353e-10	9.89309e-10	14.3041
74237	Tubgcp2	tubulin, gamma complex associated protein 2	-1.05847	5.4436	-10.526	1.04379e-10	9.89309e-10	14.2289
231134	Dok7	docking protein 7	-2.62901	3.02494	-10.5444	1.04634e-10	9.91147e-10	14.5378
226977	Actr1b	ARP1 actin-related protein 1B, centractin beta	-0.976442	7.03035	-10.5231	1.0498e-10	9.93848e-10	14.137
69684	Aarsd1	alanyl-tRNA synthetase domain containing 1	-1.00312	4.87031	-10.5202	1.05573e-10	9.98353e-10	14.2372
225215	Rsl24d1	ribosomal L24 domain containing 1	-1.3638	5.97797	-10.5398	1.05577e-10	9.98353e-10	14.1815
20462	Tra2b	transformer 2 beta	-1.15846	7.28547	-10.5352	1.06073e-10	1.00198e-09	14.1184
11545	Parp1	poly (ADP-ribose) polymerase family, member 1	-1.25	7.2501	-10.5374	1.06083e-10	1.00198e-09	14.123
67963	Npc2	NPC intracellular cholesterol transporter 2	1.60549	7.66644	10.5306	1.07496e-10	1.01474e-09	14.1006
68364	0610030E20Rik	RIKEN cDNA 0610030E20 gene	1.78968	4.3393	10.5302	1.07586e-10	1.01501e-09	14.335
210009	Mtrr	5-methyltetrahydrofolate-homocysteine methyltransferase reductase	-1.00079	5.23124	-10.508	1.08142e-10	1.01966e-09	14.2294
67755	Ddx47	DEAD box helicase 47	-0.704839	6.7334	-10.4991	1.10055e-10	1.0371e-09	14.0977
12453	Ccni	cyclin I	0.601966	7.72119	10.4975	1.10395e-10	1.03971e-09	14.0705
13835	Epha1	Eph receptor A1	4.26319	3.01987	10.5154	1.10745e-10	1.04241e-09	14.5457
19777	Uri1	URI1, prefoldin-like chaperone	-0.90986	5.5683	-10.4929	1.11397e-10	1.0477e-09	14.1558
67661	Ift172	intraflagellar transport 172	1.51382	4.71236	10.5123	1.11436e-10	1.0477e-09	14.2664
74044	Ttf2	transcription termination factor, RNA polymerase II	-1.31881	5.51354	-10.5105	1.11821e-10	1.05072e-09	14.155
27279	Tnfrsf12a	tumor necrosis factor receptor superfamily, member 12a	-1.6641	7.96398	-10.5037	1.1332e-10	1.0642e-09	14.0471
67213	Cmtm6	CKLF-like MARVEL transmembrane domain containing 6	1.65889	6.04246	10.4973	1.14757e-10	1.07707e-09	14.0996
215351	Senp6	SUMO/sentrin specific peptidase 6	-0.71863	6.21646	-10.4757	1.15235e-10	1.08094e-09	14.0569
69288	Rhobtb1	Rho-related BTB domain containing 1	1.53793	2.50297	10.4723	1.16021e-10	1.08769e-09	14.4305
23988	Pin1	protein (peptidyl-prolyl cis/trans isomerase) NIMA-interacting 1	-1.53732	5.97851	-10.4911	1.16149e-10	1.08827e-09	14.0934
56017	Slc2a8	solute carrier family 2, (facilitated glucose transporter), member 8	2.03102	2.6266	10.4702	1.16496e-10	1.09089e-09	14.4742
67299	Dock7	dedicator of cytokinesis 7	1.16519	6.09897	10.4842	1.16705e-10	1.09186e-09	14.0518
24001	Tiam2	T cell lymphoma invasion and metastasis 2	-1.47698	5.93549	-10.4886	1.16732e-10	1.09186e-09	14.1004
14221	Fjx1	four jointed box 1	-3.34129	3.69444	-10.4873	1.17022e-10	1.09394e-09	14.4703
230766	Fam167b	family with sequence similarity 167, member B	8.42943	-4.86688	10.4687	1.19115e-10	1.11287e-09	12.1316
19076	Prim2	DNA primase, p58 subunit	-1.43932	5.61724	-10.4708	1.20885e-10	1.12848e-09	14.0718
239081	Tlr11	toll-like receptor 11	5.242	-5.53771	10.4513	1.20924e-10	1.12848e-09	11.871
13211	Dhx9	DEAH (Asp-Glu-Ala-His) box polypeptide 9	-1.06623	8.79954	-10.4602	1.21135e-10	1.12981e-09	13.9682
59049	Slc22a17	solute carrier family 22 (organic cation transporter), member 17	3.42175	1.26466	10.4514	1.22329e-10	1.1403e-09	14.3802
58860	Adamdec1	ADAM-like, decysin 1	8.75841	-4.59474	10.4579	1.23138e-10	1.14682e-09	12.1168
22334	Vdac2	voltage-dependent anion channel 2	-0.95289	8.20366	-10.442	1.23169e-10	1.14682e-09	13.9511
319236	Trim12c	tripartite motif-containing 12C	8.49642	1.34471	10.4594	1.23629e-10	1.15045e-09	13.4472
30791	Slc39a1	solute carrier family 39 (zinc transporter), member 1	0.700209	6.89352	10.439	1.23897e-10	1.15229e-09	13.969
52683	Ncaph2	non-SMC condensin II complex, subunit H2	-0.761559	7.58136	-10.4379	1.24157e-10	1.15406e-09	13.9492
14884	Gtf2h1	general transcription factor II H, polypeptide 1	-0.77917	6.53331	-10.437	1.244e-10	1.15566e-09	13.9902
76482	Rmc1	regulator of MON1-CCZ1	0.824553	5.3073	10.435	1.24874e-10	1.15941e-09	14.0754
269224	Pask	PAS domain containing serine/threonine kinase	-1.18131	4.50354	-10.4306	1.25971e-10	1.16892e-09	14.1433
15387	Hnrnpk	heterogeneous nuclear ribonucleoprotein K	-0.684232	9.15952	-10.4284	1.26514e-10	1.1733e-09	13.9203
78558	Htra3	HtrA serine peptidase 3	5.7145	0.6412	10.442	1.27934e-10	1.1858e-09	14.3767
378700	Bpifb3	BPI fold containing family B, member 3	-5.51429	-3.3958	-10.4221	1.28101e-10	1.18668e-09	13.395
68479	Phf5a	PHD finger protein 5A	-1.45533	6.66431	-10.4367	1.29269e-10	1.19682e-09	13.9425
240888	Gpr161	G protein-coupled receptor 161	-4.41046	0.593378	-10.4364	1.29355e-10	1.19693e-09	14.2331
236792	Mmgt1	membrane magnesium transporter 1	-1.09924	6.08153	-10.4219	1.29653e-10	1.19901e-09	13.9552
15273	Hivep2	human immunodeficiency virus type I enhancer binding protein 2	2.31614	4.723	10.4346	1.2981e-10	1.19979e-09	14.1163
67973	Mphosph10	M-phase phosphoprotein 10 (U3 small nucleolar ribonucleoprotein)	-1.37269	5.88428	-10.4325	1.30363e-10	1.20422e-09	13.9744
77219	Ptgr2	prostaglandin reductase 2	1.11744	5.19694	10.4102	1.31165e-10	1.21095e-09	14.0452
100177	Zmym6	zinc finger, MYM-type 6	1.14628	4.42321	10.4092	1.31419e-10	1.21202e-09	14.128
269180	Inpp4a	inositol polyphosphate-4-phosphatase, type I	1.87472	3.99882	10.4283	1.31429e-10	1.21202e-09	14.1801
12499	Entpd5	ectonucleoside triphosphate diphosphohydrolase 5	2.60296	4.22643	10.4272	1.31721e-10	1.21403e-09	14.1715
72655	Snhg5	small nucleolar RNA host gene 5	-1.90515	5.77885	-10.4262	1.31982e-10	1.21575e-09	13.9582
207818	Smagp	small cell adhesion glycoprotein	3.08019	4.3611	10.4254	1.3218e-10	1.21689e-09	14.2983
214523	Tmprss4	transmembrane protease, serine 4	7.65912	-3.35226	10.403	1.33029e-10	1.22402e-09	12.0221
56372	1110004F10Rik	RIKEN cDNA 1110004F10 gene	-1.22042	6.53658	-10.4218	1.33141e-10	1.22436e-09	13.9096
27756	Lsm2	LSM2 homolog, U6 small nuclear RNA and mRNA degradation associated	-1.58781	5.75254	-10.4162	1.34607e-10	1.23714e-09	13.9346
67139	Mis12	MIS12 kinetochore complex component	-0.740498	5.76855	-10.3968	1.34693e-10	1.23724e-09	13.9432
171170	Mbnl3	muscleblind like splicing factor 3	-2.224	3.46977	-10.4151	1.34899e-10	1.23844e-09	14.1593
15574	Hus1	HUS1 checkpoint clamp component	-0.946025	4.91134	-10.3876	1.3717e-10	1.25859e-09	14.0196
72549	Reep4	receptor accessory protein 4	-0.918051	5.81158	-10.3811	1.38945e-10	1.27415e-09	13.9071
14385	Slc37a4	solute carrier family 37 (glucose-6-phosphate transporter), member 4	0.881759	4.05826	10.379	1.39506e-10	1.27859e-09	14.0692
242642	Hpdl	4-hydroxyphenylpyruvate dioxygenase-like	-2.57553	2.26785	-10.3855	1.40385e-10	1.2853e-09	14.3205
70238	Rnf168	ring finger protein 168	-0.803769	5.56019	-10.3758	1.40396e-10	1.2853e-09	13.9037
67725	Nudt13	nudix (nucleoside diphosphate linked moiety X)-type motif 13	1.56435	1.9527	10.3751	1.4061e-10	1.28655e-09	14.2963
13076	Cyp1a1	cytochrome P450, family 1, subfamily a, polypeptide 1	-6.00434	-1.16048	-10.3884	1.40753e-10	1.28713e-09	13.4244
320299	Iqcb1	IQ calmodulin-binding motif containing 1	-1.52445	3.95389	-10.3899	1.41774e-10	1.29574e-09	14.0336
319757	Smo	smoothened, frizzled class receptor	-1.79963	5.31742	-10.3893	1.41944e-10	1.29657e-09	13.9018
232087	Mat2a	methionine adenosyltransferase II, alpha	-0.660158	8.22991	-10.3659	1.43197e-10	1.30729e-09	13.7979
66254	Dimt1	DIM1 dimethyladenosine transferase 1-like (S. cerevisiae)	-1.56788	4.62088	-10.3825	1.4386e-10	1.31261e-09	14.0106
22591	Xpc	xeroderma pigmentosum, complementation group C	0.978867	4.41122	10.3617	1.44381e-10	1.31663e-09	14.0457
100038999	Gm13552	mitochondrial ribosomal protein S18B pseudogene	-2.14947	1.67673	-10.359	1.45169e-10	1.32308e-09	14.289
22384	Eif4h	eukaryotic translation initiation factor 4H	-0.650556	9.21015	-10.3489	1.48094e-10	1.34899e-09	13.7592
72472	Slc16a10	solute carrier family 16 (monocarboxylic acid transporters), member 10	1.78471	3.01572	10.3666	1.48475e-10	1.35171e-09	14.0868
16175	Il1a	interleukin 1 alpha	8.96545	2.22605	10.3661	1.48613e-10	1.35222e-09	13.8984
386454	Rnf39	ring finger protein 39	-1.64682	4.42974	-10.3635	1.49365e-10	1.3583e-09	14.0034
54364	Rpp30	ribonuclease P/MRP 30 subunit	-1.82842	5.07384	-10.3618	1.49896e-10	1.36237e-09	13.875
12740	Cldn4	claudin 4	4.44178	6.40028	10.3604	1.50286e-10	1.36516e-09	13.9814
109801	Glo1	glyoxalase 1	-1.13948	6.08571	-10.3471	1.51941e-10	1.37943e-09	13.7875
231713	Naa25	N(alpha)-acetyltransferase 25, NatB auxiliary subunit	-1.0091	6.70602	-10.3327	1.52953e-10	1.38785e-09	13.7777
319211	Nol4	nucleolar protein 4	-4.08973	-1.11358	-10.3354	1.53531e-10	1.39232e-09	13.9785
66412	Arrdc4	arrestin domain containing 4	5.21676	2.82357	10.3466	1.54449e-10	1.39987e-09	14.2279
15500	Hsf2	heat shock factor 2	-1.208	4.25434	-10.3273	1.54614e-10	1.40059e-09	13.9227
229541	Dennd4b	DENN/MADD domain containing 4B	3.48116	3.1357	10.3446	1.55069e-10	1.40394e-09	14.1274
229709	Ahcyl1	S-adenosylhomocysteine hydrolase-like 1	-0.757509	7.77783	-10.3222	1.5619e-10	1.4133e-09	13.7127
383295	Ypel5	yippee like 5	1.34092	6.00354	10.3384	1.57007e-10	1.41927e-09	13.7969
56070	Tcerg1	transcription elongation regulator 1 (CA150)	-0.690828	7.1404	-10.3195	1.57023e-10	1.41927e-09	13.7202
13607	Eda	ectodysplasin-A	-2.59447	1.70833	-10.3248	1.57688e-10	1.42449e-09	14.2078
15211	Hexa	hexosaminidase A	6.05779	2.27318	10.3353	1.57969e-10	1.42582e-09	14.1785
77035	Kdm8	lysine (K)-specific demethylase 8	-1.17377	3.26006	-10.3163	1.58009e-10	1.42582e-09	14.0298
108699	Chn1	chimerin 1	-3.30853	1.0244	-10.328	1.5852e-10	1.42929e-09	14.1716
17136	Mag	myelin-associated glycoprotein	8.44983	-4.96785	10.3268	1.58568e-10	1.42929e-09	11.9304
14269	Fnbp1	formin binding protein 1	1.96876	5.39136	10.3317	1.59085e-10	1.43253e-09	13.8212
170677	Cdhr1	cadherin-related family member 1	-4.00416	-0.701432	-10.3129	1.59102e-10	1.43253e-09	13.9246
54130	Actr1a	ARP1 actin-related protein 1A, centractin alpha	-0.756873	7.70172	-10.3123	1.593e-10	1.43353e-09	13.6941
20657	Sod3	superoxide dismutase 3, extracellular	3.83686	3.03128	10.3285	1.60091e-10	1.43985e-09	13.9913
217666	L2hgdh	L-2-hydroxyglutarate dehydrogenase	-1.00197	4.40122	-10.3092	1.60267e-10	1.44064e-09	13.888
28240	Trpm2	transient receptor potential cation channel, subfamily M, member 2	10.9918	-4.17364	10.3254	1.61094e-10	1.44674e-09	11.9651
319974	Auts2	autism susceptibility candidate 2	-3.29848	1.50952	-10.3253	1.61122e-10	1.44674e-09	14.1885
54721	Tyk2	tyrosine kinase 2	1.74824	4.75113	10.3225	1.62038e-10	1.45417e-09	13.8555
100504593	Gm13431	predicted gene 13431	8.31368	-2.23007	10.3108	1.62799e-10	1.4602e-09	11.9063
68981	Snrpa1	small nuclear ribonucleoprotein polypeptide A'	-1.30668	5.96212	-10.3179	1.63506e-10	1.46574e-09	13.7248
11421	Ace	angiotensin I converting enzyme (peptidyl-dipeptidase A) 1	3.29762	0.968651	10.3173	1.6371e-10	1.46677e-09	14.1133
77626	Smpd4	sphingomyelin phosphodiesterase 4	-1.08804	6.09669	-10.3015	1.64303e-10	1.47127e-09	13.7181
14287	Fpgs	folylpolyglutamyl synthetase	-1.14948	5.83619	-10.3	1.64432e-10	1.47153e-09	13.7711
98711	Rdh10	retinol dehydrogenase 10 (all-trans)	-1.44953	7.89823	-10.3148	1.64512e-10	1.47153e-09	13.6671
22333	Vdac1	voltage-dependent anion channel 1	-0.784761	8.67221	-10.2917	1.65964e-10	1.48371e-09	13.6437
235505	Cd109	CD109 antigen	-3.52914	2.61594	-10.309	1.66431e-10	1.48708e-09	14.0804
15490	Hsd17b7	hydroxysteroid (17-beta) dehydrogenase 7	-1.08054	5.58887	-10.2898	1.66606e-10	1.48782e-09	13.7734
73668	Ttc21b	tetratricopeptide repeat domain 21B	-0.883277	5.07526	-10.2894	1.66724e-10	1.48807e-09	13.7671
328968	Carmn	cardiac mesoderm enhancer-associated non-coding RNA	5.91978	-5.34626	10.2866	1.67664e-10	1.49565e-09	11.7227
67393	Cxxc5	CXXC finger 5	2.92173	4.40887	10.3034	1.68294e-10	1.50045e-09	14.0565
17967	Ncam1	neural cell adhesion molecule 1	-2.14943	5.2569	-10.3024	1.68629e-10	1.50262e-09	13.7407
19179	Psmc1	protease (prosome, macropain) 26S subunit, ATPase 1	-0.903929	7.67628	-10.2834	1.68744e-10	1.50282e-09	13.6364
16774	Lama3	laminin, alpha 3	5.33678	6.31345	10.2947	1.71201e-10	1.52388e-09	13.8931
54485	Dll4	delta like canonical Notch ligand 4	4.2128	1.5708	10.2943	1.71346e-10	1.52434e-09	14.1242
228545	Vps18	VPS18 CORVET/HOPS core subunit	1.21289	5.24642	10.2743	1.71821e-10	1.52738e-09	13.8018
13205	Ddx3x	DEAD box helicase 3, X-linked	-1.08443	9.63957	-10.2884	1.71875e-10	1.52738e-09	13.6099
81910	Rrbp1	ribosome binding protein 1	0.977922	9.11724	10.2738	1.7208e-10	1.52838e-09	13.6064
83704	Slc12a9	solute carrier family 12 (potassium/chloride transporters), member 9	1.02815	4.89442	10.2712	1.72891e-10	1.53475e-09	13.767
60507	Qtrt1	queuine tRNA-ribosyltransferase catalytic subunit 1	-1.07032	4.59492	-10.2691	1.73607e-10	1.54026e-09	13.7871
56700	Glmp	glycosylated lysosomal membrane protein	0.787745	7.03377	10.268	1.73984e-10	1.54277e-09	13.6195
70285	Rpf1	ribosome production factor 1 homolog	-1.37964	5.89655	-10.2864	1.74083e-10	1.54282e-09	13.6807
66899	Fip1l1	FIP1 like 1 (S. cerevisiae)	-0.82063	6.70713	-10.267	1.74329e-10	1.54417e-09	13.626
13798	En1	engrailed 1	-6.33792	-0.867459	-10.2802	1.7621e-10	1.55998e-09	13.9429
192654	Pla2g15	phospholipase A2, group XV	1.93023	4.48061	10.2778	1.77052e-10	1.56659e-09	13.7853
21859	Timp3	tissue inhibitor of metalloproteinase 3	-2.61755	7.46024	-10.2766	1.77475e-10	1.56949e-09	13.603
22019	Tpp2	tripeptidyl peptidase II	-0.794856	7.65193	-10.257	1.77847e-10	1.57193e-09	13.5851
72053	Tmub2	transmembrane and ubiquitin-like domain containing 2	0.819028	4.89444	10.2559	1.78243e-10	1.57457e-09	13.7518
72465	Zfp131	zinc finger protein 131	-0.841384	6.08504	-10.2548	1.78649e-10	1.57731e-09	13.6373
227671	Gbgt1	globoside alpha-1,3-N-acetylgalactosaminyltransferase 1	8.44673	-4.08627	10.2679	1.79706e-10	1.58579e-09	11.9734
228355	Madd	MAP-kinase activating death domain	1.83401	4.84005	10.2652	1.81549e-10	1.6009e-09	13.7402
244879	Npat	nuclear protein in the AT region	-0.972444	5.70254	-10.2465	1.81614e-10	1.6009e-09	13.6559
14235	Foxm1	forkhead box M1	-1.5428	6.83375	-10.2597	1.83553e-10	1.61713e-09	13.5822
72692	Hnrnpll	heterogeneous nuclear ribonucleoprotein L-like	-0.995958	6.91623	-10.2393	1.84339e-10	1.62318e-09	13.5581
70120	Yars2	tyrosyl-tRNA synthetase 2 (mitochondrial)	-1.59963	4.80049	-10.2526	1.86187e-10	1.63789e-09	13.6758
56298	Atl2	atlastin GTPase 2	-0.911011	6.14858	-10.234	1.86211e-10	1.63789e-09	13.5955
67379	Dedd2	death effector domain-containing DNA binding protein 2	1.99027	3.73512	10.2477	1.87004e-10	1.64399e-09	13.9435
230815	Man1c1	mannosidase, alpha, class 1C, member 1	3.72165	3.47845	10.2425	1.89957e-10	1.66905e-09	13.9597
17345	Mki67	antigen identified by monoclonal antibody Ki 67	-1.48968	7.98527	-10.2413	1.90431e-10	1.67232e-09	13.5109
76483	Lmf1	lipase maturation factor 1	1.32619	3.10152	10.2175	1.92489e-10	1.68948e-09	13.8749
28006	Washc2	WASH complex subunit 2`	0.908772	6.79444	10.2169	1.92713e-10	1.69055e-09	13.532
69740	Dph5	diphthamide biosynthesis 5	-1.38352	4.1947	-10.2207	1.92966e-10	1.69136e-09	13.7478
66311	Cenpw	centromere protein W	-2.78066	3.32549	-10.2345	1.93012e-10	1.69136e-09	13.8818
70387	Ttc9c	tetratricopeptide repeat domain 9C	-0.786449	6.41346	-10.2129	1.94277e-10	1.70154e-09	13.5315
237253	Lrp11	low density lipoprotein receptor-related protein 11	-1.66637	4.16035	-10.23	1.94744e-10	1.70471e-09	13.7108
12768	Ccr1	chemokine (C-C motif) receptor 1	9.528	1.09526	10.2282	1.95456e-10	1.71003e-09	13.716
434175	Ccnb1-ps	cyclin B1, pseudogene	-2.60217	0.0359951	-10.2053	1.9722e-10	1.72455e-09	13.8087
57434	Xrcc2	X-ray repair complementing defective repair in Chinese hamster cells 2	-0.981787	3.9823	-10.1983	2.00023e-10	1.74812e-09	13.7519
232811	Kmt5c	lysine methyltransferase 5C	1.75196	3.92565	10.216	2.00298e-10	1.74959e-09	13.7134
73420	Ccsap	centriole, cilia and spindle associated protein	-1.32022	2.51568	-10.1966	2.00718e-10	1.75232e-09	13.9072
69878	Snrpf	small nuclear ribonucleoprotein polypeptide F	-2.04923	1.79995	-10.1924	2.02423e-10	1.76378e-09	13.9455
407823	Baz2b	bromodomain adjacent to zinc finger domain, 2B	1.73439	5.34186	10.2106	2.02439e-10	1.76378e-09	13.6053
225115	Svil	supervillin	1.97952	6.41359	10.2105	2.02485e-10	1.76378e-09	13.535
102791	Tcta	T cell leukemia translocation altered gene	1.36017	3.3267	10.1921	2.02517e-10	1.76378e-09	13.8658
71991	Ercc8	excision repaiross-complementing rodent repair deficiency, complementation group 8	-1.37582	3.44091	-10.192	2.02569e-10	1.76378e-09	13.7753
14479	Usp15	ubiquitin specific peptidase 15	-1.10943	6.58147	-10.2029	2.03594e-10	1.77177e-09	13.4697
69256	Zfp397	zinc finger protein 397	1.21958	5.42382	10.1939	2.0457e-10	1.77931e-09	13.5784
268706	Slc38a9	solute carrier family 38, member 9	2.13023	3.16325	10.2044	2.0497e-10	1.78184e-09	13.865
118452	Baalc	brain and acute leukemia, cytoplasmic	-2.20698	1.5204	-10.1802	2.07422e-10	1.80132e-09	13.9385
118451	Mrps2	mitochondrial ribosomal protein S2	-0.848284	5.86005	-10.1802	2.07431e-10	1.80132e-09	13.506
226823	Kctd3	potassium channel tetramerisation domain containing 3	-0.912856	6.02064	-10.1771	2.08715e-10	1.81152e-09	13.4919
71779	Marchf8	membrane associated ring-CH-type finger 8	0.69117	6.13436	10.1763	2.09063e-10	1.81358e-09	13.4552
56358	Copz2	coatomer protein complex, subunit zeta 2	2.37551	1.57625	10.1702	2.11613e-10	1.83473e-09	13.9176
56332	Amotl2	angiomotin-like 2	-1.46025	6.85334	-10.1865	2.12431e-10	1.84085e-09	13.4508
19273	Ptpru	protein tyrosine phosphatase, receptor type, U	-3.89291	-0.28932	-10.1804	2.15058e-10	1.86263e-09	13.905
319660	Agmo	alkylglycerol monooxygenase	7.88696	-4.92643	10.1653	2.15999e-10	1.86978e-09	11.6913
71810	Ranbp3	RAN binding protein 3	-0.763559	7.05242	-10.1594	2.16248e-10	1.87095e-09	13.394
98710	Rabif	RAB interacting factor	-0.751634	5.29897	-10.1575	2.17097e-10	1.8773e-09	13.4863
269060	Dagla	diacylglycerol lipase, alpha	-1.79743	5.25733	-10.1754	2.17232e-10	1.87748e-09	13.4719
108689	Stn1	STN1, CST complex subunit	-0.967016	5.54327	-10.1551	2.18135e-10	1.88429e-09	13.4695
64656	Mrps23	mitochondrial ribosomal protein S23	-1.04589	5.43293	-10.1526	2.19252e-10	1.89294e-09	13.4552
68558	Ankra2	ankyrin repeat, family A (RFXANK-like), 2	1.15488	3.68641	10.1475	2.21525e-10	1.91078e-09	13.7186
20276	Scnn1a	sodium channel, nonvoltage-gated 1 alpha	3.0521	0.932667	10.1474	2.21551e-10	1.91078e-09	13.7556
211652	Wwc1	WW, C2 and coiled-coil domain containing 1	-1.7633	6.95287	-10.1648	2.21871e-10	1.91253e-09	13.3987
19294	Nectin2	nectin cell adhesion molecule 2	1.49009	5.72947	10.1626	2.22852e-10	1.91998e-09	13.48
236604	Pisd-ps1	phosphatidylserine decarboxylase, pseudogene 1	2.00383	1.75486	10.1414	2.24254e-10	1.93103e-09	13.8272
26378	Decr2	2-4-dienoyl-Coenzyme A reductase 2, peroxisomal	1.12507	4.17317	10.1374	2.2603e-10	1.94469e-09	13.6182
69727	Usp46	ubiquitin specific peptidase 46	-0.839308	5.47197	-10.1373	2.26077e-10	1.94469e-09	13.453
210998	Fam91a1	family with sequence similarity 91, member A1	-0.824169	8.2341	-10.1326	2.28236e-10	1.96223e-09	13.3219
20308	Ccl9	chemokine (C-C motif) ligand 9	4.72415	2.77776	10.1457	2.30537e-10	1.98097e-09	13.5043
56207	Uchl5	ubiquitin carboxyl-terminal esterase L5	-1.28598	6.16112	-10.1391	2.33612e-10	2.00547e-09	13.3532
110911	Cds2	CDP-diacylglycerol synthase (phosphatidate cytidylyltransferase) 2	0.989916	7.22261	10.1211	2.33633e-10	2.00547e-09	13.3207
67242	Gemin6	gem nuclear organelle associated protein 6	-1.84766	4.24943	-10.1385	2.33887e-10	2.00607e-09	13.5216
245555	Nexmif	neurite extension and migration factor	-2.89748	2.53731	-10.1383	2.34004e-10	2.00607e-09	13.6622
21915	Dtymk	deoxythymidylate kinase	-1.60182	6.18587	-10.1381	2.3407e-10	2.00607e-09	13.3536
18452	P4ha2	procollagen-proline, 2-oxoglutarate 4-dioxygenase (proline 4-hydroxylase), alpha II polypeptide	1.86789	5.75753	10.1379	2.34197e-10	2.0061e-09	13.4103
67261	2900005J15Rik	RIKEN cDNA 2900005J15 gene	3.01109	0.571972	10.1183	2.34932e-10	2.01135e-09	13.7511
17876	Myef2	myelin basic protein expression factor 2, repressor	-0.92776	6.88792	-10.118	2.35065e-10	2.01144e-09	13.3197
12316	Aspm	abnormal spindle microtubule assembly	-1.52801	5.91796	-10.1355	2.35285e-10	2.01227e-09	13.3737
51801	Ramp1	receptor (calcitonin) activity modifying protein 1	4.15451	2.83233	10.1346	2.35737e-10	2.01508e-09	13.7817
18081	Ninj1	ninjurin 1	1.83562	5.3835	10.1309	2.3748e-10	2.02892e-09	13.4127
69368	Wdfy1	WD repeat and FYVE domain containing 1	1.49049	3.73505	10.1103	2.3871e-10	2.03837e-09	13.619
229898	Gbp5	guanylate binding protein 5	11.2195	-4.15856	10.1271	2.39287e-10	2.04172e-09	11.6849
76509	Plet1	placenta expressed transcript 1	3.38642	3.15801	10.127	2.39352e-10	2.04172e-09	13.7978
12465	Cct5	chaperonin containing Tcp1, subunit 5 (epsilon)	-1.23549	9.49859	-10.1227	2.41419e-10	2.05828e-09	13.2631
104681	Slc16a6	solute carrier family 16 (monocarboxylic acid transporters), member 6	2.48964	3.63673	10.1208	2.42372e-10	2.06533e-09	13.6506
54353	Skap2	src family associated phosphoprotein 2	2.11558	4.83823	10.1153	2.45036e-10	2.08694e-09	13.4223
77652	Zfp955a	zinc finger protein 955A	-1.57045	4.60866	-10.113	2.46192e-10	2.0957e-09	13.4553
223870	Senp1	SUMO1/sentrin specific peptidase 1	-0.957267	6.55725	-10.0931	2.47147e-10	2.10274e-09	13.2798
15115	Hars	histidyl-tRNA synthetase	-0.697144	6.97392	-10.0922	2.47623e-10	2.10561e-09	13.2562
67332	Snrpd3	small nuclear ribonucleoprotein D3	-1.45466	6.63573	-10.1098	2.47755e-10	2.10561e-09	13.2697
16898	Rps2	ribosomal protein S2	-1.70214	9.57129	-10.1096	2.4787e-10	2.10561e-09	13.237
15117	Has2	hyaluronan synthase 2	-2.08894	6.04148	-10.1087	2.48298e-10	2.10815e-09	13.2891
75029	Purg	purine-rich element binding protein G	2.21606	1.16407	10.0895	2.48962e-10	2.1127e-09	13.7491
28199	Dcaf11	DDB1 and CUL4 associated factor 11	0.72554	5.18861	10.0891	2.49152e-10	2.11321e-09	13.3449
230908	Tardbp	TAR DNA binding protein	-0.717459	8.88659	-10.0869	2.50267e-10	2.12157e-09	13.2225
27886	Ess2	ess-2 splicing factor	-0.762853	4.55627	-10.0856	2.50927e-10	2.12607e-09	13.3898
18750	Prkca	protein kinase C, alpha	-1.08015	6.49332	-10.0907	2.5189e-10	2.13312e-09	13.2731
15900	Irf8	interferon regulatory factor 8	8.58733	0.266235	10.0987	2.5335e-10	2.14437e-09	13.1299
14870	Gstp1	glutathione S-transferase, pi 1	-1.22692	6.78476	-10.0952	2.55152e-10	2.1582e-09	13.2327
100637	N4bp2l1	NEDD4 binding protein 2-like 1	4.47013	0.710975	10.095	2.55247e-10	2.1582e-09	13.5237
15374	Jpt1	Jupiter microtubule associated homolog 1	-0.996186	7.87255	-10.0796	2.56436e-10	2.16714e-09	13.2059
19270	Ptprg	protein tyrosine phosphatase, receptor type, G	-2.62473	3.90936	-10.0909	2.57381e-10	2.174e-09	13.509
78829	Tsc22d4	TSC22 domain family, member 4	1.26805	5.94884	10.0904	2.57628e-10	2.17497e-09	13.2847
100198	H6pd	hexose-6-phosphate dehydrogenase (glucose 1-dehydrogenase)	1.51732	6.38343	10.086	2.59932e-10	2.19328e-09	13.2446
54630	Prickle3	prickle planar cell polarity protein 3	2.11025	2.13071	10.0666	2.60746e-10	2.19897e-09	13.7049
215632	Psd4	pleckstrin and Sec7 domain containing 4	2.75202	4.50924	10.0842	2.60874e-10	2.19897e-09	13.4551
27369	Dguok	deoxyguanosine kinase	1.36675	3.43485	10.0611	2.63682e-10	2.22149e-09	13.5458
13194	Ddb1	damage specific DNA binding protein 1	-0.927819	10.3053	-10.0573	2.65694e-10	2.2373e-09	13.1636
72303	Cyp2c65	cytochrome P450, family 2, subfamily c, polypeptide 65	-7.05625	-3.94561	-10.0747	2.65905e-10	2.23792e-09	12.6679
229841	Cenpe	centromere protein E	-1.22918	6.83525	-10.073	2.66812e-10	2.24406e-09	13.1922
13852	Stx2	syntaxin 2	0.874797	4.68961	10.055	2.66908e-10	2.24406e-09	13.2953
19009	Pou6f1	POU domain, class 6, transcription factor 1	2.47042	1.81204	10.051	2.69113e-10	2.26143e-09	13.6807
319581	Xkr5	X-linked Kx blood group related 5	-4.13553	-1.61117	-10.0666	2.70266e-10	2.26995e-09	13.5647
16450	Jag2	jagged 2	-1.62783	5.54132	-10.0652	2.71049e-10	2.27537e-09	13.2345
22773	Zic3	zinc finger protein of the cerebellum 3	-6.42155	-2.42887	-10.0611	2.73312e-10	2.29319e-09	12.8053
18604	Pdk2	pyruvate dehydrogenase kinase, isoenzyme 2	3.08883	1.54414	10.0487	2.74175e-10	2.2983e-09	13.6434
231329	Polr2b	polymerase (RNA) II (DNA directed) polypeptide B	-0.814829	7.33759	-10.0417	2.74202e-10	2.2983e-09	13.1456
20397	Sgpl1	sphingosine phosphate lyase 1	1.13742	7.23386	10.0588	2.74592e-10	2.30039e-09	13.1471
77022	2700099C18Rik	NDC80 homolog, kinetochore complex component pseudogene	-1.65569	3.14941	-10.0508	2.75099e-10	2.30346e-09	13.4768
52357	Wwc2	WW, C2 and coiled-coil domain containing 2	-1.53087	7.15546	-10.0568	2.75677e-10	2.30712e-09	13.1609
100465	Mob3c	MOB kinase activator 3C	1.74569	3.2813	10.0454	2.76867e-10	2.3159e-09	13.5169
14725	Lrp2	low density lipoprotein receptor-related protein 2	-4.38876	0.502051	-10.053	2.7779e-10	2.32243e-09	13.5376
547253	Parp14	poly (ADP-ribose) polymerase family, member 14	9.79548	0.962588	10.0505	2.79211e-10	2.33312e-09	12.9908
100036520	Gata5os	GATA binding protein 5, opposite strand	-4.93926	-5.1338	-10.0311	2.80132e-10	2.33963e-09	12.1898
240913	Adamts4	a disintegrin-like and metallopeptidase (reprolysin type) with thrombospondin type 1 motif, 4	3.70658	2.52126	10.0448	2.82438e-10	2.35756e-09	13.6144
52637	Cisd1	CDGSH iron sulfur domain 1	-1.49201	4.66285	-10.0446	2.82568e-10	2.35756e-09	13.2742
23996	Psmc4	proteasome (prosome, macropain) 26S subunit, ATPase, 4	-0.93033	6.98964	-10.0262	2.82931e-10	2.35939e-09	13.123
225659	Cep76	centrosomal protein 76	-0.760271	4.75202	-10.0241	2.84188e-10	2.36867e-09	13.2662
30928	Zbtb18	zinc finger and BTB domain containing 18	1.06387	5.85619	10.0236	2.84628e-10	2.37112e-09	13.1823
12447	Ccne1	cyclin E1	-1.43424	4.32652	-10.0332	2.84851e-10	2.37178e-09	13.3508
72865	Rtl8c	retrotransposon Gag like 8C	7.1695	-4.98043	10.0193	2.86916e-10	2.38776e-09	11.4512
68910	Zfp467	zinc finger protein 467	3.18087	1.63088	10.0364	2.87238e-10	2.38922e-09	13.5967
12484	Cd24a	CD24a antigen	-1.24554	7.62103	-10.0351	2.88009e-10	2.39442e-09	13.0888
101772	Ano1	anoctamin 1, calcium activated chloride channel	-1.26634	8.00177	-10.0315	2.90088e-10	2.41048e-09	13.0858
380713	Scarf1	scavenger receptor class F, member 1	6.48863	-1.00609	10.0313	2.90256e-10	2.41065e-09	12.9445
26457	Slc27a1	solute carrier family 27 (fatty acid transporter), member 1	1.29122	5.47402	10.0276	2.92413e-10	2.42734e-09	13.1655
233908	Fus	fused in sarcoma	-0.84033	8.60692	-10.0085	2.93277e-10	2.43327e-09	13.062
230721	Pabpc4	poly(A) binding protein, cytoplasmic 4	-1.24792	8.08543	-10.024	2.94542e-10	2.44254e-09	13.0676
17913	Myo1c	myosin IC	-1.05894	8.91318	-10.0188	2.95205e-10	2.44679e-09	13.0577
66245	Hspbp1	HSPA (heat shock 70kDa) binding protein, cytoplasmic cochaperone 1	-1.16359	5.33988	-10.0133	2.95427e-10	2.44739e-09	13.1698
16513	Kcnj10	potassium inwardly-rectifying channel, subfamily J, member 10	8.04085	-3.11123	10.016	2.96535e-10	2.45534e-09	11.6023
59015	Nup160	nucleoporin 160	-1.01	7.29365	-10.0061	2.97289e-10	2.46034e-09	13.0751
67609	4930453N24Rik	RIKEN cDNA 4930453N24 gene	-1.22534	4.75662	-10.0056	3.00366e-10	2.48454e-09	13.1852
73750	Whrn	whirlin	-2.21752	3.65959	-10.0139	3.0064e-10	2.48555e-09	13.446
74360	Cep57	centrosomal protein 57	-1.0807	5.85935	-9.99703	3.02825e-10	2.50236e-09	13.1142
67239	Rpf2	ribosome production factor 2 homolog	-1.72841	5.42574	-10.0071	3.04776e-10	2.5172e-09	13.1323
71675	0610010F05Rik	RIKEN cDNA 0610010F05 gene	-0.89802	5.52133	-9.98924	3.04983e-10	2.51765e-09	13.1029
13885	Esd	esterase D/formylglutathione hydrolase	-1.78205	9.26849	-10.0055	3.05769e-10	2.52287e-09	13.0229
233733	Galnt18	polypeptide N-acetylgalactosaminyltransferase 18	-3.7704	2.21477	-10.0046	3.06357e-10	2.52645e-09	13.501
20850	Stat5a	signal transducer and activator of transcription 5A	2.20494	3.04021	10.0023	3.07775e-10	2.53686e-09	13.4239
723960	Mir24-2	microRNA 24-2	3.18617	0.647613	9.98335	3.08834e-10	2.54431e-09	13.4905
233744	Spon1	spondin 1, (f-spondin) extracellular matrix protein	5.22818	2.05745	9.99784	3.1055e-10	2.55716e-09	13.5443
108673	Ccdc86	coiled-coil domain containing 86	-1.63168	5.7139	-9.99677	3.11222e-10	2.5614e-09	13.0948
54351	Elp5	elongator acetyltransferase complex subunit 5	-1.19058	6.0299	-9.99637	3.11475e-10	2.5622e-09	13.0717
319387	Adgrl3	adhesion G protein-coupled receptor L3	-3.62579	1.46938	-9.99606	3.1167e-10	2.56252e-09	13.5325
108927	Lhfp	lipoma HMGIC fusion partner	-2.42101	4.89365	-9.99392	3.13022e-10	2.57234e-09	13.1524
100042149	Gm3696	predicted gene 3696	-5.1212	-3.88383	-9.976	3.13297e-10	2.57331e-09	12.1186
668572	2610021A01Rik	RIKEN cDNA 2610021A01 gene	-1.22151	4.0024	-9.97329	3.15029e-10	2.58624e-09	13.2263
70699	Nup205	nucleoporin 205	-1.06852	7.39805	-9.98625	3.15291e-10	2.5871e-09	13.0058
170706	Tmem37	transmembrane protein 37	4.5597	1.49227	9.98782	3.16917e-10	2.59913e-09	13.5118
102294	Cyp4v3	cytochrome P450, family 4, subfamily v, polypeptide 3	6.72445	0.802146	9.9874	3.17183e-10	2.60001e-09	13.0955
[truncated: 14,380 more rows]
