# Supplementary material for: Pancreatic tumors exhibit myeloid-driven amino acid stress and upregulate arginine biosynthesis
Source: eLife. 2023 May 31;12:e81289. doi: 10.7554/eLife.81289 (PMC10260022; doi:10.7554/eLife.81289)
Supplement: Figure 1—source data 2. — Normalized enrichment scores (TIFM-RPMI_NES column). Positive NES scores indicate higher enrichment in TIFM cultured cells, negative NES scores indicate enrichment in RPMI. Normalized enrichment scores for the same gene sets are also shown for differential expression analysis of mPDAC3-TIFM cells isolated from orthotopic tumors (in vivo) versus cultured in RPMI (RPMI) (In_vivo-RPMI_NES column). [file elife-81289-fig1-data2.xlsx]

## Sheet: Heatmap_Merge
Top 20 MSigDB gene sets differentially regulated between mPDAC3 cells cultured in TIFM and RPMI (TIFM/RPMI) and the enrichment score of these gene sets comparing mPDAC3 cells from tumors to mPDAC3-RPMI cells (in vivo/RPMI).
MSigDB C2 Gene Set	TIFM-RPMI_NES	TIFM-RPMI_pval	TIFM-RPMI_padj	In_vivo-RPMI_NES	In_vivo-RPMI_pval	In_vivo-RPMI_padj
NIKOLSKY_BREAST_CANCER_20Q12_Q13_AMPLICON	2.26288	1.88494e-05	0.000693726	1.27496	0.0425658	0.0919468
COLDREN_GEFITINIB_RESISTANCE_DN	2.25814	1.83207e-05	0.000693726	1.77834	7.57e-05	0.000439232
CHARAFE_BREAST_CANCER_BASAL_VS_MESENCHYMAL_UP	2.22587	1.87031e-05	0.000693726	1.89358	9.3e-05	0.000516416
CHO_NR4A1_TARGETS	2.19107	1.94292e-05	0.000693726	1.40083	0.0519639	0.108217
ZHANG_RESPONSE_TO_IKK_INHIBITOR_AND_TNF_UP	2.14848	1.83844e-05	0.000693726	2.55661	6.62e-05	0.000405279
DIRMEIER_LMP1_RESPONSE_LATE_UP	2.12799	1.91861e-05	0.000693726	1.17758	0.156019	0.260189
SAGIV_CD24_TARGETS_DN	2.11736	1.93517e-05	0.000693726	1.51183	0.0179846	0.0451045
REACTOME_CELL_JUNCTION_ORGANIZATION	2.07572	1.9192e-05	0.000693726	0.99901	0.453168	0.58581
EINAV_INTERFERON_SIGNATURE_IN_CANCER	2.07451	1.94515e-05	0.000693726	2.90985	2.8e-05	0.000282501
PLASARI_TGFB1_TARGETS_10HR_UP	2.0427	1.84284e-05	0.000693726	1.65124	6.35e-05	0.000398172
AMIT_SERUM_RESPONSE_240_MCF10A	2.01734	1.90295e-05	0.000693726	1.42847	0.0156917	0.0403803
GRAESSMANN_RESPONSE_TO_MC_AND_SERUM_DEPRIVATION_DN	2.00593	1.90433e-05	0.000693726	1.44887	0.011104	0.0302067
NIKOLSKY_BREAST_CANCER_20Q11_AMPLICON	2.00319	7.79135e-05	0.00165422	1.90372	0.000659413	0.00264579
KEGG_RIG_I_LIKE_RECEPTOR_SIGNALING_PATHWAY	1.99238	3.86668e-05	0.00101586	1.89588	0.000380818	0.00163737
KRIGE_AMINO_ACID_DEPRIVATION	1.98958	7.80062e-05	0.00165422	1.28283	0.127183	0.221299
FINETTI_BREAST_CANCER_KINOME_GREEN	1.97081	0.000274418	0.00432575	1.58849	0.0243209	0.0575472
BIOCARTA_CLASSIC_PATHWAY	1.96027	0.00041246	0.00587507	1.93226	0.00146594	0.00533552
RASHI_RESPONSE_TO_IONIZING_RADIATION_2	1.95692	1.87017e-05	0.000693726	2.11163	4.65e-05	0.000324585
REACTOME_CELL_EXTRACELLULAR_MATRIX_INTERACTIONS	1.9508	0.000508597	0.00695132	-0.989135	0.472107	0.603235
BOQUEST_STEM_CELL_CULTURED_VS_FRESH_DN	1.94206	0.000408521	0.00583654	2.26956	2.67e-05	0.000282501
PLASARI_TGFB1_TARGETS_10HR_DN	-2.07495	2.20911e-05	0.000693726	1.26949	0.00944539	0.0263024
REACTOME_EXTENSION_OF_TELOMERES	-2.07583	4.10416e-05	0.00105363	-2.62	1.55e-05	0.000205588
REACTOME_SRP_DEPENDENT_COTRANSLATIONAL_PROTEIN_TARGETING_TO_MEMBRANE	-2.09122	2.11779e-05	0.000693726	-2.58766	1.35e-05	0.000205588
CLASPER_LYMPHATIC_VESSELS_DURING_METASTASIS_DN	-2.09567	2.08446e-05	0.000693726	1.37898	0.0419774	0.0908797
CONCANNON_APOPTOSIS_BY_EPOXOMICIN_DN	-2.10437	2.16511e-05	0.000693726	-1.83342	1.24e-05	0.000205588
ISHIDA_E2F_TARGETS	-2.1162	2.06924e-05	0.000693726	-3.08743	1.5e-05	0.000205588
GOBERT_OLIGODENDROCYTE_DIFFERENTIATION_UP	-2.14072	2.28754e-05	0.000693726	-3.40503	1.06e-05	0.000205588
MISSIAGLIA_REGULATED_BY_METHYLATION_DN	-2.18661	2.12861e-05	0.000693726	-3.28554	1.31e-05	0.000205588
DUTERTRE_ESTRADIOL_RESPONSE_24HR_UP	-2.19813	2.21263e-05	0.000693726	-3.32622	1.14e-05	0.000205588
ZHOU_CELL_CYCLE_GENES_IN_IR_RESPONSE_6HR	-2.2186	2.09428e-05	0.000693726	-3.1618	1.39e-05	0.000205588
REACTOME_INFLUENZA_VIRAL_RNA_TRANSCRIPTION_AND_REPLICATION	-2.23848	2.10793e-05	0.000693726
REACTOME_DNA_STRAND_ELONGATION	-2.24605	2.05554e-05	0.000693726	-2.79802	1.61e-05	0.000205588
PAL_PRMT5_TARGETS_UP	-2.30091	2.1836e-05	0.000693726	-2.67464	1.2e-05	0.000205588
KEGG_DNA_REPLICATION	-2.32603	2.05301e-05	0.000693726	-2.70238	1.6e-05	0.000205588
ZHANG_TLX_TARGETS_36HR_DN	-2.33491	2.18131e-05	0.000693726
REACTOME_PEPTIDE_CHAIN_ELONGATION	-2.34572	2.09266e-05	0.000693726
KEGG_RIBOSOME	-2.35176	2.09266e-05	0.000693726	-2.69212	1.4e-05	0.000205588
MARKEY_RB1_ACUTE_LOF_UP	-2.37173	2.19111e-05	0.000693726	-3.19927	1.18e-05	0.000205588
ZHANG_TLX_TARGETS_DN	-2.4756	2.10318e-05	0.000693726
ZHANG_TLX_TARGETS_60HR_DN	-2.50707	2.19178e-05	0.000693726
