# Supplementary material for: Pancreatic tumors exhibit myeloid-driven amino acid stress and upregulate arginine biosynthesis
Source: eLife. 2023 May 31;12:e81289. doi: 10.7554/eLife.81289 (PMC10260022; doi:10.7554/eLife.81289)
Supplement: Figure 1—source data 3. — Positive NES scores indicate higher enrichment in TIFM cultured cells, negative NES scores indicate enrichment in cells isolated from tumors. [file elife-81289-fig1-data3.xlsx]

## Sheet: Sheet1
GSEA analysis of transcriptomic data from mPDAC3 cells in TIFM and tumors (TIFM/in vivo) using MSigDB C5 (GO term gene sets)
Pathway	pval	padj	ES	NES	nMoreExtreme	size
GO_amide_transport	0.993129	0.994646	0.061428	0.431055	77331	72
GO_peptide_transport	0.991232	0.994263	0.0628165	0.439091	77096	71
GO_protein_transport	0.984565	0.992321	0.0679328	0.468701	76163	68
GO_positive_regulation_of_metabolic_process	0.849755	0.893332	0.0855408	0.688243	70459	125
GO_cell_projection_organization	0.960916	0.978822	0.0904424	0.535781	69971	42
GO_positive_regulation_of_biological_process	0.809761	0.861599	0.0847282	0.731784	69649	193
GO_protein_localization	0.867312	0.904542	0.0895905	0.661937	69129	87
GO_phosphorus_metabolic_process	0.845946	0.890755	0.0888183	0.687391	68826	105
GO_establishment_of_protein_localization	0.853868	0.89622	0.0964914	0.67448	66412	71
GO_positive_regulation_of_nitrogen_compound_metabolic_process	0.810376	0.861599	0.0923539	0.723594	66274	111
GO_phosphate-containing_compound_metabolic_process	0.81421	0.864275	0.0928173	0.716873	66248	104
GO_plasma_membrane_bounded_cell_projection_organization	0.904891	0.935711	0.105071	0.617393	65647	41
GO_positive_regulation_of_cellular_process	0.75921	0.824572	0.0902011	0.775146	65102	185
GO_steroid_metabolic_process	0.978967	0.989526	0.110635	0.499968	65067	20
GO_positive_regulation_of_macromolecule_metabolic_process	0.786569	0.84312	0.0939763	0.743789	64666	116
GO_alcohol_metabolic_process	0.972603	0.98536	0.114152	0.515862	64644	20
GO_macromolecule_modification	0.780383	0.841718	0.09365	0.751119	64628	123
GO_regulation_of_cell_projection_organization	0.92477	0.951981	0.118229	0.591929	63552	26
GO_negative_regulation_of_catabolic_process	0.98627	0.992321	0.117073	0.472932	63428	15
GO_organic_hydroxy_compound_metabolic_process	0.915771	0.944569	0.122817	0.605529	62602	25
GO_cholesterol_metabolic_process	0.966196	0.981153	0.13109	0.529553	62137	15
GO_sterol_metabolic_process	0.966196	0.981153	0.13109	0.529553	62137	15
GO_protein_complex_oligomerization	0.866054	0.904542	0.120713	0.658816	61229	33
GO_positive_regulation_of_cell_development	0.896204	0.931711	0.129119	0.627188	61026	24
GO_secondary_alcohol_metabolic_process	0.941084	0.96011	0.138231	0.57327	61001	16
GO_cell_population_proliferation	0.734029	0.809282	0.103426	0.785632	59183	97
GO_cellular_catabolic_process	0.713051	0.795513	0.110907	0.798758	56119	79
GO_regulation_of_plasma_membrane_bounded_cell_projection_organization	0.80995	0.861599	0.144379	0.711837	55368	25
GO_organophosphate_metabolic_process	0.781245	0.841718	0.134888	0.736174	55233	33
GO_positive_regulation_of_neuron_differentiation	0.856699	0.897754	0.166086	0.670923	55095	15
GO_response_to_abiotic_stimulus	0.7551	0.82349	0.129464	0.760726	54780	41
GO_cell_morphogenesis	0.785967	0.84312	0.146284	0.732393	54013	26
GO_positive_regulation_of_cell_projection_organization	0.81792	0.866811	0.165915	0.704927	53473	17
GO_metabolic_process	0.622061	0.726107	0.105103	0.88249	53286	354
GO_neuron_projection_morphogenesis	0.820547	0.868191	0.17417	0.703581	52770	15
GO_gene_expression	0.613614	0.720692	0.103349	0.889941	52706	188
GO_small_molecule_metabolic_process	0.664117	0.756356	0.118869	0.837949	51836	73
GO_posttranscriptional_regulation_of_gene_expression	0.781412	0.841718	0.166009	0.735706	51630	19
GO_regulation_of_cellular_amide_metabolic_process	0.770123	0.835043	0.165055	0.745897	51186	20
GO_regulation_of_protein_kinase_activity	0.722936	0.802731	0.150595	0.785517	50324	29
GO_cellular_component_disassembly	0.756958	0.82349	0.167508	0.756982	50311	20
GO_positive_regulation_of_catalytic_activity	0.686423	0.775031	0.136693	0.816758	50136	43
GO_organonitrogen_compound_catabolic_process	0.667408	0.758196	0.133313	0.831269	49492	49
GO_regulation_of_translation	0.746346	0.820105	0.189691	0.76628	47998	15
GO_regulation_of_cell_morphogenesis	0.724416	0.802731	0.179686	0.781024	47738	18
GO_epidermis_development	0.732926	0.809282	0.187183	0.776282	47508	16
GO_small_molecule_catabolic_process	0.724256	0.802731	0.188748	0.782773	46946	16
GO_cellular_macromolecule_metabolic_process	0.538295	0.660454	0.107666	0.94746	46786	243
GO_purine_nucleotide_metabolic_process	0.70026	0.785249	0.180968	0.802001	46268	19
GO_purine_ribonucleotide_metabolic_process	0.70026	0.785249	0.180968	0.802001	46268	19
GO_protein-containing_complex_assembly	0.585807	0.696176	0.128007	0.898252	45614	72
GO_regulation_of_cellular_component_organization	0.573892	0.686994	0.124777	0.90982	45403	83
GO_organic_substance_metabolic_process	0.523698	0.649486	0.112282	0.956232	45113	339
GO_organonitrogen_compound_biosynthetic_process	0.589867	0.699733	0.137416	0.893224	44495	56
GO_regulation_of_kinase_activity	0.630098	0.7331	0.160631	0.858301	44235	31
GO_macromolecule_metabolic_process	0.50194	0.633216	0.111218	0.974155	43732	291
GO_organic_substance_catabolic_process	0.554864	0.671569	0.128284	0.923912	43669	79
GO_protein_modification_by_small_protein_conjugation_or_removal	0.638649	0.740202	0.17787	0.849016	43203	23
GO_positive_regulation_of_cytokine_production	0.614126	0.720692	0.188548	0.868948	41038	21
GO_carbohydrate_derivative_metabolic_process	0.540993	0.660454	0.156852	0.929191	39393	42
GO_organic_acid_metabolic_process	0.523747	0.649486	0.155645	0.943955	38485	45
GO_ribose_phosphate_metabolic_process	0.541653	0.660454	0.197007	0.924833	36462	22
GO_protein-containing_complex_subunit_organization	0.456226	0.593818	0.137963	1.00338	36076	82
GO_negative_regulation_of_cellular_component_organization	0.505389	0.635125	0.177256	0.957552	35590	32
GO_regulation_of_transferase_activity	0.492491	0.624901	0.170484	0.967666	35284	37
GO_cellular_component_morphogenesis	0.540782	0.660454	0.223332	0.926198	35053	16
GO_cell_part_morphogenesis	0.540782	0.660454	0.223332	0.926198	35053	16
GO_cell_projection_morphogenesis	0.540782	0.660454	0.223332	0.926198	35053	16
GO_plasma_membrane_bounded_cell_projection_morphogenesis	0.540782	0.660454	0.223332	0.926198	35053	16
GO_biological_process	0.48904	0.622932	0.193183	1.00657	35047	478
GO_oxoacid_metabolic_process	0.473327	0.606503	0.163439	0.984299	34700	44
GO_positive_regulation_of_protein_transport	0.50661	0.635443	0.203015	0.953038	34103	22
GO_tissue_morphogenesis	0.988771	0.993313	-0.100063	-0.503015	33723	18
GO_positive_regulation_of_cellular_component_biogenesis	0.932343	0.954161	-0.134464	-0.620682	33279	15
GO_peptide_metabolic_process	0.470198	0.604804	0.180405	0.984591	33242	33
GO_modification-dependent_protein_catabolic_process	0.49891	0.630607	0.216404	0.959043	32964	19
GO_embryonic_morphogenesis	0.936702	0.957129	-0.125786	-0.615597	32437	17
GO_positive_regulation_of_establishment_of_protein_localization	0.473368	0.606503	0.20188	0.980621	32233	24
GO_peptidyl-tyrosine_phosphorylation	0.905476	0.935711	-0.136201	-0.648092	31860	16
GO_peptidyl-tyrosine_modification	0.905476	0.935711	-0.136201	-0.648092	31860	16
GO_cellular_metabolic_process	0.36566	0.503935	0.125327	1.08168	31663	321
GO_ribonucleotide_metabolic_process	0.469689	0.604804	0.213774	0.985206	31386	21
GO_regulation_of_binding	0.927217	0.951981	-0.118924	-0.628946	31096	20
GO_morphogenesis_of_an_epithelium	0.863202	0.903127	-0.149385	-0.689556	30811	15
GO_nitrogen_compound_metabolic_process	0.352233	0.491627	0.125637	1.09322	30607	308
GO_positive_regulation_of_organelle_organization	0.985489	0.992321	-0.0871514	-0.5282	30492	27
GO_carboxylic_acid_metabolic_process	0.416342	0.555122	0.172824	1.03264	30409	43
GO_positive_regulation_of_secretion	0.45336	0.59126	0.220671	0.997228	30132	20
GO_positive_regulation_of_secretion_by_cell	0.45336	0.59126	0.220671	0.997228	30132	20
GO_regulation_of_neuron_projection_development	0.905756	0.935711	-0.12043	-0.651586	30052	21
GO_primary_metabolic_process	0.345086	0.485787	0.127067	1.09954	29909	317
GO_RNA_metabolic_process	0.354039	0.493099	0.132083	1.092	29745	144
GO_protein_modification_by_small_protein_conjugation	0.432024	0.567951	0.220556	1.01646	28869	21
GO_nucleoside_phosphate_metabolic_process	0.416144	0.555122	0.208898	1.02993	28447	25
GO_ubiquitin-dependent_protein_catabolic_process	0.420349	0.557069	0.23616	1.0265	27700	18
GO_positive_regulation_of_kinase_activity	0.415943	0.555122	0.232613	1.03088	27482	19
GO_regulation_of_cell_development	0.931304	0.954161	-0.0941519	-0.632814	27018	34
GO_protein_homooligomerization	0.78019	0.841718	-0.143597	-0.75943	26165	20
GO_cellular_process	0.331484	0.472073	0.163308	1.11095	26115	441
GO_peptidyl-serine_phosphorylation	0.750505	0.821922	-0.159046	-0.778376	25989	17
GO_peptidyl-serine_modification	0.750505	0.821922	-0.159046	-0.778376	25989	17
GO_cellular_localization	0.325747	0.470683	0.15127	1.11765	25963	87
GO_proteasomal_protein_catabolic_process	0.727161	0.804414	-0.171674	-0.792439	25955	15
GO_neuron_projection_development	0.870088	0.905996	-0.107738	-0.694535	25925	31
GO_neurogenesis	0.973344	0.98536	-0.0730088	-0.568125	25267	48
GO_positive_regulation_of_cellular_component_organization	0.927311	0.951981	-0.0850263	-0.63865	24748	44
GO_regulation_of_cytoskeleton_organization	0.358133	0.496937	0.216584	1.08436	24611	26
GO_cellular_protein-containing_complex_assembly	0.340978	0.482072	0.199776	1.10247	24205	34
GO_multi-organism_reproductive_process	0.363562	0.502098	0.243611	1.07962	24021	19
GO_regulation_of_neuron_differentiation	0.754978	0.82349	-0.132827	-0.778647	23888	25
GO_regulation_of_intracellular_transport	0.683685	0.773271	-0.168646	-0.825356	23675	17
GO_reproductive_structure_development	0.658384	0.752438	-0.181768	-0.839034	23500	15
GO_reproductive_system_development	0.658384	0.752438	-0.181768	-0.839034	23500	15
GO_response_to_radiation	0.35831	0.496937	0.261655	1.08513	23225	16
GO_cellular_amide_metabolic_process	0.309575	0.458423	0.180615	1.13466	23028	50
GO_carbohydrate_derivative_biosynthetic_process	0.343883	0.485134	0.238132	1.09746	22979	21
GO_lipid_biosynthetic_process	0.668045	0.758196	-0.166415	-0.836561	22784	18
GO_cellular_macromolecule_catabolic_process	0.311168	0.459743	0.18941	1.13175	22727	43
GO_viral_process	0.631405	0.7331	-0.185952	-0.858348	22537	15
GO_nucleotide_metabolic_process	0.330876	0.472073	0.228714	1.11096	22530	24
GO_negative_regulation_of_catalytic_activity	0.674714	0.764442	-0.154293	-0.834803	22386	21
GO_cell_morphogenesis_involved_in_neuron_differentiation	0.621992	0.726107	-0.187629	-0.866088	22201	15
GO_organic_anion_transport	0.613083	0.720692	-0.188845	-0.871699	21883	15
GO_cell_morphogenesis_involved_in_differentiation	0.630754	0.7331	-0.175983	-0.861267	21842	17
GO_drug_metabolic_process	0.322738	0.469759	0.242891	1.11939	21566	21
GO_positive_regulation_of_neurogenesis	0.655083	0.751284	-0.15359	-0.848599	21413	22
GO_protein_ubiquitination	0.320901	0.468844	0.247955	1.12053	21328	20
GO_generation_of_neurons	0.798082	0.854064	-0.101017	-0.758762	21299	44
GO_energy_derivation_by_oxidation_of_organic_compounds	0.605025	0.715557	-0.184167	-0.876333	21288	16
GO_positive_regulation_of_protein_kinase_activity	0.324283	0.469759	0.262711	1.11618	21200	17
GO_regulation_of_establishment_of_protein_localization	0.756337	0.82349	-0.108152	-0.788597	20765	41
GO_nitrogen_compound_transport	0.994889	0.994889	-0.049887	-0.482084	20634	84
GO_axon_development	0.578594	0.690105	-0.188017	-0.894648	20358	16
GO_regulation_of_intracellular_protein_transport	0.57008	0.686188	-0.19522	-0.901129	20348	15
GO_small_molecule_biosynthetic_process	0.298407	0.444897	0.235544	1.14414	20319	24
GO_neuron_development	0.693024	0.7798	-0.123308	-0.828777	20105	34
GO_ameboidal-type_cell_migration	0.562908	0.680051	-0.196192	-0.905615	20092	15
GO_anion_transport	0.575715	0.687921	-0.183789	-0.899466	19936	17
GO_central_nervous_system_development	0.605525	0.715557	-0.159292	-0.880102	19793	22
GO_cellular_macromolecule_localization	0.259068	0.398006	0.178801	1.18822	19733	60
GO_positive_regulation_of_nervous_system_development	0.606478	0.715557	-0.156305	-0.881569	19621	23
GO_regulation_of_cellular_localization	0.710264	0.795107	-0.11235	-0.819205	19500	41
GO_cellular_protein_localization	0.251963	0.392608	0.18301	1.19676	19057	57
GO_positive_regulation_of_biosynthetic_process	0.840708	0.886663	-0.0814045	-0.728282	19036	68
GO_synaptic_signaling	0.539432	0.660454	-0.194045	-0.923334	18980	16
GO_positive_regulation_of_nucleobase-containing_compound_metabolic_process	0.822119	0.868454	-0.0835222	-0.74319	18754	67
GO_positive_regulation_of_transferase_activity	0.273636	0.414043	0.237682	1.17185	18705	25
GO_urogenital_system_development	0.281291	0.423226	0.262514	1.16339	18585	19
GO_positive_regulation_of_cellular_biosynthetic_process	0.806996	0.861599	-0.0854956	-0.756834	18547	66
GO_nervous_system_development	0.783838	0.842947	-0.0890603	-0.773435	18293	63
GO_positive_regulation_of_protein_modification_process	0.68963	0.777315	-0.110061	-0.834561	18288	45
GO_regulation_of_protein_localization	0.718163	0.799856	-0.102149	-0.815343	18282	51
GO_actin_cytoskeleton_organization	0.571234	0.686318	-0.154687	-0.906796	18074	25
GO_positive_regulation_of_peptide_secretion	0.270381	0.411802	0.2767	1.17562	17676	17
GO_positive_regulation_of_protein_secretion	0.270381	0.411802	0.2767	1.17562	17676	17
GO_positive_regulation_of_macromolecule_biosynthetic_process	0.742176	0.816892	-0.0926369	-0.800793	17429	62
GO_modification-dependent_macromolecule_catabolic_process	0.260795	0.399723	0.262468	1.18611	17333	20
GO_regulation_of_neurogenesis	0.56728	0.684072	-0.143215	-0.910313	17090	30
GO_intracellular_transport	0.229634	0.370123	0.196306	1.22406	17028	49
GO_in_utero_embryonic_development	0.251527	0.392608	0.264934	1.19726	16717	20
GO_positive_regulation_of_RNA_biosynthetic_process	0.654724	0.751284	-0.106701	-0.857948	16574	52
GO_positive_regulation_of_nucleic_acid-templated_transcription	0.654724	0.751284	-0.106701	-0.857948	16574	52
GO_intrinsic_apoptotic_signaling_pathway	0.468127	0.604511	-0.204852	-0.974757	16471	16
GO_nucleobase-containing_small_molecule_metabolic_process	0.234256	0.375725	0.233044	1.21558	16306	29
GO_developmental_process_involved_in_reproduction	0.23943	0.378473	0.249708	1.21294	16303	24
GO_regulation_of_organelle_organization	0.216454	0.35147	0.192319	1.23713	16272	54
GO_neuron_differentiation	0.583819	0.695073	-0.125173	-0.902796	16141	40
GO_negative_regulation_of_molecular_function	0.55415	0.671569	-0.137091	-0.921414	16076	34
GO_regulation_of_peptidase_activity	0.450007	0.589231	-0.213847	-0.987107	16062	15
GO_positive_regulation_of_RNA_metabolic_process	0.660679	0.753748	-0.101072	-0.855565	15850	59
GO_embryo_development_ending_in_birth_or_egg_hatching	0.22853	0.369251	0.240717	1.22324	15782	27
GO_chordate_embryonic_development	0.22853	0.369251	0.240717	1.22324	15782	27
GO_regulation_of_nervous_system_development	0.529584	0.655485	-0.145265	-0.936453	15779	31
GO_regulation_of_cellular_protein_localization	0.511935	0.639675	-0.15371	-0.947976	15719	28
GO_negative_regulation_of_apoptotic_process	0.55173	0.67025	-0.131313	-0.926738	15512	38
GO_regulation_of_cellular_response_to_stress	0.517541	0.644226	-0.142818	-0.947561	15164	33
GO_head_development	0.427061	0.564823	-0.211595	-1.00684	15026	16
GO_regulation_of_catalytic_activity	0.645797	0.747166	-0.098009	-0.867606	14842	66
GO_ion_transmembrane_transport	0.428856	0.565208	-0.200178	-1.00628	14626	18
GO_mitochondrion_organization	0.409413	0.552485	-0.220845	-1.01941	14613	15
GO_transmembrane_receptor_protein_serine/threonine_kinase_signaling_pathway	0.406584	0.551072	-0.22135	-1.02174	14512	15
GO_regulation_of_cellular_component_biogenesis	0.460648	0.597204	-0.16491	-0.983743	14409	26
GO_animal_organ_morphogenesis	0.458187	0.595189	-0.165306	-0.986101	14332	26
GO_multi-organism_process	0.21262	0.346101	0.275434	1.24471	14131	20
GO_covalent_chromatin_modification	0.416109	0.555122	-0.197335	-1.01846	14118	19
GO_anatomical_structure_formation_involved_in_morphogenesis	0.482827	0.617416	-0.142892	-0.972277	13874	35
GO_negative_regulation_of_cellular_protein_metabolic_process	0.503351	0.633778	-0.131455	-0.958515	13819	41
GO_protein_phosphorylation	0.617109	0.722899	-0.0984169	-0.888887	13763	70
GO_regulation_of_protein_transport	0.487972	0.622781	-0.135626	-0.967401	13610	39
GO_positive_regulation_of_molecular_function	0.549022	0.668198	-0.110415	-0.92808	13276	58
GO_positive_regulation_of_phosphorylation	0.491655	0.624901	-0.129947	-0.967093	13255	43
GO_symbiotic_process	0.377361	0.51897	-0.214145	-1.04803	13067	17
GO_positive_regulation_of_transcription,_DNA-templated	0.510449	0.639035	-0.119651	-0.955037	12994	51
GO_organic_cyclic_compound_catabolic_process	0.196462	0.327103	0.28622	1.26845	12980	19
GO_peptidyl-amino_acid_modification	0.46801	0.604511	-0.136311	-0.983128	12939	40
GO_regulation_of_protein_modification_process	0.572491	0.68657	-0.102084	-0.916859	12856	69
GO_purine-containing_compound_metabolic_process	0.187896	0.316864	0.268134	1.27986	12710	23
GO_organic_substance_transport	0.654416	0.751284	-0.0859458	-0.871178	12677	97
GO_positive_regulation_of_cellular_metabolic_process	0.712231	0.795513	-0.0776125	-0.833142	12629	117
GO_regulation_of_protein_serine/threonine_kinase_activity	0.388354	0.531859	-0.180874	-1.039	12391	24
GO_macromolecule_localization	0.654579	0.751284	-0.0840828	-0.873688	12201	105
GO_negative_regulation_of_protein_modification_process	0.384205	0.527277	-0.177905	-1.0429	12156	25
GO_reproduction	0.166177	0.28612	0.226494	1.30876	11982	39
GO_regulation_of_mitotic_cell_cycle_phase_transition	0.181957	0.309233	0.303387	1.289	11895	17
GO_establishment_of_localization_in_cell	0.147978	0.261894	0.195307	1.33477	11396	66
GO_regulation_of_apoptotic_signaling_pathway	0.327953	0.471792	-0.223213	-1.09241	11356	17
GO_positive_regulation_of_protein_phosphorylation	0.410153	0.552485	-0.139295	-1.02604	11149	42
GO_Ras_protein_signal_transduction	0.330193	0.472073	-0.205725	-1.088	11073	20
GO_macromolecule_catabolic_process	0.148114	0.261894	0.212048	1.33931	11040	51
GO_reproductive_process	0.151089	0.263601	0.232886	1.33394	10860	38
GO_small_GTPase_mediated_signal_transduction	0.319892	0.468413	-0.203164	-1.09922	10613	21
GO_histone_modification	0.306468	0.454849	-0.227531	-1.11354	10612	17
GO_positive_regulation_of_phosphorus_metabolic_process	0.400113	0.544552	-0.136126	-1.03221	10610	45
GO_positive_regulation_of_phosphate_metabolic_process	0.400113	0.544552	-0.136126	-1.03221	10610	45
GO_oxidation-reduction_process	0.405642	0.550934	-0.133248	-1.0281	10596	47
GO_regulation_of_ERK1_and_ERK2_cascade	0.316637	0.465725	-0.203842	-1.10289	10505	21
GO_positive_regulation_of_cellular_protein_metabolic_process	0.429076	0.565208	-0.121089	-1.01179	10453	57
GO_translation	0.150939	0.263601	0.266511	1.33432	10372	26
GO_regulation_of_protein_secretion	0.324391	0.469759	-0.190232	-1.09275	10350	24
GO_chromatin_organization	0.323873	0.469759	-0.186816	-1.09514	10247	25
GO_regulation_of_cellular_protein_metabolic_process	0.51722	0.644226	-0.0956349	-0.959199	10151	94
GO_proteolysis_involved_in_cellular_protein_catabolic_process	0.327354	0.471792	-0.179825	-1.08987	10128	27
GO_regulation_of_actin_cytoskeleton_organization	0.284025	0.42539	-0.239483	-1.13954	9993	16
GO_regulation_of_actin_filament-based_process	0.284025	0.42539	-0.239483	-1.13954	9993	16
GO_actin_filament-based_process	0.31459	0.463755	-0.184581	-1.10109	9840	26
GO_lymphocyte_activation	0.290808	0.434555	-0.208506	-1.12812	9648	21
GO_negative_regulation_of_programmed_cell_death	0.350561	0.491297	-0.146789	-1.07032	9624	41
GO_sexual_reproduction	0.147498	0.261894	0.323329	1.3409	9560	16
GO_embryo_development	0.128732	0.237214	0.231597	1.37198	9373	42
GO_cellular_response_to_DNA_damage_stimulus	0.128395	0.237214	0.242124	1.3743	9198	37
GO_regulation_of_peptide_transport	0.331838	0.472073	-0.150746	-1.08724	9174	40
GO_negative_regulation_of_intracellular_signal_transduction	0.270559	0.411802	-0.216719	-1.14615	9073	20
GO_cellular_response_to_drug	0.252837	0.393035	-0.253415	-1.16975	9024	15
GO_negative_regulation_of_protein_metabolic_process	0.332466	0.472073	-0.143342	-1.08693	8816	45
GO_cell_development	0.361537	0.500355	-0.125874	-1.06552	8673	59
GO_striated_muscle_tissue_development	0.238101	0.37728	-0.257088	-1.18671	8498	15
GO_muscle_tissue_development	0.238101	0.37728	-0.257088	-1.18671	8498	15
GO_positive_regulation_of_gene_expression	0.389192	0.531895	-0.113316	-1.04456	8497	74
GO_regulation_of_protein_catabolic_process	0.242969	0.382224	-0.24161	-1.18245	8413	17
GO_positive_regulation_of_cell_cycle	0.120079	0.225062	0.273921	1.39197	8292	27
GO_positive_regulation_of_protein_metabolic_process	0.339474	0.480982	-0.125833	-1.08121	8052	61
GO_behavior	0.251214	0.392608	-0.203	-1.1661	8015	24
GO_regulation_of_phosphate_metabolic_process	0.351247	0.491297	-0.1206	-1.07311	8012	67
GO_regulation_of_phosphorus_metabolic_process	0.351247	0.491297	-0.1206	-1.07311	8012	67
GO_response_to_drug	0.258899	0.398006	-0.187446	-1.15603	7949	28
GO_cellular_component_assembly	0.0969977	0.189376	0.18298	1.41917	7895	106
GO_peptide_biosynthetic_process	0.110102	0.207549	0.277649	1.41091	7603	27
GO_cellular_protein_modification_process	0.418273	0.55544	-0.0966189	-1.02824	7484	114
GO_protein_modification_process	0.418273	0.55544	-0.0966189	-1.02824	7484	114
GO_positive_regulation_of_transcription_by_RNA_polymerase_II	0.247833	0.388944	-0.176404	-1.17039	7261	33
GO_regulation_of_chromosome_organization	0.108741	0.206432	0.325628	1.41538	7165	18
GO_cell_adhesion	0.237819	0.37728	-0.185425	-1.17861	7164	30
GO_biological_adhesion	0.237819	0.37728	-0.185425	-1.17861	7164	30
GO_G_protein-coupled_receptor_signaling_pathway	0.209546	0.341946	-0.2433	-1.22306	7146	18
GO_regulation_of_anatomical_structure_size	0.208286	0.340737	-0.243711	-1.22513	7103	18
GO_organophosphate_biosynthetic_process	0.108807	0.206432	0.340632	1.41266	7052	16
GO_muscle_structure_development	0.207156	0.339735	-0.237282	-1.22463	7028	19
GO_regulation_of_apoptotic_process	0.30469	0.453235	-0.125564	-1.11153	7002	66
GO_positive_regulation_of_apoptotic_process	0.255063	0.394625	-0.158771	-1.15769	7002	41
GO_positive_regulation_of_programmed_cell_death	0.255063	0.394625	-0.158771	-1.15769	7002	41
GO_phosphorylation	0.33108	0.472073	-0.114613	-1.0916	6953	81
GO_biosynthetic_process	0.493832	0.625394	-0.0813784	-0.980456	6925	191
GO_multicellular_organism_reproduction	0.105398	0.202167	0.342536	1.42056	6831	16
GO_multicellular_organismal_reproductive_process	0.105398	0.202167	0.342536	1.42056	6831	16
GO_negative_regulation_of_organelle_organization	0.102519	0.198971	0.316311	1.42943	6813	20
GO_positive_regulation_of_cell_population_proliferation	0.24214	0.381836	-0.16419	-1.17115	6753	39
GO_cell_junction_organization	0.188592	0.317222	-0.263637	-1.25447	6635	16
GO_regulation_of_protein_phosphorylation	0.273925	0.414043	-0.134949	-1.14233	6571	59
GO_regulation_of_phosphorylation	0.276985	0.417707	-0.131495	-1.1367	6504	62
GO_cellular_protein_metabolic_process	0.415317	0.555122	-0.0898315	-1.03074	6485	151
GO_negative_regulation_of_phosphorus_metabolic_process	0.192498	0.32132	-0.234737	-1.24143	6455	20
GO_negative_regulation_of_phosphate_metabolic_process	0.192498	0.32132	-0.234737	-1.24143	6455	20
GO_organic_substance_biosynthetic_process	0.436107	0.572172	-0.0846101	-1.01618	6200	186
GO_epithelial_cell_proliferation	0.183966	0.311839	-0.231112	-1.25043	6103	21
GO_protein_secretion	0.198447	0.327912	-0.195975	-1.22711	6030	29
GO_establishment_of_protein_localization_to_extracellular_region	0.198447	0.327912	-0.195975	-1.22711	6030	29
GO_protein_localization_to_extracellular_region	0.198447	0.327912	-0.195975	-1.22711	6030	29
GO_regulation_of_peptide_secretion	0.190601	0.319781	-0.2113	-1.23867	6030	25
GO_regulation_of_cell_cycle_phase_transition	0.0908073	0.182955	0.328191	1.45445	5999	19
GO_proteolysis	0.236649	0.37728	-0.146521	-1.17813	5990	52
GO_sensory_organ_development	0.172971	0.295493	-0.260538	-1.27508	5989	17
GO_cellular_biosynthetic_process	0.408785	0.552485	-0.0864164	-1.03497	5825	184
GO_homeostasis_of_number_of_cells	0.159546	0.276154	-0.281035	-1.29725	5694	15
GO_aromatic_compound_catabolic_process	0.0861146	0.177088	0.344696	1.46452	5629	17
GO_generation_of_precursor_metabolites_and_energy	0.166968	0.28673	-0.23573	-1.27542	5539	21
GO_catabolic_process	0.271671	0.412538	-0.113925	-1.13885	5355	93
GO_intracellular_protein_transport	0.074692	0.156543	0.268613	1.49703	5322	35
GO_regulation_of_cell_adhesion	0.154074	0.267388	-0.259831	-1.30616	5254	18
GO_positive_regulation_of_ERK1_and_ERK2_cascade	0.153341	0.266821	-0.260051	-1.30726	5229	18
GO_cellular_response_to_endogenous_stimulus	0.202077	0.332237	-0.154032	-1.21767	5175	50
GO_response_to_toxic_substance	0.142569	0.257645	-0.287021	-1.32488	5088	15
GO_regulation_of_DNA-binding_transcription_factor_activity	0.143893	0.258782	-0.270104	-1.3219	4982	17
GO_negative_regulation_of_phosphorylation	0.144381	0.258782	-0.255177	-1.31698	4898	19
GO_macromolecule_biosynthetic_process	0.317452	0.46588	-0.0951695	-1.10322	4883	156
GO_reactive_oxygen_species_metabolic_process	0.140832	0.255916	-0.271249	-1.3275	4876	17
GO_actin_filament_organization	0.140235	0.25554	-0.26434	-1.32882	4782	18
GO_ERK1_and_ERK2_cascade	0.145546	0.260159	-0.232575	-1.31173	4708	23
GO_skeletal_system_development	0.133316	0.244289	-0.28237	-1.34362	4690	16
GO_response_to_hypoxia	0.127217	0.235746	-0.293239	-1.35358	4540	15
GO_response_to_decreased_oxygen_levels	0.127217	0.235746	-0.293239	-1.35358	4540	15
GO_response_to_oxygen_levels	0.127217	0.235746	-0.293239	-1.35358	4540	15
GO_regulation_of_proteolysis	0.144236	0.258782	-0.219792	-1.31113	4511	26
GO_cellular_nitrogen_compound_catabolic_process	0.0692522	0.148949	0.364525	1.51175	4488	16
GO_heterocycle_catabolic_process	0.0692522	0.148949	0.364525	1.51175	4488	16
GO_regulation_of_hydrolase_activity	0.150816	0.263601	-0.197624	-1.29374	4460	32
GO_cellular_protein_catabolic_process	0.147139	0.261894	-0.2047	-1.30113	4432	30
GO_negative_regulation_of_cell_population_proliferation	0.14999	0.263601	-0.195576	-1.29759	4394	33
GO_regulation_of_protein_metabolic_process	0.230683	0.370901	-0.114028	-1.18009	4298	104
GO_positive_regulation_of_proteolysis	0.122206	0.228397	-0.27876	-1.36426	4231	17
GO_cellular_response_to_stress	0.199057	0.328094	-0.125288	-1.21493	4094	85
GO_cellular_macromolecule_biosynthetic_process	0.256974	0.396647	-0.0998072	-1.15132	3997	153
GO_cellular_response_to_organic_cyclic_compound	0.115913	0.217877	-0.252905	-1.36835	3845	21
GO_regulation_of_molecular_function	0.186588	0.315469	-0.125944	-1.22973	3786	87
GO_cation_transmembrane_transport	0.104693	0.202167	-0.303766	-1.40217	3736	15
GO_negative_regulation_of_protein_phosphorylation	0.105374	0.202167	-0.277766	-1.39632	3593	18
GO_autophagy	0.096996	0.189376	-0.298045	-1.4182	3412	16
GO_process_utilizing_autophagic_mechanism	0.096996	0.189376	-0.298045	-1.4182	3412	16
GO_nervous_system_process	0.108881	0.206432	-0.230986	-1.3779	3405	26
GO_circulatory_system_process	0.0938507	0.186	-0.309528	-1.42877	3349	15
GO_blood_circulation	0.0938507	0.186	-0.309528	-1.42877	3349	15
GO_neuron_apoptotic_process	0.0950919	0.187893	-0.299001	-1.42275	3345	16
GO_cell-cell_adhesion	0.0898932	0.182025	-0.293467	-1.43623	3112	17
GO_membrane_organization	0.0909198	0.182955	-0.284262	-1.42897	3100	18
GO_movement_of_cell_or_subcellular_component	0.136769	0.249918	-0.146589	-1.31145	3096	68
GO_regulation_of_programmed_cell_death	0.129262	0.237523	-0.147913	-1.3233	2926	68
GO_establishment_of_localization	0.177001	0.301591	-0.110058	-1.23371	2905	137
GO_regulation_of_cytokine_production	0.0956917	0.18851	-0.220697	-1.40281	2882	30
GO_negative_regulation_of_cell_death	0.108597	0.206432	-0.17947	-1.36088	2879	45
GO_response_to_growth_factor	0.0930127	0.18546	-0.23272	-1.41045	2877	27
GO_cellular_response_to_growth_factor_stimulus	0.0930127	0.18546	-0.23272	-1.41045	2877	27
GO_apoptotic_process	0.14135	0.256149	-0.131512	-1.29051	2867	88
GO_response_to_nutrient_levels	0.0818366	0.169353	-0.298247	-1.45963	2833	17
GO_positive_regulation_of_catabolic_process	0.0842375	0.173773	-0.267123	-1.44527	2794	21
GO_nucleobase-containing_compound_catabolic_process	0.0428069	0.0995793	0.398495	1.60977	2752	15
GO_peptide_secretion	0.0913515	0.183262	-0.219088	-1.41236	2721	31
GO_positive_regulation_of_hydrolase_activity	0.0807715	0.167678	-0.269257	-1.45682	2679	21
GO_positive_regulation_of_cell_cycle_process	0.039819	0.0936246	0.365529	1.61993	2630	19
GO_response_to_endogenous_stimulus	0.110067	0.207549	-0.157899	-1.35673	2610	61
GO_cellular_nitrogen_compound_biosynthetic_process	0.162921	0.281253	-0.10965	-1.24942	2587	146
GO_regulation_of_MAP_kinase_activity	0.0719989	0.153348	-0.322872	-1.49036	2569	15
GO_protein_catabolic_process	0.0886297	0.181125	-0.204297	-1.40865	2537	36
GO_cellular_response_to_biotic_stimulus	0.0726826	0.153465	-0.303815	-1.48688	2516	17
GO_regulation_of_catabolic_process	0.0899025	0.182025	-0.190495	-1.40318	2443	42
GO_organonitrogen_compound_metabolic_process	0.171478	0.293707	-0.101128	-1.23005	2363	204
GO_regulation_of_neuron_death	0.0680505	0.147331	-0.297157	-1.4938	2320	18
GO_cellular_response_to_organonitrogen_compound	0.0729173	0.153465	-0.246678	-1.47151	2280	26
GO_cellular_response_to_nitrogen_compound	0.0729173	0.153465	-0.246678	-1.47151	2280	26
GO_response_to_organonitrogen_compound	0.0783978	0.163267	-0.20846	-1.43736	2244	36
GO_response_to_nitrogen_compound	0.0783978	0.163267	-0.20846	-1.43736	2244	36
GO_response_to_inorganic_substance	0.0698549	0.149266	-0.258171	-1.48301	2228	24
GO_cell-cell_signaling	0.0880471	0.180497	-0.174906	-1.40636	2228	52
GO_response_to_wounding	0.0666968	0.144878	-0.277082	-1.49916	2212	21
GO_localization	0.15086	0.263601	-0.105543	-1.25962	2183	179
GO_regulation_of_intracellular_signal_transduction	0.0897479	0.182025	-0.162613	-1.39724	2128	61
GO_response_to_organic_cyclic_compound	0.0695601	0.149122	-0.23602	-1.47785	2113	29
GO_response_to_extracellular_stimulus	0.0621087	0.136265	-0.286883	-1.51721	2082	20
GO_mRNA_processing	0.0319847	0.0773334	0.411535	1.66245	2056	15
GO_amide_biosynthetic_process	0.0290665	0.0711314	0.307992	1.68092	2054	33
GO_immune_system_development	0.0729895	0.153465	-0.198743	-1.44914	2003	41
GO_cell_growth	0.0578111	0.127838	-0.313503	-1.53429	2001	17
GO_response_to_metal_ion	0.0550679	0.122873	-0.315757	-1.54532	1906	17
GO_response_to_peptide_hormone	0.0532299	0.121246	-0.327263	-1.55723	1872	16
GO_cellular_response_to_molecule_of_bacterial_origin	0.0514358	0.117567	-0.339114	-1.56533	1835	15
GO_cellular_response_to_lipopolysaccharide	0.0514358	0.117567	-0.339114	-1.56533	1835	15
GO_alpha-amino_acid_metabolic_process	0.0277616	0.0690211	0.397318	1.68809	1814	17
GO_neuron_death	0.0534916	0.121364	-0.294033	-1.55503	1793	20
GO_negative_regulation_of_neuron_death	0.0475977	0.109558	-0.343079	-1.58364	1698	15
GO_transmembrane_transport	0.0571633	0.127116	-0.227145	-1.50705	1674	33
GO_transport	0.10006	0.194775	-0.121525	-1.34688	1672	131
GO_cellular_response_to_cytokine_stimulus	0.0640216	0.139529	-0.189065	-1.47123	1661	48
GO_supramolecular_fiber_organization	0.053837	0.121364	-0.24003	-1.52569	1621	30
GO_regulation_of_MAPK_cascade	0.05415	0.121652	-0.226303	-1.52103	1570	34
GO_positive_regulation_of_transport	0.0537019	0.121364	-0.226538	-1.52261	1557	34
GO_protein_localization_to_nucleus	0.0232099	0.0594354	0.372811	1.71815	1550	21
GO_cellular_component_organization	0.0178256	0.0483206	0.194986	1.68343	1532	192
GO_positive_regulation_of_cell_death	0.0578778	0.127838	-0.193477	-1.49281	1511	47
GO_adaptive_immune_response	0.0435461	0.100585	-0.325649	-1.59373	1507	17
GO_cellular_amino_acid_metabolic_process	0.0224916	0.0578607	0.374322	1.72511	1502	21
GO_negative_regulation_of_immune_system_process	0.0419667	0.0983219	-0.348767	-1.60989	1497	15
GO_cofactor_metabolic_process	0.0223976	0.0578457	0.397953	1.72975	1475	18
GO_chemotaxis	0.042369	0.0989112	-0.289282	-1.59831	1384	22
GO_anatomical_structure_morphogenesis	0.063621	0.139118	-0.154344	-1.45702	1354	79
GO_regulation_of_cell_death	0.0608571	0.133967	-0.157493	-1.4667	1314	76
GO_mRNA_metabolic_process	0.0180336	0.0486834	0.361719	1.75703	1227	24
GO_regulation_of_cell_population_proliferation	0.0548904	0.122873	-0.162462	-1.48455	1214	72
GO_regulation_of_cellular_catabolic_process	0.0392596	0.0926414	-0.235949	-1.58586	1138	34
GO_apoptotic_signaling_pathway	0.038169	0.0907205	-0.243317	-1.59287	1128	32
GO_positive_regulation_of_cellular_catabolic_process	0.0320651	0.0773334	-0.321176	-1.65761	1087	19
GO_positive_regulation_of_cell_differentiation	0.0392033	0.0926414	-0.21228	-1.57983	1056	43
GO_regulation_of_epithelial_cell_proliferation	0.028997	0.0711314	-0.333136	-1.67466	988	18
GO_protein_import	0.014918	0.041467	0.433315	1.79703	966	16
GO_response_to_peptide	0.0287221	0.0708335	-0.310213	-1.67841	952	21
GO_chromosome_organization	0.0128699	0.0371924	0.295004	1.80205	947	46
GO_cytokine_production	0.0325365	0.0781828	-0.23866	-1.6239	934	35
GO_taxis	0.0267973	0.0673526	-0.299141	-1.68717	866	23
GO_positive_regulation_of_developmental_process	0.0357202	0.08552	-0.18602	-1.57465	856	59
GO_programmed_cell_death	0.0432158	0.100175	-0.151377	-1.51324	851	93
GO_leukocyte_activation	0.0281466	0.069676	-0.260493	-1.65576	847	30
GO_system_process	0.0277768	0.0690211	-0.229074	-1.65217	767	40
GO_regulation_of_mitotic_cell_cycle	0.0107764	0.0329073	0.349751	1.84653	752	30
GO_monocarboxylic_acid_metabolic_process	0.0213669	0.0554019	-0.337561	-1.74218	724	19
GO_lipid_transport	0.0200642	0.05286	-0.370828	-1.76453	705	16
GO_negative_regulation_of_transport	0.0209162	0.0544486	-0.322261	-1.7436	693	21
GO_angiogenesis	0.0202891	0.0532386	-0.34706	-1.74466	691	18
GO_positive_regulation_of_intracellular_signal_transduction	0.0243326	0.0617117	-0.241344	-1.6851	689	37
GO_establishment_of_protein_localization_to_organelle	0.00983745	0.0314799	0.420847	1.86508	649	19
GO_epithelium_development	0.0232849	0.0594354	-0.227613	-1.67659	632	42
GO_positive_regulation_of_MAPK_cascade	0.0204839	0.0535357	-0.280514	-1.73001	628	28
GO_glycerolipid_metabolic_process	0.0178191	0.0483206	-0.375328	-1.78594	626	16
GO_regulation_of_secretion	0.0190288	0.0505379	-0.268638	-1.73178	566	31
GO_regulation_of_secretion_by_cell	0.0190288	0.0505379	-0.268638	-1.73178	566	31
GO_maintenance_of_location	0.0168167	0.0461581	-0.336936	-1.78193	563	20
GO_mitotic_cell_cycle_phase_transition	0.00833715	0.0283377	0.394249	1.88184	563	23
GO_regulation_of_macromolecule_metabolic_process	0.0377184	0.0899754	-0.124221	-1.49662	528	191
GO_heart_development	0.0155214	0.0429622	-0.332092	-1.79679	514	21
GO_intracellular_signal_transduction	0.0250372	0.0631707	-0.163922	-1.61345	504	89
GO_regulation_of_anatomical_structure_morphogenesis	0.0182821	0.0489514	-0.234207	-1.72517	496	42
GO_nucleic_acid_metabolic_process	0.00565105	0.0215528	0.217067	1.83927	480	167
GO_response_to_cytokine	0.0191758	0.050723	-0.208028	-1.69665	475	54
GO_response_to_lipopolysaccharide	0.0138681	0.0391843	-0.362841	-1.82399	472	18
GO_response_to_molecule_of_bacterial_origin	0.0138222	0.0391843	-0.352502	-1.81929	468	19
GO_cell_death	0.0243648	0.0617117	-0.157463	-1.60688	467	99
GO_DNA_repair	0.00699606	0.0248076	0.42247	1.90917	464	20
GO_organic_cyclic_compound_biosynthetic_process	0.0271456	0.0679675	-0.143554	-1.57948	457	128
GO_protein_metabolic_process	0.0295982	0.0719126	-0.129829	-1.53438	438	170
GO_negative_regulation_of_gene_expression	0.0181914	0.048908	-0.190879	-1.69846	414	67
GO_organic_cyclic_compound_metabolic_process	0.00476014	0.0195706	0.213664	1.85867	410	207
GO_cell_cycle_phase_transition	0.00596832	0.0226313	0.392518	1.93524	407	25
GO_cellular_response_to_stimulus	0.0291682	0.0711314	-0.126	-1.53558	397	208
GO_MAPK_cascade	0.0139773	0.0391843	-0.252343	-1.7809	392	38
GO_signal_transduction_by_protein_phosphorylation	0.0139773	0.0391843	-0.252343	-1.7809	392	38
GO_lipid_localization	0.0114199	0.0337452	-0.35047	-1.8535	382	20
GO_regulation_of_ion_transport	0.0105152	0.032728	-0.396335	-1.8859	369	16
GO_cellular_calcium_ion_homeostasis	0.0106266	0.032728	-0.382347	-1.87121	367	17
GO_calcium_ion_homeostasis	0.0106266	0.032728	-0.382347	-1.87121	367	17
GO_cellular_divalent_inorganic_cation_homeostasis	0.0106266	0.032728	-0.382347	-1.87121	367	17
GO_divalent_inorganic_cation_homeostasis	0.0106266	0.032728	-0.382347	-1.87121	367	17
GO_protein_localization_to_organelle	0.00505705	0.0197466	0.353853	1.95275	358	34
GO_positive_regulation_of_cell_migration	0.0114123	0.0337452	-0.309756	-1.84779	356	26
GO_positive_regulation_of_locomotion	0.0114123	0.0337452	-0.309756	-1.84779	356	26
GO_positive_regulation_of_cellular_component_movement	0.0114123	0.0337452	-0.309756	-1.84779	356	26
GO_positive_regulation_of_cell_motility	0.0114123	0.0337452	-0.309756	-1.84779	356	26
GO_hemopoiesis	0.0122016	0.0358445	-0.258466	-1.80465	345	37
GO_negative_regulation_of_signal_transduction	0.0132126	0.0380153	-0.229138	-1.78306	342	48
GO_regulation_of_cell_activation	0.00935004	0.0305156	-0.400197	-1.90428	328	16
GO_regulation_of_lipid_metabolic_process	0.00958747	0.0309117	-0.375535	-1.8878	326	18
GO_cation_transport	0.00991159	0.0315631	-0.341235	-1.88535	323	22
GO_RNA_localization	0.00497574	0.0196482	0.48477	1.95829	319	15
GO_signal_release	0.0106156	0.032728	-0.282476	-1.84923	313	32
GO_negative_regulation_of_response_to_stimulus	0.0125622	0.0364637	-0.206008	-1.7701	297	61
GO_cellular_response_to_peptide	0.00861993	0.0287892	-0.379009	-1.90526	293	18
GO_locomotion	0.012476	0.0363746	-0.205091	-1.77289	292	62
GO_regulation_of_vasculature_development	0.0082701	0.0282562	-0.404475	-1.92463	290	16
GO_cell_activation	0.0100567	0.0318706	-0.273553	-1.86132	288	35
GO_organelle_localization	0.00435875	0.0183291	0.445787	1.97561	287	19
GO_cellular_response_to_lipid	0.00917461	0.0300927	-0.316489	-1.88796	286	26
GO_negative_regulation_of_cell_cycle	0.00411053	0.0178577	0.403639	1.99008	280	25
GO_vesicle-mediated_transport	0.00902074	0.0297367	-0.306353	-1.88937	276	28
GO_negative_regulation_of_macromolecule_metabolic_process	0.0139087	0.0391843	-0.168953	-1.69457	272	94
GO_positive_regulation_of_multicellular_organismal_process	0.0122396	0.0358445	-0.19313	-1.75578	271	71
GO_positive_regulation_of_signal_transduction	0.0107852	0.0329073	-0.210385	-1.7941	256	60
GO_regulation_of_growth	0.00780079	0.0269333	-0.347951	-1.92246	254	22
GO_cellular_nitrogen_compound_metabolic_process	0.00294124	0.0141872	0.219503	1.92099	254	220
GO_negative_regulation_of_metabolic_process	0.0136574	0.0391233	-0.162541	-1.69378	253	106
GO_regulation_of_metabolic_process	0.0176428	0.0482235	-0.132244	-1.61078	240	207
GO_hematopoietic_or_lymphoid_organ_development	0.00814454	0.0279729	-0.265213	-1.87172	228	38
GO_regulation_of_cellular_metabolic_process	0.0159112	0.043856	-0.135313	-1.62575	224	187
GO_establishment_of_organelle_localization	0.00342082	0.0160255	0.495956	2.00348	219	15
GO_regulation_of_nitrogen_compound_metabolic_process	0.0147383	0.0411418	-0.138101	-1.64722	213	178
GO_regulation_of_hormone_levels	0.00617961	0.0230331	-0.40527	-1.9834	213	17
GO_developmental_growth	0.00635925	0.0235184	-0.363382	-1.96608	210	21
GO_ion_transport	0.00686417	0.0248076	-0.27031	-1.9077	192	38
GO_heterocycle_biosynthetic_process	0.0111118	0.0335913	-0.158192	-1.71603	191	122
GO_aromatic_compound_biosynthetic_process	0.0111118	0.0335913	-0.158192	-1.71603	191	122
GO_negative_regulation_of_nucleobase-containing_compound_metabolic_process	0.00685194	0.0248076	-0.247807	-1.91199	178	47
GO_secretion_by_cell	0.00641738	0.0235184	-0.269867	-1.92492	178	39
GO_export_from_cell	0.00641738	0.0235184	-0.269867	-1.92492	178	39
GO_regulation_of_RNA_metabolic_process	0.00961279	0.0309117	-0.166888	-1.74534	177	107
GO_negative_regulation_of_cellular_metabolic_process	0.0088853	0.0294382	-0.179047	-1.78354	175	92
GO_epithelial_cell_differentiation	0.00559427	0.0214611	-0.329078	-1.96305	174	26
GO_regulation_of_transport	0.0072941	0.0257254	-0.219565	-1.8586	174	59
GO_ossification	0.00483133	0.0195706	-0.423905	-2.01709	169	16
GO_regulation_of_macromolecule_biosynthetic_process	0.0095989	0.0309117	-0.161458	-1.74081	167	119
GO_cell_migration	0.00696065	0.0248076	-0.220818	-1.86921	166	59
GO_cell_motility	0.00696065	0.0248076	-0.220818	-1.86921	166	59
GO_localization_of_cell	0.00696065	0.0248076	-0.220818	-1.86921	166	59
GO_cellular_response_to_chemical_stress	0.00486281	0.0195706	-0.391619	-2.02117	164	19
GO_cellular_response_to_oxidative_stress	0.00476465	0.0195706	-0.414778	-2.02993	164	17
GO_nucleobase-containing_compound_metabolic_process	0.00186096	0.0101733	0.229236	1.97789	159	191
GO_nucleobase-containing_compound_biosynthetic_process	0.0084179	0.0284646	-0.161112	-1.74369	145	121
GO_regulation_of_small_molecule_metabolic_process	0.00419269	0.0180948	-0.404541	-2.03361	142	18
GO_regulation_of_gene_expression	0.00864553	0.0287892	-0.154119	-1.7333	140	139
GO_myeloid_leukocyte_migration	0.00386609	0.0172527	-0.446095	-2.05916	137	15
GO_regulation_of_nucleobase-containing_compound_metabolic_process	0.00738736	0.0257772	-0.164943	-1.7706	130	117
GO_negative_regulation_of_cellular_biosynthetic_process	0.00521003	0.0202235	-0.232324	-1.92815	127	56
GO_regulation_of_response_to_stress	0.00498861	0.0196482	-0.245111	-1.95645	126	51
GO_vasculature_development	0.00403982	0.0176675	-0.334388	-2.02663	124	27
GO_cardiovascular_system_development	0.00403982	0.0176675	-0.334388	-2.02663	124	27
GO_tube_development	0.00440808	0.0184185	-0.28488	-1.98908	124	37
GO_regulation_of_biosynthetic_process	0.00735646	0.0257772	-0.15858	-1.75756	122	131
GO_regulation_of_primary_metabolic_process	0.00847575	0.0285133	-0.144539	-1.7292	121	181
GO_DNA_replication	0.00179744	0.010092	0.448924	2.10743	120	22
GO_heterocycle_metabolic_process	0.00133691	0.00864523	0.23291	2.01261	114	194
GO_negative_regulation_of_RNA_metabolic_process	0.00426094	0.0181297	-0.261505	-1.98293	112	45
GO_regulation_of_signal_transduction	0.00606353	0.0228112	-0.175399	-1.81521	112	104
GO_multicellular_organismal_homeostasis	0.00328378	0.0154976	-0.412724	-2.07475	111	18
GO_regulation_of_cellular_macromolecule_biosynthetic_process	0.00608531	0.0228112	-0.168142	-1.79592	108	115
GO_secretion	0.00376144	0.0169007	-0.278629	-2.00958	103	40
GO_negative_regulation_of_nitrogen_compound_metabolic_process	0.00482137	0.0195706	-0.195355	-1.88782	99	84
GO_regulation_of_biological_process	0.00748434	0.0259774	-0.141725	-1.73073	97	307
GO_positive_regulation_of_cell_communication	0.0042837	0.0181297	-0.216544	-1.9373	96	68
GO_positive_regulation_of_signaling	0.0042837	0.0181297	-0.216544	-1.9373	96	68
GO_cellular_aromatic_compound_metabolic_process	0.00112529	0.00768948	0.232614	2.01539	96	198
GO_regulation_of_response_to_external_stimulus	0.00327623	0.0154976	-0.312233	-2.07158	95	33
GO_negative_regulation_of_cellular_macromolecule_biosynthetic_process	0.00374653	0.0169007	-0.244393	-1.99323	92	54
GO_metal_ion_transport	0.00265666	0.0131035	-0.431823	-2.11335	91	17
GO_regulation_of_cellular_biosynthetic_process	0.00541654	0.0209015	-0.166648	-1.83061	91	127
GO_negative_regulation_of_cell_communication	0.0035137	0.0161188	-0.255077	-2.01647	89	50
GO_negative_regulation_of_signaling	0.0035137	0.0161188	-0.255077	-2.01647	89	50
GO_blood_vessel_development	0.00281312	0.0136697	-0.35005	-2.08816	87	26
GO_negative_regulation_of_biosynthetic_process	0.00358453	0.0163295	-0.234815	-1.98769	85	59
GO_negative_regulation_of_macromolecule_biosynthetic_process	0.0034445	0.0160255	-0.243145	-1.99968	84	55
GO_transmembrane_receptor_protein_tyrosine_kinase_signaling_pathway	0.00279688	0.0136697	-0.333406	-2.08764	84	29
GO_cellular_response_to_hormone_stimulus	0.00250151	0.0124317	-0.390719	-2.11399	82	21
GO_cellular_response_to_oxygen-containing_compound	0.00298111	0.0142745	-0.249001	-2.03082	73	54
GO_organelle_organization	0.000894552	0.00674513	0.261987	2.09728	73	122
GO_regulation_of_cell_cycle	0.000914707	0.00675535	0.329589	2.14238	68	56
GO_multicellular_organismal_process	0.00485645	0.0195706	-0.149132	-1.79727	67	192
GO_positive_regulation_of_response_to_external_stimulus	0.001849	0.0101733	-0.468901	-2.16443	65	15
GO_biological_regulation	0.00500189	0.0196482	-0.144453	-1.75978	65	312
GO_cellular_metal_ion_homeostasis	0.0019381	0.0104477	-0.408711	-2.16152	64	20
GO_response_to_hormone	0.00212427	0.0111119	-0.338694	-2.15283	63	30
GO_regulation_of_cellular_process	0.00489358	0.0195743	-0.144222	-1.7672	62	291
GO_cytokine-mediated_signaling_pathway	0.00194303	0.0104477	-0.371386	-2.13336	61	24
GO_regulation_of_system_process	0.00168091	0.00984532	-0.471113	-2.17464	59	15
GO_nucleocytoplasmic_transport	0.000891292	0.00674513	0.469821	2.20553	59	22
GO_nuclear_transport	0.000891292	0.00674513	0.469821	2.20553	59	22
GO_enzyme_linked_receptor_protein_signaling_pathway	0.00217031	0.0112104	-0.28527	-2.1013	58	42
GO_anatomical_structure_development	0.00402785	0.0176675	-0.153499	-1.82183	58	174
GO_cellular_homeostasis	0.00185874	0.0101733	-0.343086	-2.18075	55	30
GO_regulation_of_defense_response	0.00165763	0.00979641	-0.409727	-2.21684	54	21
GO_regulation_of_transcription_by_RNA_polymerase_II	0.0021343	0.0111119	-0.252577	-2.11047	51	57
GO_transcription_by_RNA_polymerase_II	0.0021343	0.0111119	-0.252577	-2.11047	51	57
GO_cellular_cation_homeostasis	0.00150693	0.00906924	-0.414335	-2.24176	49	21
GO_metal_ion_homeostasis	0.00150693	0.00906924	-0.414242	-2.24126	49	21
GO_regulation_of_nucleic_acid-templated_transcription	0.00242606	0.0121689	-0.193704	-1.96345	46	97
GO_regulation_of_immune_response	0.00137802	0.00864523	-0.441997	-2.2219	46	18
GO_regulation_of_hemopoiesis	0.00135569	0.00864523	-0.429392	-2.21612	45	19
GO_regulation_of_transcription,_DNA-templated	0.0023147	0.0117709	-0.197259	-1.99282	44	96
GO_nucleic_acid-templated_transcription	0.0022609	0.0115871	-0.196742	-2.01187	42	100
GO_regulation_of_response_to_stimulus	0.00243006	0.0121689	-0.177696	-1.95513	40	128
GO_tissue_development	0.00179994	0.010092	-0.228859	-2.0806	39	71
GO_positive_regulation_of_response_to_stimulus	0.00177693	0.010092	-0.229238	-2.10299	38	73
GO_regulation_of_RNA_biosynthetic_process	0.00197444	0.0105303	-0.195186	-1.98392	37	98
GO_negative_regulation_of_transcription,_DNA-templated	0.0013723	0.00864523	-0.29012	-2.15913	36	43
GO_negative_regulation_of_RNA_biosynthetic_process	0.0013723	0.00864523	-0.29012	-2.15913	36	43
GO_negative_regulation_of_nucleic_acid-templated_transcription	0.0013723	0.00864523	-0.29012	-2.15913	36	43
GO_response_to_oxygen-containing_compound	0.00160982	0.00960035	-0.243774	-2.15796	36	66
GO_cytoskeleton_organization	0.000480679	0.00470635	0.344098	2.19949	35	53
GO_ion_homeostasis	0.00110724	0.00768948	-0.361342	-2.2285	33	28
GO_transcription,_DNA-templated	0.0017701	0.010092	-0.200209	-2.04309	33	99
GO_RNA_biosynthetic_process	0.00179297	0.010092	-0.19798	-2.03073	33	101
GO_response_to_lipid	0.00117193	0.00792562	-0.334774	-2.25008	33	34
GO_blood_vessel_morphogenesis	0.00106553	0.007516	-0.387586	-2.22642	33	24
GO_tube_morphogenesis	0.00111566	0.00768948	-0.344824	-2.25738	32	32
GO_regulation_of_locomotion	0.00103969	0.00749489	-0.311828	-2.22423	28	39
GO_response_to_oxidative_stress	0.000916503	0.00675535	-0.386915	-2.26814	28	25
GO_leukocyte_differentiation	0.000864691	0.00674513	-0.434581	-2.29833	28	20
GO_lipid_metabolic_process	0.00106294	0.007516	-0.291717	-2.2329	27	46
GO_cellular_lipid_metabolic_process	0.000887311	0.00674513	-0.346226	-2.29712	25	33
GO_regulation_of_cell_communication	0.00146619	0.008989	-0.19015	-2.04119	25	117
GO_regulation_of_signaling	0.00146619	0.008989	-0.19015	-2.04119	25	117
GO_growth	0.000855516	0.00674513	-0.36403	-2.2794	25	29
GO_immune_effector_process	0.000855516	0.00674513	-0.364242	-2.28072	25	29
GO_hormone_transport	0.000672363	0.00575461	-0.50554	-2.33355	23	15
GO_hormone_secretion	0.000672363	0.00575461	-0.50554	-2.33355	23	15
GO_regulation_of_biological_quality	0.00138376	0.00864523	-0.189781	-2.05396	23	121
GO_cation_homeostasis	0.000703601	0.00591746	-0.419556	-2.31808	22	22
GO_homeostatic_process	0.000999305	0.00728382	-0.258243	-2.26854	22	65
GO_negative_regulation_of_cell_differentiation	0.000758307	0.00629683	-0.343161	-2.30646	21	34
GO_cellular_ion_homeostasis	0.000642418	0.00575461	-0.42292	-2.33667	20	22
GO_multicellular_organism_development	0.00131935	0.00864523	-0.166936	-1.9506	19	162
GO_regulation_of_cellular_component_movement	0.000651018	0.00575461	-0.32036	-2.31056	17	40
GO_cellular_chemical_homeostasis	0.000543444	0.00509284	-0.393433	-2.34695	16	26
GO_regulation_of_multicellular_organismal_development	0.00080937	0.00663683	-0.228599	-2.17723	16	81
GO_inorganic_ion_homeostasis	0.000432713	0.00431874	-0.427651	-2.41197	13	23
GO_regulation_of_localization	0.000675465	0.00575461	-0.215929	-2.19475	12	98
GO_regulation_of_cell_migration	0.000426788	0.00431874	-0.334841	-2.36312	11	38
GO_regulation_of_cell_motility	0.000426788	0.00431874	-0.334841	-2.36312	11	38
GO_negative_regulation_of_multicellular_organismal_process	0.000434508	0.00431874	-0.297931	-2.39558	10	52
GO_cellular_response_to_chemical_stimulus	0.0006285	0.00572633	-0.203211	-2.19098	10	119
GO_carbohydrate_metabolic_process	0.000298169	0.00331524	-0.477083	-2.52311	9	20
GO_leukocyte_migration	0.000298169	0.00331524	-0.471575	-2.49398	9	20
GO_positive_regulation_of_immune_system_process	0.000335604	0.00366927	-0.380352	-2.45194	9	31
GO_animal_organ_development	0.000540044	0.00509284	-0.209991	-2.19611	9	107
GO_negative_regulation_of_transcription_by_RNA_polymerase_II	0.000258548	0.00297557	-0.403371	-2.44472	7	27
GO_sister_chromatid_segregation	0.000123417	0.00169804	0.591693	2.45386	7	16
GO_DNA_metabolic_process	0.000112255	0.00160086	0.436095	2.43044	7	35
GO_response_to_stimulus	0.000613215	0.00566576	-0.168892	-2.0847	7	244
GO_system_development	0.000500532	0.00482866	-0.186499	-2.11508	7	144
GO_regulation_of_cell_cycle_process	9.82236e-05	0.00146442	0.441371	2.45984	6	35
GO_chemical_homeostasis	0.000213394	0.00254521	-0.34707	-2.44943	5	38
GO_response_to_bacterium	0.000161593	0.00204386	-0.416013	-2.52134	4	27
GO_negative_regulation_of_biological_process	0.000357092	0.00377826	-0.184785	-2.22696	4	192
GO_developmental_process	0.000350853	0.0037731	-0.176534	-2.11716	4	185
GO_cell_division	5.61277e-05	0.00101049	0.454431	2.53262	3	35
GO_mitotic_sister_chromatid_segregation	6.21968e-05	0.00103115	0.639865	2.58482	3	15
GO_organelle_fission	5.74614e-05	0.00101049	0.481355	2.5108	3	29
GO_cellular_component_organization_or_biogenesis	4.61239e-05	0.000992158	0.275463	2.41223	3	222
GO_cellular_developmental_process	0.000230627	0.00270163	-0.213945	-2.31548	3	121
GO_negative_regulation_of_cellular_process	0.000205142	0.0024921	-0.189804	-2.26411	2	177
GO_circulatory_system_development	0.000107554	0.0015679	-0.355733	-2.53739	2	39
GO_regulation_of_cell_differentiation	0.000135532	0.00177818	-0.279097	-2.55035	2	72
GO_regulation_of_multicellular_organismal_process	0.000162013	0.00204386	-0.224743	-2.35039	2	107
GO_cell_differentiation	0.000172434	0.00213427	-0.218018	-2.35652	2	120
GO_innate_immune_response	6.46371e-05	0.00103115	-0.449379	-2.72356	1	27
GO_response_to_chemical	0.000129316	0.00173125	-0.199792	-2.31133	1	155
GO_nuclear_chromosome_segregation	3.02691e-05	0.000953621	0.594595	2.63508	1	19
GO_cellular_component_biogenesis	2.38701e-05	0.000869931	0.311219	2.55976	1	140
GO_response_to_stress	0.000124247	0.00169804	-0.19384	-2.1916	1	142
GO_defense_response_to_other_organism	3.49211e-05	0.000953621	-0.478576	-3.29985	0	36
GO_response_to_external_biotic_stimulus	3.8279e-05	0.000953621	-0.434387	-3.35158	0	47
GO_response_to_other_organism	3.8279e-05	0.000953621	-0.434387	-3.35158	0	47
GO_response_to_biotic_stimulus	3.92804e-05	0.000953621	-0.402699	-3.2143	0	51
GO_interspecies_interaction_between_organisms	4.07034e-05	0.000953621	-0.329176	-2.73197	0	56
GO_negative_regulation_of_developmental_process	3.86922e-05	0.000953621	-0.376509	-2.95865	0	49
GO_response_to_organic_substance	5.85343e-05	0.00101049	-0.24963	-2.72793	0	125
GO_cellular_response_to_organic_substance	5.19588e-05	0.000992158	-0.240371	-2.44319	0	98
GO_cell_cycle	1.25897e-05	0.000577452	0.38995	2.86251	0	85
GO_cell_cycle_process	1.32209e-05	0.000577452	0.417272	2.72868	0	57
GO_microtubule-based_process	1.44308e-05	0.000577452	0.541986	2.78998	0	28
GO_microtubule_cytoskeleton_organization	1.45512e-05	0.000577452	0.581671	2.91221	0	26
GO_chromosome_segregation	1.49645e-05	0.000577452	0.597077	2.75171	0	21
GO_mitotic_nuclear_division	1.46854e-05	0.000577452	0.567753	2.75782	0	24
GO_nuclear_division	1.45512e-05	0.000577452	0.545975	2.7335	0	26
GO_mitotic_cell_cycle	1.33894e-05	0.000577452	0.453293	2.88096	0	52
GO_mitotic_cell_cycle_process	1.36088e-05	0.000577452	0.455494	2.76248	0	45
GO_ribosome_biogenesis	1.39111e-05	0.000577452	0.541126	3.09949	0	38
GO_ribonucleoprotein_complex_biogenesis	1.36909e-05	0.000577452	0.547046	3.26867	0	43
GO_ncRNA_metabolic_process	1.40319e-05	0.000577452	0.550538	3.06824	0	35
GO_ncRNA_processing	1.41999e-05	0.000577452	0.547009	2.95498	0	32
GO_RNA_processing	1.35759e-05	0.000577452	0.522296	3.19048	0	46
GO_organelle_assembly	1.46282e-05	0.000577452	0.544405	2.6841	0	25
GO_rRNA_processing	1.44308e-05	0.000577452	0.542373	2.79197	0	28
GO_rRNA_metabolic_process	1.44308e-05	0.000577452	0.542373	2.79197	0	28
GO_regulation_of_immune_system_process	3.79622e-05	0.000953621	-0.422259	-3.23212	0	46
GO_defense_response	4.25804e-05	0.000963197	-0.421432	-3.64304	0	62
GO_immune_response	3.95007e-05	0.000953621	-0.386945	-3.11131	0	52
GO_cell_surface_receptor_signaling_pathway	4.92854e-05	0.000992158	-0.306423	-3.0069	0	88
GO_signal_transduction	6.40328e-05	0.00103115	-0.210548	-2.41586	0	151
GO_inflammatory_response	3.44685e-05	0.000953621	-0.410239	-2.7573	0	34
GO_response_to_external_stimulus	4.88568e-05	0.000992158	-0.292598	-2.84901	0	86
GO_immune_system_process	5.14377e-05	0.000992158	-0.347793	-3.5136	0	96
GO_signaling	6.7245e-05	0.00103115	-0.218921	-2.58888	0	169
GO_cell_communication	6.75904e-05	0.00103115	-0.212681	-2.51489	0	171
GO_regulation_of_developmental_process	5.29353e-05	0.000992158	-0.244704	-2.51848	0	102
