# Supplementary material for: Pancreatic tumors exhibit myeloid-driven amino acid stress and upregulate arginine biosynthesis
Source: eLife. 2023 May 31;12:e81289. doi: 10.7554/eLife.81289 (PMC10260022; doi:10.7554/eLife.81289)
Supplement: Figure 2—source data 1. — ND = metabolite not detected. [file elife-81289-fig2-data1.xlsx]

## Sheet: For Publication
Consumption (-) or release (+) rates of metabolites in mPDAC1-TIFM or mPDAC1-RPMI cell lines
ND indicated metabolite not detected
Metabolite	mPDAC1_TIFM_CoRe_Rate (pmol/cell/day)	mPDAC1_TIFM_CoRe_Rate_SEM	mPDAC1_RPMI_CoRe_Rate (pmol/cell/day)	mPDAC1_RPMI_CoRe_Rate_SEM
2-aminobutyrate	0.0455495	0.0172777	0.00315841	0.0473159
2-hydroxybutyrate	0.0553329	0.0154209	0.00284958	0.000339037
2-hydroxyglutarate	0.00265641	0.00214381	0.000383939	3.45064e-05
3-hydroxyisobutyric acid	0.0305876	0.0326856	-0.000870668	0.000501324
3-methyl-2-oxobutyrate-keto-isovaleric-acid	-0.0676425	0.0198605	0.00527873	0.000627466
3-methyl-2-oxopentanoic-acid-ketoisoleucine	0.666394	0.0861432	0.251486	0.0380778
3-phosphoglycerate	-0.11704	0.0294404	0.00473903	0.000213086
a-aminobutyrate	0.0171177	0.0991372	ND	ND
acetylaspartate	0.0200997	0.00457249	ND	ND
acetylcarnitine	-0.129257	0.0763921	ND	ND
acetylglutamate	0.00509202	0.000869661	0.000165719	1.2209e-05
acetylglutamine	0.000312085	0.000566438	6.58833e-05	2.31115e-05
AKB	-0.734143	0.0682955	-0.0013044	0.0143812
akg	0.130796	0.0134945	0.0320333	0.00130862
alanine	5.52136	2.03332	0.258283	0.0577799
allantoin	0.554711	0.110014	-0.00166588	0.00130165
Aminoadipate	0.0222568	0.0155736	0.00308713	0.00155809
arginine	-0.0467065	0.00326403	-2.0215	0.124475
asparagine	-0.0278251	0.0890617	-0.269997	0.0650789
aspartate	0.121953	0.208465	0.0377838	0.0181526
asymmetric-dimethylarginine	0.00148615	8.43732e-05	0.000539014	2.54707e-05
beta-Alanine	0.00974025	0.0124303	-0.000215052	0.000785976
betaine	0.215505	0.284098	0.000646636	0.00064672
biotin	-0.000166865	0.000175674	-0.000554673	0.000324782
Carbamoylaspartate	-0.000230344	0.00366461	0.000831998	4.80319e-05
carnitine	0.0531216	0.0383219	4.58588e-05	3.70463e-05
carnosine	0.000402072	0.00103914	ND	ND
choline	1.92592	0.221343	-0.038846	0.0111957
cis-aconitic-acid	0.0514409	0.0107439	0.00588156	0.000350928
citrate	0.14347	0.210425	0.101568	0.00545457
citrulline	-0.0688652	0.0524479	0.00067819	0.00116683
creatine	3.29771	2.29353	-0.0155466	0.0256996
creatinine	0.148346	0.0279503	-0.0010434	0.00173675
cysteic acid	-1.88234e-05	1.88266e-05	4.75287e-06	4.75349e-06
cystine	-0.124356	0.0407563	0.784683	0.0636858
cytidine	0.0242981	0.0322313	ND	ND
deoxycytidine	-4.65404e-05	3.36316e-05	ND	ND
DHAP	-0.136376	0.0104863	-0.000957106	0.00052898
folate	ND	ND	0.0144208	0.000791773
Fructose	0.305448	0.0318338	0.0389587	0.00711157
Fumarate	-0.000521171	0.00363328	8.57513e-05	0.000747076
gaba	-0.0146601	0.0792002	0.00697244	0.00292513
Glucose	-63.0603	3.64541	-22.1184	2.52417
glucose-1-phosphate	-0.0853243	0.0677488	0.00479986	0.00454554
Glucose-6-phosphate	-0.443383	0.0980273	0.000472195	0.000944667
glutamate	3.82703	0.772685	0.486101	0.0332553
glutamine	-4.25414	0.50202	-4.65468	0.181055
gly-gly	-0.0511117	0.103416	-0.262813	0.0751193
glycerate	0.0369807	0.00416262	0.00144909	0.000305777
Glycerophosphocholine	0.232056	0.0800308	0.00426983	0.000977979
glycine	2.39374	1.45433	-0.0589053	0.126295
gsh	-0.164042	0.00801192	-0.000925983	0.00259631
gssg	-0.090461	0.0686237	ND	ND
histidine	0.00212692	0.130873	-0.0863946	0.0246605
homocysteine	-0.011173	0.0131884	-0.0404447	0.00302492
hydroxyproline	ND	ND	-0.0390998	0.0197175
hypotaurine	-0.00731088	0.0124933	ND	ND
hypoxanthine	0.639686	0.0862385	0.000183024	0.00114939
inosine	-0.901839	0.0812249	ND	ND
isoleucine	-0.341191	0.158813	-0.377764	0.0818542
itaconic-acid	0.041753	0.0270377	0.00394531	0.00330597
Kynurenine	9.19843e-05	0.00120842	6.74944e-05	8.69554e-05
lactate	114.147	4.5061	30.6653	1.20602
leucine	-0.53705	0.199734	-0.510261	0.108095
lysine	-0.0705876	0.0784424	-0.317459	0.0217742
Malate	0.0521178	0.0627093	0.0190834	0.00261338
methionine	-0.0581112	0.0430447	-0.135954	0.0115754
methionine-sulfoxide	0.0012453	0.00231069	0.000174902	0.000712217
methylthioadenosine	-4.51584e-05	4.66942e-05	3.23074e-05	4.8516e-06
myo-inositol	-0.1711	0.390605	-0.018375	0.0134009
N6-acetyllysine	0.000443965	0.000412433	5.20074e-05	1.43151e-05
Niacinamide	0.0158527	0.0253143	-0.00172089	0.000949093
o-phosphoethanolamine	-2.59305	0.686117	-0.0106744	0.0106757
ornithine	0.203022	0.22621	1.69892	0.0929347
Orotate	0.00106192	0.000626905	0.00062409	2.34079e-05
p-aminobenzoate	-0.0237278	0.00637521	-0.00121782	0.0017217
Pantothenate	0.00373189	0.0023599	-0.00056815	0.000146347
phenylalanine	-0.0163115	0.0493396	-0.139073	0.0129127
phosphocholine	-1.0889	0.154482	0.00943473	0.00118116
phosphocreatine	-2.75494	0.192774	ND	ND
Phosphoenolpyruvate	-0.13473	0.028349	0.00259978	0.000168985
pipecolate	0.00261136	0.00231015	0.0166421	0.0166788
proline	0.338826	0.0813925	0.03261	0.0238901
pyridoxal	8.69215e-05	2.87867e-05	0.00114333	5.44169e-05
pyridoxine	ND	ND	-0.00182984	0.000393695
pyroglutamate-5-oxoproline	1.02384	0.0350535	0.683781	0.0171801
pyruvate	0.727838	0.0666517	1.8306	0.0826349
ribose-5-phosphate	-1.20029	0.0635471	ND	ND
sah	-3.26454e-05	0.000218333	4.16897e-05	9.34656e-06
serine	-0.152713	0.134801	-0.683539	0.0402002
sorbitol	0.000574111	0.000438906	ND	ND
Succinate	0.141611	0.0593249	0.00581044	0.00277965
taurine	2.31017	1.48856	0.00183994	0.00694708
threonine	0.0796636	0.195294	-0.207754	0.0329503
trans-urocanate	0.00116477	0.00222897	ND	ND
trimethyllysine	0.000239346	5.02249e-05	6.23189e-05	6.25026e-06
tryptophan	0.0138168	0.139229	-0.0421223	0.0218789
tyrosine	-0.0123753	0.0507781	-0.179005	0.0114309
UDP	-0.00361088	0.00167547	ND	ND
UDP-GlcNAc	-2.05204	0.0858586	ND	ND
UDP-glucose	-0.0227857	0.00109565	ND	ND
UMP	-0.983951	0.03585	ND	ND
Uracil	0.83967	0.125718	ND	ND
uric acid	0.257078	0.0197329	ND	ND
uridine	0.462923	0.171214	ND	ND
valine	0.0598528	0.117342	1.23021	1.56381
xanthine	0.120606	0.0161074	0.000336952	0.000236487
