# Supplementary material for: Pancreatic tumors exhibit myeloid-driven amino acid stress and upregulate arginine biosynthesis
Source: eLife. 2023 May 31;12:e81289. doi: 10.7554/eLife.81289 (PMC10260022; doi:10.7554/eLife.81289)
Supplement: Figure 2—source data 3. — (A) Tumor diameter and weight of mPDAC3-TIFM-based orthotopic tumors were measured to calculate tumor volume and density of this tumor model (n = 4). (B) Metabolite concentrations in mPDAC3 orthotopic tumors and TIF samples in Figure 2M. See Measuring intratumor and interstitial fluid (IF) concentrations of amino acids for experimental details. [file elife-81289-fig2-data3.xlsx]

## Sheet: A. Tumor density measurements
Tumor diameter and weight measurements to calculate tumor volume and density (See Materials and Methods)
	D1(cm)	D2(cm)	D3(cm)	Weight(g)		Volume (cm^3)	Density (g/cm^3)
Tumor_1	0.91	0.61	0.65	0.26		0.188922	1.37623
Tumor_2	0.79	0.65	0.6	0.15		0.161321	0.929824
Tumor_3	0.58	0.42	0.51	0.11		0.0650498	1.69101
Tumor_4	0.93	0.76	0.8	0.35		0.296064	1.18218
					AVERAGE	0.177839	1.29481

## Sheet: B. Intratumoral_IF conc.
Intratumoral or IF amino acid concentrations (uM)
ND indicated not detected
Sample	Alanine	Arginine	Aspartate	Glutamate	Histidine	Lysine	Methionine	Phenylalanine	Proline	Serine	Threonine	Tyrosine	Valine
Tumor_05	37819.6	68.133	926.384	5661.97	145.996	500.219	133.263	130.449	674.963	4629.45	243.301	180.015	262.355
Tumor_06	18525.9	59.9323	890.373	6468.17	157.989	635.703	131.974	150.059	921.219	1819.54	365.948	190.895	288.28
Tumor_07	23387.7	72.5408	804.475	5098.23	195.957	446.684	124.291	124.942	906.25	6100.5	587.282	132.576	169.584
Tumor_08	22490.6	131.277	1319.52	7879.02	171.922	687.942	240.886	145.424	1287.74	13419.2	1021.03	267.022	365.358
TIF_09	6428.63	6.59663	897.033	4246.46	178.798	809.341	219.194	149.446	905.39	627.76	408.893	262.785	522.975
TIF_10	4543.2	7.67556	608.55	2745.23	152.731	868.362	173.422	137.235	450.54	494.63	261.269	231.513	493.133
TIF_11	4373.39	4.7113	421.914	2977.73	143.564	767.088	167.918	120.728	624.21	391.547	313.721	218.025	ND
