# Supplementary material for: Pancreatic tumors exhibit myeloid-driven amino acid stress and upregulate arginine biosynthesis
Source: eLife. 2023 May 31;12:e81289. doi: 10.7554/eLife.81289 (PMC10260022; doi:10.7554/eLife.81289)
Supplement: Figure 4—source data 2. [file elife-81289-fig4-data2.xlsx]

## Sheet: Glutamine
Glutamine
C5H10N2O3
				Natural abundance corrected peak area			Natural abundance corrected percentages
Mouse ID	Sample type	Time of collection (min)	Genotype	M+0	M+1	M+2	M+0	M+1	M+2
A35096	Tumor	240	Arg1fl/fl	1.79601e+08	1.07074e+08	1.40608e+08	42.0332	25.0593	32.9075
A35097	Tumor	240	Arg1fl/fl	1.32797e+08	7.41663e+07	8.65607e+07	45.2422	25.2676	29.4902
A35098	Tumor	240	Arg1fl/fl	1.39733e+08	8.18577e+07	1.18254e+08	41.1168	24.0868	34.7964
785	Tumor	240	Lyz2-Cre+/+; Arg1fl/fl	1.61406e+08	1.22154e+08	1.57496e+08	36.5954	27.6957	35.7089
787	Tumor	240	Lyz2-Cre+/+; Arg1fl/fl	1.6802e+08	1.25016e+08	2.54507e+08	30.6861	22.8322	46.4817
788	Tumor	240	Lyz2-Cre+/+; Arg1fl/fl	1.53766e+08	9.21012e+07	1.70219e+08	36.9553	22.1351	40.9096
789	Tumor	240	Lyz2-Cre+/+; Arg1fl/fl	1.34736e+08	7.41682e+07	7.06246e+07	48.201	26.5333	25.2656
A35089	Tumor	240	Lyz2-Cre+/+; Arg1fl/fl	1.77685e+08	1.41356e+08	1.52481e+08	37.6834	29.9786	32.338
A35465	Tumor	240	Lyz2-Cre+/+; Arg1fl/fl	1.69931e+08	1.0772e+08	1.41856e+08	40.5072	25.6778	33.815
A35466	Tumor	240	Lyz2-Cre+/+; Arg1fl/fl	1.29823e+08	9.78968e+07	1.42954e+08	35.0235	26.4105	38.566
A35469	Tumor	240	Lyz2-Cre+/+; Arg1fl/fl	2.21188e+08	1.53996e+08	2.86244e+08	33.441	23.2824	43.2766
A35096	Plasma	0	Arg1fl/fl	7.36869e+07	0	35881.8	99.9513	0	0.0486713
A35096	Plasma	120	Arg1fl/fl	1.39427e+08	9.66807e+07	1.29448e+08	38.1411	26.4475	35.4113
A35096	Plasma	240	Arg1fl/fl	1.09194e+08	8.15613e+07	1.1373e+08	35.8619	26.7866	37.3514
A35096	Plasma	30	Arg1fl/fl	1.11448e+08	5.28739e+07	9.72251e+07	42.611	20.2159	37.1732
A35097	Plasma	0	Arg1fl/fl	7.5451e+07	0	40048.7	99.9469	0	0.0530509
A35097	Plasma	120	Arg1fl/fl	9.95154e+07	6.73521e+07	1.00131e+08	37.2719	25.2256	37.5025
A35097	Plasma	240	Arg1fl/fl	7.66073e+07	5.51412e+07	7.51015e+07	37.0352	26.6576	36.3072
A35097	Plasma	30	Arg1fl/fl	9.41546e+07	4.77077e+07	1.01643e+08	38.6664	19.5921	41.7416
A35098	Plasma	0	Arg1fl/fl	7.59557e+07	0	0	100	0	0
A35098	Plasma	120	Arg1fl/fl	8.45616e+07	6.05505e+07	1.1807e+08	32.1304	23.0071	44.8625
A35098	Plasma	240	Arg1fl/fl	8.59257e+07	6.55364e+07	1.12505e+08	32.5517	24.8275	42.6208
A35098	Plasma	30	Arg1fl/fl	8.52027e+07	5.7446e+07	1.18722e+08	32.5984	21.9787	45.4229
785	Plasma	0	Lyz2-Cre+/+; Arg1fl/fl	8.52338e+07	0	42486.5	99.9502	0	0.0498222
785	Plasma	120	Lyz2-Cre+/+; Arg1fl/fl	1.44473e+08	1.09751e+08	1.8299e+08	33.044	25.1024	41.8536
785	Plasma	240	Lyz2-Cre+/+; Arg1fl/fl	8.66263e+07	9.48669e+07	1.57479e+08	25.5556	27.9866	46.4578
785	Plasma	30	Lyz2-Cre+/+; Arg1fl/fl	1.31986e+08	7.32466e+07	1.3329e+08	38.9888	21.6371	39.3741
787	Plasma	0	Lyz2-Cre+/+; Arg1fl/fl	6.7322e+07	0	27435.8	99.9593	0	0.0407366
787	Plasma	120	Lyz2-Cre+/+; Arg1fl/fl	9.1753e+07	7.28924e+07	2.24939e+08	23.5515	18.7103	57.7382
787	Plasma	240	Lyz2-Cre+/+; Arg1fl/fl	7.84316e+07	8.50685e+07	2.15309e+08	20.7048	22.4568	56.8384
787	Plasma	30	Lyz2-Cre+/+; Arg1fl/fl	1.17758e+08	4.9518e+07	1.99397e+08	32.1152	13.5047	54.3801
788	Plasma	0	Lyz2-Cre+/+; Arg1fl/fl	6.47329e+07	0	90397.4	99.8605	0	0.139452
788	Plasma	120	Lyz2-Cre+/+; Arg1fl/fl	9.19435e+07	6.6289e+07	1.3805e+08	31.0324	22.3736	46.594
788	Plasma	240	Lyz2-Cre+/+; Arg1fl/fl	7.70315e+07	8.07038e+07	2.0459e+08	21.2603	22.2739	56.4658
788	Plasma	30	Lyz2-Cre+/+; Arg1fl/fl	9.61426e+07	6.38347e+07	1.21063e+08	34.2095	22.7137	43.0768
789	Plasma	0	Lyz2-Cre+/+; Arg1fl/fl	9.66754e+07	0	0	100	0	0
789	Plasma	120	Lyz2-Cre+/+; Arg1fl/fl	1.21614e+08	7.17625e+07	9.67618e+07	41.9159	24.7339	33.3502
789	Plasma	240	Lyz2-Cre+/+; Arg1fl/fl	4.13795e+07	8.52517e+06	5.55165e+08	6.8388	1.40896	91.7522
789	Plasma	30	Lyz2-Cre+/+; Arg1fl/fl	1.3572e+08	6.93407e+07	1.06874e+08	43.509	22.2292	34.2617
A35066	Plasma	0	Lyz2-Cre+/+; Arg1fl/fl	7.20906e+07	0	0	100	0	0
A35066	Plasma	120	Lyz2-Cre+/+; Arg1fl/fl	7.87259e+07	6.20712e+07	1.11399e+08	31.2161	24.6122	44.1717
A35066	Plasma	240	Lyz2-Cre+/+; Arg1fl/fl	6.84059e+07	7.42472e+07	1.528e+08	23.1529	25.13	51.7171
A35066	Plasma	30	Lyz2-Cre+/+; Arg1fl/fl	8.13768e+07	4.61613e+07	1.07544e+08	34.6163	19.6362	45.7475
A35089	Plasma	0	Lyz2-Cre+/+; Arg1fl/fl	8.56151e+07	0	25214.7	99.9706	0	0.0294425
A35089	Plasma	120	Lyz2-Cre+/+; Arg1fl/fl	1.36113e+08	1.09874e+08	1.48293e+08	34.5219	27.8671	37.611
A35089	Plasma	240	Lyz2-Cre+/+; Arg1fl/fl	8.65115e+07	8.73346e+07	1.19532e+08	29.4881	29.7686	40.7433
A35089	Plasma	30	Lyz2-Cre+/+; Arg1fl/fl	1.24642e+08	8.93535e+07	1.32085e+08	36.0153	25.8187	38.166
A35465	Plasma	0	Lyz2-Cre+/+; Arg1fl/fl	9.31419e+07	0	0	100	0	0
A35465	Plasma	120	Lyz2-Cre+/+; Arg1fl/fl	1.37301e+08	7.82578e+07	1.24705e+08	40.3513	22.9992	36.6496
A35465	Plasma	240	Lyz2-Cre+/+; Arg1fl/fl	1.05721e+08	8.5081e+07	1.36916e+08	32.2596	25.9617	41.7787
A35465	Plasma	30	Lyz2-Cre+/+; Arg1fl/fl	1.26585e+08	6.87712e+07	1.14722e+08	40.8236	22.1787	36.9977
A35469	Plasma	0	Lyz2-Cre+/+; Arg1fl/fl	5.88676e+07	0	0	100	0	0
A35469	Plasma	120	Lyz2-Cre+/+; Arg1fl/fl	9.0898e+07	7.17857e+07	1.81665e+08	26.3971	20.8468	52.7561
A35469	Plasma	240	Lyz2-Cre+/+; Arg1fl/fl	8.58422e+07	9.35395e+07	2.06691e+08	22.2348	24.2285	53.5367
A35469	Plasma	30	Lyz2-Cre+/+; Arg1fl/fl	9.46319e+07	6.11116e+07	1.59133e+08	30.0537	19.4081	50.5382

## Sheet: Aspartate
Aspartate
C4H7NO4
				Natural abundance corrected peak area		Natural abundance corrected percentages
Mouse ID	Sample type	Time of collection (min)	Genotype	M+0	M+1	M+0	M+1
A35096	Tumor	240	Arg1fl/fl	3.02356e+08	9.15944e+07	76.7497	23.2503
A35097	Tumor	240	Arg1fl/fl	1.95611e+08	5.42512e+07	78.2876	21.7124
A35098	Tumor	240	Arg1fl/fl	1.79764e+08	5.05332e+07	78.0574	21.9426
785	Tumor	240	Lyz2-Cre+/+; Arg1fl/fl	9.71814e+07	2.10612e+07	82.1881	17.8119
787	Tumor	240	Lyz2-Cre+/+; Arg1fl/fl	2.00931e+08	6.53682e+07	75.4531	24.5469
788	Tumor	240	Lyz2-Cre+/+; Arg1fl/fl	6.83554e+07	1.39959e+07	83.0046	16.9954
789	Tumor	240	Lyz2-Cre+/+; Arg1fl/fl	2.15e+08	4.93091e+07	81.3442	18.6558
A35089	Tumor	240	Lyz2-Cre+/+; Arg1fl/fl	1.52302e+08	4.44061e+07	77.4253	22.5747
A35465	Tumor	240	Lyz2-Cre+/+; Arg1fl/fl	2.0068e+08	5.55737e+07	78.313	21.687
A35466	Tumor	240	Lyz2-Cre+/+; Arg1fl/fl	1.27178e+08	3.82662e+07	76.8707	23.1293
A35469	Tumor	240	Lyz2-Cre+/+; Arg1fl/fl	1.55208e+08	4.4268e+07	77.8078	22.1922
A35096	Plasma	0	Arg1fl/fl	4.06475e+07	0	100	0
A35096	Plasma	120	Arg1fl/fl	7.23806e+07	0	100	0
A35096	Plasma	240	Arg1fl/fl	3.70112e+07	0	100	0
A35096	Plasma	30	Arg1fl/fl	6.66431e+07	0	100	0
A35097	Plasma	0	Arg1fl/fl	2.73082e+07	0	100	0
A35097	Plasma	120	Arg1fl/fl	5.61771e+07	0	100	0
A35097	Plasma	240	Arg1fl/fl	3.35044e+07	0	100	0
A35097	Plasma	30	Arg1fl/fl	5.96606e+07	0	100	0
A35098	Plasma	0	Arg1fl/fl	3.13511e+07	0	100	0
A35098	Plasma	120	Arg1fl/fl	6.19626e+07	0	100	0
A35098	Plasma	240	Arg1fl/fl	5.69779e+07	0	100	0
A35098	Plasma	30	Arg1fl/fl	6.133e+07	0	100	0
785	Plasma	0	Lyz2-Cre+/+; Arg1fl/fl	3.12702e+07	0	100	0
785	Plasma	120	Lyz2-Cre+/+; Arg1fl/fl	6.15513e+07	0	100	0
785	Plasma	240	Lyz2-Cre+/+; Arg1fl/fl	3.8922e+07	0	100	0
785	Plasma	30	Lyz2-Cre+/+; Arg1fl/fl	6.2212e+07	0	100	0
787	Plasma	0	Lyz2-Cre+/+; Arg1fl/fl	3.57566e+07	0	100	0
787	Plasma	120	Lyz2-Cre+/+; Arg1fl/fl	6.79286e+07	0	100	0
787	Plasma	240	Lyz2-Cre+/+; Arg1fl/fl	3.26416e+07	0	100	0
787	Plasma	30	Lyz2-Cre+/+; Arg1fl/fl	5.65885e+07	0	100	0
788	Plasma	0	Lyz2-Cre+/+; Arg1fl/fl	3.23089e+07	0	100	0
788	Plasma	120	Lyz2-Cre+/+; Arg1fl/fl	6.12162e+07	0	100	0
788	Plasma	240	Lyz2-Cre+/+; Arg1fl/fl	2.82775e+07	0	100	0
788	Plasma	30	Lyz2-Cre+/+; Arg1fl/fl	5.4457e+07	0	100	0
789	Plasma	0	Lyz2-Cre+/+; Arg1fl/fl	2.53813e+07	0	100	0
789	Plasma	120	Lyz2-Cre+/+; Arg1fl/fl	4.20375e+07	7633.03	99.9818	0.0181544
789	Plasma	240	Lyz2-Cre+/+; Arg1fl/fl	2.20359e+07	0	100	0
789	Plasma	30	Lyz2-Cre+/+; Arg1fl/fl	5.18649e+07	0	100	0
A35066	Plasma	0	Lyz2-Cre+/+; Arg1fl/fl	4.00033e+07	0	100	0
A35066	Plasma	120	Lyz2-Cre+/+; Arg1fl/fl	8.0445e+07	0	100	0
A35066	Plasma	240	Lyz2-Cre+/+; Arg1fl/fl	4.60402e+07	0	100	0
A35066	Plasma	30	Lyz2-Cre+/+; Arg1fl/fl	7.15235e+07	0	100	0
A35089	Plasma	0	Lyz2-Cre+/+; Arg1fl/fl	3.85708e+07	0	100	0
A35089	Plasma	120	Lyz2-Cre+/+; Arg1fl/fl	9.04658e+07	0	100	0
A35089	Plasma	240	Lyz2-Cre+/+; Arg1fl/fl	4.72426e+07	0	100	0
A35089	Plasma	30	Lyz2-Cre+/+; Arg1fl/fl	8.64885e+07	0	100	0
A35465	Plasma	0	Lyz2-Cre+/+; Arg1fl/fl	2.77423e+07	0	100	0
A35465	Plasma	120	Lyz2-Cre+/+; Arg1fl/fl	6.98632e+07	0	100	0
A35465	Plasma	240	Lyz2-Cre+/+; Arg1fl/fl	4.6922e+07	0	100	0
A35465	Plasma	30	Lyz2-Cre+/+; Arg1fl/fl	5.50972e+07	0	100	0
A35469	Plasma	0	Lyz2-Cre+/+; Arg1fl/fl	3.51905e+07	0	100	0
A35469	Plasma	120	Lyz2-Cre+/+; Arg1fl/fl	5.7609e+07	0	100	0
A35469	Plasma	240	Lyz2-Cre+/+; Arg1fl/fl	4.70807e+07	0	100	0
A35469	Plasma	30	Lyz2-Cre+/+; Arg1fl/fl	8.39155e+07	0	100	0

## Sheet: Citrulline
Citrulline
C6H13N3O3
				Natural abundance corrected peak area				Natural abundance corrected percentages
Mouse ID	Sample type	Time of collection (min)	Genotype	M+0	M+1	M+2	M+3	M+0	M+1	M+2	M+3
A35096	Tumor	240	Arg1fl/fl	1.06726e+08	4.38083e+07	1.40155e+07	2.02206e+06	64.0721	26.2999	8.41408	1.21392
A35097	Tumor	240	Arg1fl/fl	9.23936e+07	3.9848e+07	1.35555e+07	2.11381e+06	62.4657	26.9406	9.16463	1.42911
A35098	Tumor	240	Arg1fl/fl	6.63669e+07	3.09545e+07	9.86349e+06	1.73549e+06	60.9316	28.4194	9.05569	1.59336
785	Tumor	240	Lyz2-Cre+/+; Arg1fl/fl	1.5261e+08	5.33553e+07	2.36125e+07	4.81621e+06	65.1084	22.763	10.0738	2.05474
787	Tumor	240	Lyz2-Cre+/+; Arg1fl/fl	6.47539e+07	4.81966e+07	2.85289e+07	7.57837e+06	43.4422	32.3342	19.1395	5.08418
788	Tumor	240	Lyz2-Cre+/+; Arg1fl/fl	1.77514e+08	3.99376e+07	1.65573e+07	3.89417e+06	74.6161	16.7874	6.95969	1.63687
789	Tumor	240	Lyz2-Cre+/+; Arg1fl/fl	9.42913e+07	5.05038e+07	1.51795e+07	1.73817e+06	58.3079	31.2305	9.38671	1.07485
A35089	Tumor	240	Lyz2-Cre+/+; Arg1fl/fl	9.75369e+07	3.31586e+07	1.29673e+07	2.6366e+06	66.6694	22.6649	8.86353	1.80219
A35465	Tumor	240	Lyz2-Cre+/+; Arg1fl/fl	1.35444e+08	6.59722e+07	2.6571e+07	4.84845e+06	58.1716	28.3342	11.4119	2.08234
A35466	Tumor	240	Lyz2-Cre+/+; Arg1fl/fl	7.17734e+07	2.46602e+07	1.30338e+07	3.07658e+06	63.7737	21.9116	11.581	2.73367
A35469	Tumor	240	Lyz2-Cre+/+; Arg1fl/fl	8.66757e+07	3.37893e+07	1.87958e+07	5.14078e+06	60.0241	23.3995	13.0163	3.56006
A35096	Plasma	0	Arg1fl/fl	1.7609e+08	0	0	0	100	0	0	0
A35096	Plasma	120	Arg1fl/fl	6.11451e+07	5.3522e+07	2.10847e+07	3.43159e+06	43.9313	38.4543	15.1489	2.46552
A35096	Plasma	240	Arg1fl/fl	5.51146e+07	5.10578e+07	1.85091e+07	3.1308e+06	43.1215	39.9475	14.4815	2.44953
A35096	Plasma	30	Arg1fl/fl	1.01914e+08	5.46271e+07	1.43037e+07	2.14397e+06	58.9137	31.5783	8.26856	1.23937
A35097	Plasma	0	Arg1fl/fl	9.17597e+07	0	0	0	100	0	0	0
A35097	Plasma	120	Arg1fl/fl	7.38367e+07	6.74602e+07	2.46784e+07	4.28059e+06	43.3681	39.6228	14.4949	2.51421
A35097	Plasma	240	Arg1fl/fl	5.57644e+07	5.34136e+07	1.92547e+07	3.19493e+06	42.3653	40.5794	14.6281	2.42725
A35097	Plasma	30	Arg1fl/fl	5.78316e+07	3.66846e+07	1.34696e+07	2.56802e+06	52.3108	33.1826	12.1838	2.32287
A35098	Plasma	0	Arg1fl/fl	1.36304e+08	0	0	0	100	0	0	0
A35098	Plasma	120	Arg1fl/fl	4.8883e+07	5.07346e+07	2.06473e+07	4.02078e+06	39.3312	40.8209	16.6128	3.23511
A35098	Plasma	240	Arg1fl/fl	5.52203e+07	5.78199e+07	2.01168e+07	3.65225e+06	40.363	42.2632	14.7043	2.66959
A35098	Plasma	30	Arg1fl/fl	5.02928e+07	4.39482e+07	1.99753e+07	5.07771e+06	42.1587	36.8402	16.7446	4.25646
785	Plasma	0	Lyz2-Cre+/+; Arg1fl/fl	1.53739e+08	0	0	0	100	0	0	0
785	Plasma	120	Lyz2-Cre+/+; Arg1fl/fl	9.47244e+07	1.03385e+08	4.14038e+07	7.27867e+06	38.3823	41.8916	16.7768	2.94932
785	Plasma	240	Lyz2-Cre+/+; Arg1fl/fl	4.92167e+07	6.94688e+07	3.93511e+07	9.68965e+06	29.3435	41.4179	23.4615	5.77706
785	Plasma	30	Lyz2-Cre+/+; Arg1fl/fl	8.84599e+07	6.79339e+07	2.33268e+07	3.75928e+06	48.2123	37.0252	12.7135	2.04888
787	Plasma	0	Lyz2-Cre+/+; Arg1fl/fl	1.58522e+08	0	0	0	100	0	0	0
787	Plasma	120	Lyz2-Cre+/+; Arg1fl/fl	7.46251e+07	9.93788e+07	6.03575e+07	1.77987e+07	29.5943	39.411	23.9362	7.05848
787	Plasma	240	Lyz2-Cre+/+; Arg1fl/fl	5.689e+07	8.86996e+07	5.51625e+07	1.70707e+07	26.1176	40.721	25.3245	7.83697
787	Plasma	30	Lyz2-Cre+/+; Arg1fl/fl	7.08127e+07	5.21378e+07	2.81737e+07	8.79245e+06	44.281	32.6031	17.6177	5.49815
788	Plasma	0	Lyz2-Cre+/+; Arg1fl/fl	1.16848e+08	0	0	0	100	0	0	0
788	Plasma	120	Lyz2-Cre+/+; Arg1fl/fl	9.96011e+07	8.53185e+07	3.2245e+07	6.36826e+06	44.5577	38.1682	14.4252	2.84891
788	Plasma	240	Lyz2-Cre+/+; Arg1fl/fl	7.28375e+07	8.49841e+07	4.30774e+07	1.29557e+07	34.0593	39.7392	20.1433	6.05817
788	Plasma	30	Lyz2-Cre+/+; Arg1fl/fl	9.09054e+07	6.0242e+07	2.21003e+07	4.89304e+06	51.0301	33.8171	12.4061	2.74672
789	Plasma	0	Lyz2-Cre+/+; Arg1fl/fl	1.60618e+08	0	0	0	100	0	0	0
789	Plasma	120	Lyz2-Cre+/+; Arg1fl/fl	1.44178e+08	1.04935e+08	2.693e+07	3.36603e+06	51.6011	37.5561	9.63817	1.20469
789	Plasma	240	Lyz2-Cre+/+; Arg1fl/fl	6.93487e+07	6.52309e+07	2.15459e+07	3.21917e+06	43.5212	40.937	13.5216	2.02025
789	Plasma	30	Lyz2-Cre+/+; Arg1fl/fl	1.15426e+08	7.44191e+07	2.47673e+07	3.75322e+06	52.859	34.0801	11.3421	1.71878
A35066	Plasma	0	Lyz2-Cre+/+; Arg1fl/fl	1.49402e+08	0	0	0	100	0	0	0
A35066	Plasma	120	Lyz2-Cre+/+; Arg1fl/fl	5.06492e+07	5.48774e+07	2.62806e+07	5.28285e+06	36.9459	40.0302	19.1703	3.85356
A35066	Plasma	240	Lyz2-Cre+/+; Arg1fl/fl	3.57817e+07	5.1799e+07	3.42634e+07	9.56223e+06	27.2298	39.4189	26.0744	7.27684
A35066	Plasma	30	Lyz2-Cre+/+; Arg1fl/fl	5.98393e+07	4.33282e+07	1.70909e+07	3.41269e+06	48.3858	35.035	13.8196	2.75949
A35089	Plasma	0	Lyz2-Cre+/+; Arg1fl/fl	1.26596e+08	0	0	0	100	0	0	0
A35089	Plasma	120	Lyz2-Cre+/+; Arg1fl/fl	5.8482e+07	5.33739e+07	1.97189e+07	3.44389e+06	43.314	39.5308	14.6046	2.55068
A35089	Plasma	240	Lyz2-Cre+/+; Arg1fl/fl	3.6996e+07	4.4585e+07	2.12915e+07	4.6266e+06	34.4152	41.4748	19.8062	4.30385
A35089	Plasma	30	Lyz2-Cre+/+; Arg1fl/fl	8.66326e+07	5.90469e+07	2.31279e+07	4.76812e+06	49.9106	34.018	13.3244	2.747
A35465	Plasma	0	Lyz2-Cre+/+; Arg1fl/fl	1.46559e+08	0	0	0	100	0	0	0
A35465	Plasma	120	Lyz2-Cre+/+; Arg1fl/fl	1.09615e+08	8.42653e+07	2.5924e+07	3.35828e+06	49.1189	37.7596	11.6166	1.50486
A35465	Plasma	240	Lyz2-Cre+/+; Arg1fl/fl	8.50454e+07	9.50087e+07	4.42046e+07	8.74559e+06	36.4995	40.7755	18.9716	3.7534
A35465	Plasma	30	Lyz2-Cre+/+; Arg1fl/fl	8.47561e+07	5.78718e+07	2.31071e+07	4.2306e+06	49.8666	34.0491	13.5952	2.48909
A35469	Plasma	0	Lyz2-Cre+/+; Arg1fl/fl	1.42108e+08	0	0	0	100	0	0	0
A35469	Plasma	120	Lyz2-Cre+/+; Arg1fl/fl	7.06995e+07	7.11602e+07	3.55278e+07	9.72589e+06	37.7843	38.0305	18.9873	5.19786
A35469	Plasma	240	Lyz2-Cre+/+; Arg1fl/fl	5.44536e+07	7.33015e+07	4.4724e+07	1.47278e+07	29.0874	39.1553	23.8902	7.86713
A35469	Plasma	30	Lyz2-Cre+/+; Arg1fl/fl	8.65284e+07	6.18468e+07	2.79926e+07	7.48107e+06	47.065	33.64	15.2259	4.06914

## Sheet: Glutamate
Glutamate
C5H9NO4
				Natural abundance corrected peak area		Natural abundance corrected percentages
Mouse ID	Sample type	Time of collection (min)	Genotype	M+0	M+1	M+0	M+1
A35096	Tumor	240	Arg1fl/fl	3.6731e+09	1.11392e+09	76.7304	23.2696
A35097	Tumor	240	Arg1fl/fl	3.32256e+09	8.71755e+08	79.2158	20.7842
A35098	Tumor	240	Arg1fl/fl	3.0701e+09	8.49048e+08	78.3359	21.6641
785	Tumor	240	Lyz2-Cre+/+; Arg1fl/fl	2.02386e+09	5.36184e+08	79.0557	20.9443
787	Tumor	240	Lyz2-Cre+/+; Arg1fl/fl	2.35844e+09	7.29598e+08	76.3734	23.6266
788	Tumor	240	Lyz2-Cre+/+; Arg1fl/fl	1.39466e+09	2.81033e+08	83.2288	16.7712
789	Tumor	240	Lyz2-Cre+/+; Arg1fl/fl	2.8534e+09	6.37941e+08	81.7279	18.2721
A35089	Tumor	240	Lyz2-Cre+/+; Arg1fl/fl	2.62537e+09	7.67026e+08	77.3899	22.6101
A35465	Tumor	240	Lyz2-Cre+/+; Arg1fl/fl	3.6989e+09	1.05435e+09	77.8184	22.1816
A35466	Tumor	240	Lyz2-Cre+/+; Arg1fl/fl	2.37586e+09	7.12066e+08	76.9403	23.0597
A35469	Tumor	240	Lyz2-Cre+/+; Arg1fl/fl	3.03958e+09	8.45314e+08	78.241	21.759
A35096	Plasma	0	Arg1fl/fl	3.37464e+07	0	100	0
A35096	Plasma	120	Arg1fl/fl	2.20343e+07	4.95709e+06	81.6346	18.3654
A35096	Plasma	240	Arg1fl/fl	1.34822e+07	3.37799e+06	79.9647	20.0353
A35096	Plasma	30	Arg1fl/fl	2.37605e+07	3.7867e+06	86.2537	13.7463
A35097	Plasma	0	Arg1fl/fl	1.4109e+07	0	100	0
A35097	Plasma	120	Arg1fl/fl	2.03466e+07	4.24573e+06	82.7356	17.2644
A35097	Plasma	240	Arg1fl/fl	1.61111e+07	4.41833e+06	78.4781	21.5219
A35097	Plasma	30	Arg1fl/fl	1.62703e+07	2.65311e+06	85.9797	14.0203
A35098	Plasma	0	Arg1fl/fl	3.4386e+07	0	100	0
A35098	Plasma	120	Arg1fl/fl	1.72247e+07	4.13277e+06	80.6495	19.3505
A35098	Plasma	240	Arg1fl/fl	1.7168e+07	4.84344e+06	77.9958	22.0042
A35098	Plasma	30	Arg1fl/fl	2.23679e+07	4.29809e+06	83.8818	16.1182
785	Plasma	0	Lyz2-Cre+/+; Arg1fl/fl	2.8759e+07	0	100	0
785	Plasma	120	Lyz2-Cre+/+; Arg1fl/fl	2.51917e+07	6.81293e+06	78.7127	21.2873
785	Plasma	240	Lyz2-Cre+/+; Arg1fl/fl	1.23917e+07	4.30737e+06	74.2059	25.7941
785	Plasma	30	Lyz2-Cre+/+; Arg1fl/fl	3.23717e+07	5.50323e+06	85.47	14.53
787	Plasma	0	Lyz2-Cre+/+; Arg1fl/fl	2.52971e+07	102300	99.5972	0.402767
787	Plasma	120	Lyz2-Cre+/+; Arg1fl/fl	1.12807e+07	3.48374e+06	76.4045	23.5955
787	Plasma	240	Lyz2-Cre+/+; Arg1fl/fl	1.05092e+07	4.24538e+06	71.2267	28.7733
787	Plasma	30	Lyz2-Cre+/+; Arg1fl/fl	1.89633e+07	4.25539e+06	81.6726	18.3274
788	Plasma	0	Lyz2-Cre+/+; Arg1fl/fl	3.38988e+07	0	100	0
788	Plasma	120	Lyz2-Cre+/+; Arg1fl/fl	4.3867e+07	1.47037e+07	74.8958	25.1042
788	Plasma	240	Lyz2-Cre+/+; Arg1fl/fl	3.21689e+07	1.79068e+07	64.2406	35.7594
788	Plasma	30	Lyz2-Cre+/+; Arg1fl/fl	4.87845e+07	1.29053e+07	79.0803	20.9197
789	Plasma	0	Lyz2-Cre+/+; Arg1fl/fl	1.75513e+07	0	100	0
789	Plasma	120	Lyz2-Cre+/+; Arg1fl/fl	1.49238e+07	3.08968e+06	82.8479	17.1521
789	Plasma	240	Lyz2-Cre+/+; Arg1fl/fl	5.08814e+06	0	100	0
789	Plasma	30	Lyz2-Cre+/+; Arg1fl/fl	2.28891e+07	4.01403e+06	85.0797	14.9203
A35066	Plasma	0	Lyz2-Cre+/+; Arg1fl/fl	2.65887e+07	0	100	0
A35066	Plasma	120	Lyz2-Cre+/+; Arg1fl/fl	2.22489e+07	5.52688e+06	80.1018	19.8982
A35066	Plasma	240	Lyz2-Cre+/+; Arg1fl/fl	1.21127e+07	5.03911e+06	70.6205	29.3795
A35066	Plasma	30	Lyz2-Cre+/+; Arg1fl/fl	1.83233e+07	3.67923e+06	83.2782	16.7218
A35089	Plasma	0	Lyz2-Cre+/+; Arg1fl/fl	2.14618e+07	0	100	0
A35089	Plasma	120	Lyz2-Cre+/+; Arg1fl/fl	2.93839e+07	8.47147e+06	77.6215	22.3785
A35089	Plasma	240	Lyz2-Cre+/+; Arg1fl/fl	1.17644e+07	4.51101e+06	72.2832	27.7168
A35089	Plasma	30	Lyz2-Cre+/+; Arg1fl/fl	2.58887e+07	6.27106e+06	80.5003	19.4997
A35465	Plasma	0	Lyz2-Cre+/+; Arg1fl/fl	1.55517e+07	0	100	0
A35465	Plasma	120	Lyz2-Cre+/+; Arg1fl/fl	1.83511e+07	3.67405e+06	83.3189	16.6811
A35465	Plasma	240	Lyz2-Cre+/+; Arg1fl/fl	1.14029e+07	3.3029e+06	77.5401	22.4599
A35465	Plasma	30	Lyz2-Cre+/+; Arg1fl/fl	2.0213e+07	3.53407e+06	85.1179	14.8821
A35469	Plasma	0	Lyz2-Cre+/+; Arg1fl/fl	2.12422e+07	6535.22	99.9692	0.0307558
A35469	Plasma	120	Lyz2-Cre+/+; Arg1fl/fl	1.12845e+07	2.96561e+06	79.1889	20.8111
A35469	Plasma	240	Lyz2-Cre+/+; Arg1fl/fl	1.17683e+07	4.89922e+06	70.6062	29.3938
A35469	Plasma	30	Lyz2-Cre+/+; Arg1fl/fl	1.3683e+07	2.99759e+06	82.0295	17.9705

## Sheet: Argininosuccinate
Argininosuccinate
C10H18N4O6
				Natural abundance corrected peak area					Natural abundance corrected percentages
Mouse ID	Sample type	Time of collection (min)	Genotype	M+0	M+1	M+2	M+3	M+4	M+0	M+1	M+2	M+3	M+4
A35096	Tumor	240	Arg1fl/fl	8.76613e+06	2.67172e+06	525889	101543	0	72.6558	22.1439	4.3587	0.84161	0
A35097	Tumor	240	Arg1fl/fl	2.41612e+06	652954	305841	38374.6	0	70.7857	19.1298	8.96031	1.12427	0
A35098	Tumor	240	Arg1fl/fl	2.91246e+06	724105	285742	22711.1	0	73.8263	18.3549	7.24312	0.575691	0
785	Tumor	240	Lyz2-Cre+/+; Arg1fl/fl	6.45359e+06	1.42967e+06	456299	151133	0	76.0078	16.8381	5.37411	1.77998	0
787	Tumor	240	Lyz2-Cre+/+; Arg1fl/fl	2.91455e+06	1.10237e+06	869573	230303	0	56.9604	21.5442	16.9945	4.50093	0
788	Tumor	240	Lyz2-Cre+/+; Arg1fl/fl	5.02643e+06	1.09401e+06	353519	44051.5	0	77.116	16.7844	5.42373	0.675843	0
789	Tumor	240	Lyz2-Cre+/+; Arg1fl/fl	7.13918e+06	934501	597240	36475.8	0	81.9898	10.7323	6.859	0.418906	0
A35089	Tumor	240	Lyz2-Cre+/+; Arg1fl/fl	5.2058e+06	400343	421525	69542.6	0	85.38	6.566	6.91341	1.14056	0
A35465	Tumor	240	Lyz2-Cre+/+; Arg1fl/fl	1.21657e+07	2.91488e+06	1.0987e+06	129049	0	74.5981	17.8735	6.73705	0.791304	0
A35466	Tumor	240	Lyz2-Cre+/+; Arg1fl/fl	4.58483e+06	753041	546986	95740.6	0	76.6617	12.5914	9.14601	1.60085	0
A35469	Tumor	240	Lyz2-Cre+/+; Arg1fl/fl	7.51267e+06	773826	487039	316653	0	82.6459	8.51277	5.35786	3.48346	0

## Sheet: Arginine
Arginine
C6H14N4O2
				Natural abundance corrected peak area					Natural abundance corrected percentages
Mouse ID	Sample type	Time of collection (min)	Genotype	M+0	M+1	M+2	M+3	M+4	M+0	M+1	M+2	M+3
A35096	Tumor	240	Arg1fl/fl	1.50303e+08	1.49156e+07	5.84644e+06	1.25308e+06	165158	87.1407	8.64753	3.38957	0.726494
A35097	Tumor	240	Arg1fl/fl	2.47239e+08	2.15339e+07	9.59237e+06	2.08136e+06	262387	88.0766	7.67123	3.41719	0.741465
A35098	Tumor	240	Arg1fl/fl	1.87956e+08	1.46568e+07	6.40076e+06	1.41683e+06	208128	89.2316	6.95825	3.03874	0.672634
785	Tumor	240	Lyz2-Cre+/+; Arg1fl/fl	4.88225e+08	5.68241e+07	3.28473e+07	1.04337e+07	1.50123e+06	82.7736	9.63397	5.56893	1.76894
787	Tumor	240	Lyz2-Cre+/+; Arg1fl/fl	4.41094e+08	4.86668e+07	3.65454e+07	1.42126e+07	2.7487e+06	81.1928	8.95816	6.72696	2.61613
788	Tumor	240	Lyz2-Cre+/+; Arg1fl/fl	4.28441e+08	4.4733e+07	2.06739e+07	5.33345e+06	799052	85.6916	8.94695	4.13493	1.06673
789	Tumor	240	Lyz2-Cre+/+; Arg1fl/fl	7.69938e+08	8.00078e+07	3.32259e+07	7.01254e+06	694304	86.4246	8.98077	3.72957	0.787149
A35089	Tumor	240	Lyz2-Cre+/+; Arg1fl/fl	5.51949e+08	4.62023e+07	2.30978e+07	6.33819e+06	753973	87.8422	7.35307	3.67599	1.00872
A35465	Tumor	240	Lyz2-Cre+/+; Arg1fl/fl	6.27948e+08	8.06296e+07	3.99793e+07	1.07566e+07	1.23494e+06	82.5652	10.6015	5.25664	1.41432
A35466	Tumor	240	Lyz2-Cre+/+; Arg1fl/fl	5.09202e+08	4.08423e+07	2.4302e+07	8.50877e+06	1.35145e+06	87.1613	6.99107	4.15983	1.45646
A35469	Tumor	240	Lyz2-Cre+/+; Arg1fl/fl	3.95666e+08	2.90787e+07	1.80149e+07	6.71903e+06	1.21275e+06	87.7909	6.45203	3.99717	1.49083
A35096	Plasma	0	Arg1fl/fl	3.54501e+08	0	0	0	0	100	0	0	0
A35096	Plasma	120	Arg1fl/fl	1.43163e+08	2.15919e+07	9.46573e+06	2.21852e+06	279723	81.0118	12.2182	5.35637	1.25539
A35096	Plasma	240	Arg1fl/fl	2.83692e+08	4.59091e+07	1.97851e+07	4.34595e+06	561061	80.0727	12.9579	5.58437	1.22665
A35096	Plasma	30	Arg1fl/fl	4.8949e+08	4.69678e+07	1.42162e+07	2.51554e+06	217866	88.4502	8.48702	2.56885	0.454556
A35097	Plasma	0	Arg1fl/fl	2.65581e+08	0	0	0	0	100	0	0	0
A35097	Plasma	120	Arg1fl/fl	3.51873e+08	5.03125e+07	2.23006e+07	4.84419e+06	528485	81.8578	11.7044	5.18789	1.12693
A35097	Plasma	240	Arg1fl/fl	2.94167e+08	4.68293e+07	2.068e+07	4.60983e+06	567265	80.1865	12.7651	5.63714	1.25659
A35097	Plasma	30	Arg1fl/fl	3.02414e+08	3.03971e+07	1.26713e+07	3.15697e+06	406404	86.6402	8.70865	3.63028	0.904459
A35098	Plasma	0	Arg1fl/fl	3.35499e+08	0	0	0	0	100	0	0	0
A35098	Plasma	120	Arg1fl/fl	3.02728e+08	4.29162e+07	2.03577e+07	5.15846e+06	608384	81.4291	11.5438	5.47589	1.38754
A35098	Plasma	240	Arg1fl/fl	1.2881e+08	2.09374e+07	9.18522e+06	2.04264e+06	227113	79.9058	12.9883	5.69795	1.26713
A35098	Plasma	30	Arg1fl/fl	2.9615e+08	3.59503e+07	1.91455e+07	5.45359e+06	764147	82.8476	10.057	5.35593	1.52563
785	Plasma	0	Lyz2-Cre+/+; Arg1fl/fl	3.43402e+08	0	0	0	0	100	0	0	0
785	Plasma	120	Lyz2-Cre+/+; Arg1fl/fl	2.26953e+08	4.07684e+07	2.12738e+07	5.45645e+06	631375	76.9116	13.8159	7.20943	1.84912
785	Plasma	240	Lyz2-Cre+/+; Arg1fl/fl	3.49717e+08	7.31486e+07	4.88463e+07	1.56483e+07	2.55207e+06	71.3836	14.931	9.97042	3.19411
785	Plasma	30	Lyz2-Cre+/+; Arg1fl/fl	1.96254e+08	2.58556e+07	1.12617e+07	2.33308e+06	288040	83.1612	10.9561	4.77204	0.988623
787	Plasma	0	Lyz2-Cre+/+; Arg1fl/fl	3.4856e+08	0	2666.6	990.252	0	99.999	0	0.000765025	0.000284095
787	Plasma	120	Lyz2-Cre+/+; Arg1fl/fl	3.59502e+08	5.61572e+07	3.86437e+07	1.47499e+07	3.0059e+06	76.1562	11.8962	8.18621	3.12459
787	Plasma	240	Lyz2-Cre+/+; Arg1fl/fl	4.72399e+08	1.01947e+08	7.66855e+07	2.98211e+07	6.16971e+06	68.7603	14.839	11.162	4.34063
787	Plasma	30	Lyz2-Cre+/+; Arg1fl/fl	3.99617e+08	2.32156e+07	1.26904e+07	5.0295e+06	1.08728e+06	90.4848	5.25668	2.87347	1.13882
788	Plasma	0	Lyz2-Cre+/+; Arg1fl/fl	3.24463e+08	0	0	0	0	100	0	0	0
788	Plasma	120	Lyz2-Cre+/+; Arg1fl/fl	4.51117e+08	8.9502e+07	3.62289e+07	6.76915e+06	801456	77.1907	15.3147	6.19913	1.15827
788	Plasma	240	Lyz2-Cre+/+; Arg1fl/fl	3.9238e+08	1.07035e+08	5.98603e+07	1.49435e+07	2.37032e+06	68.0519	18.5635	10.3818	2.5917
788	Plasma	30	Lyz2-Cre+/+; Arg1fl/fl	4.3529e+08	5.46624e+07	2.19878e+07	4.3313e+06	665513	84.2056	10.5743	4.25347	0.837878
789	Plasma	0	Lyz2-Cre+/+; Arg1fl/fl	3.59715e+08	0	0	0	0	100	0	0	0
789	Plasma	120	Lyz2-Cre+/+; Arg1fl/fl	5.2467e+08	8.15935e+07	3.04636e+07	5.7771e+06	588897	81.5854	12.6877	4.73705	0.89833
789	Plasma	240	Lyz2-Cre+/+; Arg1fl/fl	2.90355e+08	5.19129e+07	2.23531e+07	4.75907e+06	497912	78.5002	14.0352	6.04339	1.28666
789	Plasma	30	Lyz2-Cre+/+; Arg1fl/fl	4.54401e+08	5.80796e+07	2.34451e+07	5.33641e+06	585277	83.8614	10.7188	4.32688	0.984855
A35066	Plasma	0	Lyz2-Cre+/+; Arg1fl/fl	2.5659e+08	0	0	0	0	100	0	0	0
A35066	Plasma	120	Lyz2-Cre+/+; Arg1fl/fl	4.21997e+08	5.60298e+07	3.04135e+07	8.55301e+06	1.18804e+06	81.4381	10.8128	5.86927	1.65058
A35066	Plasma	240	Lyz2-Cre+/+; Arg1fl/fl	3.42567e+08	5.24257e+07	3.68177e+07	1.3075e+07	2.31335e+06	76.6029	11.7231	8.23295	2.92376
A35066	Plasma	30	Lyz2-Cre+/+; Arg1fl/fl	3.51225e+08	3.40034e+07	1.58493e+07	4.44992e+06	630823	86.4749	8.37196	3.90224	1.09561
A35089	Plasma	0	Lyz2-Cre+/+; Arg1fl/fl	2.23366e+08	0	0	0	0	100	0	0	0
A35089	Plasma	120	Lyz2-Cre+/+; Arg1fl/fl	5.62659e+08	6.35107e+07	3.06589e+07	7.07881e+06	964448	84.6267	9.55232	4.61125	1.06469
A35089	Plasma	240	Lyz2-Cre+/+; Arg1fl/fl	3.66712e+08	4.97023e+07	2.77987e+07	7.58395e+06	1.19442e+06	80.9534	10.972	6.1367	1.67419
A35089	Plasma	30	Lyz2-Cre+/+; Arg1fl/fl	2.78856e+08	2.49916e+07	1.19002e+07	3.39779e+06	538035	87.2287	7.81762	3.7225	1.06286
A35465	Plasma	0	Lyz2-Cre+/+; Arg1fl/fl	3.28138e+08	0	0	0	0	100	0	0	0
A35465	Plasma	120	Lyz2-Cre+/+; Arg1fl/fl	2.33227e+08	3.573e+07	1.35537e+07	2.71384e+06	247706	81.6987	12.5161	4.7478	0.950649
A35465	Plasma	240	Lyz2-Cre+/+; Arg1fl/fl	2.11077e+08	4.07181e+07	2.18586e+07	6.14981e+06	849394	75.2093	14.5083	7.78846	2.19125
A35465	Plasma	30	Lyz2-Cre+/+; Arg1fl/fl	3.39556e+08	3.84457e+07	1.85589e+07	5.05227e+06	716437	84.3975	9.55579	4.61287	1.25576
A35469	Plasma	0	Lyz2-Cre+/+; Arg1fl/fl	2.26805e+08	0	0	0	0	100	0	0	0
A35469	Plasma	120	Lyz2-Cre+/+; Arg1fl/fl	4.542e+08	5.86945e+07	3.42332e+07	1.05362e+07	1.89229e+06	81.1715	10.4895	6.11791	1.88295
A35469	Plasma	240	Lyz2-Cre+/+; Arg1fl/fl	3.82522e+08	6.87226e+07	4.70696e+07	1.66767e+07	3.38557e+06	73.7923	13.2573	9.08019	3.2171
A35469	Plasma	30	Lyz2-Cre+/+; Arg1fl/fl	1.75532e+08	1.99258e+07	9.74039e+06	2.95732e+06	467091	84.1385	9.55114	4.66891	1.41755

## Sheet: Ornithine
Ornithine
C5H12N2O2
				Natural abundance corrected peak area			Natural abundance corrected percentages
Mouse ID	Sample type	Time of collection (min)	Genotype	M+0	M+1	M+2	M+0	M+1	M+2
A35096	Tumor	240	Arg1fl/fl	1.03963e+08	6.39737e+06	1.31815e+06	93.0913	5.72839	1.18031
A35097	Tumor	240	Arg1fl/fl	1.88262e+08	8.69002e+06	1.91436e+06	94.6676	4.36978	0.962639
A35098	Tumor	240	Arg1fl/fl	9.38962e+07	4.91527e+06	1.08342e+06	93.995	4.92044	1.08456
785	Tumor	240	Lyz2-Cre+/+; Arg1fl/fl	5.49051e+07	4.29949e+06	1.12448e+06	91.0094	7.12673	1.86391
787	Tumor	240	Lyz2-Cre+/+; Arg1fl/fl	7.69484e+07	8.73068e+06	3.13888e+06	86.6361	9.82985	3.53406
788	Tumor	240	Lyz2-Cre+/+; Arg1fl/fl	1.51786e+08	8.9445e+06	3.09312e+06	92.6521	5.45983	1.88808
789	Tumor	240	Lyz2-Cre+/+; Arg1fl/fl	1.16114e+08	8.36778e+06	1.33122e+06	92.2909	6.65096	1.05809
A35089	Tumor	240	Lyz2-Cre+/+; Arg1fl/fl	4.64622e+07	3.16439e+06	789726	92.1571	6.27652	1.56641
A35465	Tumor	240	Lyz2-Cre+/+; Arg1fl/fl	1.1728e+08	1.15872e+07	2.46576e+06	89.2998	8.82274	1.87749
A35466	Tumor	240	Lyz2-Cre+/+; Arg1fl/fl	9.72093e+07	7.63484e+06	2.34683e+06	90.688	7.12266	2.18939
A35469	Tumor	240	Lyz2-Cre+/+; Arg1fl/fl	1.22507e+08	7.39359e+06	2.67748e+06	92.4037	5.57679	2.01956
A35096	Plasma	0	Arg1fl/fl	8.24051e+07	0	0	100	0	0
A35096	Plasma	120	Arg1fl/fl	3.03095e+07	3.45975e+06	768990	87.7564	10.0172	2.22649
A35096	Plasma	240	Arg1fl/fl	1.81989e+07	2.05993e+06	434754	87.9446	9.95445	2.10091
A35096	Plasma	30	Arg1fl/fl	3.5019e+07	2.94594e+06	453122	91.1524	7.66812	1.17945
A35097	Plasma	0	Arg1fl/fl	1.60965e+07	0	0	100	0	0
A35097	Plasma	120	Arg1fl/fl	2.005e+07	1.87635e+06	443122	89.6311	8.38797	1.98092
A35097	Plasma	240	Arg1fl/fl	1.49662e+07	1.52515e+06	417338	88.5119	9.01994	2.46819
A35097	Plasma	30	Arg1fl/fl	1.70153e+07	1.35261e+06	346603	90.9204	7.22759	1.85205
A35098	Plasma	0	Arg1fl/fl	3.13247e+07	0	0	100	0	0
A35098	Plasma	120	Arg1fl/fl	4.39791e+07	4.42785e+06	1.10899e+06	88.8181	8.94228	2.23965
A35098	Plasma	240	Arg1fl/fl	2.48345e+07	2.5661e+06	629822	88.5984	9.1547	2.24693
A35098	Plasma	30	Arg1fl/fl	1.48138e+07	1.50085e+06	515190	88.021	8.91779	3.06118
785	Plasma	0	Lyz2-Cre+/+; Arg1fl/fl	31395702.647+E40+D+D2:F57	0	0	100	0	0
785	Plasma	120	Lyz2-Cre+/+; Arg1fl/fl	5.23371e+07	7.21346e+06	1.47017e+06	85.7694	11.8213	2.4093
785	Plasma	240	Lyz2-Cre+/+; Arg1fl/fl	1.90049e+07	4.26331e+06	1.24564e+06	77.5272	17.3914	5.08138
785	Plasma	30	Lyz2-Cre+/+; Arg1fl/fl	3.42808e+07	4.51243e+06	773007	86.6415	11.4048	1.95371
787	Plasma	0	Lyz2-Cre+/+; Arg1fl/fl	4.65657e+07	0	0	100	0	0
787	Plasma	120	Lyz2-Cre+/+; Arg1fl/fl	1.47563e+07	3.29149e+06	1.31461e+06	76.2111	16.9994	6.7895
787	Plasma	240	Lyz2-Cre+/+; Arg1fl/fl	1.97198e+07	5.59453e+06	2.06147e+06	72.0337	20.4361	7.53025
787	Plasma	30	Lyz2-Cre+/+; Arg1fl/fl	2.30104e+07	2.06576e+06	645116	89.4606	8.03134	2.5081
788	Plasma	0	Lyz2-Cre+/+; Arg1fl/fl	9.66125e+07	0	0	100	0	0
788	Plasma	120	Lyz2-Cre+/+; Arg1fl/fl	3.28808e+07	4.28384e+06	1.20725e+06	85.6898	11.164	3.14618
788	Plasma	240	Lyz2-Cre+/+; Arg1fl/fl	3.13398e+07	5.63432e+06	2.21196e+06	79.9769	14.3784	5.64475
788	Plasma	30	Lyz2-Cre+/+; Arg1fl/fl	3.66278e+07	3.86632e+06	1.18982e+06	87.8703	9.27534	2.85439
789	Plasma	0	Lyz2-Cre+/+; Arg1fl/fl	8.95774e+07	0	0	100	0	0
789	Plasma	120	Lyz2-Cre+/+; Arg1fl/fl	3.90905e+07	4.47527e+06	631645	88.4452	10.1257	1.42915
789	Plasma	240	Lyz2-Cre+/+; Arg1fl/fl	1.46354e+07	1.92775e+06	416058	86.196	11.3536	2.4504
789	Plasma	30	Lyz2-Cre+/+; Arg1fl/fl	2.97227e+07	4.08956e+06	640557	86.2708	11.87	1.85923
A35066	Plasma	0	Lyz2-Cre+/+; Arg1fl/fl	5.33912e+07	0	0	100	0	0
A35066	Plasma	120	Lyz2-Cre+/+; Arg1fl/fl	1.41068e+07	2.3601e+06	654318	82.3937	13.7846	3.82168
A35066	Plasma	240	Lyz2-Cre+/+; Arg1fl/fl	1.33596e+07	3.00727e+06	991647	76.9627	17.3245	5.71276
A35066	Plasma	30	Lyz2-Cre+/+; Arg1fl/fl	1.7084e+07	1.70147e+06	435258	88.8832	8.85228	2.26453
A35089	Plasma	0	Lyz2-Cre+/+; Arg1fl/fl	3.37406e+07	0	0	100	0	0
A35089	Plasma	120	Lyz2-Cre+/+; Arg1fl/fl	5.48948e+07	7.21613e+06	1.42306e+06	86.4023	11.3579	2.23984
A35089	Plasma	240	Lyz2-Cre+/+; Arg1fl/fl	1.46056e+07	2.40844e+06	673809	82.5742	13.6164	3.80945
A35089	Plasma	30	Lyz2-Cre+/+; Arg1fl/fl	3.51641e+07	3.35884e+06	832347	89.3504	8.53466	2.11495
A35465	Plasma	0	Lyz2-Cre+/+; Arg1fl/fl	6.15931e+07	0	0	100	0	0
A35465	Plasma	120	Lyz2-Cre+/+; Arg1fl/fl	4.99247e+07	7.26794e+06	1.13009e+06	85.6007	12.4616	1.93766
A35465	Plasma	240	Lyz2-Cre+/+; Arg1fl/fl	3.12352e+07	6.66526e+06	1.61082e+06	79.0538	16.8693	4.07688
A35465	Plasma	30	Lyz2-Cre+/+; Arg1fl/fl	4.58027e+07	6.8386e+06	1.32984e+06	84.8652	12.6708	2.46399
A35469	Plasma	0	Lyz2-Cre+/+; Arg1fl/fl	4.08865e+07	0	0	100	0	0
A35469	Plasma	120	Lyz2-Cre+/+; Arg1fl/fl	1.96718e+07	2.49563e+06	769870	85.7633	10.8802	3.35642
A35469	Plasma	240	Lyz2-Cre+/+; Arg1fl/fl	1.87887e+07	3.41192e+06	1.29797e+06	79.9567	14.5197	5.52363
A35469	Plasma	30	Lyz2-Cre+/+; Arg1fl/fl	3.02519e+07	2.61839e+06	867762	89.667	7.76095	2.57206

## Sheet: Carbamoyl aspartate
Carbamoyl aspartate
C5H8N2O5
				Natural abundance corrected peak area			Natural abundance corrected percentages
Mouse ID	Sample type	Time of collection (min)	Genotype	M+0	M+1	M+2	M+0	M+1	M+2
A35096	Tumor	240	Arg1fl/fl	4.33803e+06	2.60617e+06	479860	58.4321	35.1043	6.46358
A35097	Tumor	240	Arg1fl/fl	3.76438e+06	2.47135e+06	460084	56.2199	36.9089	6.87121
A35098	Tumor	240	Arg1fl/fl	3.25342e+06	2.95369e+06	607689	47.7405	43.3423	8.9172
785	Tumor	240	Lyz2-Cre+/+; Arg1fl/fl	461993	546756	151220	39.828	47.1354	13.0366
787	Tumor	240	Lyz2-Cre+/+; Arg1fl/fl	2.02297e+06	1.79106e+06	446376	47.483	42.0397	10.4773
788	Tumor	240	Lyz2-Cre+/+; Arg1fl/fl	457883	351478	80359.8	51.4637	39.5043	9.03202
789	Tumor	240	Lyz2-Cre+/+; Arg1fl/fl	3.42875e+06	2.61813e+06	388648	53.2784	40.6825	6.03911
A35089	Tumor	240	Lyz2-Cre+/+; Arg1fl/fl	1.85283e+06	1.29119e+06	238474	54.7771	38.1727	7.05023
A35465	Tumor	240	Lyz2-Cre+/+; Arg1fl/fl	3.06302e+06	2.77754e+06	564541	47.8216	43.3645	8.81392
A35466	Tumor	240	Lyz2-Cre+/+; Arg1fl/fl	1.72815e+06	1.46514e+06	318203	49.2141	41.7241	9.06176
A35469	Tumor	240	Lyz2-Cre+/+; Arg1fl/fl	1.0418e+07	5.34245e+06	876272	62.6204	32.1125	5.26711

## Sheet: Dihydroorotate
Dihydroorotate
C5H6N2O4
				Natural abundance corrected peak area			Natural abundance corrected percentages
Mouse ID	Sample type	Time of collection (min)	Genotype	M+0	M+1	M+2	M+0	M+1	M+2
A35096	Tumor	240	Arg1fl/fl	2.10744e+07	1.37298e+07	2.45875e+06	56.5559	36.8457	6.59839
A35097	Tumor	240	Arg1fl/fl	2.00921e+07	1.4795e+07	2.69187e+06	53.4663	39.3705	7.16323
A35098	Tumor	240	Arg1fl/fl	1.7349e+07	1.6306e+07	3.24311e+06	47.0187	44.1919	8.78938
785	Tumor	240	Lyz2-Cre+/+; Arg1fl/fl	1.43698e+06	1.90758e+06	482454	37.5483	49.8451	12.6066
787	Tumor	240	Lyz2-Cre+/+; Arg1fl/fl	8.74354e+06	8.69741e+06	2.1674e+06	44.5909	44.3557	11.0535
788	Tumor	240	Lyz2-Cre+/+; Arg1fl/fl	2.61062e+06	2.20559e+06	456489	49.5121	41.8304	8.65758
789	Tumor	240	Lyz2-Cre+/+; Arg1fl/fl	2.23505e+07	1.75727e+07	2.69412e+06	52.4447	41.2337	6.32167
A35089	Tumor	240	Lyz2-Cre+/+; Arg1fl/fl	8.53022e+06	6.39702e+06	1.16589e+06	53.0054	39.75	7.24465
A35465	Tumor	240	Lyz2-Cre+/+; Arg1fl/fl	1.56955e+07	1.5424e+07	3.01911e+06	45.9757	45.1806	8.84367
A35466	Tumor	240	Lyz2-Cre+/+; Arg1fl/fl	8.73609e+06	8.00336e+06	1.79837e+06	47.1258	43.1732	9.70108
A35469	Tumor	240	Lyz2-Cre+/+; Arg1fl/fl	3.59282e+07	1.97233e+07	3.1918e+06	61.0574	33.5183	5.42423

## Sheet: Orotate
Orotate
C5H4N2O4
				Natural abundance corrected peak area			Natural abundance corrected percentages
Mouse ID	Sample type	Time of collection (min)	Genotype	M+0	M+1	M+2	M+0	M+1	M+2
A35096	Tumor	240	Arg1fl/fl	1.44684e+07	9.8499e+06	1.87437e+06	55.2383	37.6056	7.1561
A35097	Tumor	240	Arg1fl/fl	1.44335e+07	8.28271e+06	1.49964e+06	59.6035	34.2037	6.19279
A35098	Tumor	240	Arg1fl/fl	1.31503e+07	1.08825e+07	2.10056e+06	50.3199	41.6422	8.03785
785	Tumor	240	Lyz2-Cre+/+; Arg1fl/fl	5.85184e+06	5.9059e+06	1.30446e+06	44.7998	45.2137	9.98652
787	Tumor	240	Lyz2-Cre+/+; Arg1fl/fl	2.19411e+07	1.98154e+07	4.81067e+06	47.1171	42.5522	10.3306
788	Tumor	240	Lyz2-Cre+/+; Arg1fl/fl	1.80263e+07	8.35395e+06	1.4393e+06	64.7973	30.029	5.17369
789	Tumor	240	Lyz2-Cre+/+; Arg1fl/fl	1.47978e+07	9.74576e+06	1.54974e+06	56.7112	37.3496	5.93921
A35089	Tumor	240	Lyz2-Cre+/+; Arg1fl/fl	9.84359e+06	7.12146e+06	1.47329e+06	53.3865	38.6231	7.99037
A35465	Tumor	240	Lyz2-Cre+/+; Arg1fl/fl	1.32618e+07	1.1524e+07	2.23729e+06	49.0758	42.645	8.2792
A35466	Tumor	240	Lyz2-Cre+/+; Arg1fl/fl	8.77443e+06	7.10886e+06	1.50541e+06	50.4605	40.8821	8.6574
A35469	Tumor	240	Lyz2-Cre+/+; Arg1fl/fl	2.45403e+07	1.49652e+07	2.71426e+06	58.1251	35.446	6.42889

[truncated: 4 more sheets: UMP, UDP, UTP, Putrescine]
