# Supplementary figures and images for: Pancreatic tumors exhibit myeloid-driven amino acid stress and upregulate arginine biosynthesis
Source: eLife journal article supplement (doi:10.7554/elife.81289), 2023-05-31

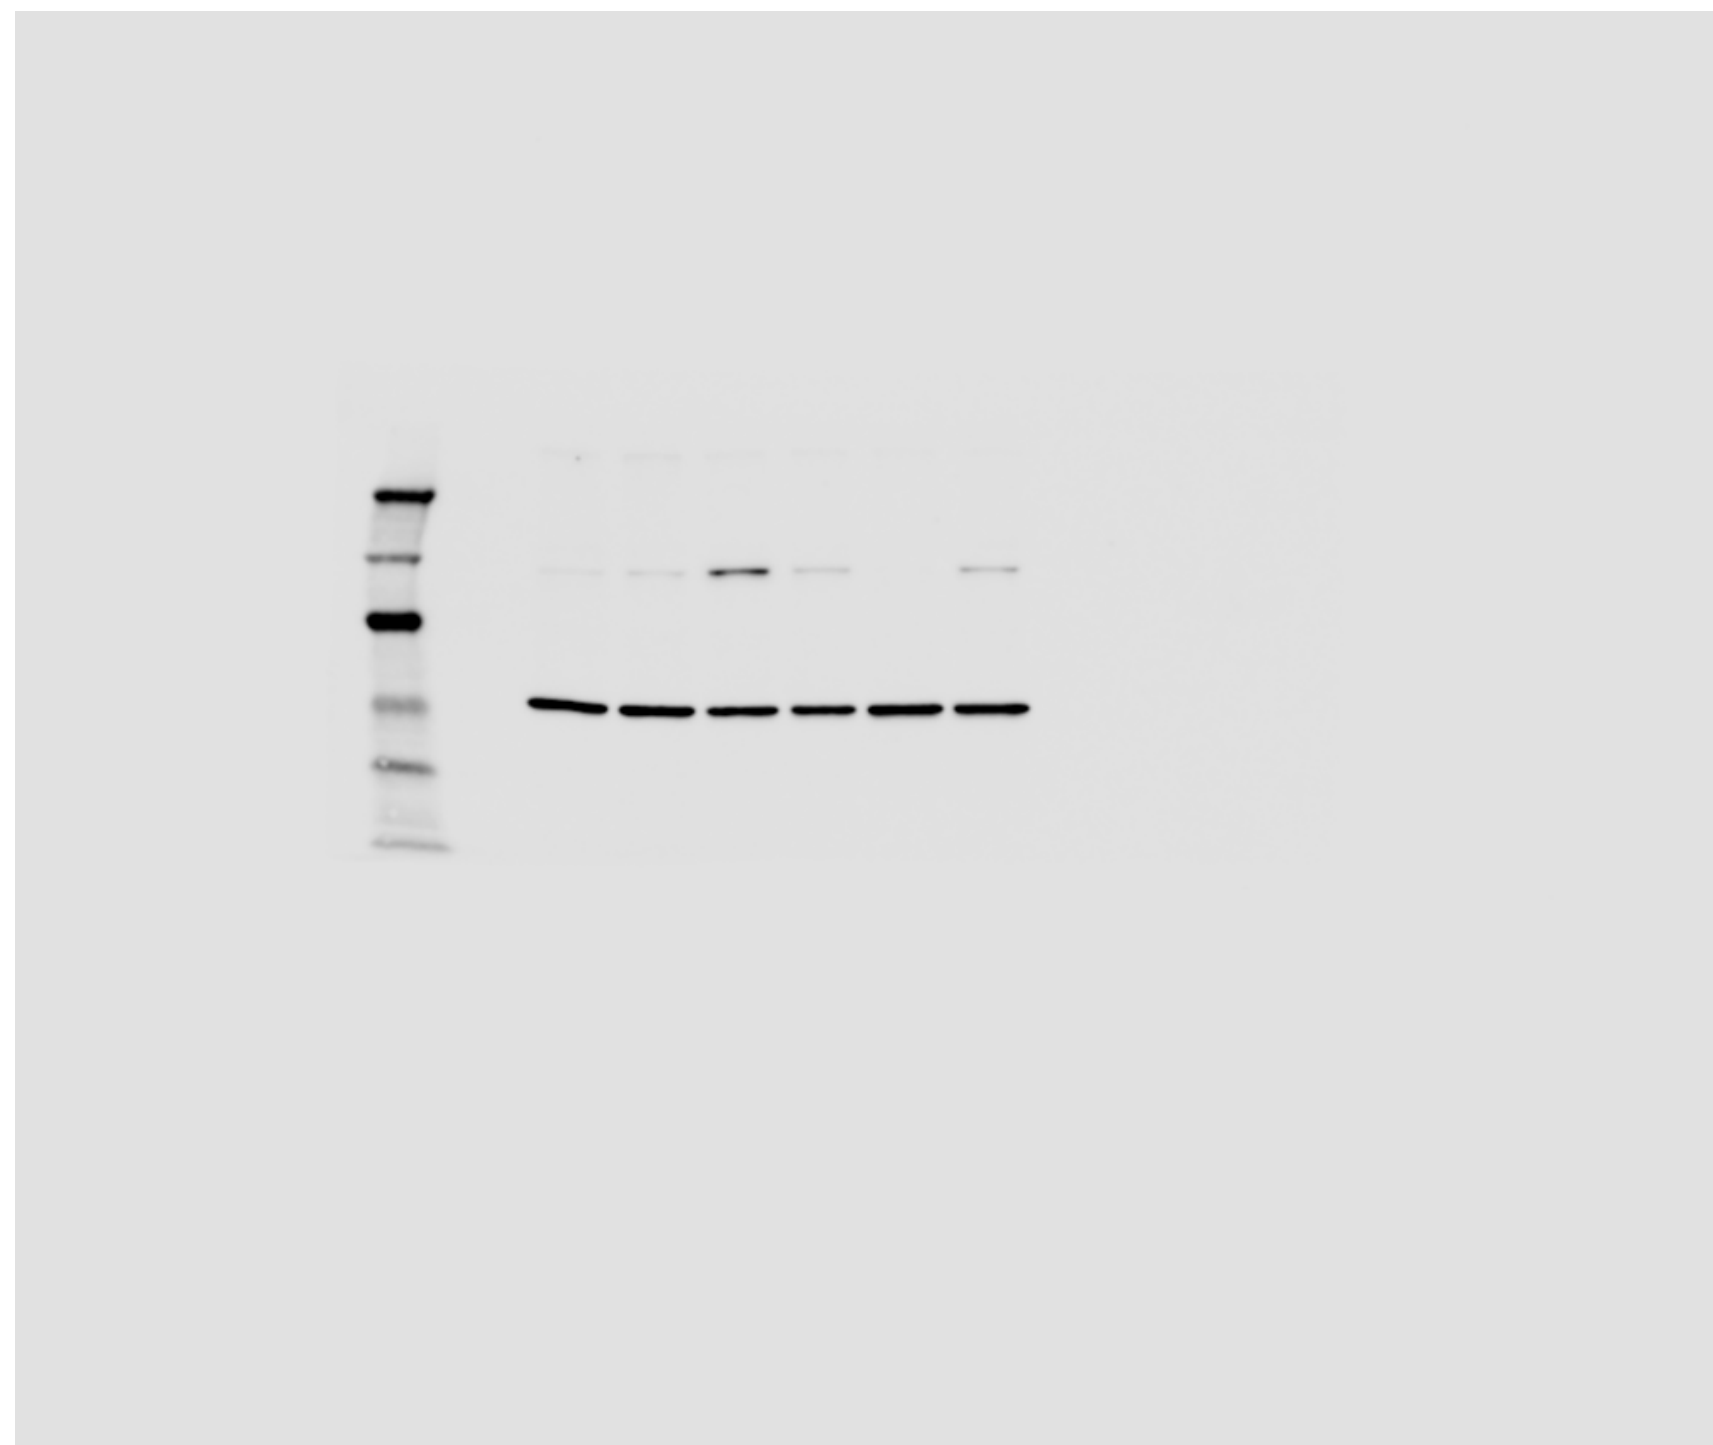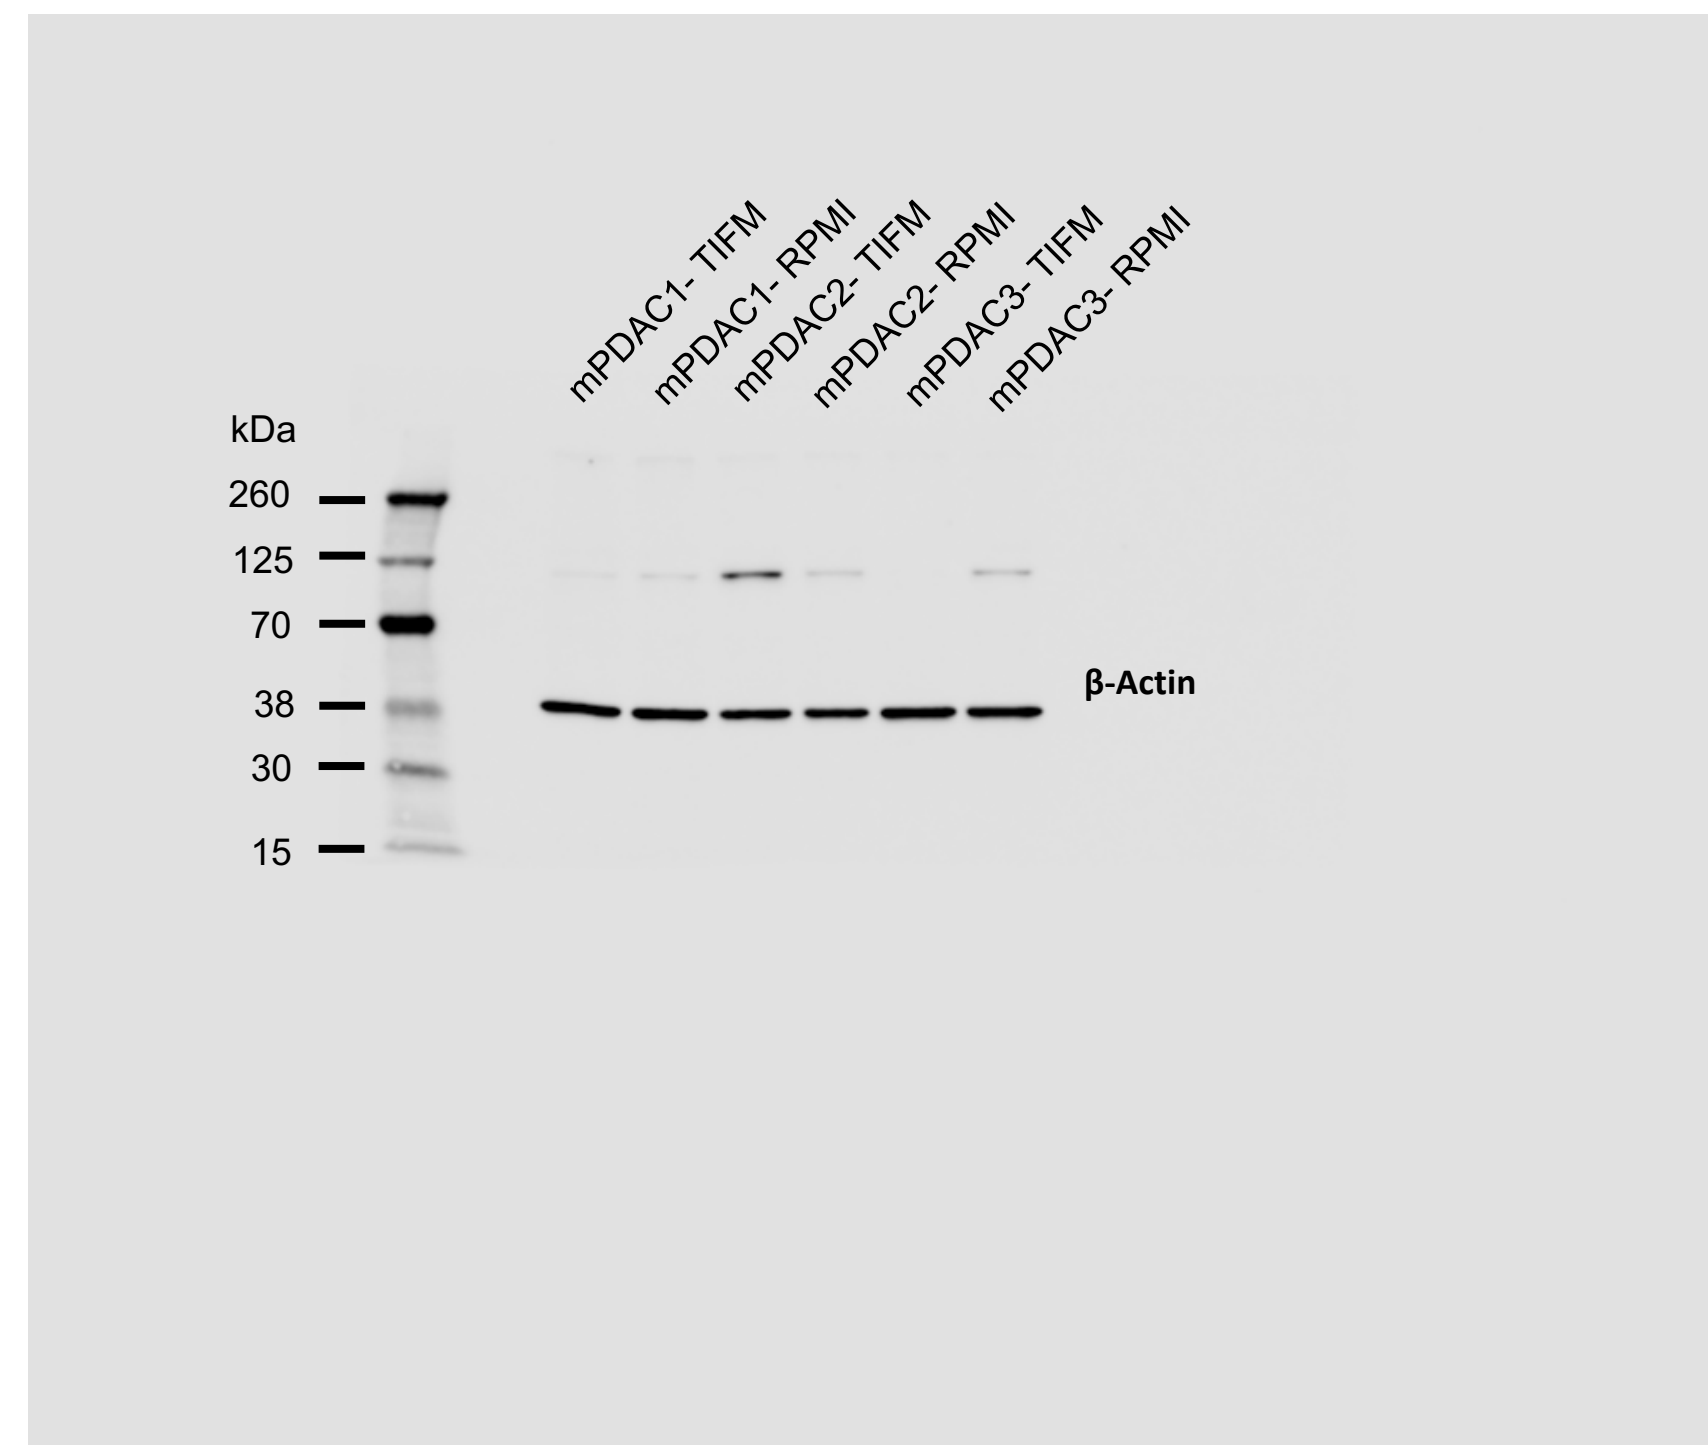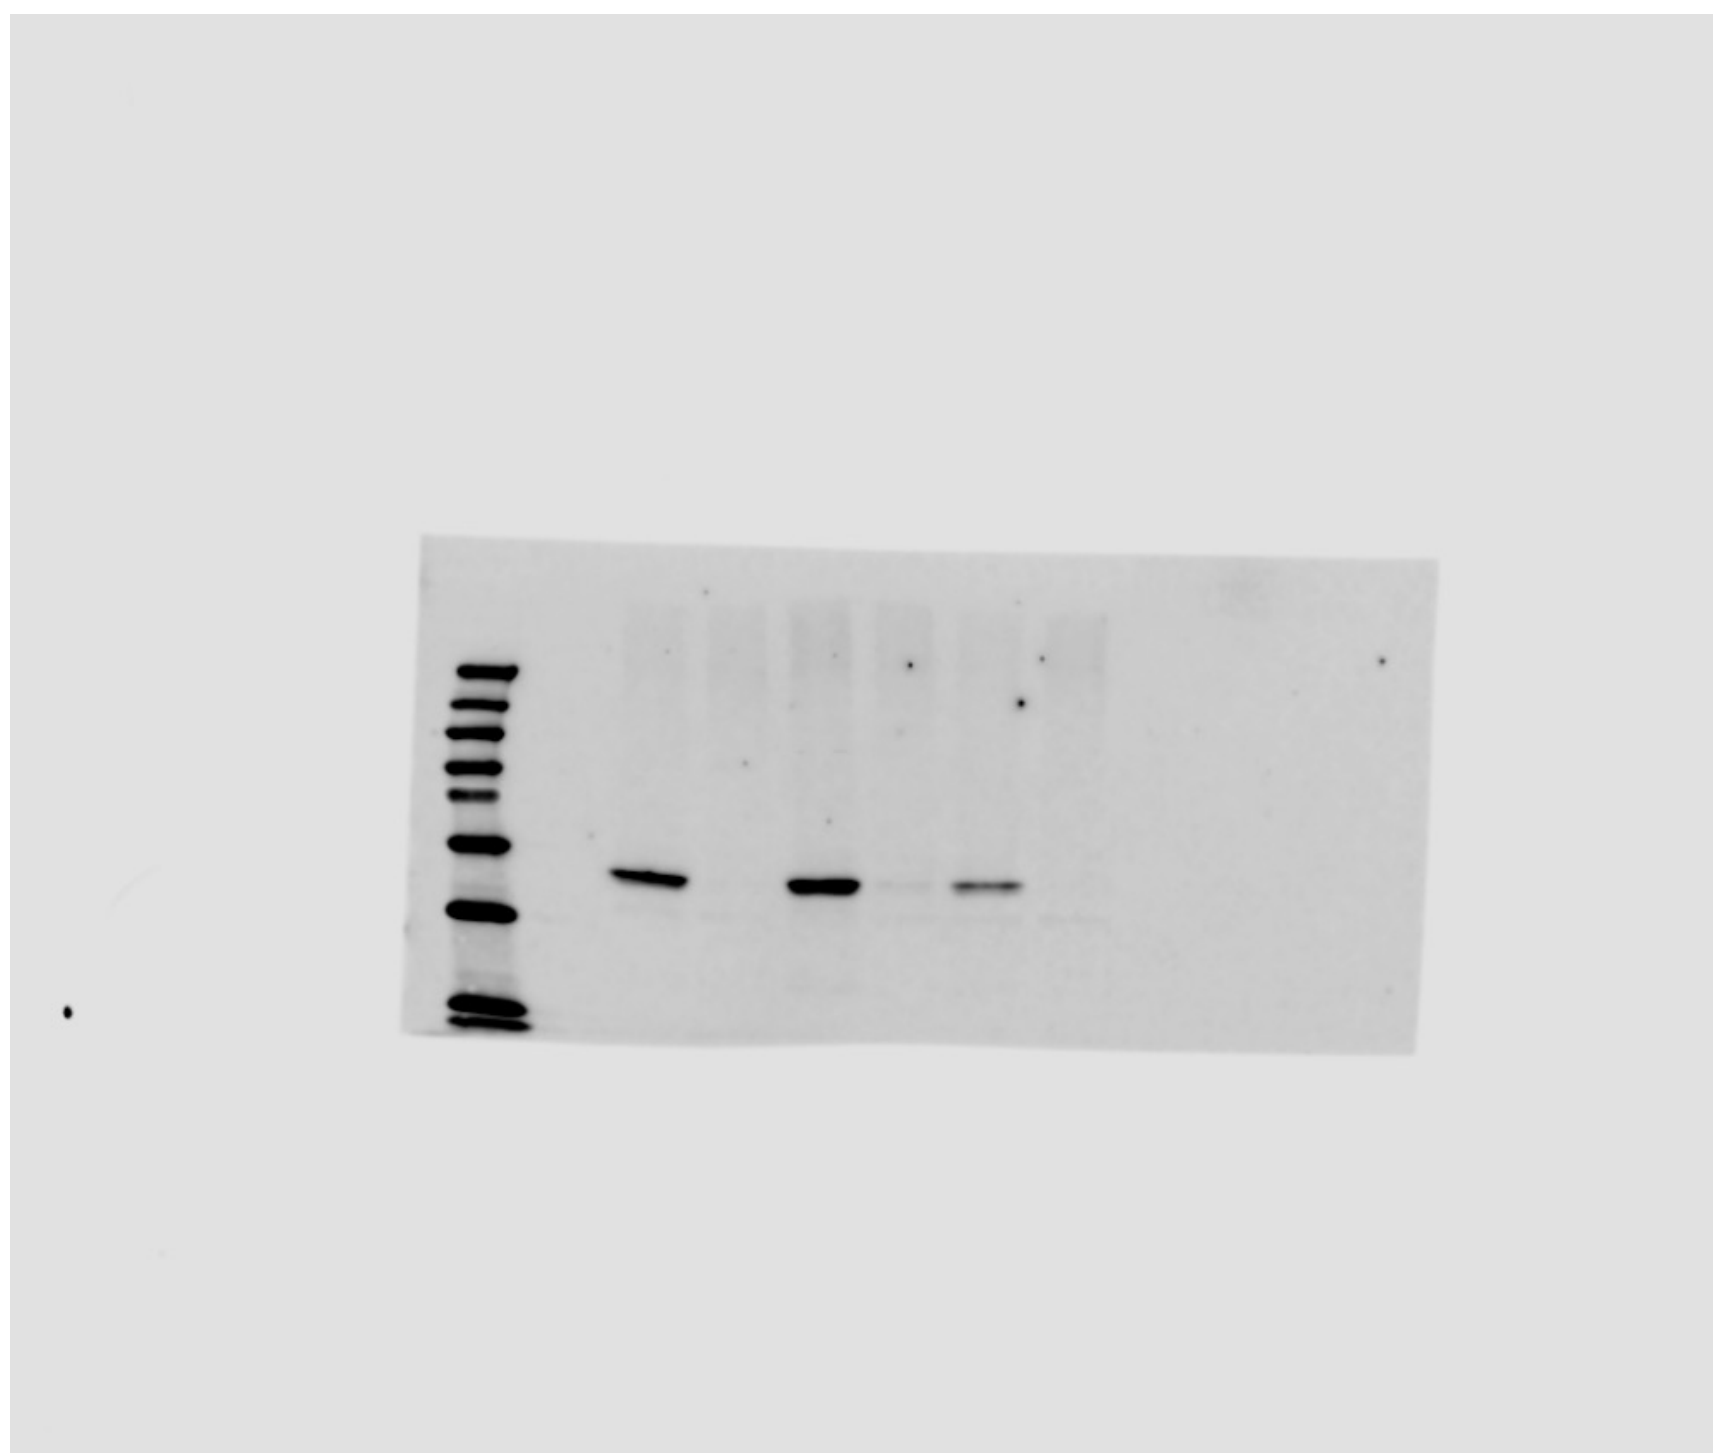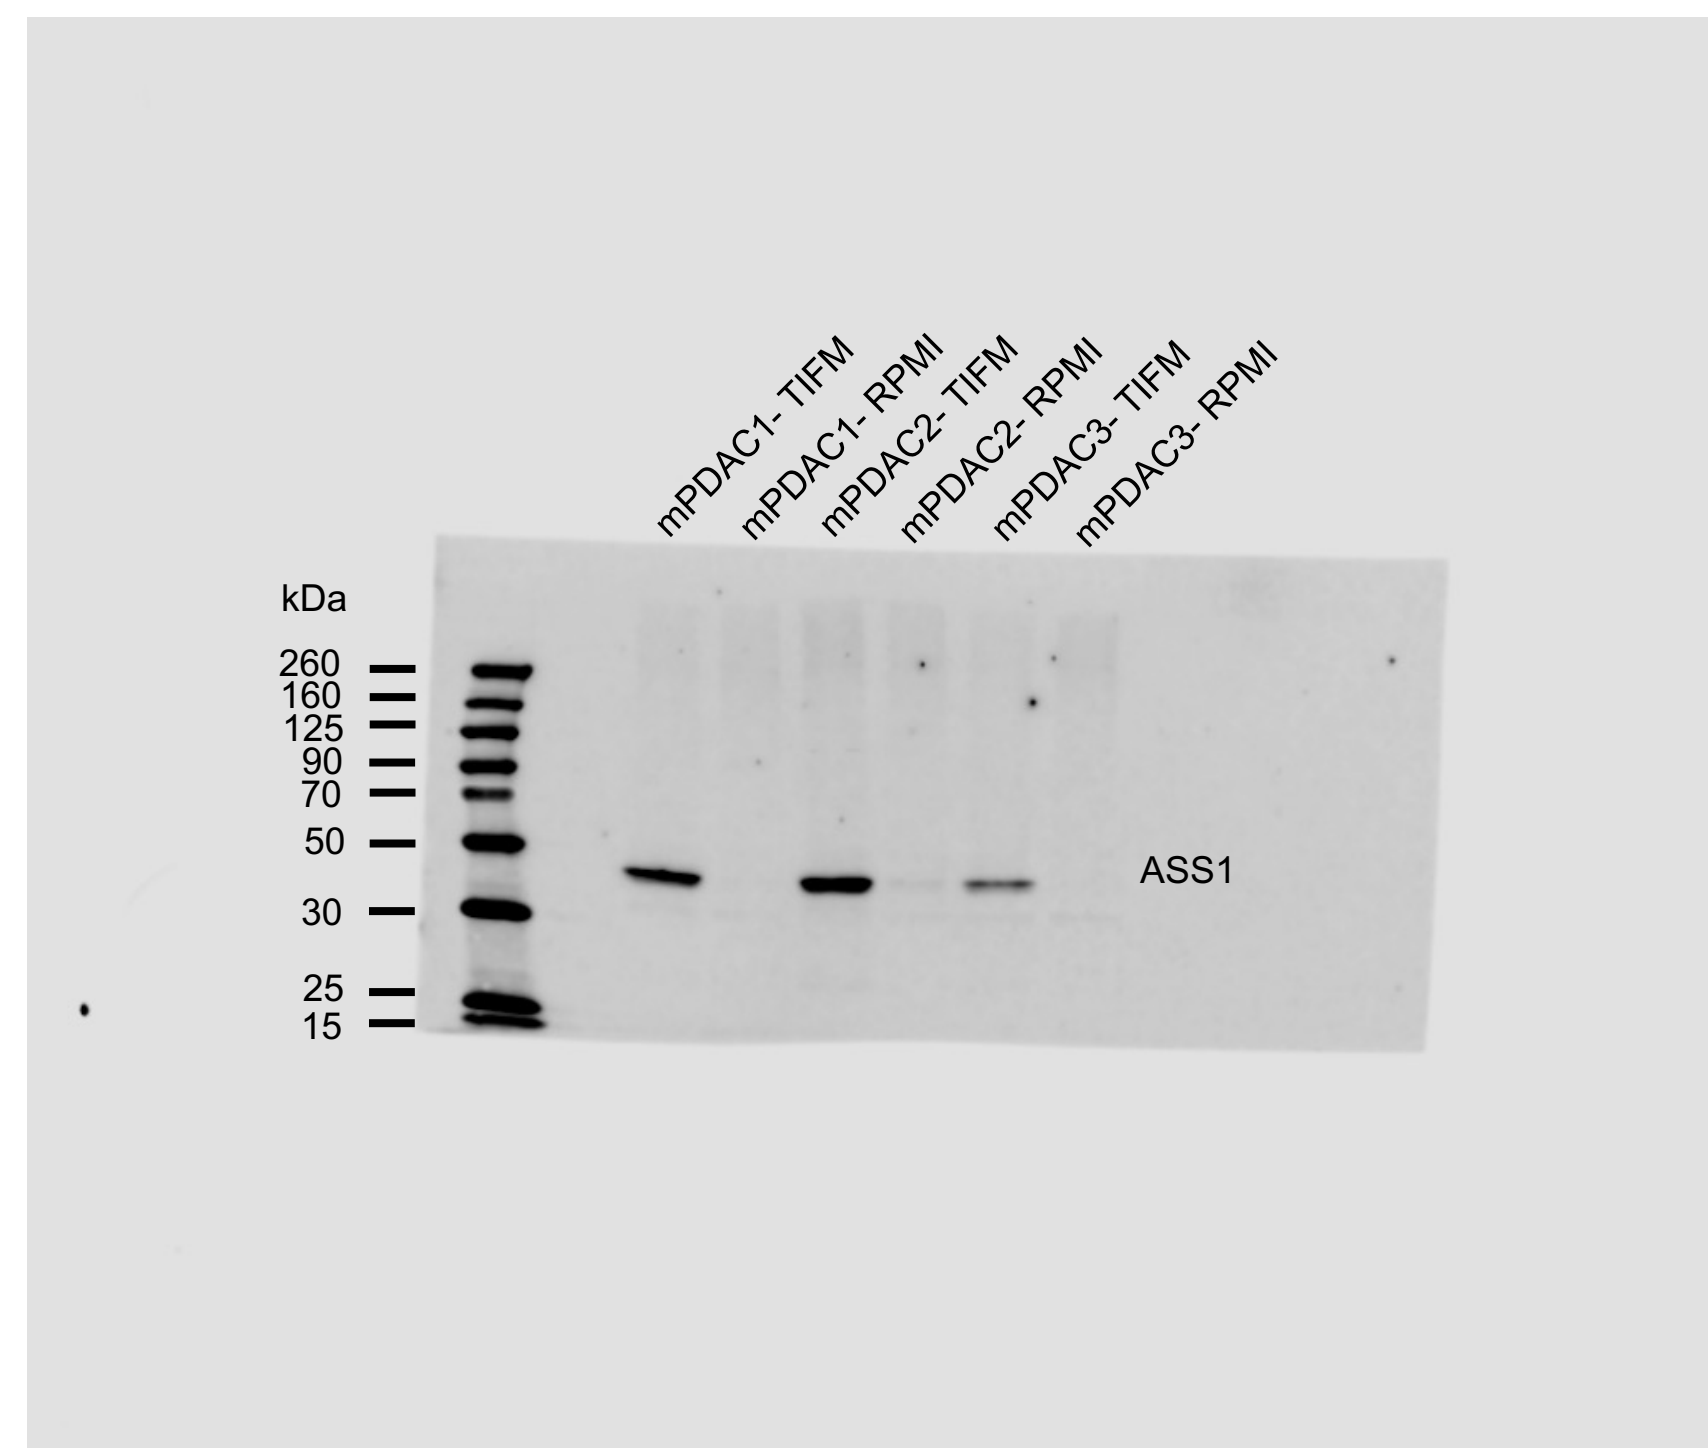

Supplement: fig1-data4 [file elife-81289-fig1-data4-v2.zip]

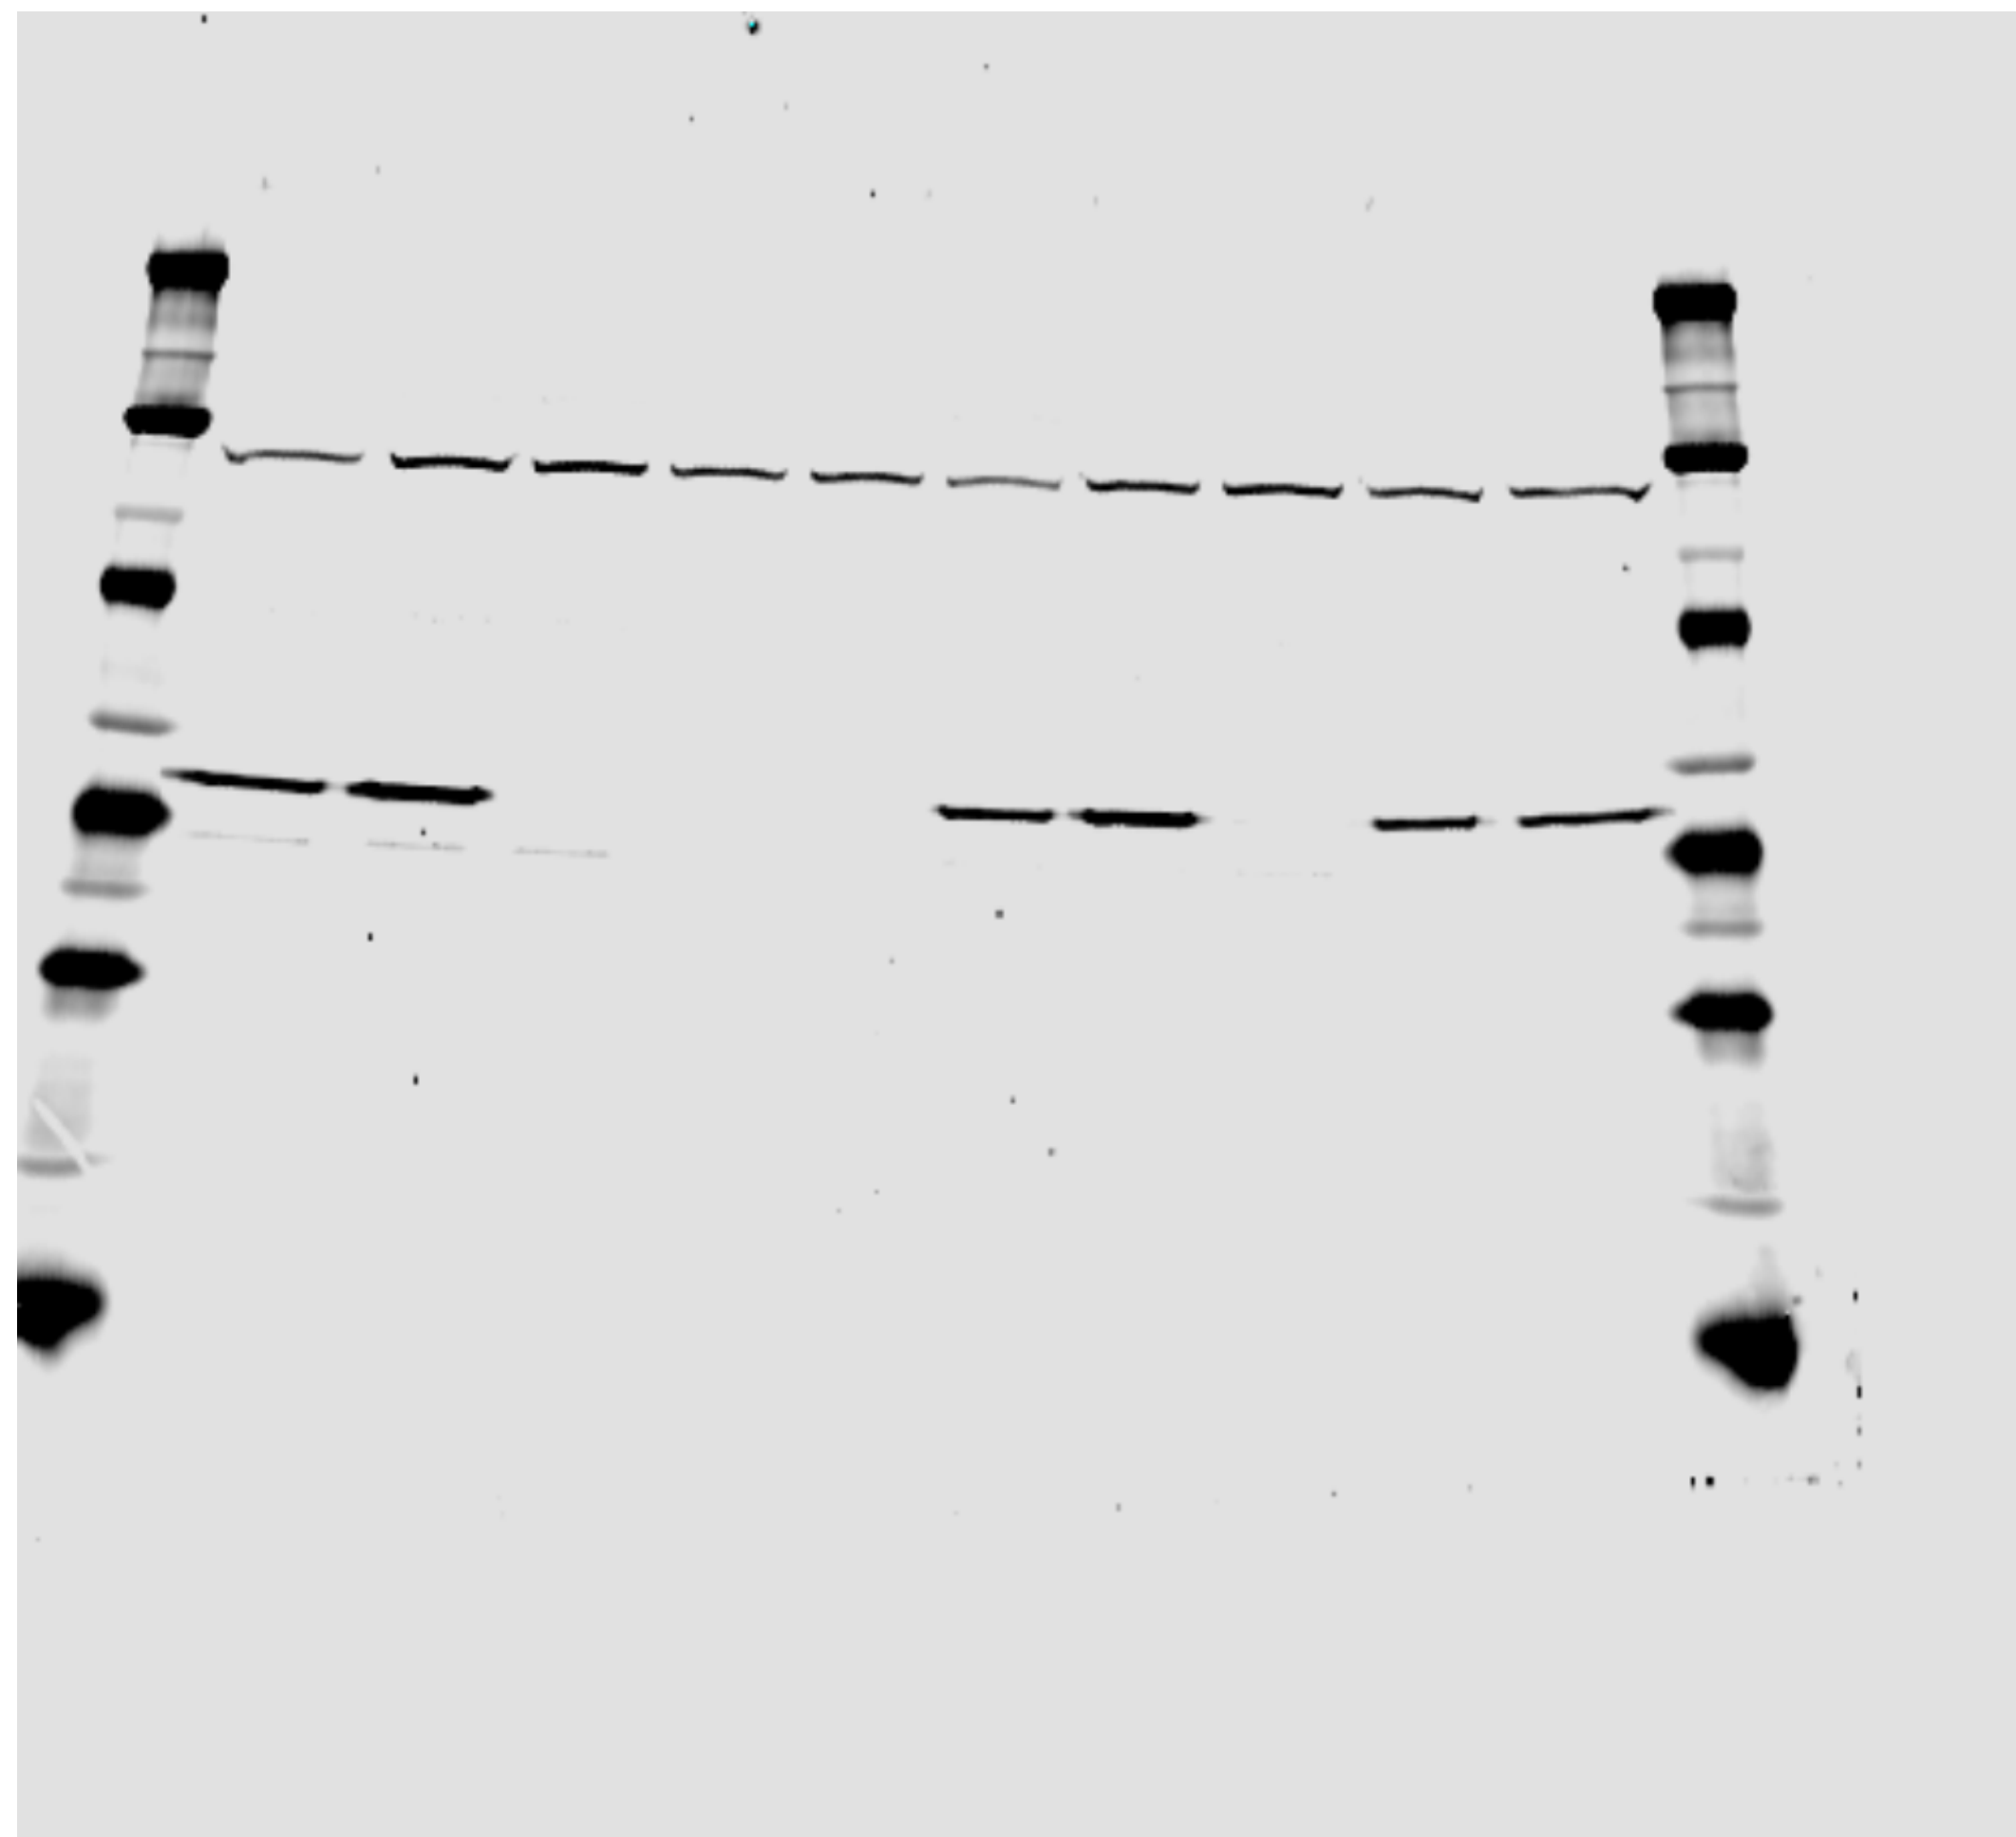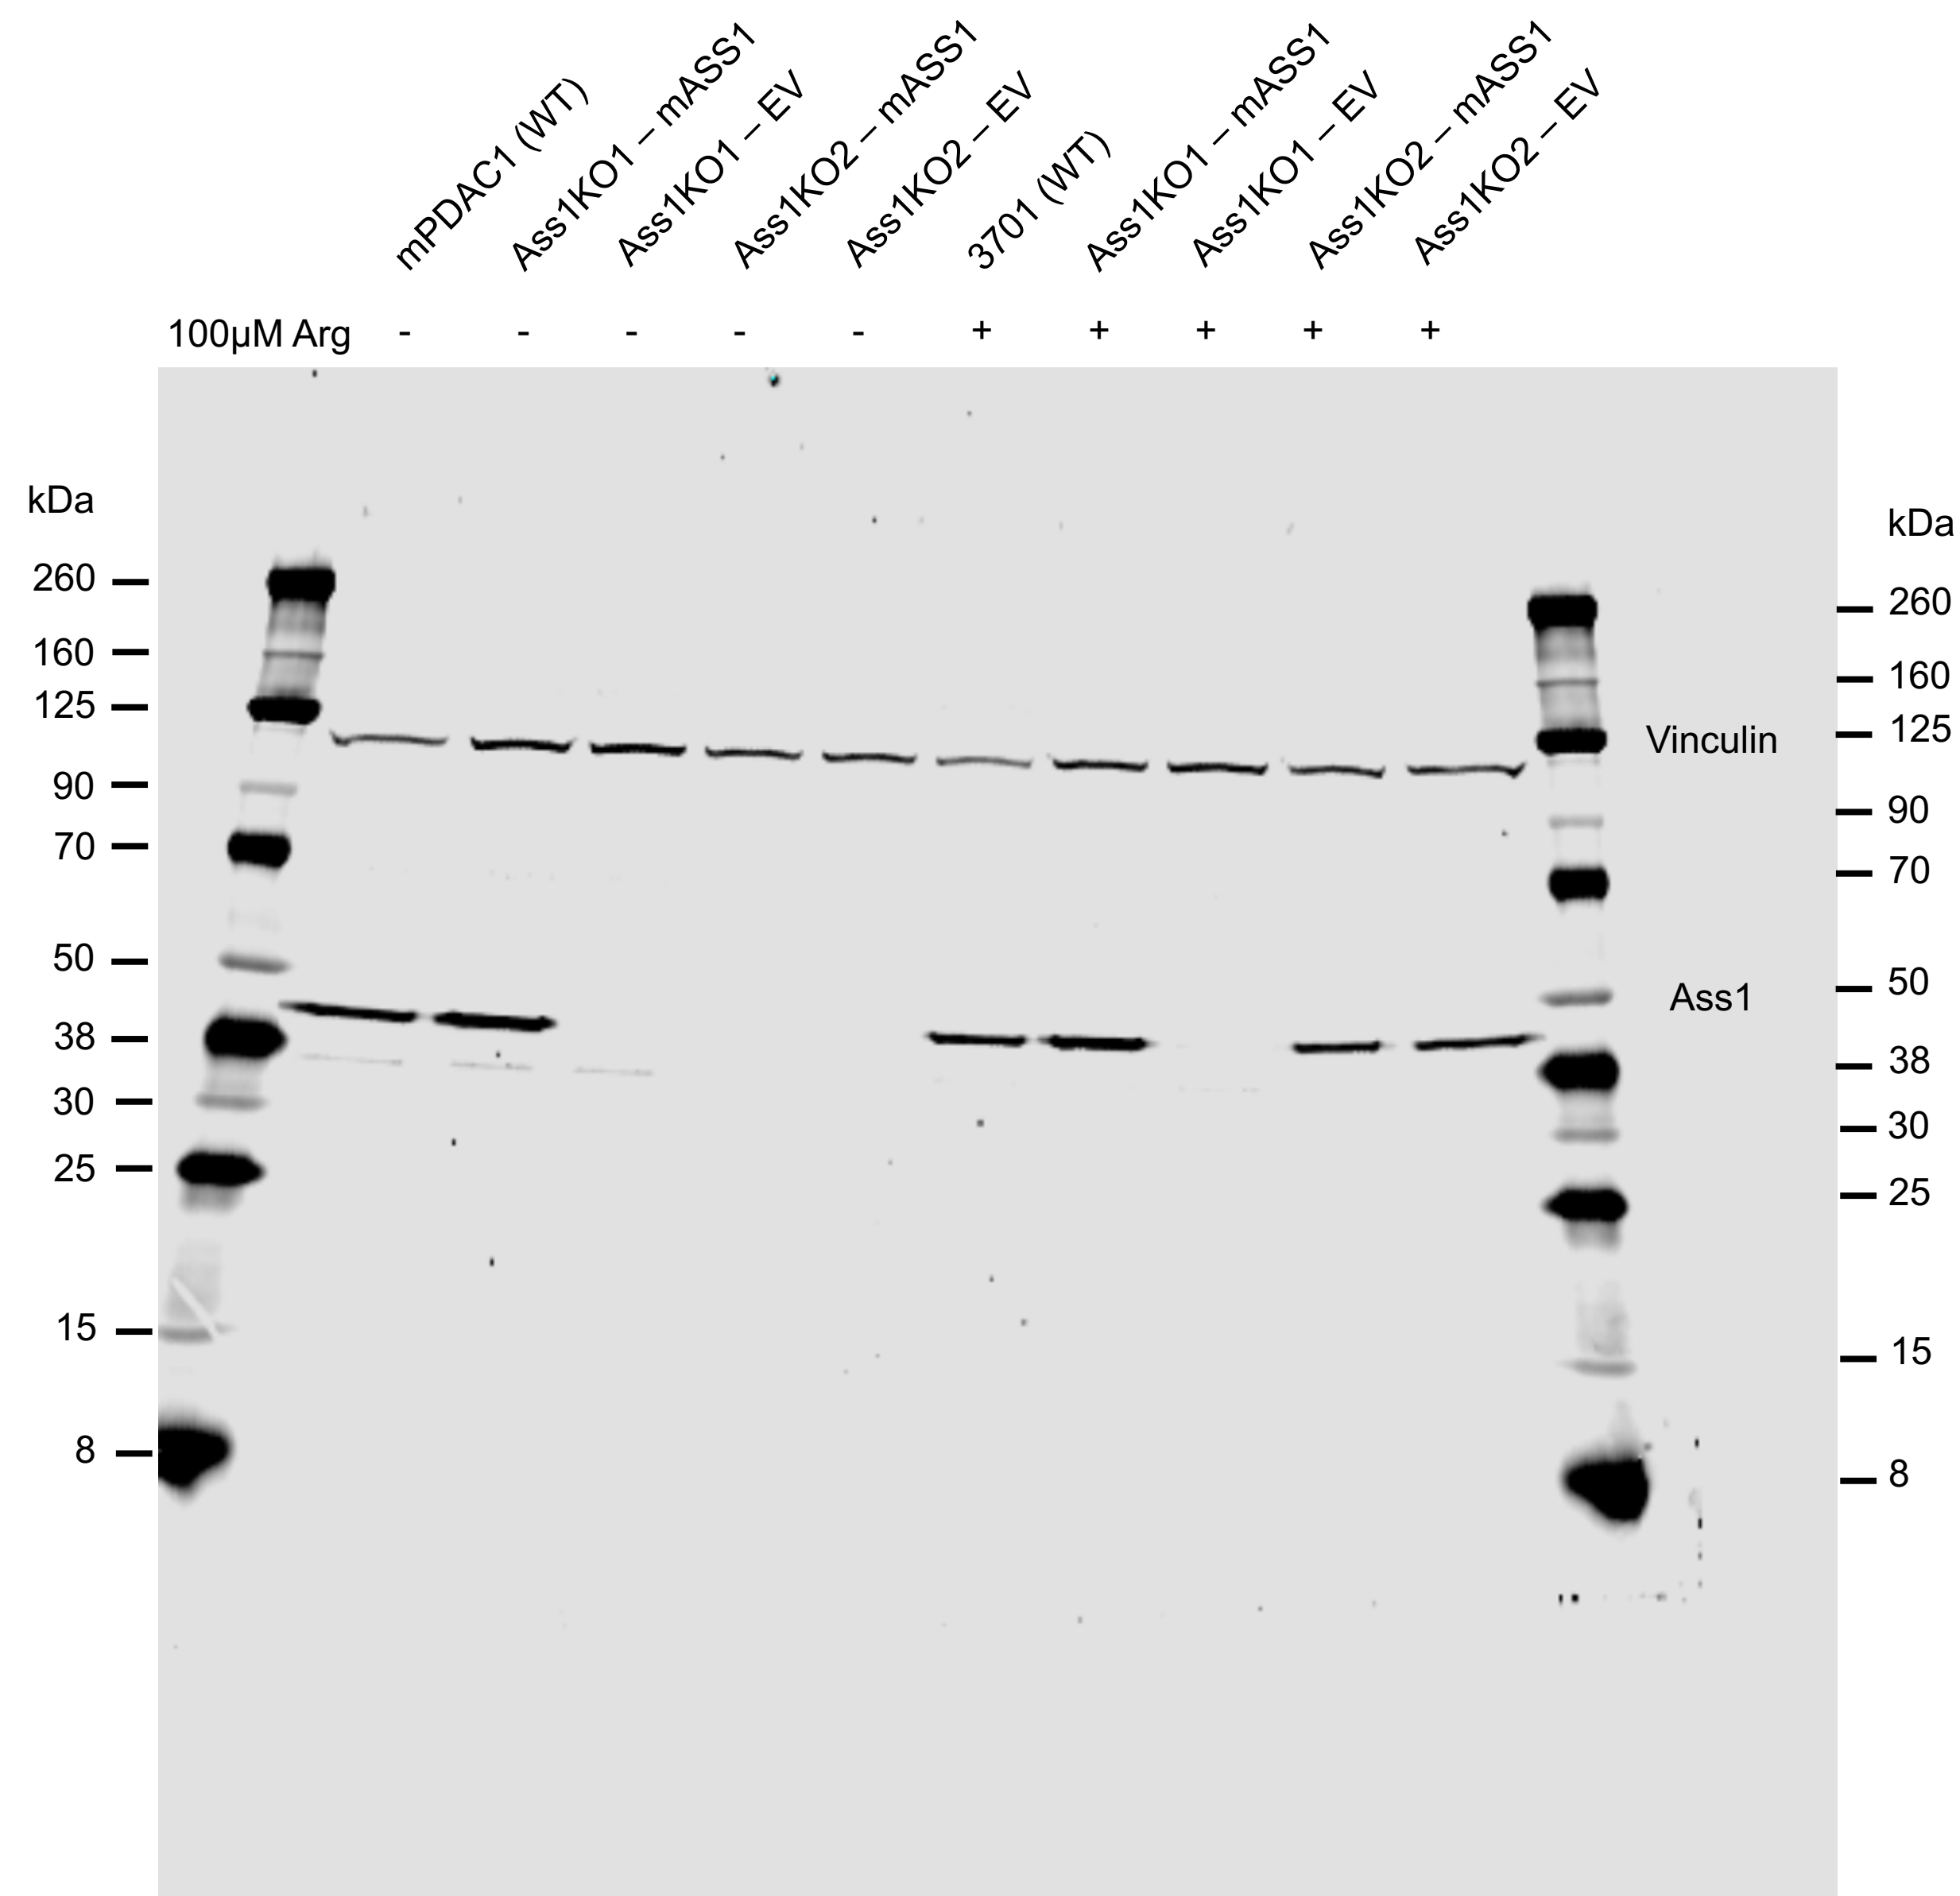

Supplement: fig2-data4 [file elife-81289-fig2-data4-v2.zip]

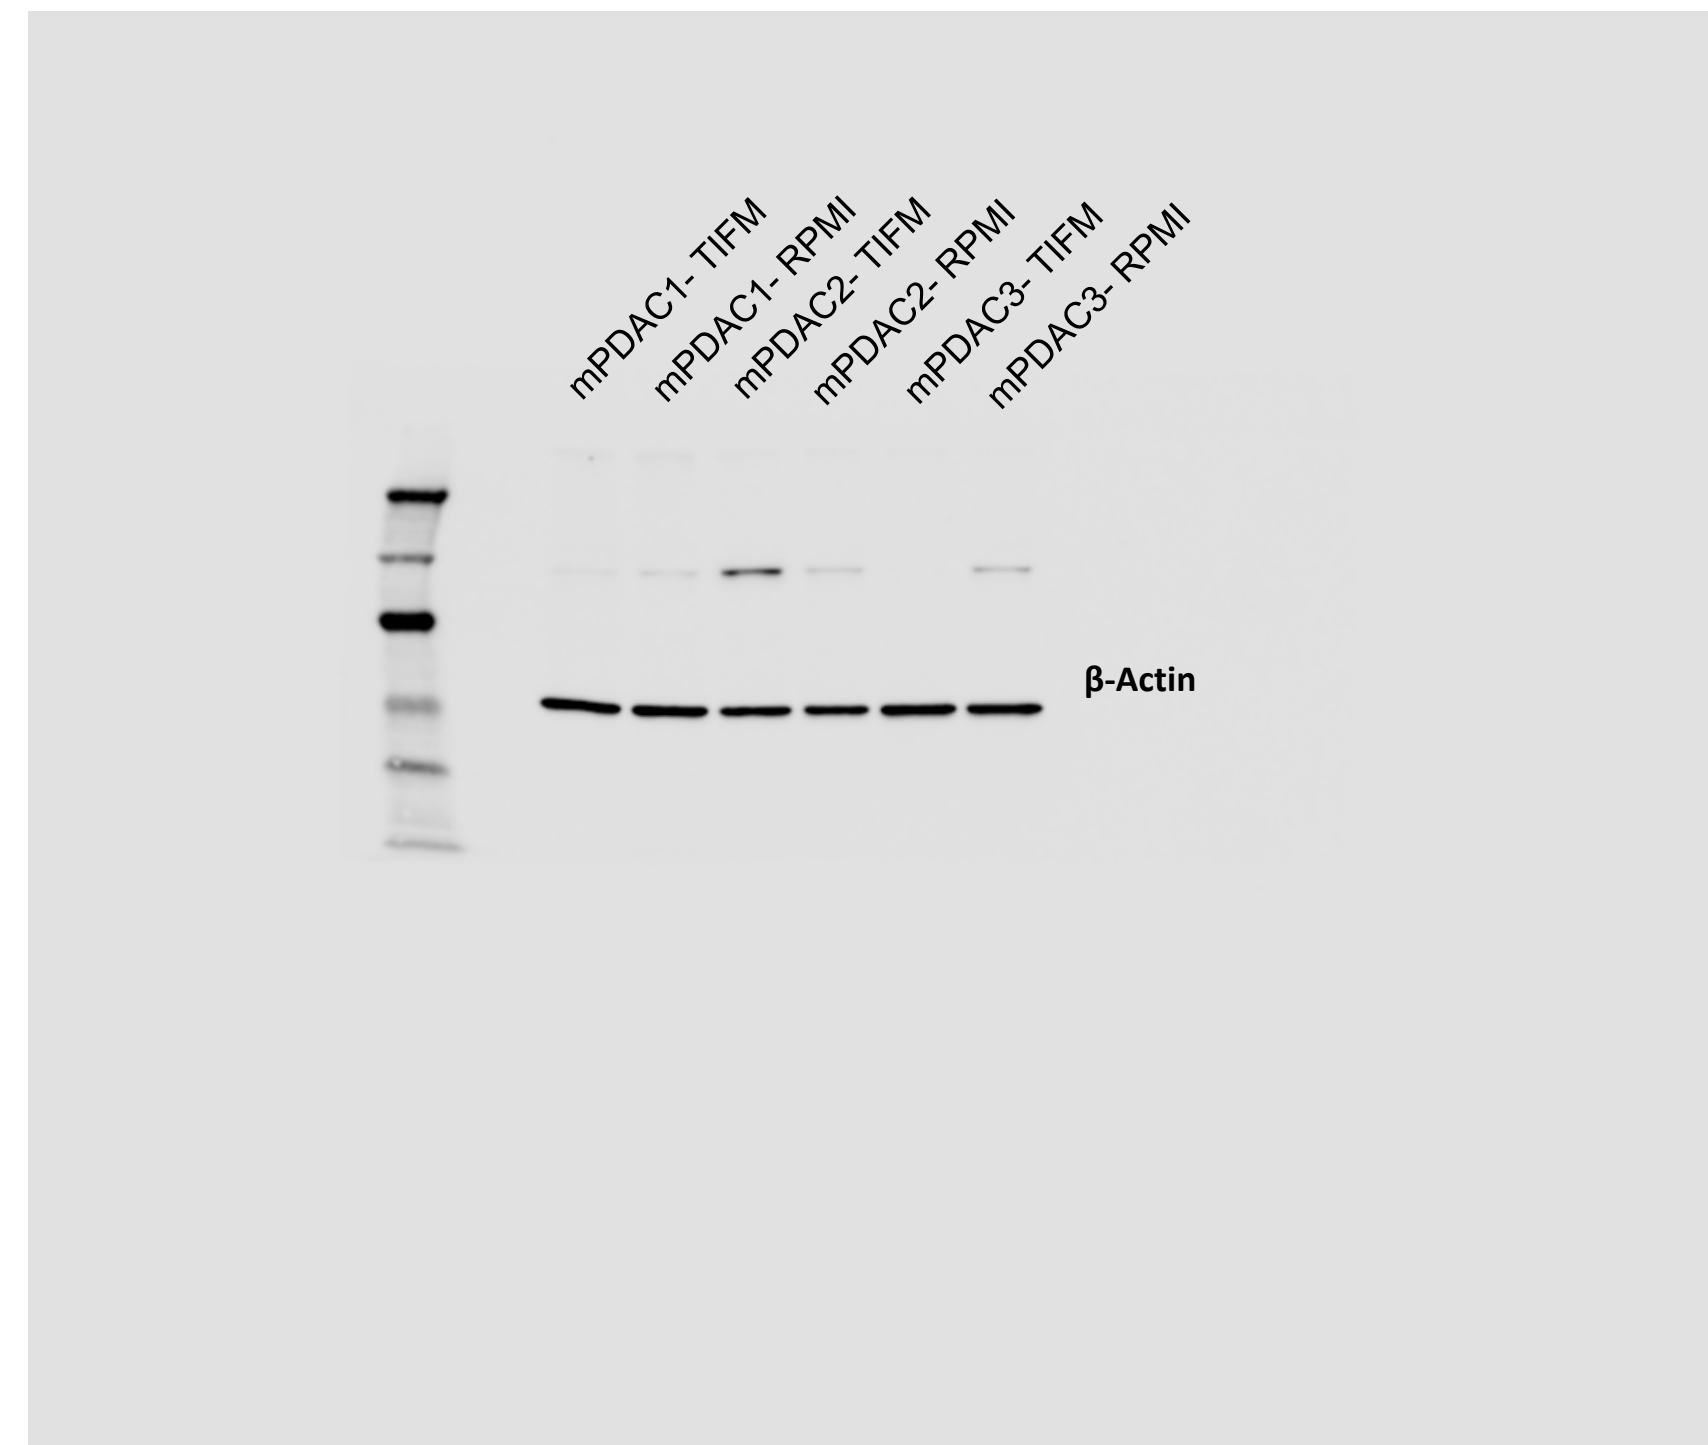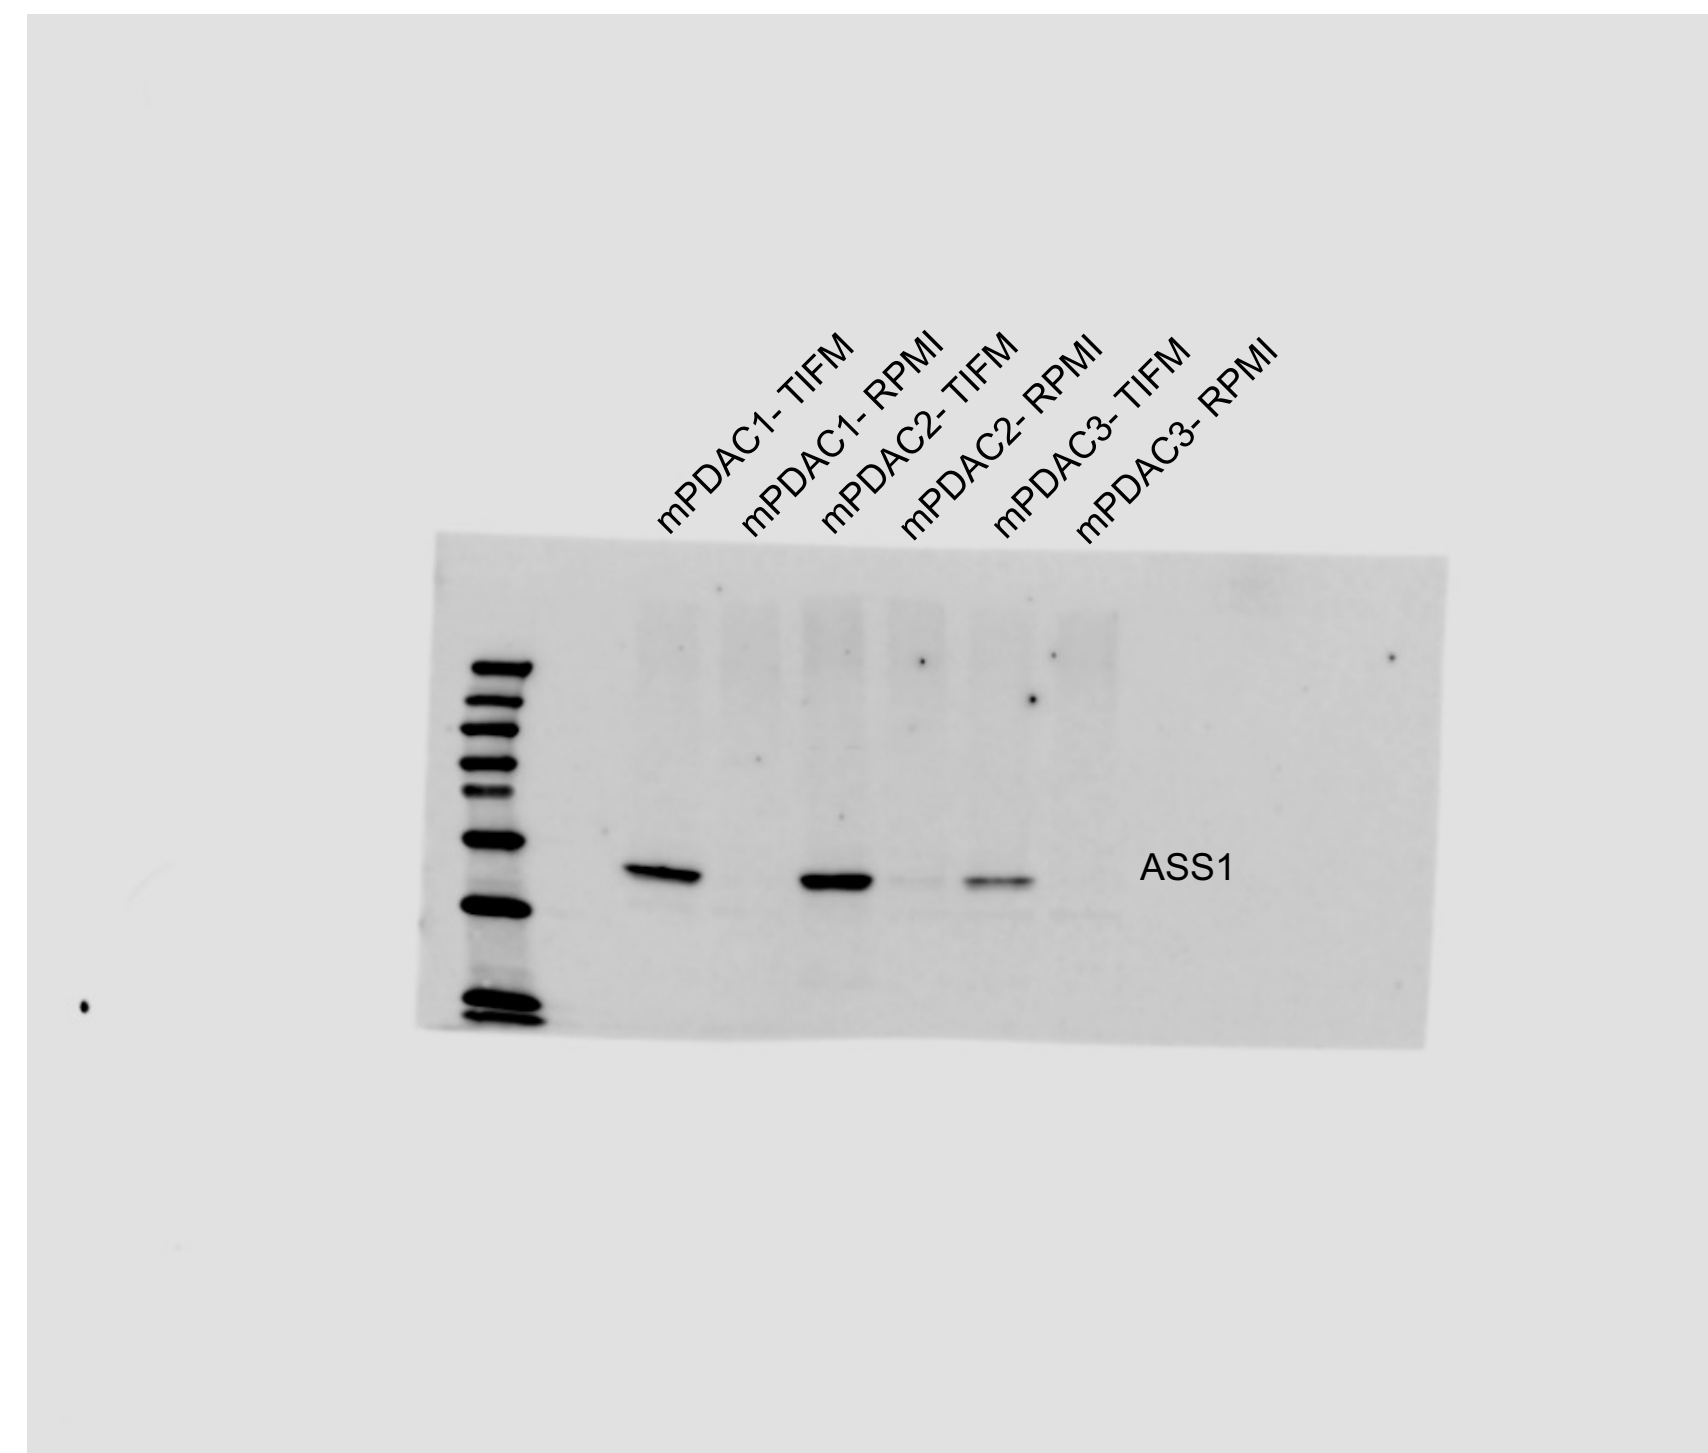

Supplement: supp [file Fig. 1 Source Data 4.pdf › Fig. 1 Source Data 4/Fig. 1 Source Data 4.pdf]

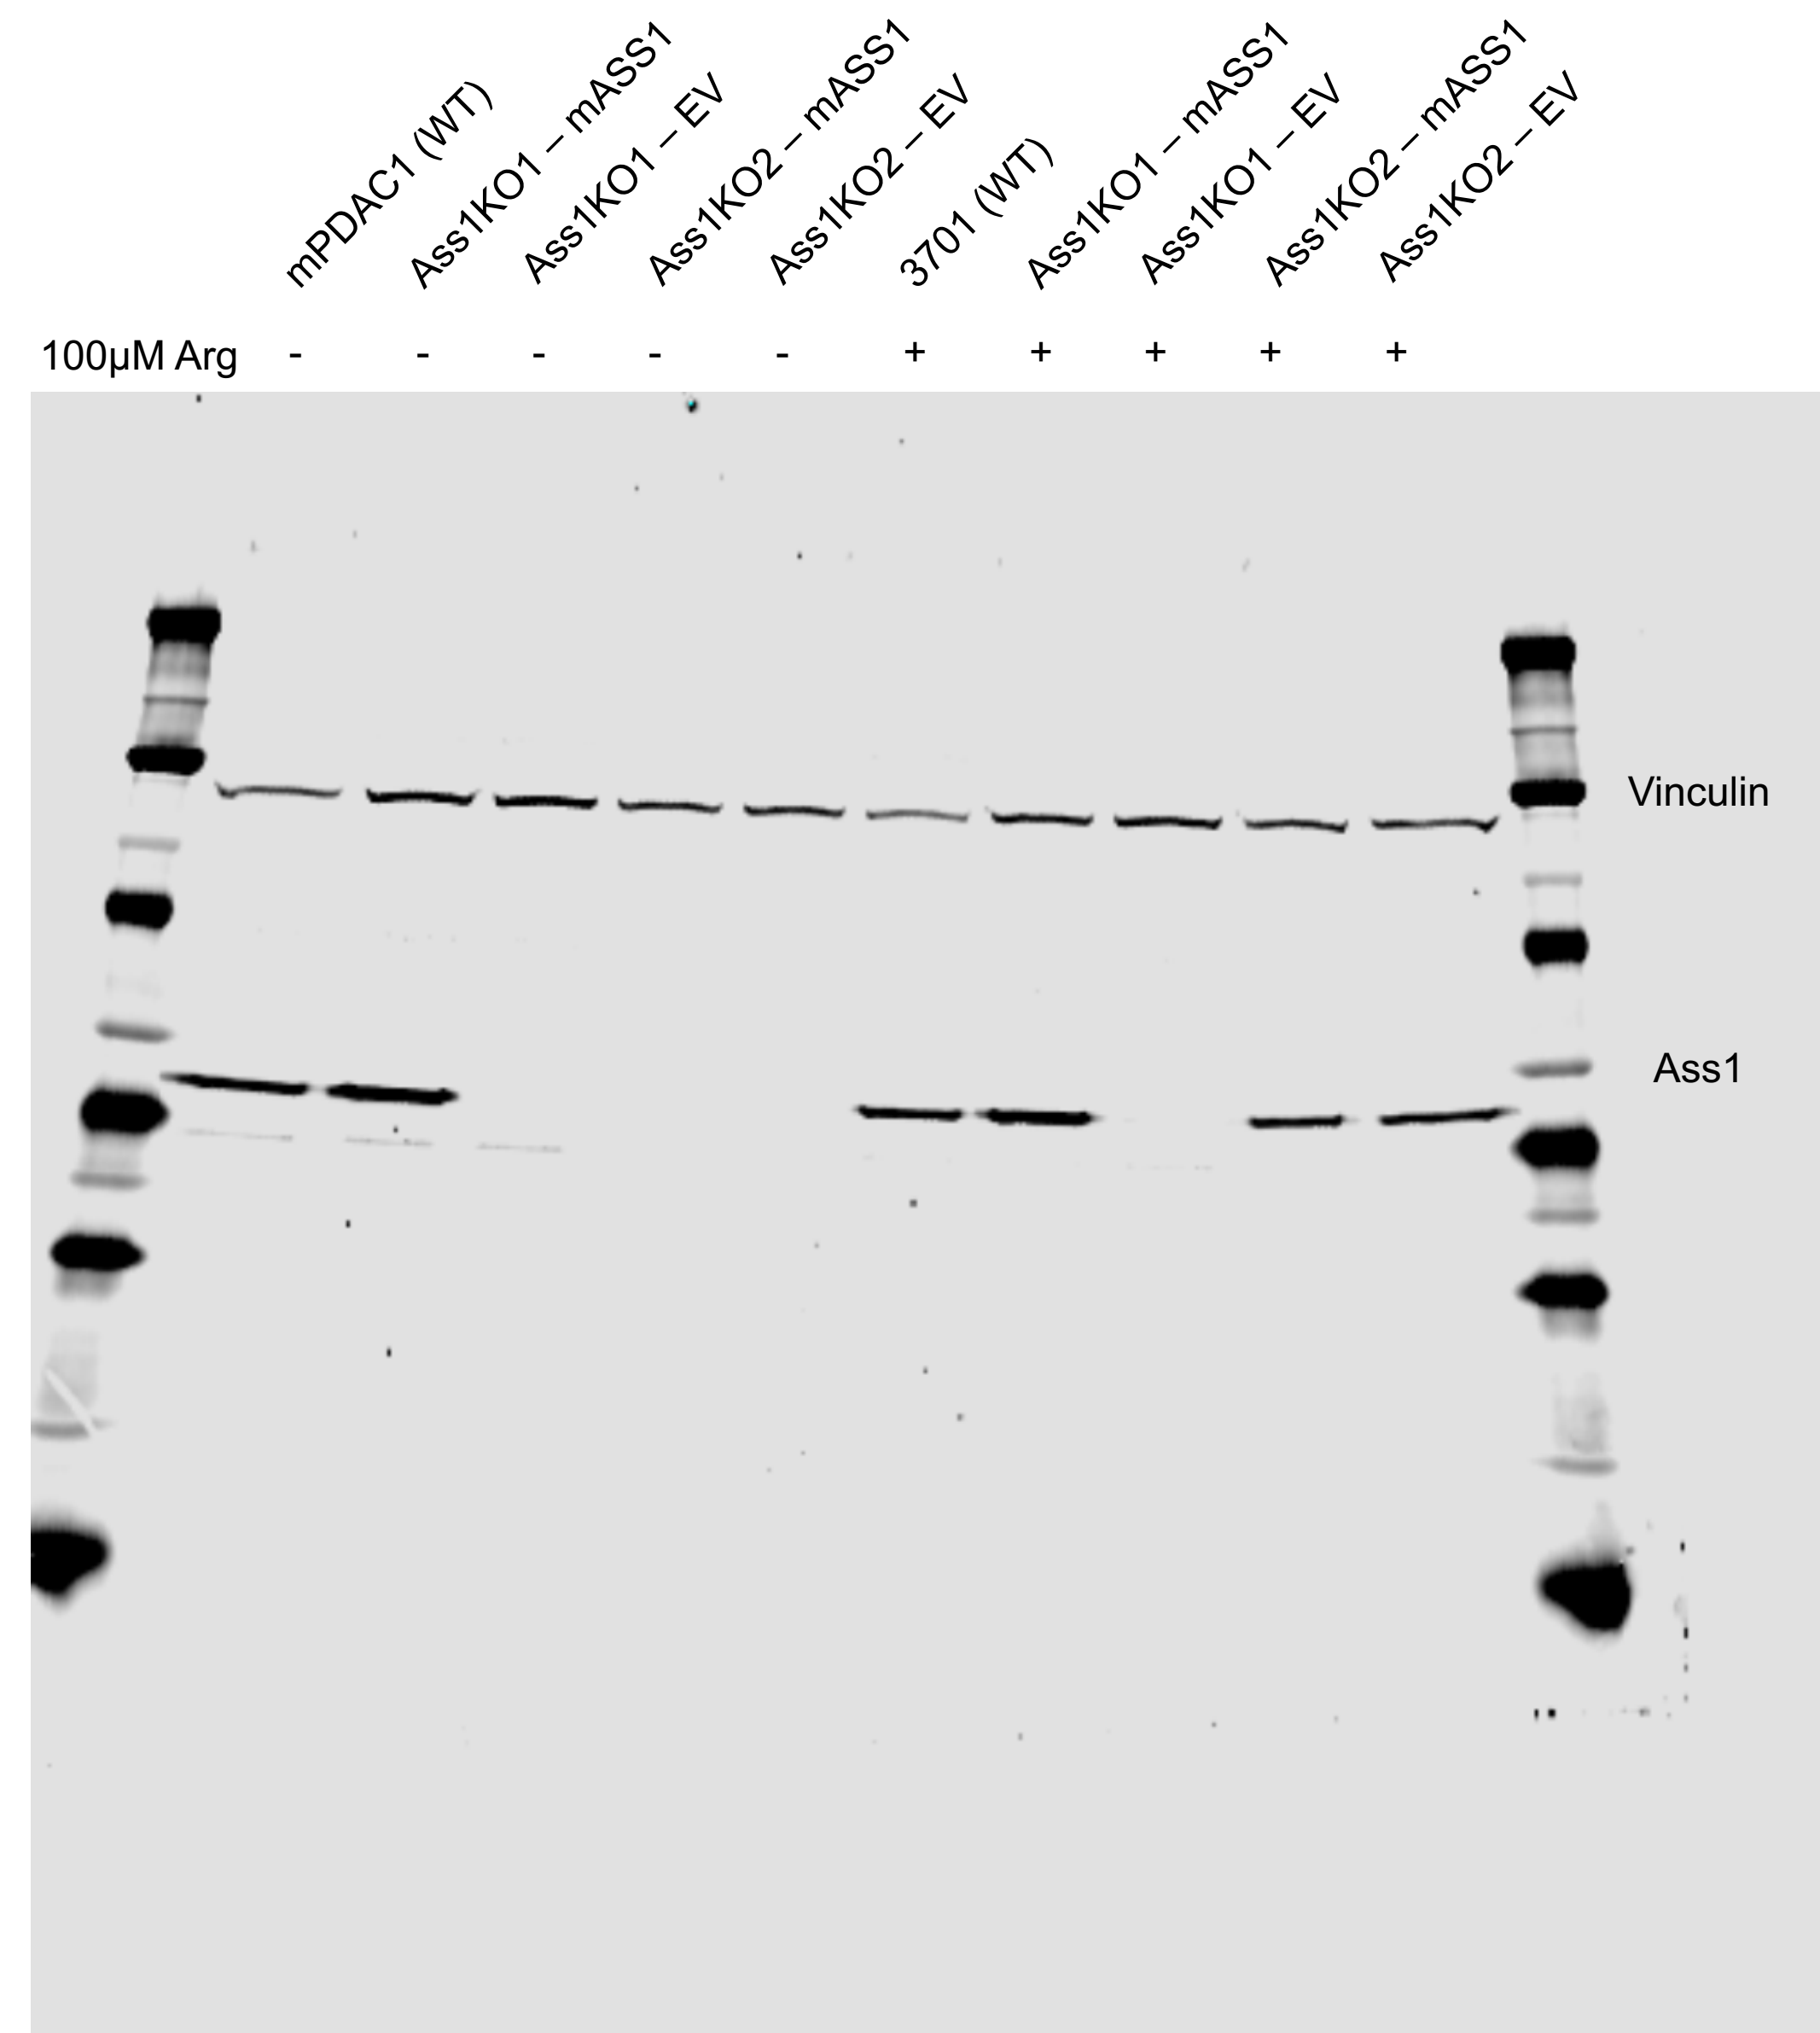

Supplement: supp [file Fig2. Source Data 4.pdf › Fig2. Source Data 4/Fig2. Source Data 4.pdf]

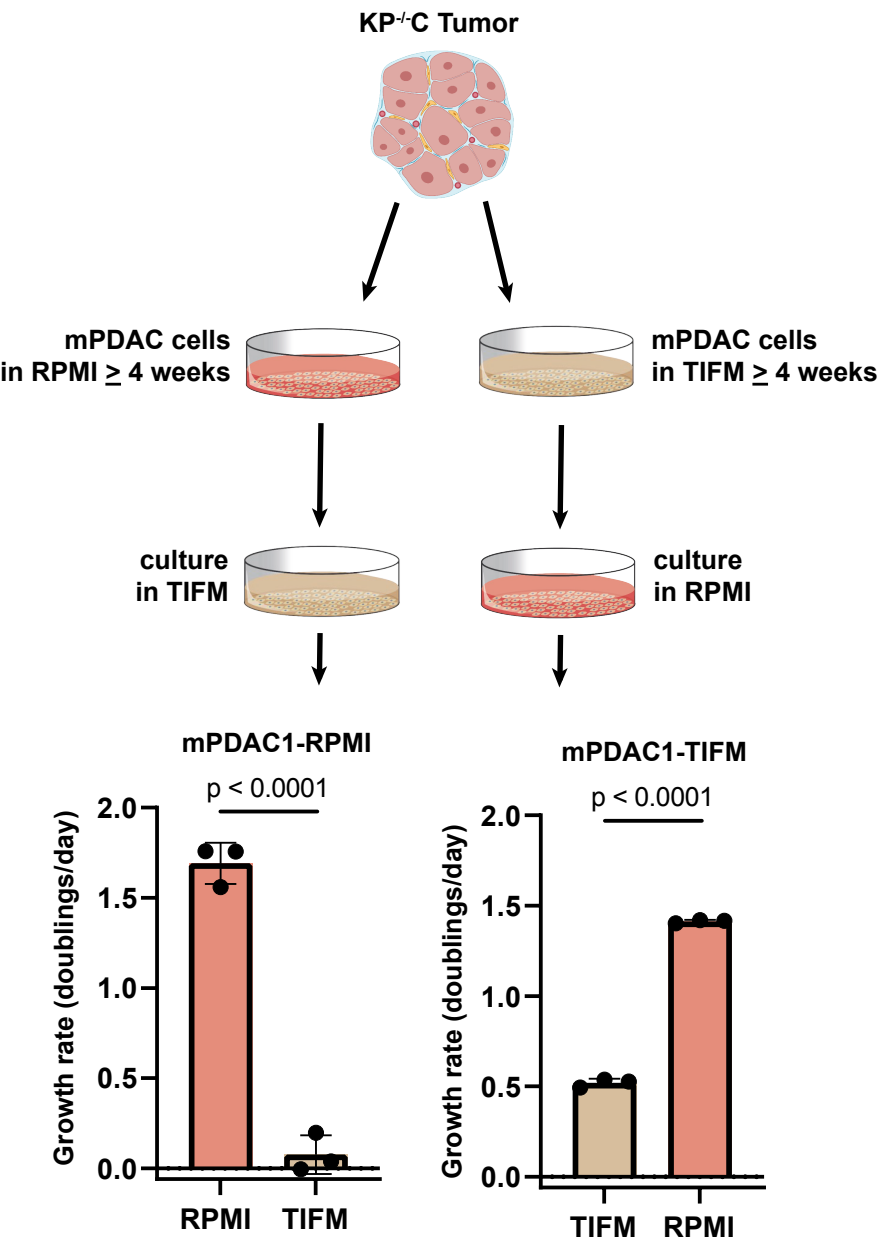

**Figure 1 Supplement 1**

Supplement: supp [file elife_poa_e81289_Figure_1_figure_supplement_1.pdf › elife_poa_e81289_Figure_1_figure_supplement_1.pdf]

**A****Up in vivo gene signature (6,479 genes)**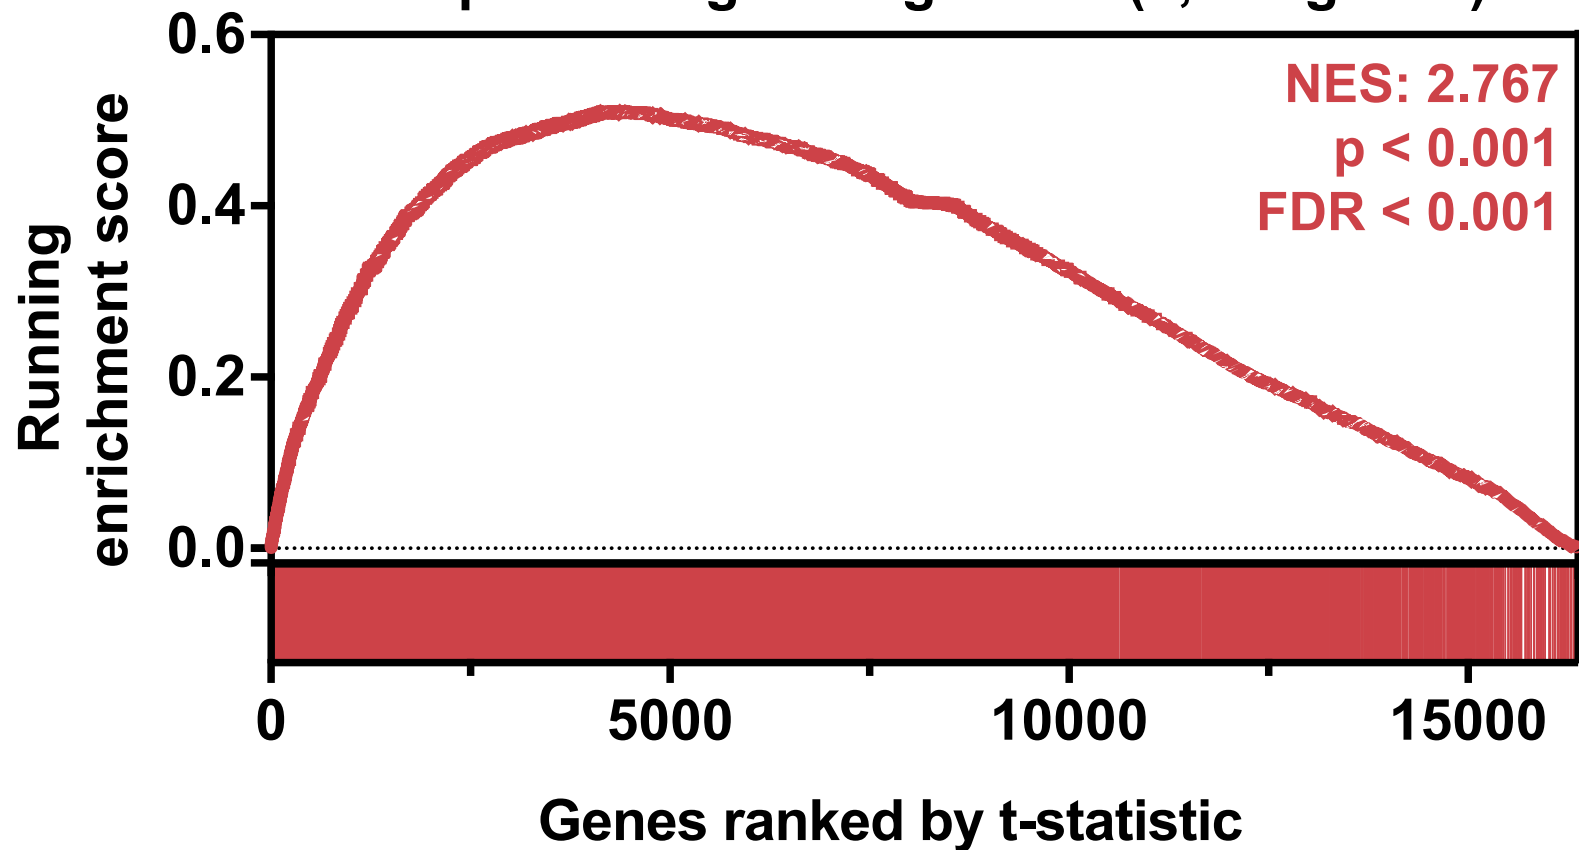**B****Down in vivo gene signature (5,317 genes)**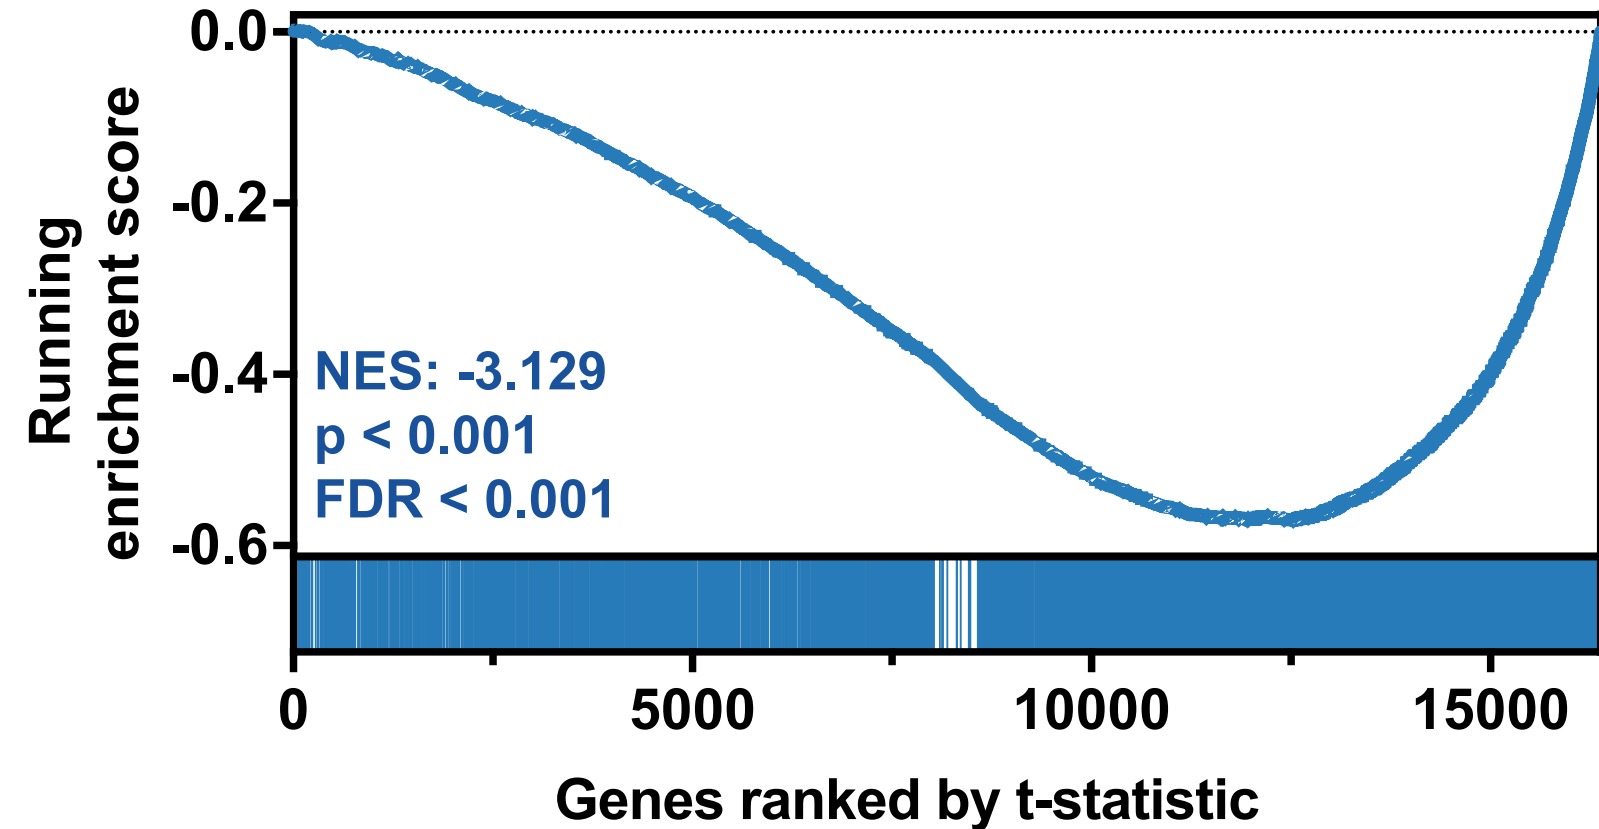**Figure 1 Supplement 2**

Supplement: supp [file elife_poa_e81289_Figure_1_figure_supplement_2.pdf › elife_poa_e81289_Figure_1_figure_supplement_2.pdf]

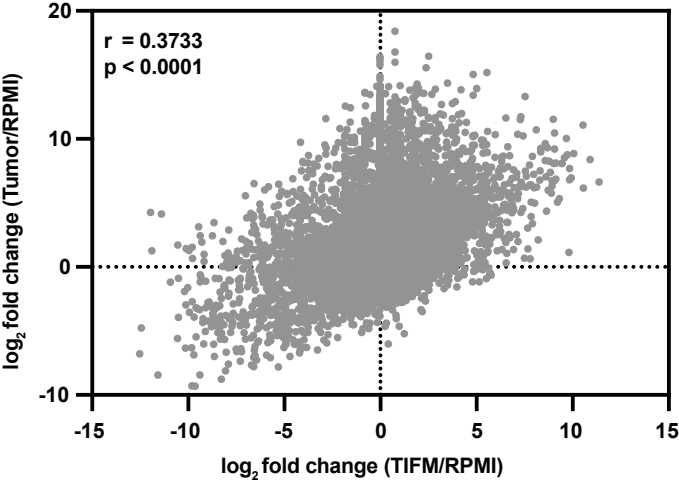

Figure 1 Supplement 3

Supplement: supp [file elife_poa_e81289_Figure_1_figure_supplement_3.pdf › elife_poa_e81289_Figure_1_figure_supplement_3.pdf]

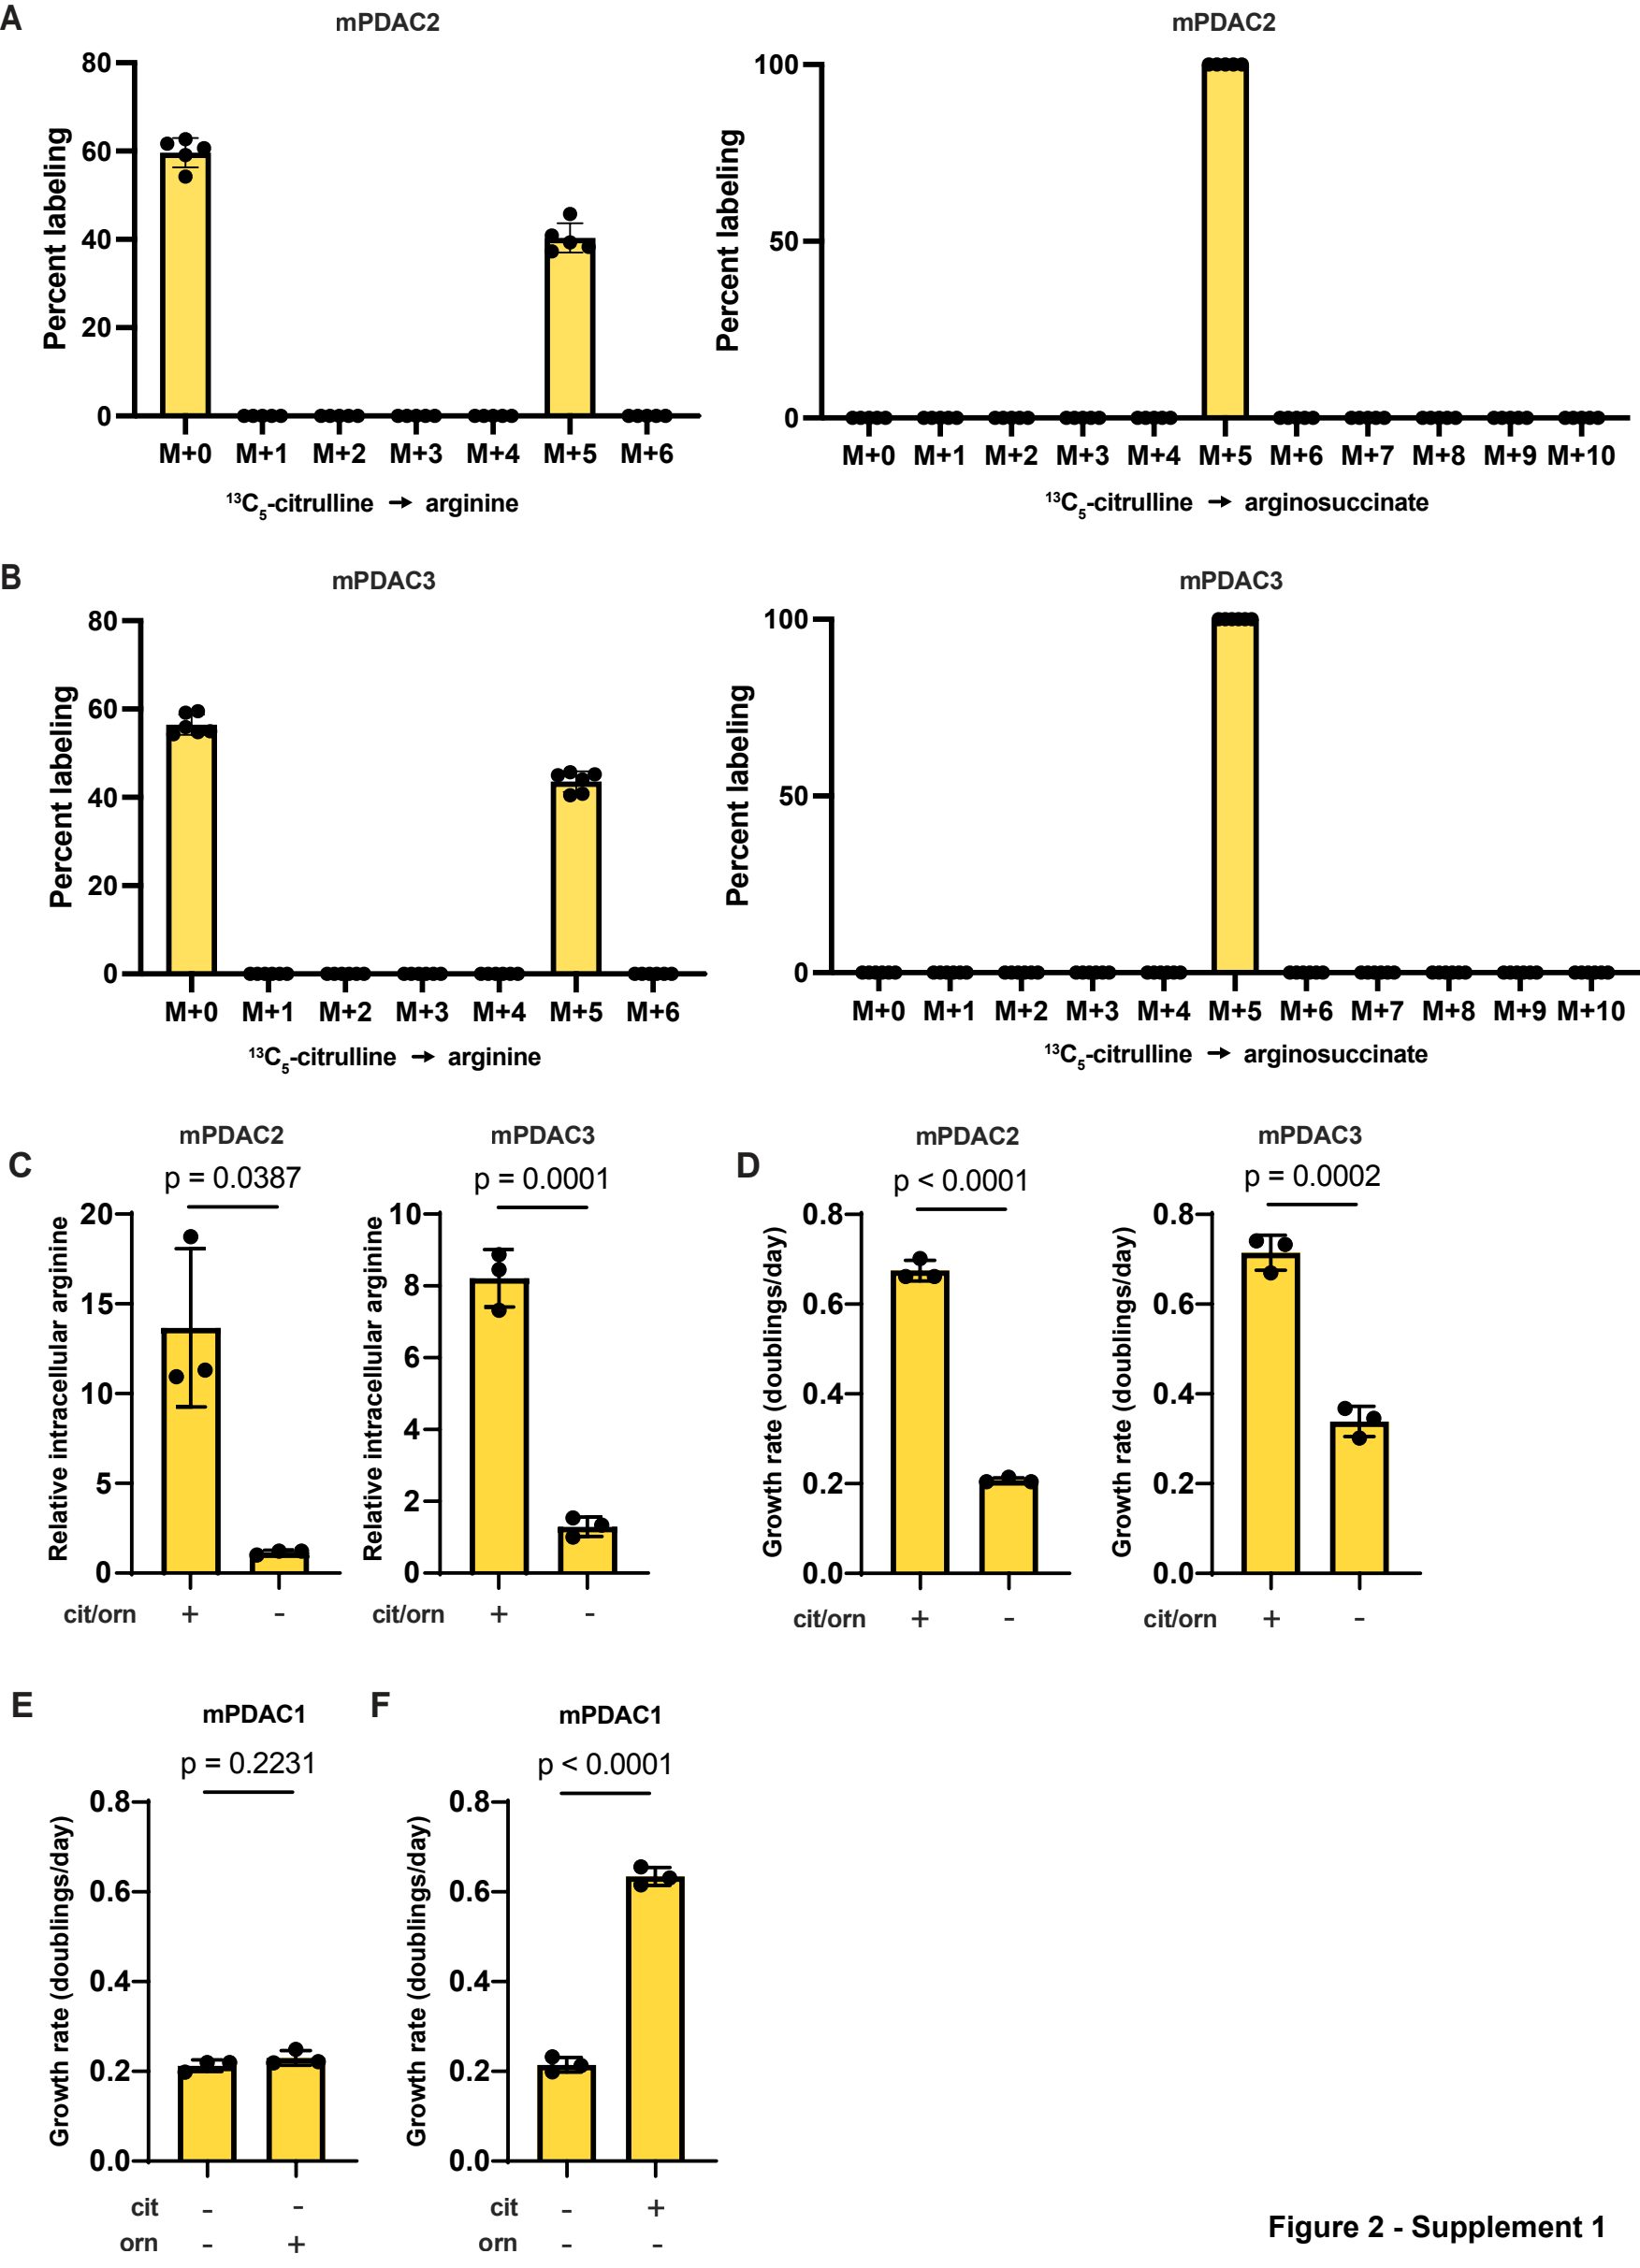

Figure 2 - Supplement 1

Supplement: supp [file elife_poa_e81289_Figure_2_figure_supplement_1.pdf › elife_poa_e81289_Figure_2_figure_supplement_1.pdf]

# mPDAC1-RPMI

$p < 0.0001$

$p < 0.0001$

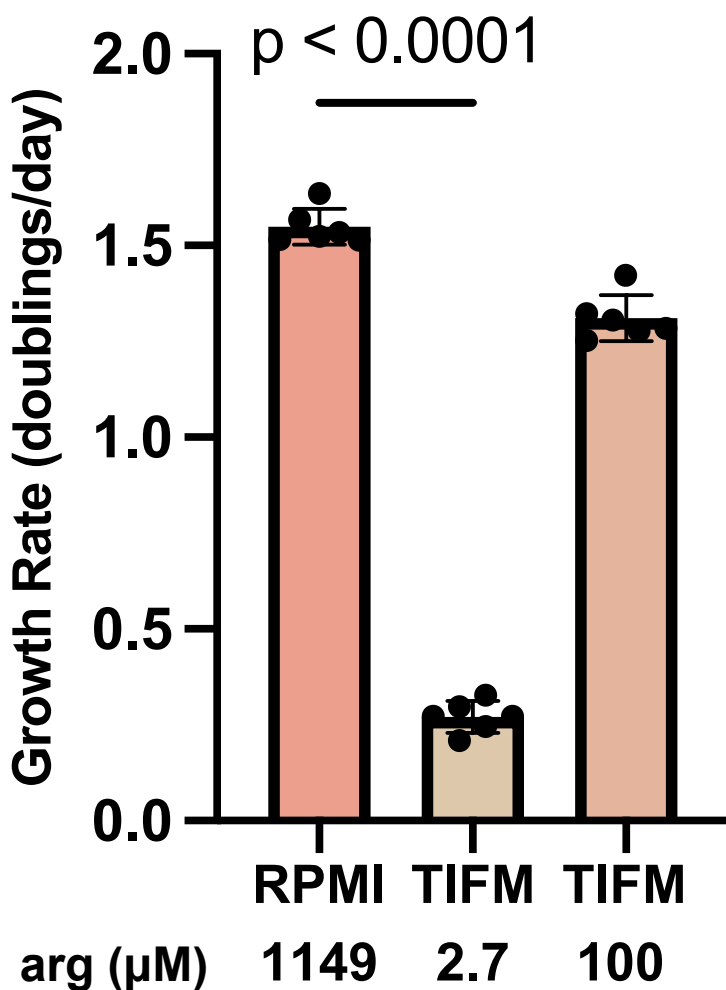

Figure 2 Supplement 2

Supplement: supp [file elife_poa_e81289_Figure_2_figure_supplement_2.pdf › elife_poa_e81289_Figure_2_figure_supplement_2.pdf]

**G** mPDAC3 orthotopic tumors

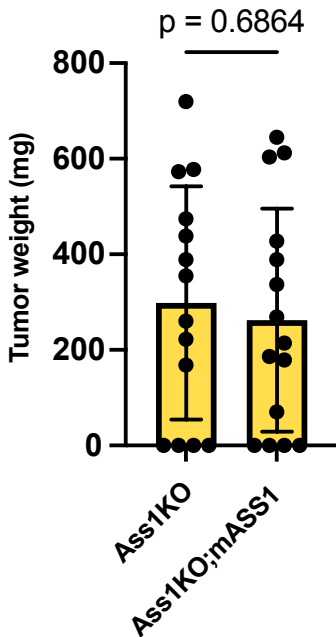

**H** mPDAC3 orthotopic tumors

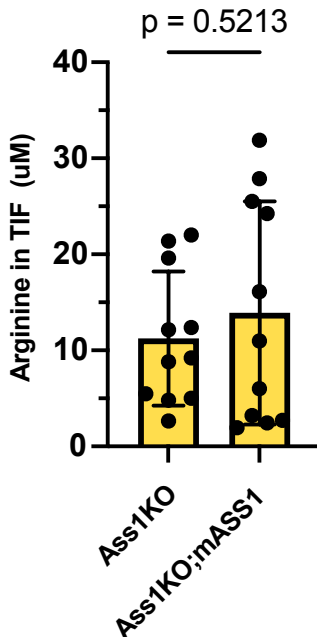

**Figure 2 - Supplement 3**

Supplement: supp [file elife_poa_e81289_Figure_2_figure_supplement_3.pdf › elife_poa_e81289_Figure_2_figure_supplement_3.pdf]

A

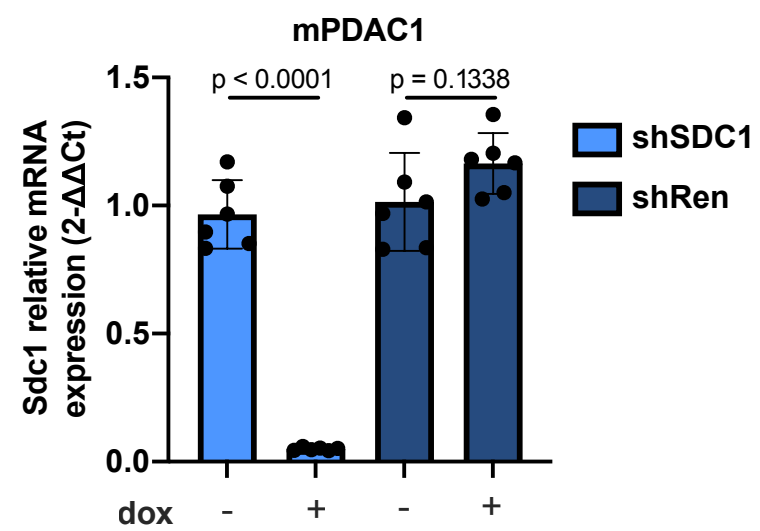

B

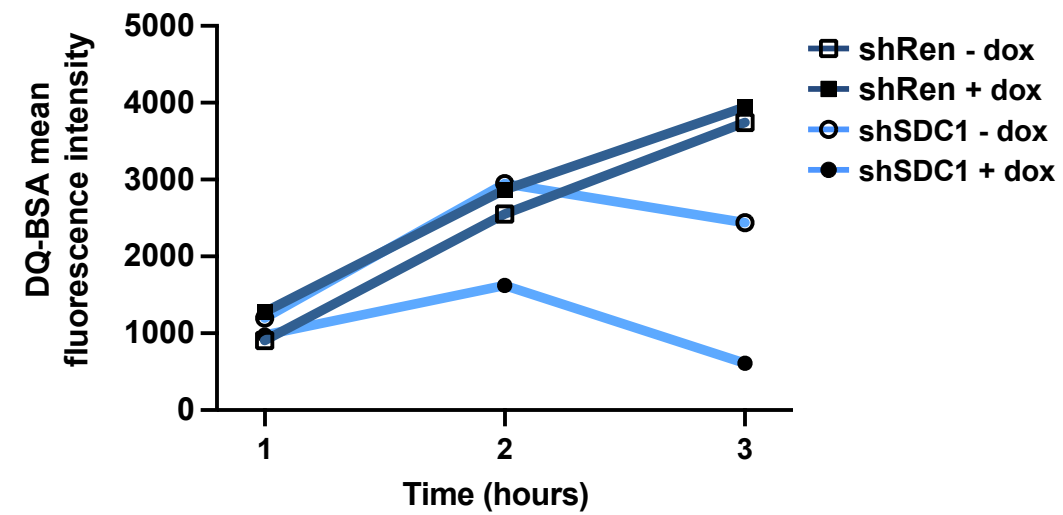

C

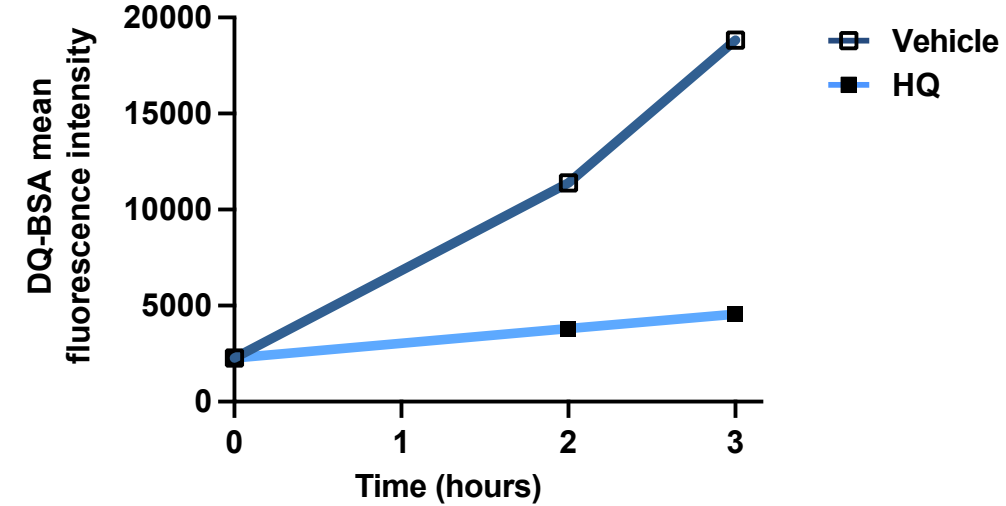

D

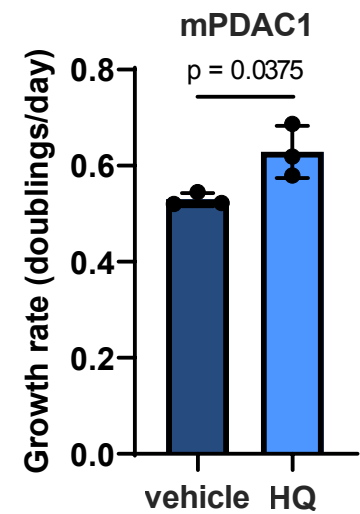

E

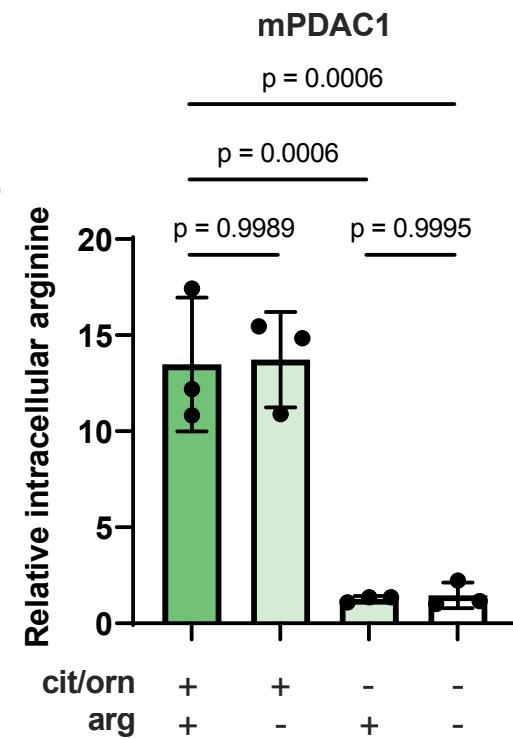

F

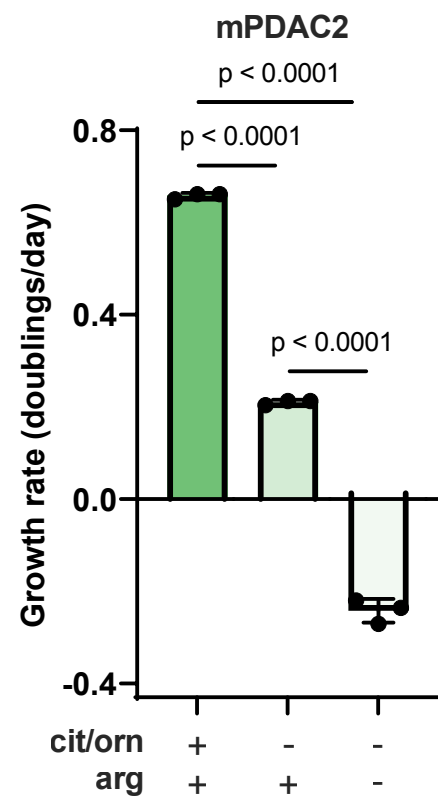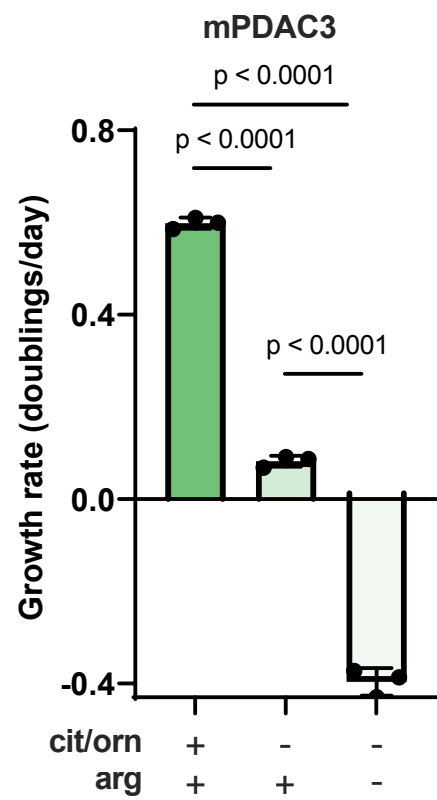

Figure 3 Supplement 1

Supplement: supp [file elife_poa_e81289_Figure_3_figure_supplement_1.pdf › elife_poa_e81289_Figure_3_figure_supplement_1.pdf]

# Arginine

$p = 0.0317$

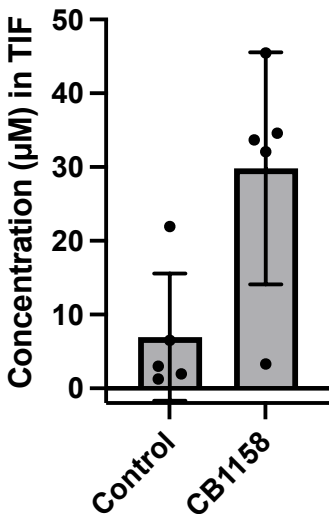

Figure 4 Supplement 1

Supplement: supp [file elife_poa_e81289_Figure_4_figure_supplement_1.pdf › elife_poa_e81289_Figure_4_figure_supplement_1.pdf]

**A****ASS1****Arg1fl/fl**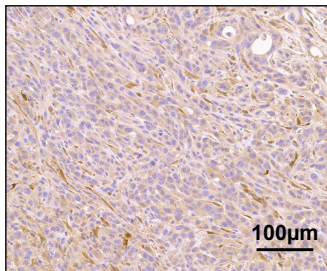**Lyz2-Cre;Arg1fl/fl**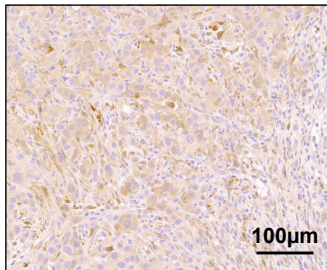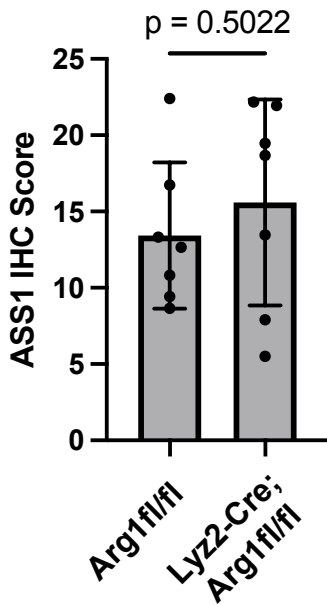**Figure 4 Supplement 2**

Supplement: supp [file elife_poa_e81289_Figure_4_figure_supplement_2.pdf › elife_poa_e81289_Figure_4_figure_supplement_2.pdf]

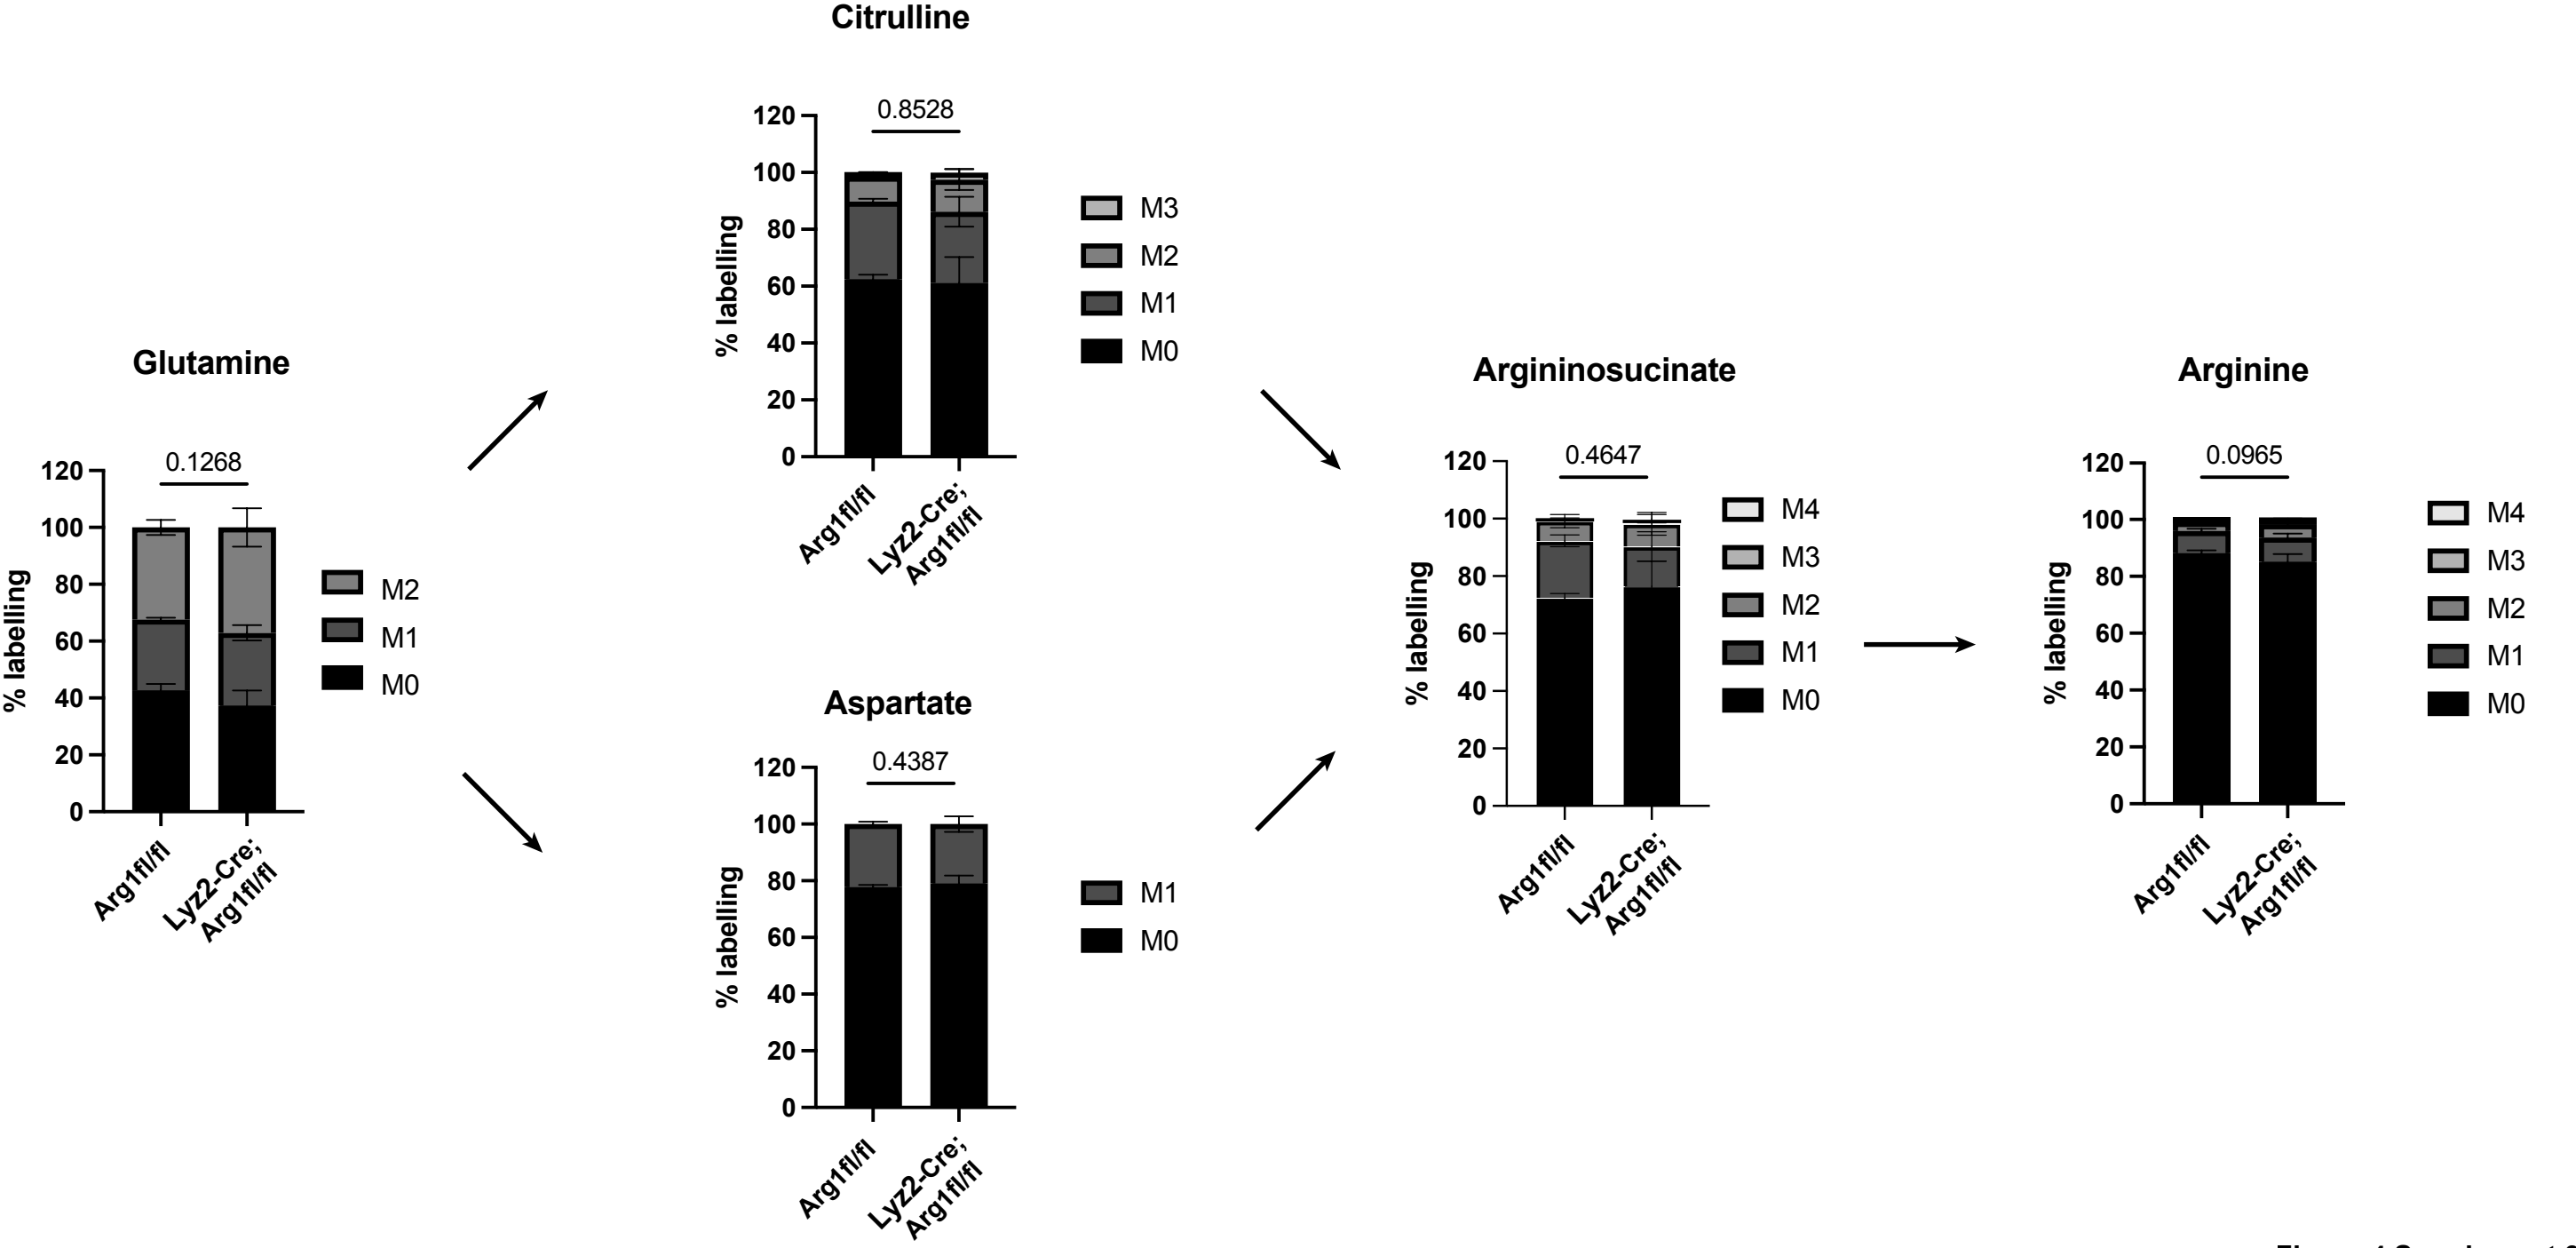

Figure 4 Supplement 3

Supplement: supp [file elife_poa_e81289_Figure_4_figure_supplement_3.pdf › elife_poa_e81289_Figure_4_figure_supplement_3.pdf]
